# Supplementary material for: Catalytic asymmetric synthesis of N-substituted tetrahydroquinoxalines via regioselective Heyns rearrangement and stereoselective transfer hydrogenation in one pot
Source: PubMed Central journal article supplement — Chem Sci. 2021 Feb 19;12(13):4789–93. doi: 10.1039/d0sc06264b (PMC8179646; doi:10.1039/d0sc06264b), 2021-02-19

## Catalytic Asymmetric Synthesis of N-Substituted Tetrahydroquinoxalines via Regioselective Heyns Rearrangement and Stereoselective Transfer Hydrogenation in One Pot

Jin Huang <sup>[a,b]</sup>, Guang-xun Li\*<sup>[a]</sup>, Gao-feng Yang<sup>[a]</sup>, Ding-qiang Fu<sup>[a]</sup>, Xiao-kang Nie<sup>[a]</sup>, Xin Cui<sup>[a]</sup>, Jin-zhong Zhao <sup>[c]</sup> and Zhuo Tang\*<sup>[a]</sup>

<sup>a</sup> Natural Products Research Center, Chengdu Institution of Biology, Chinese Academy of Science, Chengdu, Sichuan 610041(China)

<sup>b</sup> University of Chinese Academy of Sciences

<sup>c</sup> College of Art and Sciences, Shanxi Agricultural University, Taigu, Shanxi, 030800, China

### Content

|                                                                                     |    |
|-------------------------------------------------------------------------------------|----|
| General experimental procedures.....                                                | 2  |
| General procedure for the synthesis of <i>o</i> -PDAs.....                          | 3  |
| General procedure for the synthesis of primary $\alpha$ -hydroxy ketones .....      | 3  |
| General procedure for the synthesis of the racemic $\alpha$ - hydroxy ketones ..... | 4  |
| Optimizing the reaction conditions for the synthesis of THQ 3a.....                 | 5  |
| General procedure A for the synthesis of monosubstituted THQ 4.....                 | 6  |
| Optimizing the reaction conditions for synthesis of disubstituted THQ 5a .....      | 6  |
| General procedure B for synthesis of disubstituted THQ 5 .....                      | 8  |
| Investigation of the reaction mechanism by D <sub>2</sub> O NMR experiment.....     | 8  |
| X-ray results of the product .....                                                  | 9  |
| References.....                                                                     | 10 |
| Characteristic data for selected compounds.....                                     | 11 |
| HPLC spectrum.....                                                                  | 32 |
| NMR spectrum.....                                                                   | 69 |

## General experimental procedures

All reactions that required anhydrous or airless conditions were carried by standard procedures under nitrogen atmosphere. Commercially available reagents from Tansoole and Adamas-beta were used as received. The solvents were dried by distillation over the appropriate drying reagents.

$^1\text{H}$  NMR spectra were recorded on commercial instruments (400 MHz). Chemical shifts were reported in ppm from tetramethylsilane with the solvent resonance as the internal standard ( $\text{CDCl}_3$ ,  $\delta = 7.26$ ). Spectra were reported as follows: chemical shift ( $\delta$  ppm), multiplicity (s = singlet, d = doublet, t = triplet, q = quartet, m = multiplet), coupling constants (Hz), integration and, assignment.  $^{13}\text{C}$  NMR spectra were collected on commercial instruments (101 MHz) with complete proton decoupling. Chemical shifts are reported in ppm from the tetramethylsilane with the solvent resonance as internal standard ( $\text{CDCl}_3$ ,  $\delta = 77.0$ ). Mass spectra were recorded on ThermoQuest Finnigan LCQDECA system equipped with an ESI source. Enantiomeric excesses (*ee*) were determined by HPLC analysis using the corresponding commercial chiral column as stated in the experimental procedures at 30 °C with UV detector at 220 or 254 nm.

### General procedure for the synthesis of *o*-PDAs<sup>[1]</sup>

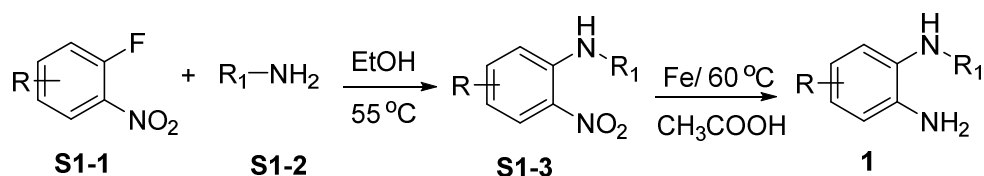

**Scheme S1 Method for preparation of the *o*-PDAs**

To a solution of EtOH (5.0 ml) was added a suspension of *o*-nitrofluorobenzene **S1-1** (10.0 mmol) and primary amine **S1-2** (35 mmol) at 55 °C. After stirring for 3 h at 55 °C, remove the EtOH under the vacuum. The product was extracted with ethyl ether (50 mL x 3), and the combined organic extracts were washed with brine and dried over Na<sub>2</sub>SO<sub>4</sub>. After removal of the solvents under reduced pressure, crude **S1-3** was obtained without further purification. **S1-3** was dissolved in CH<sub>3</sub>COOH (2 mL/mmol) with the addition of Fe (3.3 eq). The mixture was heated to 60 °C until the solution turns white. Quenched the reaction with sat. NaHCO<sub>3</sub> and extracted the product with EtOAc (50 mL x 3). The combined organic extracts were washed with brine and dried over Na<sub>2</sub>SO<sub>4</sub>. After removal of the solvents under reduced pressure, the residue was purified by flash column chromatography (hexane/EtOAc = 5/1 to 2/1) afforded substrate **1**.

### General procedure for the synthesis of primary $\alpha$ -hydroxy ketones<sup>[2]</sup>

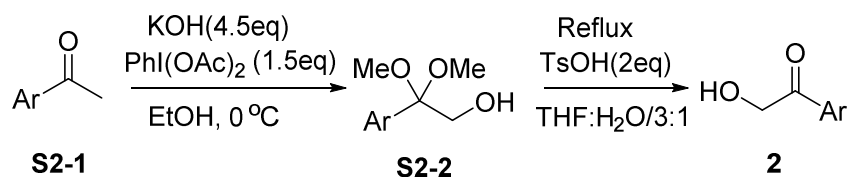

**Scheme S2 Method for preparation of the primary  $\alpha$ -hydroxyl ketones**

To a solution of KOH (112.5 mmol) in MeOH (150 mL) was added a suspension of ketone **S2-1** (25.0 mmol) in MeOH (50 mL) at 0 °C. Then PhI(OAc)<sub>2</sub> (37.5 mmol) was added portion wise. After stirring for 3 h at 0 °C, the reaction was quenched by the addition of water. Remove the MeOH under the vacuum. The product was extracted with EtOAc (50 mL x 3), and the combined organic extracts were washed with brine and dried over Na<sub>2</sub>SO<sub>4</sub>. After removal of the solvents under reduced pressure, crude **S2-2** was obtained as a white solid without further purification. **S2-2** was dissolved in THF: H<sub>2</sub>O (37.5 mL: 12.5 mL) with the addition of p-TsOH (46.5 mmol). The mixture was heated

to reflux for 4.5 h. monitored the reaction with TLC. Quenched the reaction with sat.  $\text{NaHCO}_3$  and extracted the product with EtOAc (50 mL x 3). The combined organic extracts were washed with brine and dried over  $\text{Na}_2\text{SO}_4$ . After removal of the solvents under reduced pressure, the residue was purified by flash column chromatography (hexane/EtOAc = 5/1 to 3/1) afforded substrate **2** as a white solid.

### General procedure for the synthesis of the racemic $\alpha$ -hydroxyl ketones<sup>[3]</sup>

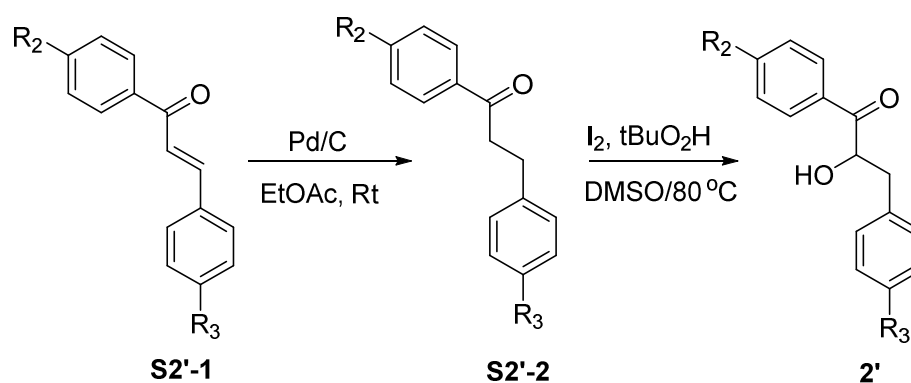

**Scheme S3 Method for preparation of the racemic  $\alpha$ -hydroxyl ketones**

The chalcone **S2'-1**, 10% Pd/C (an amount equal to  $\frac{1}{4}$  the quantity of the chalcone) and 30 mL of ethyl acetate were placed into the reactor. The reaction was conducted in room temperature for overnight and monitored by TLC using ethyl acetate as the solvent system. When the reaction was finished, the Pd/C was filtered, and the solvent was removed. In most cases, the crude product was purified by column chromatography using ethyl acetate/petroleum ether as the solvent system. All the compounds **S2'-2** without the spectrum data were obtained as pure products monitored by TLC, and the crude products **S2'-2** were directly used in the next step. Aryl ketones **S2'-2** (100 mg, 0.75 mmol), molecular iodine (0.5 equiv. 0.37 mmol) and TBHP (3 equiv. 2.23 mmol) in DMSO (1 mL) were stirred at  $80^\circ\text{C}$  (6-12 h) in a 5 ml round bottomed flask. After the completion of the reaction (monitored by TLC), added water (25 mL) and extracted with ethyl acetate (3 x 20 mL). The combined organic layer was washed with dilute sodium thiosulphate solution (10 mL, 5% aqueous solution) and water. The combined organic layer was dried over  $\text{Na}_2\text{SO}_4$  and concentrated under reduced pressure. The crude product was purified on a silica gel column using hexane/ EtOAc to get the pure product **2'**.

## Optimizing the reaction conditions for the synthesis of THQ 3a

Table S1: Optimizing the reaction conditions for synthesis of 3a

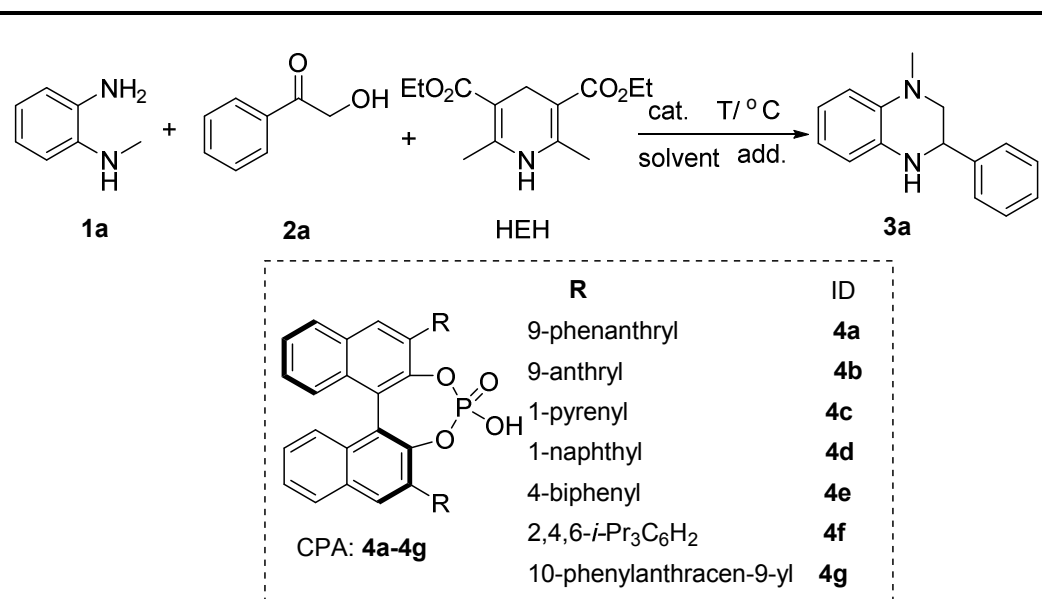

| Entry <sup>a</sup> | Sol.             | T/°C | Cat.      | Yield <sup>b</sup> (%) | Ee <sup>c</sup> (%) |
|--------------------|------------------|------|-----------|------------------------|---------------------|
| 1                  | PhMe             | 70   | <b>4a</b> | 70                     | 68                  |
| 2                  | PhMe             | 70   | <b>4b</b> | 65                     | 69                  |
| 3                  | PhMe             | 70   | <b>4c</b> | 55                     | 44                  |
| 4                  | PhMe             | 70   | <b>4d</b> | 68                     | 10                  |
| 5                  | PhMe             | 70   | <b>4e</b> | 58                     | 10                  |
| 6                  | PhMe             | 70   | <b>4f</b> | 62                     | 67                  |
| 7                  | PhMe             | 70   | <b>4g</b> | 56                     | 58                  |
| 8                  | <i>m</i> -xylene | 70   | <b>4a</b> | 72                     | 54                  |
| 9                  | Benzene          | 70   | <b>4a</b> | 66                     | 50                  |
| 10                 | PhCl             | 70   | <b>4a</b> | 75                     | 60                  |
| 11                 | PhMe             | 70   | <b>4a</b> | 60                     | 44                  |
| 12                 | PhMe             | 60   | <b>4a</b> | 50                     | 63                  |
| 13                 | PhMe             | 80   | <b>4a</b> | 68                     | 62                  |
| 14 <sup>d</sup>    | PhMe             | 65   | <b>4a</b> | 92                     | 80                  |

<sup>a</sup> All the reactions were carried out using **1a** (0.05 mmol), **2a** (0.05 mmol) and HEH (1.5 eq.) under nitrogen atmosphere in solvent (1 mL) for 16 h. <sup>b</sup> The reaction yield was calculated based on purification via silica column. <sup>c</sup> The ee value was calculated via HPLC with chiral column. <sup>d</sup> The reaction adding sequence was changed as following: The mixture of **1a** and **2a** was run at 110 °C for 2 h, then the reaction temperature was decreased to 65 °C followed by the addition of HEH, and the reaction mixture was further reacted for 16 h.

In the initial stage, the reaction catalyst was screened (Entries 1-7, Table S1). According to the reaction results, CPA **4a** was chosen as the optimal catalyst considering the reaction yield and ee

(Entry 1). Then the reaction solvent and the reaction temperature were screened, which demonstrated that better results could be obtained for the reaction proceeded in toluene at 65 °C. Then the reaction adding sequence was changed according to the reaction mechanism investigation result: the chirality of the reaction was formed via enantioselective transfer hydrogenation rather than enantioselective protonation. After the modification of the reaction adding sequence, both the reaction yield and the ee value were increased (Entry 14).

### General procedure A for the synthesis of monosubstituted THQ 3

0.05 mmol of **1**, 0.05 mmol of **2**, 5 mmol% **4a** and 50 mg 4 Å MS were reacted in 1 mL of toluene at 110 °C for 2 h. Then the reaction temperature was decreased to 65 °C and HEH (1.5 eq.) was added, and the reaction mixture was further run at 65 °C for 16 h. After the finish of the reaction, 10 mL saturated sodium sulfite solution was added and the reaction product was extracted with CH<sub>2</sub>Cl<sub>2</sub> (10 mL×2). Then the extractant was concentrated and purified with flash silica column eluted with CH<sub>2</sub>Cl<sub>2</sub>/petroleum ether (1:4-1:1).

### Optimizing the reaction conditions for synthesis of disubstituted THQ 5a

Table S2. Optimizing the reaction conditions for synthesis of 5a

| entry <sup>a</sup> | Sol.                         | T (°C) | Cat.      | Add.   | Yield (%) | Ee (%) |
|--------------------|------------------------------|--------|-----------|--------|-----------|--------|
| 1                  | PhMe                         | 85     | <b>4a</b> | 4 Å MS | 30        | 62     |
| 2                  | PhCl                         | 85     | <b>4a</b> | 4 Å MS | 45        | 72     |
| 3                  | 1,4-dioxane                  | 85     | <b>4a</b> | 4 Å MS | 35        | 44     |
| 4                  | MTBE                         | 85     | <b>4a</b> | 4 Å MS | 40        | 56     |
| 5                  | PhCl:n-hexane (1:1)          | 85     | <b>4a</b> | 4 Å MS | 44        | 64     |
| 6                  | PhCl:CHCl <sub>3</sub> (1:1) | 85     | <b>4a</b> | 4 Å MS | 45        | 70     |
| 7                  | PhCl:DCE (1:1)               | 85     | <b>4a</b> | 4 Å MS | 46        | 74     |
| 8                  | PhCl:DCE (1:1)               | 85     | <b>4a</b> | --     | 40        | 64     |
| 9                  | PhCl:DCE (1:1)               | 85     | <b>4a</b> | 3 Å MS | 38        | 74     |

|                 |                |     |           |                   |    |    |
|-----------------|----------------|-----|-----------|-------------------|----|----|
| 10              | PhCl:DCE (1:1) | 85  | <b>4a</b> | 5 Å MS            | 40 | 64 |
| 11              | PhCl:DCE (1:1) | 85  | <b>4a</b> | MgSO <sub>4</sub> | 35 | 62 |
| 12 <sup>b</sup> | PhCl:DCE (1:1) | 85  | <b>4a</b> | 4 Å MS            | 36 | 62 |
| 13 <sup>c</sup> | PhCl:DCE (1:1) | 85  | <b>4a</b> | 4 Å MS            | 45 | 78 |
| 14 <sup>d</sup> | PhCl:DCE (1:1) | 85  | <b>4a</b> | 4 Å MS            | 35 | 76 |
| 15 <sup>c</sup> | PhCl:DCE (1:1) | 85  | <b>4b</b> | 4 Å MS            | 40 | 80 |
| 16 <sup>c</sup> | PhCl:DCE (1:1) | 85  | <b>4c</b> | 4 Å MS            | 36 | 42 |
| 17 <sup>c</sup> | PhCl:DCE (1:1) | 85  | <b>4g</b> | 4 Å MS            | 42 | 80 |
| 18 <sup>c</sup> | PhCl:DCE (1:1) | 85  | <b>4f</b> | 4 Å MS            | 46 | 90 |
| 19 <sup>c</sup> | PhCl:DCE (1:1) | 95  | <b>4f</b> | 4 Å MS            | 40 | 88 |
| 20 <sup>c</sup> | PhCl:DCE (1:1) | 105 | <b>4f</b> | 4 Å MS            | 39 | 88 |

<sup>a</sup> All the reactions were carried out using **1b** (0.05 mmol), **2'a** (0.05 mmol) and HEH (1.5eq.) under nitrogen atmosphere in solvent (1 mL) for 16 h. <sup>b</sup> reaction proceeded in 0.5 mL solvent. <sup>c</sup> reaction proceeded in 1.5 mL solvent. <sup>d</sup> reaction proceeded in 2 mL solvent.

Considering the broad usage of THQ in pharmaceuticals, we optimized the reaction conditions for obtaining the disubstituted THQ. At the beginning, equal amount of *o*-PDA **1b** and racemic  $\alpha$ -hydroxyl ketone **2'a**, and 1.5 eq. of HEH were reacted in toluene at 85 °C. According to the result, the disubstituted THQ **5a** was obtained in excellent diastereoselectivity (99:1) with 30% yield and 62% ee (**Table S3**, Entry 1). Then we screened the reaction solvent (**Table S3**, Entries 2-4). The results demonstrated that PhCl was the optimal solvent (Entry 2). Then PhCl was chosen to mix with other solvent (Entries 5-7). The results demonstrated that the mixture of PhCl and DCE (1:1) was the optimal reaction solvent for higher ee (Entry 7). Next, different dehydration reagents were investigated (Entries 8-11). The results demonstrated that 4 Å molecular sieves was the optimal water drying reagent for both good yield and ee. Then, the effects of the concentration were studied (Entries 12-14), which indicated that 1.5 ml solvent was optimal for higher ee (Entry 13). Next, the reaction catalysts were screened (Entries 15-18), which demonstrated that TRIP **4f** was optimal for higher ee (Entry 18). Finally, the temperature was screened (Entries 19-20) which demonstrated that 85 °C was the optimal temperature. Based on the above results, the optimizing reaction conditions were summarized as following: equal amount of substrates and 1.5 eq. of HEH were reacted in 1.5 mL solvent (PhCl:DCE, 1:1) with 5 mol% of TRIP and 50 mg of 4 Å MS as additive at 85 °C under nitrogen atmosphere for 16 h. The disubstituted THQ **5a** was obtained in high diastereoselectivity (99:1) with high yield (46%) and good ee (90%).

## General procedure B for synthesis of disubstituted THQ 5

0.05 mmol of **1**, 0.05 mmol of **2'**, 5 mmol% TRIP and 50 mg 4 Å MS were reacted in 1.5 mL of PhCl and DCE (1:1) at 85 °C for 16 h. Then, 10 mL saturated sodium sulfite solution was added and the reaction product was extracted with CH<sub>2</sub>Cl<sub>2</sub> (10 mL×2). Then the extractant was concentrated and purified with flash silica column eluted with CH<sub>2</sub>Cl<sub>2</sub>/petroleum ether (1:4-1:1).

## Investigation of the reaction mechanism by D<sub>2</sub>O NMR experiment

For reactions with primary  $\alpha$ -hydroxyl ketone, The following D<sub>2</sub>O NMR experiments were done so as to ensure the reaction mechanism (Scheme S4). According to the results, the addition sequence of HEH was important for the reaction. When HEH was added at the beginning of the reaction, both of the hydrogens (C-2, C-3) were deuterated (Scheme S4a). However, when HEH was added after the formation of the dihydroquinoxaline ring, only the C2-H was deuterated (Scheme S4b). According to the above results, we modified the reaction conditions. The reductant HEH was added after mixing **1a** and **2a** at high temperature for 2 h. In this way, the ee value of **3a** could be improved because the chirality was formed by enantioselective transfer hydrogenation rather than protonation.

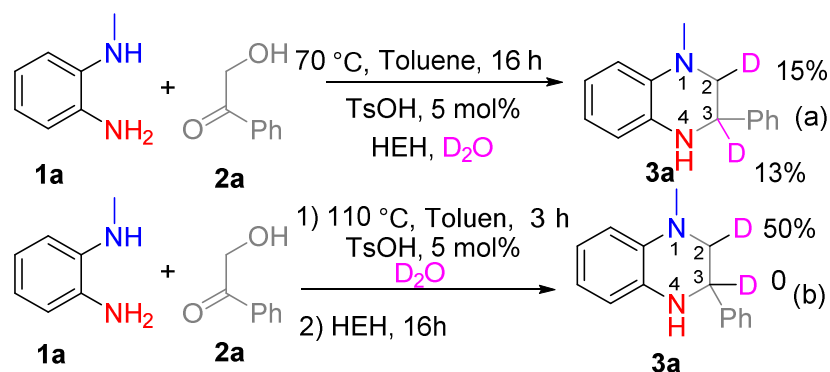

## Scheme S4 D<sub>2</sub>O NMR experiments for reactions with primary $\alpha$ -hydroxyl ketone as substrate

For reaction with racemic  $\alpha$ -hydroxyl ketone, the reaction mechanism was investigated with the following D<sub>2</sub>O NMR experiments (Scheme S5). According to the results, the C3-H was not deuterated for product **5a**, while both the C2-H and C5-H of product **5a** and **5a'** were deuterated (Scheme S5a). Therefore, we could conclude that the reaction proceeded by transfer hydrogenation of ketone imine rather than iminium ion. Meanwhile, ketone imine **5a'** was stable and could not isomerize into enamine under the reaction conditions according to the deuteration result (Scheme S5b).



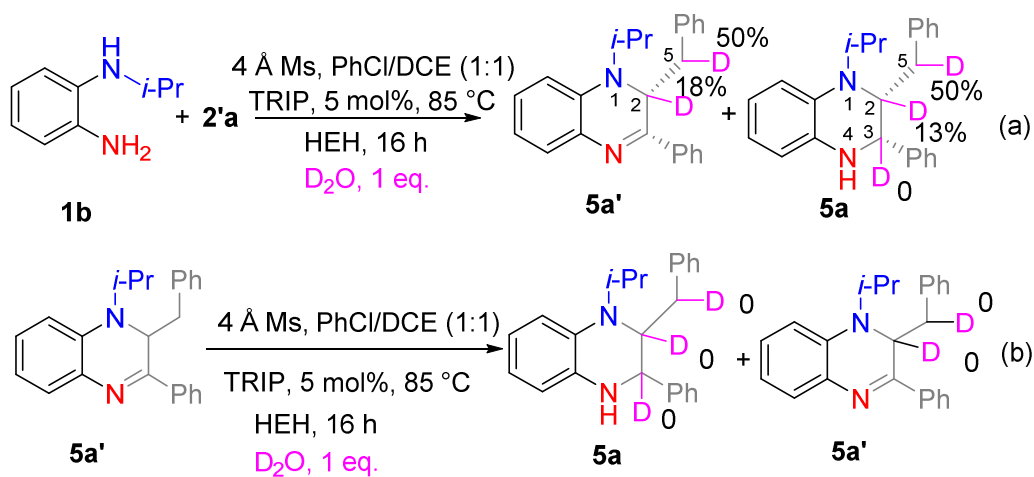

Scheme S5 D<sub>2</sub>O NMR experiments for reactions with racemic  $\alpha$ -hydroxyl ketone as substrate

### X-ray results of the product

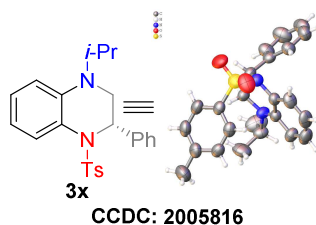

|                                       |                                                                 |
|---------------------------------------|-----------------------------------------------------------------|
| <b>Chemical formula</b>               | C <sub>24</sub> H <sub>26</sub> N <sub>2</sub> O <sub>2</sub> S |
| <b>Formula weight</b>                 | 406.53                                                          |
| <b>Space group</b>                    | P 21 21 21                                                      |
| <b>Hall group</b>                     | P 2ac 2ab                                                       |
| <b>Z</b>                              | 4                                                               |
| a/Å                                   | 8.1129(5)                                                       |
| b/Å                                   | 8.6639(5)                                                       |
| c/Å                                   | 31.0808(15)                                                     |
| $\alpha$ /°                           | 90                                                              |
| $\beta$ /°                            | 90                                                              |
| $\gamma$ /°                           | 90                                                              |
| Volume/Å <sup>3</sup>                 | 2184.6(2)                                                       |
| $\rho_{\text{calc}}$ /cm <sup>3</sup> | 1.236                                                           |
| Temperature/K                         | 293 K                                                           |
| Flack parameter                       | -0.02(6)                                                        |

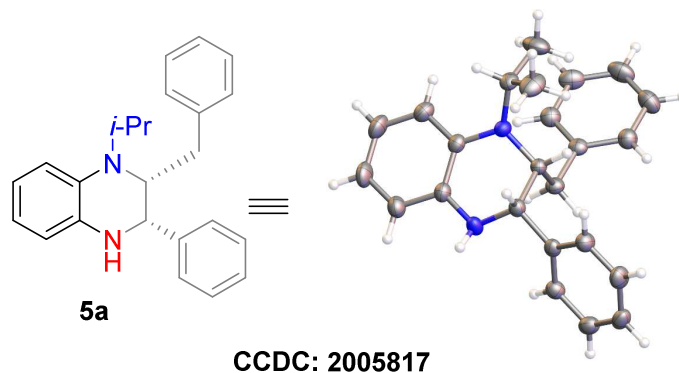

|                                    |                                                |
|------------------------------------|------------------------------------------------|
| <b>Chemical formula</b>            | C <sub>24</sub> H <sub>26</sub> N <sub>2</sub> |
| <b>Formula weight</b>              | 342.47                                         |
| <b>Space group</b>                 | P 21 21 21                                     |
| <b>Hall group</b>                  | P 2ac 2ab                                      |
| <b>Z</b>                           | 4                                              |
| a/Å                                | 7.63264(7)                                     |
| b/Å                                | 13.82175(12)                                   |
| c/Å                                | 18.09078(15)                                   |
| α/°                                | 90                                             |
| β/°                                | 90                                             |
| γ/°                                | 90                                             |
| Volume/Å <sup>3</sup>              | 1908.51(3)                                     |
| ρ <sub>calc</sub> /cm <sup>3</sup> | 1.192                                          |
| Temperature/K                      | 180K                                           |
| Flack parameter                    | -0.2(2)                                        |

## References

- (1) Mukhina, O. A.; Kuznetsov, D. M.; Cowger, T. M.; Kutateladze, A. G. Amino Azaxyllylenes Photogenerated from o-Amido Imines: Photoassisted Access to Complex Spiro-Poly-Heterocycles. *Angew. Chem., Int. Ed.* **2015**, *54*, 11516-11520.
- (2) Wang, H.-Y.; Yang, K.; Bennett, S. R.; Guo, S.-r.; Tang, W. Iridium-Catalyzed Dynamic Kinetic Isomerization: Expedient Synthesis of Carbohydrates from Achmatowicz Rearrangement Products. *Angew. Chem., Int. Ed.* **2015**, *54*, 8756-8759.
- (3) Liang, Y.-F.; Wu, K.; Song, S.; Li, X.; Huang, X.; Jiao, N. I<sub>2</sub>- or NBS-Catalyzed Highly Efficient α-Hydroxylation of Ketones with Dimethyl Sulfoxide. *Org. Lett.* **2015**, *17*, 876-879.

## Characteristic data for selected compounds

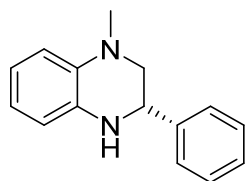

**(S)-1-methyl-3-phenyl-1,2,3,4-tetrahydroquinoxaline (3a):** White oil (10.3 mg, yield 92%), with 80% ee (HPLC, Diacel Chiralcel AD-H column 95:5 hexanes/2-propanol, 1 mL/min, 254 nm;  $t_R = 9.888$  min;  $[\alpha]_D^{25} = +22^\circ$  (c 0.01,  $\text{CH}_2\text{Cl}_2$ ).

**$^1\text{H}$  NMR (400 MHz,  $\text{CDCl}_3$ )**  $\delta$  7.46 – 7.31 (m, 5H), 6.84 – 6.51 (m, 4H), 4.64 (dd,  $J = 8.2, 3.1$  Hz, 1H), 3.98 (s, 1H), 3.38 – 3.18 (m, 2H), 2.91 (s, 3H).

**$^{13}\text{C}$  NMR (101 MHz,  $\text{CDCl}_3$ )**  $\delta$  141.76, 135.48, 134.64, 128.65, 127.95, 127.02, 118.89, 118.32, 113.43, 111.76, 57.63, 54.70, 39.10.

**HRMS (ESI):**  $\text{C}_{15}\text{H}_{16}\text{N}_2$  Neutral mass: 224.1313, Observed ( $[\text{M}+\text{H}]^+$ ): 225.1384.

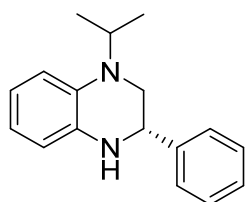

**(S)-1-isopropyl-3-phenyl-1,2,3,4-tetrahydroquinoxaline (3b):** Yellow oil (11.8 mg, yield 95%), with 94% ee (HPLC, Diacel Chiralcel AD-H column 95:5 hexanes/2-propanol, 1 mL/min, 254 nm;  $t_R = 6.785$  min;  $[\alpha]_D^{25} = +33^\circ$  (c 0.01,  $\text{CH}_2\text{Cl}_2$ ).

**$^1\text{H}$  NMR (400 MHz,  $\text{CDCl}_3$ )**  $\delta$  7.46 – 7.37 (m, 4H), 7.37 – 7.32 (m, 1H), 6.75 (dd,  $J = 3.3, 1.6$  Hz, 2H), 6.61 (q,  $J = 4.3$  Hz, 2H), 4.47 (dd,  $J = 8.3, 3.1$  Hz, 1H), 4.12 (dt,  $J = 13.2, 6.6$  Hz, 1H), 3.97 (s, 1H), 3.40 (dd,  $J = 11.3, 3.2$  Hz, 1H), 3.05 (dd,  $J = 11.3, 8.3$  Hz, 1H), 1.24 (d,  $J = 6.6$  Hz, 3H), 1.10 (d,  $J = 6.6$  Hz, 3H).

**$^{13}\text{C}$  NMR (101 MHz,  $\text{CDCl}_3$ )**  $\delta$  142.26, 134.79, 134.23, 128.59, 127.86, 127.03, 118.94, 117.26, 113.98, 111.40, 55.00, 47.00, 46.75, 19.35, 17.94.

**HRMS (ESI):**  $\text{C}_{17}\text{H}_{20}\text{N}_2$  Neutral mass: 252.1626, Observed ( $[\text{M}+\text{H}]^+$ ): 253.1678.

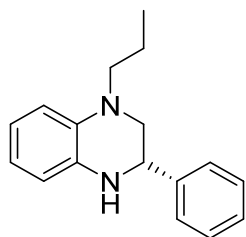

**(S)-3-phenyl-1-propyl-1,2,3,4-tetrahydroquinoxaline (3c):** Yellow oil (11.6 mg, yield 92%), with 90% ee (HPLC, Diacel Chiralcel AD-H column 95:5 hexanes/2-propanol, 1 mL/min, 254 nm;  $t_R = 6.372$  min;  $[\alpha]_D^{25} = +72^\circ$  (c 0.02,  $\text{CH}_2\text{Cl}_2$ ).

**$^1\text{H}$  NMR (400 MHz,  $\text{CDCl}_3$ )**  $\delta$  7.49 – 7.40 (m, 4H), 7.40 – 7.33 (m, 1H), 6.77 (dd,  $J = 9.9, 4.1$  Hz, 1H), 6.70 – 6.59 (m, 3H), 4.52 (t,  $J = 5.7$  Hz, 1H), 3.96 (s, 1H), 3.38 (d,  $J = 5.7$  Hz, 3H), 3.25 – 3.09 (m, 1H), 1.77 – 1.57 (m, 2H), 0.98 (t,  $J = 7.4$  Hz, 3H).

**$^{13}\text{C}$  NMR (101 MHz,  $\text{CDCl}_3$ )**  $\delta$  141.78, 134.32, 128.66, 127.94, 127.11, 119.21, 117.16, 114.02, 111.32, 55.86, 54.19, 53.36, 19.37, 11.66.

**HRMS (ESI):**  $\text{C}_{17}\text{H}_{20}\text{N}_2$  Neutral mass: 252.1626, Observed ( $[\text{M}+\text{H}]^+$ ): 253.1693.

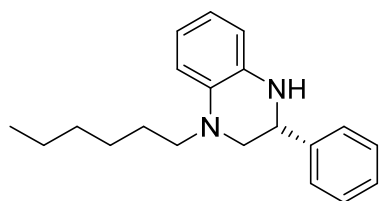

**(S)-1-hexyl-3-phenyl-1,2,3,4-tetrahydroquinoxaline (3d):** Yellow oil (13.8 mg, yield 94%), with 90% ee (HPLC, Diacel Chiralcel AD-H column 95:5 hexanes/2-propanol, 1 mL/min, 254 nm;  $t_R = 5.997$  min;  $[\alpha]_D^{25} = +48^\circ$  (c 0.01,  $\text{CH}_2\text{Cl}_2$ ).

**$^1\text{H}$  NMR (400 MHz,  $\text{CDCl}_3$ )**  $\delta$  8.34 (dd,  $J = 6.5, 2.9$  Hz, 2H), 7.99 (d,  $J = 7.9$  Hz, 1H), 7.60 (t,  $J = 7.4$  Hz, 1H), 7.54 – 7.48 (m, 3H), 7.42 – 7.34 (m, 2H), 4.42 – 4.27 (m, 2H), 1.83 (dt,  $J = 15.6, 7.7$  Hz, 2H), 1.52 (dd,  $J = 14.6, 7.1$  Hz, 2H), 1.48 – 1.33 (m, 5H), 0.93 (t,  $J = 6.9$  Hz, 4H).

**$^{13}\text{C}$  NMR (101 MHz,  $\text{CDCl}_3$ )**  $\delta$  141.82, 134.33, 128.65, 127.93, 127.11, 119.21, 117.15, 114.00, 111.30, 55.77, 54.23, 51.56, 31.78, 26.99, 26.01, 22.71, 14.12.

**HRMS (ESI):**  $\text{C}_{20}\text{H}_{26}\text{N}_2$  Neutral mass: 294.2096, Observed ( $[\text{M}+\text{H}]^+$ ): 295.2140.

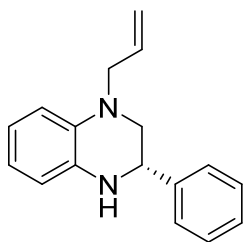

**(S)-1-allyl-3-phenyl-1,2,3,4-tetrahydroquinoxaline (3e):** Yellow oil (11.9 mg, yield 95%), with 82% ee (HPLC, Diacel Chiralcel AD-H column 95:5 hexanes/2-propanol, 1 mL/min, 254 nm;  $t_R = 7.560$  min;  $[\alpha]_D^{25} = +21^\circ$  (c 0.01,  $\text{CH}_2\text{Cl}_2$ ).

**$^1\text{H}$  NMR (400 MHz,  $\text{CDCl}_3$ )**  $\delta$  7.52 – 7.32 (m, 5H), 6.82 – 6.57 (m, 4H), 5.91 (ddd,  $J = 22.5, 10.5, 5.4$  Hz, 1H), 5.23 (ddd,  $J = 13.7, 11.7, 1.5$  Hz, 2H), 4.54 (dd,  $J = 7.7, 4.0$  Hz, 1H), 4.00 (dd,  $J = 16.5, 5.2$  Hz, 2H), 3.83 (dd,  $J = 16.5, 5.5$  Hz, 1H), 3.45 – 3.25 (m, 2H).

**$^{13}\text{C}$  NMR (101 MHz,  $\text{CDCl}_3$ )**  $\delta$  141.69, 134.49, 134.19, 133.52, 128.66, 127.96, 127.09, 119.09, 117.83, 116.86, 113.97, 112.01, 55.38, 54.36, 54.05

**HRMS (ESI):**  $\text{C}_{17}\text{H}_{18}\text{N}_2$  Neutral mass: 250.1470, Observed ( $[\text{M}+\text{H}]^+$ ): 251.1491.

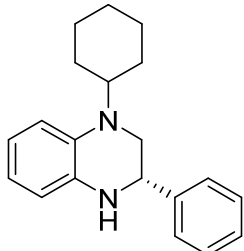

**(S)-1-cyclohexyl-3-phenyl-1,2,3,4-tetrahydroquinoxaline (3f):** Yellow oil (14.1 mg, yield 97%), with 98% ee (HPLC, Diacel Chiralcel AD-H column 95:5 hexanes/2-propanol, 1 mL/min, 254 nm;  $t_R = 9.418$  min;  $[\alpha]_D^{25} = +78^\circ$  (c 0.01,  $\text{CH}_2\text{Cl}_2$ ).

**$^1\text{H}$  NMR (400 MHz,  $\text{CDCl}_3$ )**  $\delta$  7.43 (dd,  $J = 8.2, 5.6$  Hz, 4H), 7.40 – 7.33 (m, 1H), 6.76 (d,  $J = 6.6$  Hz, 2H), 6.63 (s, 2H), 4.46 (d,  $J = 5.3$  Hz, 1H), 3.97 (s, 1H), 3.64 (t,  $J = 9.6$  Hz, 1H), 3.48 (d,  $J = 10.3$  Hz, 1H), 3.19 – 3.07 (m, 1H), 1.89 (dd,  $J = 24.8, 11.8$  Hz, 4H), 1.75 (d,  $J = 13.1$  Hz, 1H), 1.60 – 1.26 (m, 5H).

**$^{13}\text{C}$  NMR (101 MHz,  $\text{CDCl}_3$ )**  $\delta$  142.26, 134.76, 134.23, 128.60, 127.86, 127.07, 119.00, 117.11, 114.12, 111.37, 56.17, 55.05, 48.62, 29.88, 28.86, 26.30, 26.16, 26.09.

**HRMS (ESI):** C<sub>20</sub>H<sub>24</sub>N<sub>2</sub> Neutral mass: 292.1939, Observed ([M+H])<sup>+</sup>: 293.2033.

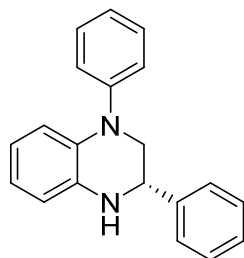

**(S)-1,3-diphenyl-1,2,3,4-tetrahydroquinoxaline (3g):** Yellow oil (13.7 mg, yield 96%), with 92% ee (HPLC, Diacel Chiralcel AD-H column 95:5 hexanes/2-propanol, 1 mL/min, 254 nm; t<sub>R</sub> = 11.742 min; [α]<sub>D</sub><sup>25</sup> = +53° (c 0.01, CH<sub>2</sub>Cl<sub>2</sub>).

**<sup>1</sup>H NMR (400 MHz, CDCl<sub>3</sub>)** δ 7.53 – 7.32 (m, 7H), 7.25 (d, *J* = 7.6 Hz, 2H), 7.15 – 6.92 (m, 2H), 6.75 (dd, *J* = 32.9, 26.2 Hz, 3H), 4.56 (s, 1H), 4.20 (s, 1H), 3.88 (s, 1H), 3.60 (s, 1H).

**<sup>13</sup>C NMR (101 MHz, CDCl<sub>3</sub>)** δ 147.98, 141.08, 135.78, 130.95, 129.29, 128.75, 128.07, 127.06, 122.91, 122.62, 120.80, 118.10, 117.47, 114.86, 55.99, 54.04.

**HRMS (ESI):** C<sub>20</sub>H<sub>18</sub>N<sub>2</sub> Neutral mass: 286.1470, Observed ([M+H])<sup>+</sup>: 287.1546.

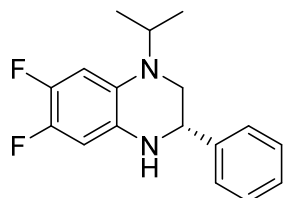

**(S)-6,7-difluoro-1-isopropyl-3-phenyl-1,2,3,4-tetrahydroquinoxaline (3h):** Yellow oil (13.4 mg, yield 93%), with 84% ee (HPLC, Diacel Chiralcel AD-H column 95:5 hexanes/2-propanol, 1 mL/min, 254 nm; t<sub>R</sub> = 8.617 min; [α]<sub>D</sub><sup>25</sup> = +48° (c 0.01, CH<sub>2</sub>Cl<sub>2</sub>).

**<sup>1</sup>H NMR (400 MHz, CDCl<sub>3</sub>)** δ 7.52 – 7.32 (m, 5H), 6.50 (dd, *J* = 13.5, 7.6 Hz, 1H), 6.38 (dd, *J* = 11.4, 7.9 Hz, 1H), 4.41 (dd, *J* = 8.2, 2.9 Hz, 1H), 3.93 (dt, *J* = 19.5, 6.4 Hz, 2H), 3.35 (dd, *J* = 11.4, 3.0 Hz, 1H), 2.99 (dd, *J* = 11.3, 8.4 Hz, 1H), 1.22 (d, *J* = 6.6 Hz, 3H), 1.08 (d, *J* = 6.5 Hz, 3H).

**<sup>13</sup>C NMR (101 MHz, CDCl<sub>3</sub>)** δ 141.59, 140.77, 140.64, 130.65 (dd, *J* = 8.08 Hz, 2.02 Hz), 130.42 (dd, *J* = 8.08 Hz, 2.02 Hz), 128.69, 128.08, 126.94, 101.43 (d, *J* = 179.78 Hz), 101.22, 130.65 (d, *J* = 180.79 Hz), 54.96, 47.53, 46.62, 19.24, 17.68.

$^{19}\text{F}\{^1\text{H}\}$  NMR (376 MHz,  $\text{CDCl}_3$ )  $\delta$  -150.95 (d,  $J$  = 22.6), -133.36 (d,  $J$  = 22.6).

HRMS (ESI):  $\text{C}_{17}\text{H}_{18}\text{F}_2\text{N}_2$  Neutral mass: 288.1438, Observed ( $[\text{M}+\text{H}]^+$ ): 289.1456.

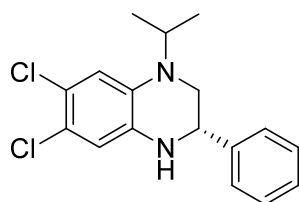

**(S)-6,7-dichloro-1-isopropyl-3-phenyl-1,2,3,4-tetrahydroquinoxaline (3i):** Yellow oil (15.2 mg, yield 95%), with 94% ee (HPLC, Diacel Chiralcel AD-H column 95:5 hexanes/2-propanol, 1 mL/min, 254 nm;  $t_{\text{R}}$  = 9.572 min;  $[\alpha]_{\text{D}}^{25} = +61^\circ$  (c 0.01,  $\text{CH}_2\text{Cl}_2$ ).

$^1\text{H}$  NMR (400 MHz,  $\text{CDCl}_3$ )  $\delta$  7.45 – 7.32 (m, 5H), 6.71 (s, 1H), 6.61 (s, 1H), 4.42 (dd,  $J$  = 7.7, 2.6 Hz, 1H), 3.98 (dt,  $J$  = 13.0, 6.5 Hz, 2H), 3.36 (dd,  $J$  = 11.3, 2.8 Hz, 1H), 3.01 (dd,  $J$  = 11.3, 8.1 Hz, 1H), 1.22 (d,  $J$  = 6.6 Hz, 3H), 1.07 (d,  $J$  = 6.6 Hz, 3H).

$^{13}\text{C}$  NMR (101 MHz,  $\text{CDCl}_3$ )  $\delta$  141.40, 134.49, 133.99, 128.72, 128.15, 126.88, 120.84, 119.00, 114.06, 112.09, 54.69, 47.17, 46.30, 19.11, 17.89.

HRMS (ESI):  $\text{C}_{17}\text{H}_{18}\text{Cl}_2\text{N}_2$  Neutral mass: 320.0847, Observed ( $[\text{M}+\text{H}]^+$ ): 321.0919.

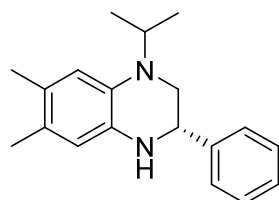

**(S)-1-isopropyl-6,7-dimethyl-3-phenyl-1,2,3,4-tetrahydroquinoxaline (3j):** Yellow oil (12.7 mg, yield 91%), with 94% ee (HPLC, Diacel Chiralcel AD-H column 95:5 hexanes/2-propanol, 1 mL/min, 254 nm;  $t_{\text{R}}$  = 10.425 min;  $[\alpha]_{\text{D}}^{25} = +43^\circ$  (c 0.01,  $\text{CH}_2\text{Cl}_2$ ).

$^1\text{H}$  NMR (400 MHz,  $\text{CDCl}_3$ )  $\delta$  7.51 – 7.32 (m, 5H), 6.56 (s, 1H), 6.43 (s, 1H), 4.43 (dd,  $J$  = 8.0, 2.4 Hz, 1H), 4.16 – 4.03 (m, 2H), 3.83 (s, 1H), 3.34 (d,  $J$  = 13.7 Hz, 1H), 3.00 (dd,  $J$  = 10.9, 8.5 Hz, 1H), 2.21 (s, 3H), 2.15 (s, 3H), 1.22 (d,  $J$  = 6.6 Hz, 3H), 1.09 (d,  $J$  = 6.5 Hz, 3H).

$^{13}\text{C}$  NMR (101 MHz,  $\text{CDCl}_3$ )  $\delta$  142.56, 132.66, 132.11, 128.54, 127.76, 127.05, 126.28, 124.87, 115.83, 113.39, 55.25, 47.27, 46.86, 19.45, 18.74, 17.87.

**HRMS (ESI):** C<sub>19</sub>H<sub>24</sub>N<sub>2</sub> Neutral mass: 280.1939, Observed ([M+Na]<sup>+</sup>): 303.1851.

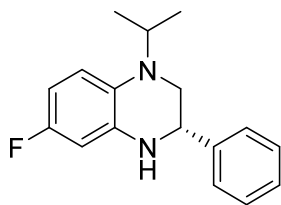

**(S)-6-fluoro-1-isopropyl-3-phenyl-1,2,3,4-tetrahydroquinoxaline (3k):** Yellow oil (11.5 mg, yield 85%), with 86% ee (HPLC, Diacel Chiralcel AD-H column 95:5 hexanes/2-propanol, 1 mL/min, 254 nm; *t<sub>R</sub>* = 8.768 min; [ $\alpha$ ]<sub>D</sub><sup>25</sup> = +44° (c 0.01, CH<sub>2</sub>Cl<sub>2</sub>).

**<sup>1</sup>H NMR (400 MHz, CDCl<sub>3</sub>)**  $\delta$  7.48 – 7.31 (m, 5H), 6.62 (dd, *J* = 8.7, 5.3 Hz, 1H), 6.46 – 6.30 (m, 2H), 4.51 (d, *J* = 5.5 Hz, 1H), 4.03 (dt, *J* = 13.0, 6.1 Hz, 2H), 3.36 (d, *J* = 11.0 Hz, 1H), 2.97 (d, *J* = 19.4 Hz, 1H), 1.24 (d, *J* = 6.6 Hz, 3H), 1.07 (d, *J* = 6.5 Hz, 3H).

**<sup>13</sup>C NMR (101 MHz, CDCl<sub>3</sub>)**  $\delta$  156.02 (d, *J* = 234.32 Hz), 141.92, 136.02 (d, *J* = 10.10 Hz), 130.29 (d, *J* = 3.03 Hz), 128.65, 127.98, 126.93, 112.06 (d, *J* = 9.09 Hz), 103.75 (d, *J* = 22.22 Hz), 100.76 (d, *J* = 26.26 Hz), 55.29, 47.29, 46.73, 19.43, 17.57.

**<sup>19</sup>F{<sup>1</sup>H} NMR (376 MHz, CDCl<sub>3</sub>)**  $\delta$  -127.28.

**HRMS (ESI):** C<sub>17</sub>H<sub>19</sub>FN<sub>2</sub> Neutral mass: 270.1532, Observed ([M+H]<sup>+</sup>): 271.1605.

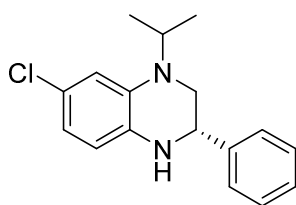

**(S)-7-chloro-1-isopropyl-3-phenyl-1,2,3,4-tetrahydroquinoxaline (3l):** Yellow oil (13.1 mg, yield 92%), with 94% ee (HPLC, Diacel Chiralcel AD-H column 95:5 hexanes/2-propanol, 1 mL/min, 254 nm; *t<sub>R</sub>* = 9.077 min; [ $\alpha$ ]<sub>D</sub><sup>25</sup> = +52° (c 0.01, CH<sub>2</sub>Cl<sub>2</sub>).

**<sup>1</sup>H NMR (400 MHz, CDCl<sub>3</sub>)**  $\delta$  7.47 – 7.33 (m, 5H), 6.69 (s, 1H), 6.56 (d, *J* = 7.1 Hz, 1H), 6.49 (d, *J* = 8.1 Hz, 1H), 4.41 (d, *J* = 5.6 Hz, 1H), 4.05 (dt, *J* = 13.2, 6.5 Hz, 1H), 3.98 (s, 1H), 3.40 (d, *J* = 13.3 Hz, 1H), 3.13 – 2.98 (m, 1H), 1.24 (d, *J* = 6.5 Hz, 3H), 1.11 (d, *J* = 6.5 Hz, 3H).

**<sup>13</sup>C NMR (101 MHz, CDCl<sub>3</sub>)**  $\delta$  141.80, 135.27, 133.25, 128.68, 128.04, 127.01, 123.74, 116.37, 114.31, 111.03, 54.72, 46.97, 46.68, 19.18, 18.07.



**HRMS (ESI):**C<sub>17</sub>H<sub>19</sub>ClN<sub>2</sub> Neutral mass: 286.1237, Observed ([M+H]<sup>+</sup>): 287.1296.

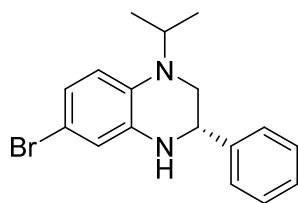

**(S)-6-bromo-1-isopropyl-3-phenyl-1,2,3,4-tetrahydroquinoxaline (3m):** Yellow oil (14.3 mg, yield 87%), with 92% ee (HPLC, Diacel Chiralcel AD-H column 95:5 hexanes/2-propanol, 1 mL/min, 254 nm;  $t_R$  = 11.585 min;  $[\alpha]_D^{25} = +42^\circ$  (c 0.01, CH<sub>2</sub>Cl<sub>2</sub>).

**<sup>1</sup>H NMR (400 MHz, CDCl<sub>3</sub>)**  $\delta$  7.47 – 7.32 (m, 5H), 6.81 (dd,  $J$  = 8.6, 2.1 Hz, 1H), 6.69 (d,  $J$  = 2.2 Hz, 1H), 6.58 (d,  $J$  = 8.7 Hz, 1H), 4.47 (dd,  $J$  = 7.9, 3.0 Hz, 1H), 4.04 (dt,  $J$  = 13.1, 6.5 Hz, 2H), 3.37 (dd,  $J$  = 11.4, 3.0 Hz, 1H), 3.01 (dd,  $J$  = 11.3, 8.1 Hz, 1H), 1.23 (d,  $J$  = 6.6 Hz, 3H), 1.08 (d,  $J$  = 6.6 Hz, 3H).

**<sup>13</sup>C NMR (101 MHz, CDCl<sub>3</sub>)**  $\delta$  141.79, 136.27, 133.33, 128.69, 128.04, 126.95, 121.03, 116.02, 112.61, 108.97, 54.90, 46.97, 46.59, 19.25, 17.8.

**HRMS (ESI):**C<sub>17</sub>H<sub>19</sub>BrN<sub>2</sub> Neutral mass: 330.0732, Observed ([M+H]<sup>+</sup>): 331.0791.

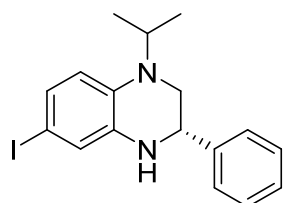

**(S)-6-iodo-1-isopropyl-3-phenyl-1,2,3,4-tetrahydroquinoxaline (3n):** Yellow oil (17.0 mg, yield 90%), with 88% ee (HPLC, Diacel Chiralcel AD-H column 95:5 hexanes/2-propanol, 1 mL/min, 254 nm;  $t_R$  = 11.600 min;  $[\alpha]_D^{25} = +28^\circ$  (c 0.01, CH<sub>2</sub>Cl<sub>2</sub>).

**<sup>1</sup>H NMR (400 MHz, CDCl<sub>3</sub>)**  $\delta$  7.45 – 7.32 (m, 5H), 6.99 (d,  $J$  = 8.4 Hz, 1H), 6.85 (s, 1H), 6.48 (d,  $J$  = 8.5 Hz, 1H), 4.45 (dd,  $J$  = 7.7, 2.3 Hz, 1H), 4.08 – 3.96 (m, 2H), 3.38 (dd,  $J$  = 11.4, 2.6 Hz, 1H), 3.01 (dd,  $J$  = 11.2, 8.2 Hz, 1H), 1.22 (d,  $J$  = 6.6 Hz, 3H), 1.07 (d,  $J$  = 6.5 Hz, 3H).

**<sup>13</sup>C NMR (101 MHz, CDCl<sub>3</sub>)**  $\delta$  141.74, 136.60, 134.05, 128.67, 128.05, 127.31, 126.95, 126.46, 121.64, 113.18, 54.77, 46.88, 46.59, 38.80, 19.23, 17.94.

**HRMS (ESI):**C<sub>17</sub>H<sub>19</sub>IN<sub>2</sub> Neutral mass: 378.0593, Observed ([M+H]<sup>+</sup>): 379.0656.

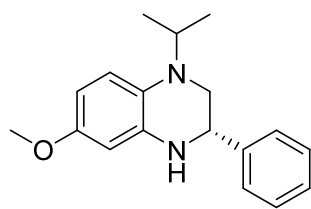

**(S)-1-isopropyl-6-methoxy-3-phenyl-1,2,3,4-tetrahydroquinoxaline (3o):** Yellow oil (11.8 mg, yield 85%), with 92% ee (HPLC, Diacel Chiralcel AD-H column 95:5 hexanes/2-propanol, 1 mL/min, 254 nm;  $t_R = 16.408$  min;  $[\alpha]_D^{25} = +46^\circ$  (c 0.01,  $\text{CH}_2\text{Cl}_2$ ).

**$^1\text{H}$  NMR (400 MHz,  $\text{CDCl}_3$ )**  $\delta$  7.40 (dd,  $J = 8.7, 5.2$  Hz, 4H), 7.37 – 7.31 (m, 1H), 6.66 (d,  $J = 8.7$  Hz, 1H), 6.32 (dd,  $J = 8.7, 2.3$  Hz, 1H), 6.25 (d,  $J = 2.7$  Hz, 1H), 4.51 (dd,  $J = 8.1, 2.7$  Hz, 1H), 4.02 (dt,  $J = 13.0, 6.5$  Hz, 2H), 3.77 (s, 3H), 3.34 (dd,  $J = 11.3, 2.7$  Hz, 1H), 2.96 (dd,  $J = 11.1, 8.4$  Hz, 1H), 1.23 (d,  $J = 6.6$  Hz, 3H), 1.08 (d,  $J = 6.5$  Hz, 3H).

**$^{13}\text{C}$  NMR (101 MHz,  $\text{CDCl}_3$ )**  $\delta$  152.36, 142.30, 136.15, 128.51, 127.84, 126.98, 112.74, 102.90, 100.82, 55.53, 47.23, 19.55, 17.53.

**HRMS (ESI):** $\text{C}_{18}\text{H}_{22}\text{N}_2\text{O}$  Neutral mass: 282.1732, Observed ( $[\text{M}+\text{Na}]^+$ ): 305.1650.

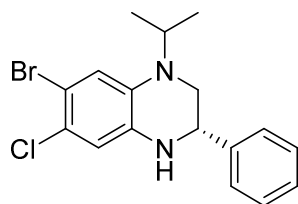

**(S)-7-bromo-6-chloro-1-isopropyl-3-phenyl-1,2,3,4-tetrahydroquinoxaline (3p):** Yellow oil (17.3 mg, yield 95%), with 92% ee (HPLC, Diacel Chiralcel AD-H column 95:5 hexanes/2-propanol, 1 mL/min, 254 nm;  $t_R = 10.568$  min;  $[\alpha]_D^{25} = +56^\circ$  (c 0.01,  $\text{CH}_2\text{Cl}_2$ ).

**$^1\text{H}$  NMR (400 MHz,  $\text{CDCl}_3$ )**  $\delta$  7.45 – 7.32 (m, 5H), 6.85 (s, 1H), 6.63 (s, 1H), 4.43 (dd,  $J = 7.8, 3.0$  Hz, 1H), 4.06 (s, 1H), 3.97 (dq,  $J = 13.2, 6.6$  Hz, 1H), 3.36 (dd,  $J = 11.5, 3.1$  Hz, 1H), 3.00 (dd,  $J = 11.4, 7.9$  Hz, 1H), 1.22 (d,  $J = 6.6$  Hz, 3H), 1.07 (d,  $J = 6.6$  Hz, 3H).

**$^{13}\text{C}$  NMR (101 MHz,  $\text{CDCl}_3$ )**  $\delta$  141.38, 135.12, 134.16, 128.72, 128.15, 126.87, 121.09, 115.02, 113.98, 109.65, 54.67, 47.15, 46.24, 19.10, 17.90.

**HRMS (ESI):** $\text{C}_{17}\text{H}_{18}\text{BrClN}_2$  Neutral mass: 364.0342, Observed ( $[\text{M}+\text{H}]^+$ ): 365.0395.

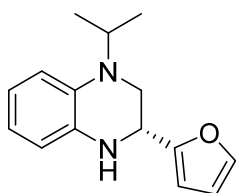

**(S)-3-(furan-2-yl)-1-isopropyl-1,2,3,4-tetrahydroquinoline (3q):** Yellow oil (11.8 mg, yield 98%), with 90% ee (HPLC, Diacel Chiralcel OD-H column 90:10 hexanes/2-propanol, 1 mL/min, 254 nm;  $t_R = 7.417$  min;  $[\alpha]_D^{25} = +38^\circ$  (c 0.01,  $\text{CH}_2\text{Cl}_2$ ).

**$^1\text{H}$  NMR (400 MHz,  $\text{CDCl}_3$ )**  $\delta$  7.41 (d,  $J = 1.0$  Hz, 1H), 6.79 – 6.69 (m, 2H), 6.66 – 6.57 (m, 2H), 6.38 (dd,  $J = 3.1, 1.8$  Hz, 1H), 6.28 (d,  $J = 3.2$  Hz, 1H), 4.64 (dd,  $J = 7.2, 3.0$  Hz, 1H), 4.11 (dt,  $J = 13.2, 6.6$  Hz, 1H), 4.02 (s, 1H), 3.49 (dd,  $J = 11.2, 3.1$  Hz, 1H), 3.28 (dd,  $J = 11.2, 7.3$  Hz, 1H), 1.24 (d,  $J = 6.6$  Hz, 3H), 1.14 (d,  $J = 6.6$  Hz, 3H).

**$^{13}\text{C}$  NMR (101 MHz,  $\text{CDCl}_3$ )**  $\delta$  155.26, 141.70, 134.40, 133.57, 119.29, 117.39, 114.42, 111.47, 110.38, 105.91, 49.22, 46.72, 43.50, 19.07, 18.27.

**HRMS (ESI):**  $\text{C}_{15}\text{H}_{18}\text{N}_2\text{O}$  Neutral mass: 242.1419, Observed ( $[\text{M}+\text{H}]^+$ ): 243.1428.

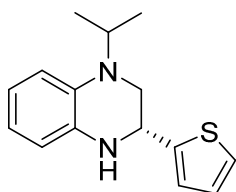

**(S)-1-isopropyl-3-(thiophen-2-yl)-1,2,3,4-tetrahydroquinoline (3r):** Yellow oil (12.3 mg, yield 96%), with 92% ee (HPLC, Diacel Chiralcel OD-H column 90:10 hexanes/2-propanol, 1 mL/min, 254 nm;  $t_R = 12.153$  min;  $[\alpha]_D^{25} = +56^\circ$  (c 0.01,  $\text{CH}_2\text{Cl}_2$ ).

**$^1\text{H}$  NMR (400 MHz,  $\text{CDCl}_3$ )**  $\delta$  7.31 (dd,  $J = 5.0, 0.9$  Hz, 1H), 7.10 (d,  $J = 3.0$  Hz, 1H), 7.04 (dd,  $J = 5.0, 3.5$  Hz, 1H), 6.80 – 6.73 (m, 2H), 6.66 – 6.56 (m, 2H), 4.85 (dd,  $J = 7.6, 3.1$  Hz, 1H), 4.20 – 4.04 (m, 2H), 3.48 (dd,  $J = 11.3, 3.1$  Hz, 1H), 3.19 (dd,  $J = 11.3, 7.6$  Hz, 1H), 1.25 (d,  $J = 6.6$  Hz, 3H), 1.17 (d,  $J = 6.6$  Hz, 3H).

**$^{13}\text{C}$  NMR (101 MHz,  $\text{CDCl}_3$ )**  $\delta$  146.18, 134.29, 133.83, 126.50, 125.00, 124.05, 119.39, 117.46, 114.35, 111.50, 50.91, 47.15, 46.70, 19.21, 18.14.

**HRMS (ESI):**  $\text{C}_{15}\text{H}_{18}\text{N}_2\text{S}$  Neutral mass: 258.1191, Observed ( $[\text{M}+\text{H}]^+$ ): 259.1261.

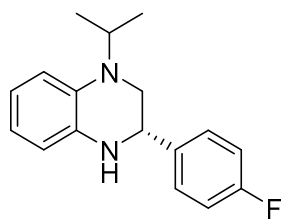

**(S)-3-(4-fluorophenyl)-1-isopropyl-1,2,3,4-tetrahydroquinoxaline (3s):** Yellow oil (12.0 mg, yield 89%), with 96% ee (HPLC, Diacel Chiralcel AD-H column 95:5 hexanes/2-propanol, 1 mL/min, 254 nm;  $t_R = 8.515$  min;  $[\alpha]_D^{25} = +72^\circ$  (c 0.01,  $\text{CH}_2\text{Cl}_2$ ).

**$^1\text{H}$  NMR (400 MHz,  $\text{CDCl}_3$ )**  $\delta$  7.38 (dd,  $J = 8.5, 5.5$  Hz, 2H), 7.08 (t,  $J = 8.6$  Hz, 2H), 6.75 (d,  $J = 2.7$  Hz, 2H), 6.61 (s, 2H), 4.46 (d,  $J = 5.7$  Hz, 1H), 4.11 (dt,  $J = 12.8, 6.4$  Hz, 1H), 3.95 (s, 1H), 3.35 (d,  $J = 11.0$  Hz, 1H), 3.07 – 2.93 (m, 1H), 1.23 (d,  $J = 6.6$  Hz, 3H), 1.09 (d,  $J = 6.6$  Hz, 3H).

**$^{13}\text{C}$  NMR (101 MHz,  $\text{CDCl}_3$ )**  $\delta$  162.40 (d,  $J = 246.44$  Hz), 138.12, 134.58, 134.18, 128.59 (d,  $J = 8.08$  Hz), 119.06, 117.36, 115.41 (d,  $J = 21.21$  Hz), 114.01, 111.43, 54.31, 46.91, 46.68, 19.27, 17.99.

**$^{19}\text{F}\{^1\text{H}\}$  NMR (376 MHz,  $\text{CDCl}_3$ )**  $\delta$  -114.75.

**HRMS (ESI):**  $\text{C}_{17}\text{H}_{19}\text{FN}_2$  Neutral mass: 270.1532, Observed ( $[\text{M}+\text{H}]^+$ ): 271.1601.

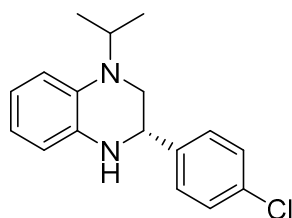

**(S)-3-(4-chlorophenyl)-1-isopropyl-1,2,3,4-tetrahydroquinoxaline (3t):** Yellow oil (13.3 mg, yield 93%), with 98% ee (HPLC, Diacel Chiralcel AD-H column 95:5 hexanes/2-propanol, 1 mL/min, 254 nm;  $t_R = 7.277$  min;  $[\alpha]_D^{25} = +82^\circ$  (c 0.01,  $\text{CH}_2\text{Cl}_2$ ).

**$^1\text{H}$  NMR (400 MHz,  $\text{CDCl}_3$ )**  $\delta$  7.40 – 7.31 (m, 4H), 6.89 – 6.43 (m, 4H), 4.47 (d,  $J = 4.9$  Hz, 1H), 4.19 – 3.82 (m, 2H), 3.35 (dd,  $J = 11.2, 2.5$  Hz, 1H), 3.01 (dd,  $J = 11.1, 8.0$  Hz, 1H), 1.29 (s, 1H), 1.22 (d,  $J = 6.6$  Hz, 3H), 1.08 (d,  $J = 6.6$  Hz, 3H).

**$^{13}\text{C}$  NMR (101 MHz,  $\text{CDCl}_3$ )**  $\delta$  140.98, 134.44, 134.19, 133.48, 128.71, 128.37, 119.08, 117.44, 114.04, 111.50, 54.41, 46.69, 29.73, 19.18, 18.08.

**HRMS (ESI):** C<sub>17</sub>H<sub>19</sub>ClN<sub>2</sub> Neutral mass: 286.1237, Observed ([M+H])<sup>+</sup>: 287.1245.

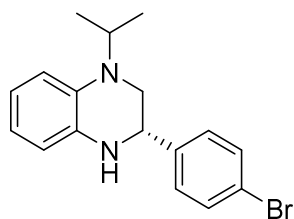

**(S)-3-(4-bromophenyl)-1-isopropyl-1,2,3,4-tetrahydroquinoxaline (3u):** Yellow oil (14.5 mg, yield 88%), with 99% ee (HPLC, Diacel Chiralcel AD-H column 95:5 hexanes/2-propanol, 1 mL/min, 254 nm;  $t_R$  = 9.283 min;  $[\alpha]_D^{25} = +80^\circ$  (c 0.01, CH<sub>2</sub>Cl<sub>2</sub>).

**<sup>1</sup>H NMR (400 MHz, CDCl<sub>3</sub>)**  $\delta$  7.51 (d,  $J$  = 8.4 Hz, 2H), 7.29 (d,  $J$  = 3.2 Hz, 2H), 6.75 (dd,  $J$  = 4.4, 2.0 Hz, 2H), 6.62 (qd,  $J$  = 7.3, 2.0 Hz, 2H), 4.45 (dd,  $J$  = 7.8, 3.0 Hz, 1H), 4.09 (dq,  $J$  = 13.2, 6.6 Hz, 1H), 3.95 (s, 1H), 3.34 (dd,  $J$  = 11.4, 3.1 Hz, 1H), 3.01 (dd,  $J$  = 11.3, 7.8 Hz, 1H), 1.22 (d,  $J$  = 6.6 Hz, 3H), 1.08 (d,  $J$  = 6.6 Hz, 3H).

**<sup>13</sup>C NMR (101 MHz, CDCl<sub>3</sub>)**  $\delta$  141.51, 134.41, 134.19, 131.66, 128.72, 121.59, 119.08, 117.44, 114.03, 111.50, 54.47, 46.66, 19.17, 18.09.

**HRMS (ESI):** C<sub>17</sub>H<sub>19</sub>BrN<sub>2</sub> Neutral mass: 330.0732, Observed ([M+H])<sup>+</sup>: 331.0795.

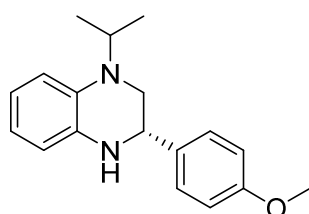

**(S)-1-isopropyl-3-(4-methoxyphenyl)-1,2,3,4-tetrahydroquinoxaline (3v):** Yellow oil (13.1 mg, yield 93%), with 98% ee (HPLC, Diacel Chiralcel AD-H column 95:5 hexanes/2-propanol, 1 mL/min, 254 nm;  $t_R$  = 10.752 min;  $[\alpha]_D^{25} = +76^\circ$  (c 0.01, CH<sub>2</sub>Cl<sub>2</sub>).

**<sup>1</sup>H NMR (400 MHz, CDCl<sub>3</sub>)**  $\delta$  7.33 (d,  $J$  = 8.6 Hz, 2H), 6.93 (d,  $J$  = 8.6 Hz, 2H), 6.74 (d,  $J$  = 2.4 Hz, 2H), 6.67 – 6.54 (m, 2H), 4.40 (dd,  $J$  = 8.4, 3.0 Hz, 1H), 4.12 (dp,  $J$  = 13.4, 6.7 Hz, 1H), 3.93 (s, 1H), 3.85 (s, 3H), 3.36 (dd,  $J$  = 11.3, 3.1 Hz, 1H), 3.02 (dd,  $J$  = 11.2, 8.5 Hz, 1H), 1.23 (d,  $J$  = 6.6 Hz, 3H), 1.11 (d,  $J$  = 6.6 Hz, 3H).

$^{13}\text{C}$  NMR (101 MHz,  $\text{CDCl}_3$ )  $\delta$  155.25, 141.70, 134.40, 133.56, 128.16, 119.29, 117.38, 114.42, 113.98, 111.47, 110.38, 105.91, 55.36, 49.21, 46.72, 43.49, 19.07, 18.26.

**HRMS (ESI):**  $\text{C}_{18}\text{H}_{22}\text{N}_2\text{O}$  Neutral mass: 282.1732, Observed ( $[\text{M}+\text{Na}]^+$ ): 305.1744.

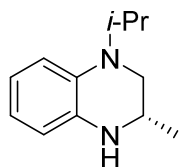

**(S)-1-isopropyl-3-methyl-1,2,3,4-tetrahydroquinoxaline (3w)** Yellow oil (7.6 mg, yield 80%), with 64% ee (HPLC, Diacel Chiralcel OD-H column 95:5 hexanes/2-propanol, 1 mL/min, 254 nm;  $t_{\text{R}}$  = 10.373 min;  $[\alpha]_{\text{D}}^{20} = +34^\circ$  (c 0.01,  $\text{CH}_2\text{Cl}_2$ ).

$^1\text{H}$  NMR (400 MHz,  $\text{CDCl}_3$ )  $\delta$  6.68 (d,  $J = 5.4$  Hz, 2H), 6.60 – 6.49 (m, 2H), 4.16 – 4.04 (m, 1H), 3.50 (s, 1H), 3.29 – 3.20 (m, 1H), 2.84 – 2.72 (m, 1H), 1.22 (d,  $J = 1.9$  Hz, 3H), 1.21 (d,  $J = 1.3$  Hz, 3H), 1.18 (d,  $J = 6.6$  Hz, 3H).

$^{13}\text{C}$  NMR (101 MHz,  $\text{CDCl}_3$ )  $\delta$  134.49, 134.34, 118.86, 117.03, 113.99, 111.06, 46.38, 45.85, 20.32, 19.29, 17.88.

**HRMS (ESI):**  $\text{C}_{12}\text{H}_{18}\text{N}_2$  Neutral mass: 190.1470, Observed ( $[\text{M}+\text{H}]^+$ ): 191.1479.

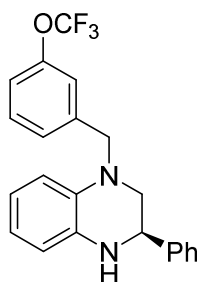

**(R)-3-phenyl-1-(3-(trifluoromethoxy)benzyl)-1,2,3,4-tetrahydroquinoxaline (3y)** Yellow oil (18.4 mg, yield 96%), with 94% ee (HPLC, Diacel Chiralcel AD-H column 95:5 hexanes/2-propanol, 1 mL/min, 254 nm;  $t_{\text{R}}$  = 10.990 min;  $[\alpha]_{\text{D}}^{20} = +54^\circ$  (c 0.01,  $\text{CH}_2\text{Cl}_2$ ).

$^1\text{H}$  NMR (400 MHz,  $\text{CDCl}_3$ )  $\delta$  7.41 (dd,  $J = 7.0, 4.7$  Hz, 4H), 7.36 (dd,  $J = 5.1, 3.5$  Hz, 1H), 7.35 – 7.31 (m, 1H), 7.22 (d,  $J = 7.7$  Hz, 1H), 7.17 – 7.09 (m, 2H), 6.73 – 6.63 (m, 3H), 6.59 (dd,  $J = 7.6, 4.4$  Hz, 1H), 4.58 (t,  $J = 5.6$  Hz, 1H), 4.54 – 4.42 (m, 2H), 4.07 (s, 1H), 3.40 (d,  $J = 5.7$  Hz, 2H).

$^{13}\text{C}$  NMR (101 MHz,  $\text{CDCl}_3$ )  $\delta$  149.62 (d,  $J = 2.02$ ), 141.40 (d,  $J = 15.15$ ), 134.32 (d,  $J = 21.21$ ), 129.93, 128.68, 128.02, 127.00, 125.22, 123.02 (t,  $J = 258.56$ ) 121.74, 119.48, 119.32, 119.13, 118.37, 114.07, 112.04, 56.05, 55.15, 54.33.

**HRMS (ESI):**  $\text{C}_{22}\text{H}_{19}\text{F}_3\text{N}_2\text{O}$  Neutral mass: 384.1449, Observed ( $[\text{M}+\text{H}]^+$ ): 385.1522

$^{19}\text{F}\{^1\text{H}\}$  NMR (376 MHz,  $\text{CDCl}_3$ )  $\delta$  -57.66

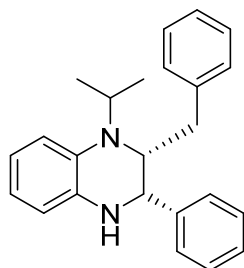

**(2R,3S)-2-benzyl-1-isopropyl-3-phenyl-1,2,3,4-tetrahydroquinoxaline (5a):** White solid (7.9 mg, yield 46%), with 90% ee (HPLC, Diacel Chiralcel OD-H column 95:5 hexanes/2-propanol, 1 mL/min, 254 nm;  $t_{\text{R}} = 6.762$  min; m.p. 122-125  $^{\circ}\text{C}$ ;  $[\alpha]_{\text{D}}^{20} = -36^{\circ}$  (c 0.01,  $\text{CH}_2\text{Cl}_2$ ).

$^1\text{H}$  NMR (400 MHz,  $\text{CDCl}_3$ )  $\delta$  7.38 (dt,  $J = 15.1, 7.5$  Hz, 4H), 7.26 (t,  $J = 7.0$  Hz, 1H), 7.03 (dq,  $J = 14.1, 6.9$  Hz, 3H), 6.84 (d,  $J = 7.9$  Hz, 1H), 6.73 (dd,  $J = 9.5, 5.7$  Hz, 3H), 6.66 (d,  $J = 4.0$  Hz, 2H), 4.22 (d,  $J = 2.5$  Hz, 1H), 3.97 (s, 1H), 3.75 (dq,  $J = 13.5, 6.7$  Hz, 1H), 3.44 (dt,  $J = 10.1, 3.0$  Hz, 1H), 2.38 – 2.15 (m, 2H), 0.97 (d,  $J = 6.6$  Hz, 3H), 0.33 (d,  $J = 6.8$  Hz, 3H).

$^{13}\text{C}$  NMR (101 MHz,  $\text{CDCl}_3$ )  $\delta$  141.50, 140.69, 134.93, 131.55, 130.59, 126.76, 125.56, 119.35, 118.68, 115.17, 58.33, 56.23, 53.57, 32.92, 20.83, 19.39.

**HRMS (ESI):**  $\text{C}_{24}\text{H}_{26}\text{N}_2$  Neutral mass: 342.2096, Observed ( $[\text{M}+\text{H}]^+$ ): 343.2174.

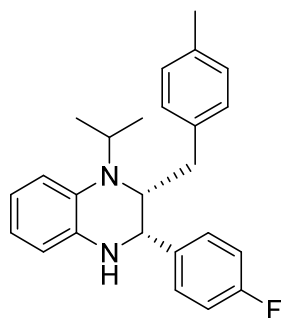

**(2R,3S)-3-(4-fluorophenyl)-1-isopropyl-2-(4-methylbenzyl)-1,2,3,4-tetrahydroquinoxaline (5b):** White solid (7.5 mg, yield 40%), with 90% ee (HPLC, Diacel Chiralcel OD-H column 95:5

hexanes/2-propanol, 1 mL/min, 254 nm;  $t_R = 4.117$  min; m.p. 134-136 °C ;  $[\alpha]_D^{20} = -49^\circ$  (c 0.01, CH<sub>2</sub>Cl<sub>2</sub>).

**<sup>1</sup>H NMR (400 MHz, CDCl<sub>3</sub>)**  $\delta$  7.38 (d,  $J = 7.9$  Hz, 2H), 7.28 (d,  $J = 8.1$  Hz, 2H), 6.94 (d,  $J = 7.8$  Hz, 1H), 6.91 – 6.73 (m, 7H), 4.29 (d,  $J = 2.1$  Hz, 1H), 4.07 (s, 1H), 3.88 (dt,  $J = 13.3, 6.5$  Hz, 1H), 3.46 (dt,  $J = 10.0, 3.0$  Hz, 1H), 2.43 (d,  $J = 7.9$  Hz, 3H), 2.37 (dt,  $J = 24.1, 12.0$  Hz, 2H), 1.08 (d,  $J = 6.5$  Hz, 3H), 0.46 (d,  $J = 6.8$  Hz, 3H).

**<sup>13</sup>C NMR (101 MHz, CDCl<sub>3</sub>)**  $\delta$  161.34(d,  $J = 243.41$  Hz), 138.36, 137.06, 136.34 (d,  $J = 3.03$  Hz), 135.06, 132.85, 131.38(d,  $J = 8.08$  Hz), 129.36, 126.60, 119.29, 118.83 (d,  $J = 8.08$  Hz), 115.14, 114.41, 114.20, 58.21, 55.81, 53.69, 31.96, 29.73, 21.16, 20.94, 19.36.

**HRMS (ESI):** C<sub>25</sub>H<sub>27</sub>FN<sub>2</sub> Neutral mass: 374.2158, Observed ( $[M+Na]^+$ ): 397.2011.

**<sup>19</sup>F{<sup>1</sup>H} NMR (376 MHz, CDCl<sub>3</sub>)**  $\delta$  -118.32.

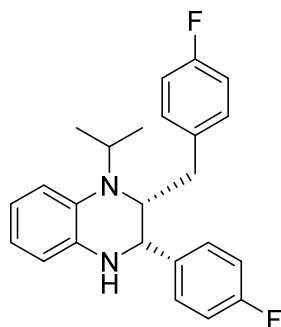

**(2R,3S)-2-(4-fluorobenzyl)-3-(4-fluorophenyl)-1-isopropyl-1,2,3,4-tetrahydroquinoline**

**(5c):** White solid (5.7 mg, yield 30%), with 90% ee (HPLC, Diacel Chiralcel IC-H column 99:1 hexanes/2-propanol, 1 mL/min, 254 nm;  $t_R = 6.275$  min; m.p. 122-125°C;  $[\alpha]_D^{20} = -56^\circ$  (c 0.01, CH<sub>2</sub>Cl<sub>2</sub>).

**<sup>1</sup>H NMR (400 MHz, CDCl<sub>3</sub>)**  $\delta$  7.47 (dd,  $J = 8.2, 5.5$  Hz, 2H), 7.17 (t,  $J = 8.6$  Hz, 2H), 6.94 (d,  $J = 7.9$  Hz, 1H), 6.86 (dd,  $J = 11.9, 5.3$  Hz, 3H), 6.78 (dt,  $J = 7.1, 5.4$  Hz, 4H), 4.30 (s, 1H), 4.04 (s, 1H), 3.87 (dt,  $J = 13.4, 6.7$  Hz, 1H), 3.43 (dd,  $J = 9.4, 4.2$  Hz, 1H), 2.35 (d,  $J = 6.9$  Hz, 2H), 1.07 (d,  $J = 6.6$  Hz, 3H), 0.46 (d,  $J = 6.8$  Hz, 3H).

**<sup>13</sup>C NMR (101 MHz, CDCl<sub>3</sub>)**  $\delta$  162.13 (d,  $J = 247.45$  Hz), 161.38 (d,  $J = 244.42$  Hz); 137.13 (d,  $J = 3.03$  Hz), 136.02 (d,  $J = 3.03$  Hz), 134.82, 132.81, 131.34 (d,  $J = 7.07$  Hz), 128.26 (d,  $J = 8.08$  Hz),



119.59, 118.96, 118.92, 115.59 (d,  $J = 21.21$  Hz), 115.30, 114.40 (d,  $J = 21.21$  Hz), 58.13, 55.47, 53.70, 31.82, 29.73, 20.91, 19.37.

$^{19}\text{F}\{^1\text{H}\}$  NMR (376 MHz,  $\text{CDCl}_3$ )  $\delta$  -115.11, -118.08.

**HRMS (ESI):**  $\text{C}_{24}\text{H}_{24}\text{F}_2\text{N}_2$  Neutral mass: 378.1908, Observed ( $[\text{M}+\text{H}]^+$ ): 379.1992.

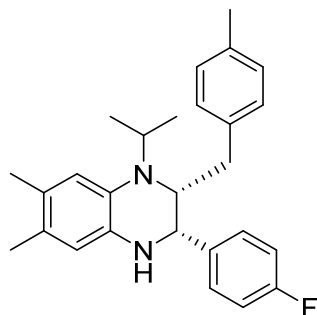

**(2R,3S)-3-(4-fluorophenyl)-1-isopropyl-6,7-dimethyl-2-(4-methylbenzyl)-1,2,3,4-**

**tetrahydroquinoxaline (5d):** White solid (8.1 mg, yield 40%), with 94% ee (HPLC, Diacel Chiralcel IC-H column 99:1 hexanes/2-propanol, 1 mL/min, 254 nm;  $t_R = 4.603$  min; m.p. 142-145°C;  $[\alpha]_D^{20} = -48^\circ$  (c 0.01,  $\text{CH}_2\text{Cl}_2$ ).

$^1\text{H}$  NMR (400 MHz,  $\text{CDCl}_3$ )  $\delta$  7.38 (d,  $J = 8.0$  Hz, 2H), 7.27 (d,  $J = 8.0$  Hz, 2H), 6.91 – 6.78 (m, 4H), 6.75 (s, 1H), 6.58 (s, 1H), 4.25 (s, 1H), 3.94 – 3.77 (m, 1H), 3.40 (d,  $J = 9.5$  Hz, 1H), 2.44 (s, 3H), 2.39 – 2.30 (m, 2H), 2.25 (d,  $J = 6.9$  Hz, 6H), 1.07 (d,  $J = 6.6$  Hz, 3H), 0.47 (d,  $J = 6.8$  Hz, 3H).

$^{13}\text{C}$  NMR (101 MHz,  $\text{CDCl}_3$ )  $\delta$  161.31 (d,  $J = 243.41$  Hz), 138.69, 136.90, 136.58 (d,  $J = 3.03$ ), 132.94, 131.39 (d,  $J = 8.08$  Hz), 130.64, 129.30, 127.08, 126.81, 126.58, 120.35, 116.70, 114.22 (d,  $J = 21.21$ ), 58.54, 55.91, 53.71, 31.84, 21.13, 21.02, 19.42, 19.16, 19.03.

$^{19}\text{F}\{^1\text{H}\}$  NMR (376 MHz,  $\text{CDCl}_3$ )  $\delta$  -118.49.

**HRMS (ESI):**  $\text{C}_{27}\text{H}_{31}\text{FN}_2$  Neutral mass: 402.2471, Observed ( $[\text{M}+\text{H}]^+$ ): 403.2482.

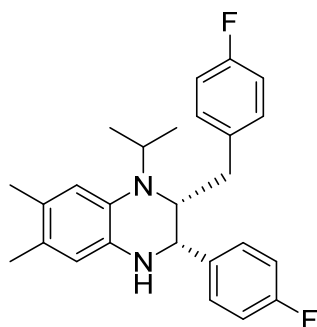

**(2R,3S)-2-(4-fluorobenzyl)-3-(4-fluorophenyl)-1-isopropyl-6,7-dimethyl-1,2,3,4-**

**tetrahydroquinoxaline (5e):** White solid (6.1 mg, yield 30%), with 92% ee (HPLC, Diacel Chiralcel OD-H column 99:1 hexanes/2-propanol, 1 mL/min, 254 nm;  $t_R = 5.885$  min; m.p. 140-143°C;  $[\alpha]_D^{20} = -36^\circ$  (c 0.01, CH<sub>2</sub>Cl<sub>2</sub>).

**<sup>1</sup>H NMR (400 MHz, CDCl<sub>3</sub>)**  $\delta$  7.46 (dd,  $J = 8.3, 5.5$  Hz, 2H), 7.16 (t,  $J = 8.6$  Hz, 2H), 6.93 – 6.78 (m, 4H), 6.75 (s, 1H), 6.58 (s, 1H), 4.27 (s, 1H), 3.80 (d,  $J = 48.6$  Hz, 2H), 3.37 (s, 1H), 2.41 – 2.31 (m, 2H), 2.25 (d,  $J = 4.2$  Hz, 6H), 1.07 (d,  $J = 6.5$  Hz, 3H), 0.47 (d,  $J = 6.7$  Hz, 3H).

**<sup>13</sup>C NMR (101 MHz, CDCl<sub>3</sub>)**  $\delta$  162.07 (d,  $J = 246.44$  Hz), 161.34 (d,  $J = 243.41$  Hz), 136.26, 136.24, 132.72 (d,  $J = 2.02$  Hz), 131.34 (d,  $J = 8.08$  Hz), 132.71, 130.58, 128.22 (d,  $J = 7.07$  Hz), 126.98, 120.48, 116.81, 115.51 (d,  $J = 22.22$  Hz), 114.31 (d,  $J = 21.21$  Hz), 58.43, 55.55, 53.71, 31.70, 20.97, 19.45, 19.12.

**<sup>19</sup>F{<sup>1</sup>H} NMR (376 MHz, CDCl<sub>3</sub>)**  $\delta$  -115.32, -118.26.

**HRMS (ESI):** C<sub>26</sub>H<sub>28</sub>F<sub>2</sub>N<sub>2</sub> Neutral mass: 406.2221, Observed ( $[M+H]^+$ ): 407.2230.

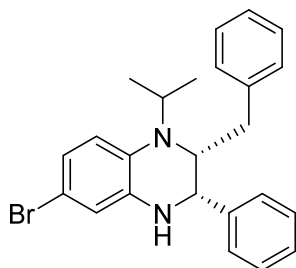

**(2R,3S)-2-benzyl-6-bromo-1-isopropyl-3-phenyl-1,2,3,4-tetrahydroquinoxaline (5f):** White solid (6.3 mg, yield 30%), with 96% ee (HPLC, Diacel Chiralcel OD-H column 95:5 hexanes/2-propanol, 1 mL/min, 254 nm;  $t_R = 7.765$  min; m.p. 133-135°C;  $[\alpha]_D^{20} = -68^\circ$  (c 0.01, CH<sub>2</sub>Cl<sub>2</sub>).

**<sup>1</sup>H NMR (400 MHz, CDCl<sub>3</sub>)**  $\delta$  7.47 (d,  $J = 4.4$  Hz, 4H), 7.41 – 7.34 (m, 1H), 7.20 – 7.09 (m, 3H), 6.94 – 6.86 (m, 2H), 6.83 (d,  $J = 6.6$  Hz, 2H), 6.78 (d,  $J = 8.5$  Hz, 1H), 4.30 (d,  $J = 2.7$  Hz, 1H), 4.14 (s, 1H), 3.78 (dt,  $J = 13.4, 6.7$  Hz, 1H), 3.53 (dd,  $J = 13.4, 2.8$  Hz, 1H), 2.44 – 2.25 (m, 2H), 1.06 (d,  $J = 6.6$  Hz, 3H), 0.42 (d,  $J = 6.8$  Hz, 3H).

**<sup>13</sup>C NMR (101 MHz, CDCl<sub>3</sub>)**  $\delta$  140.86, 140.28, 136.35, 131.98, 129.99, 128.76, 127.65, 126.68 (s), 125.69, 121.83, 119.98, 117.31, 110.46, 58.07, 56.15, 53.83, 32.82, 20.62, 19.41.

**HRMS (ESI):** C<sub>24</sub>H<sub>25</sub>BrN<sub>2</sub> Neutral mass: 420.1201, Observed ([M+H]<sup>+</sup>): 421.1274

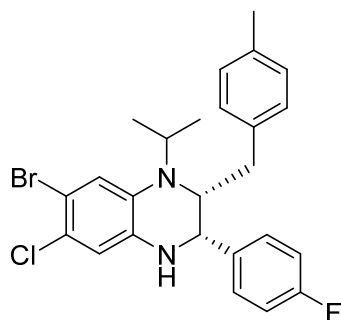

**(2R,3S)-7-bromo-6-chloro-3-(4-fluorophenyl)-1-isopropyl-2-(4-methylbenzyl)-1,2,3,4-tetrahydroquinoxaline (5g):** White solid (6.3 mg, yield 26%), with 90% ee (HPLC, Diacel Chiralcel IC-H column 99:1 hexanes/2-propanol, 1 mL/min, 254 nm; *t<sub>R</sub>* = 5.563 min; m.p. 162-165°C; [ $\alpha$ ]<sub>D</sub><sup>20</sup> = -46° (c 0.01, CH<sub>2</sub>Cl<sub>2</sub>).

**<sup>1</sup>H NMR (400 MHz, CDCl<sub>3</sub>)**  $\delta$  7.36 – 7.24 (m, 4H), 7.07 (s, 1H), 6.88 (t, *J* = 8.7 Hz, 2H), 6.84 – 6.74 (m, 3H), 4.23 (d, *J* = 2.4 Hz, 1H), 4.14 (s, 1H), 3.83 – 3.70 (m, 1H), 3.45 (d, *J* = 8.3 Hz, 1H), 2.43 (s, 3H), 2.41 – 2.34 (m, 1H), 2.32 – 2.22 (m, 1H), 1.07 (d, *J* = 6.5 Hz, 3H), 0.44 (d, *J* = 6.8 Hz, 3H).

**<sup>13</sup>C NMR (101 MHz, CDCl<sub>3</sub>)**  $\delta$  161.45 (d, *J* = 242.42 Hz), 137.49, 137.31, 135.66 (d, *J* = 3.03 Hz), 135.41, 132.91, 131.25 (d, *J* = 7.07 Hz), 129.52, 126.47, 122.92, 122.29, 115.45, 114.57 (d, *J* = 21.21 Hz), 110.11, 57.82, 55.92, 54.09, 32.04, 21.14, 20.60, 19.42.

**<sup>19</sup>F{<sup>1</sup>H} NMR (376 MHz, CDCl<sub>3</sub>)**  $\delta$  -117.72.

**HRMS (ESI):** C<sub>25</sub>H<sub>25</sub>BrClFN<sub>2</sub> Neutral mass:486.0874, Observed ([M+H]<sup>+</sup>): 487.0892.

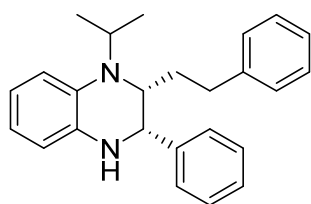

**(2R,3S)-1-isopropyl-2-phenethyl-3-phenyl-1,2,3,4-tetrahydroquinoxaline (5h):** White solid (6.2 mg, yield 35%), with 82% ee (HPLC, Diacel Chiralcel OD-H column 95:5 hexanes/2-propanol, 1 mL/min, 254 nm; *t<sub>R</sub>* = 6.288 min; m.p. 136-138°C; [ $\alpha$ ]<sub>D</sub><sup>20</sup> = -18° (c 0.01, CH<sub>2</sub>Cl<sub>2</sub>).

**<sup>1</sup>H NMR (400 MHz, CDCl<sub>3</sub>)**  $\delta$  7.46 (q, *J* = 7.7 Hz, 4H), 7.36 (t, *J* = 6.6 Hz, 1H), 7.18 (t, *J* = 7.2 Hz, 2H), 7.12 (t, *J* = 7.2 Hz, 1H), 7.00 (d, *J* = 7.9 Hz, 1H), 6.93 (d, *J* = 7.2 Hz, 2H), 6.82 (dd, *J* = 11.4, 4.8

Hz, 1H), 6.74 (q,  $J = 7.7$  Hz, 2H), 4.33 (d,  $J = 2.4$  Hz, 1H), 4.13 (dt,  $J = 13.3, 6.6$  Hz, 1H), 4.03 (s, 1H), 3.53 – 3.43 (m, 1H), 2.69 (ddd,  $J = 14.4, 11.1, 5.2$  Hz, 1H), 2.22 (ddd,  $J = 13.8, 11.4, 5.9$  Hz, 1H), 1.72 – 1.59 (m, 1H), 1.56 – 1.44 (m, 1H), 1.35 (d,  $J = 6.8$  Hz, 3H), 1.27 (d,  $J = 6.6$  Hz, 3H).

$^{13}\text{C}$  NMR (101 MHz,  $\text{CDCl}_3$ )  $\delta$  142.61, 141.37, 135.05, 132.97, 128.60, 128.31, 128.09, 127.36, 126.85, 125.42, 119.05, 118.65, 118.23, 115.06, 55.99, 55.37, 53.48, 33.12, 29.07, 22.24, 19.68

**HRMS (ESI):**  $\text{C}_{25}\text{H}_{28}\text{N}_2$  Neutral mass: 356.2252, Observed ( $[\text{M}+\text{H}]^+$ ): 357.2268.

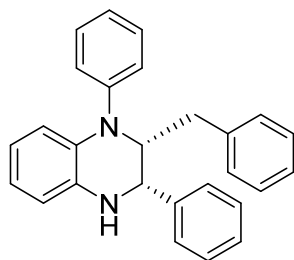

**(2R,3S)-2-benzyl-1,3-diphenyl-1,2,3,4-tetrahydroquinoxaline (5i):** White solid (6.0 mg, yield 32%), with 96% ee (HPLC, Diacel Chiralcel IC-H column 99:1 hexanes/2-propanol, 1 mL/min, 254 nm;  $t_{\text{R}} = 4.718$  min; m.p. 139-141°C;  $[\alpha]_{\text{D}}^{20} = -92^\circ$  (c 0.01,  $\text{CH}_2\text{Cl}_2$ ).

$^1\text{H}$  NMR (400 MHz,  $\text{CDCl}_3$ )  $\delta$  7.45 (dd,  $J = 7.3, 6.0$  Hz, 4H), 7.41 – 7.34 (m, 1H), 7.28 – 7.18 (m, 3H), 7.09 (t,  $J = 7.4$  Hz, 3H), 7.02 (d,  $J = 7.0$  Hz, 2H), 6.97 (t,  $J = 7.5$  Hz, 1H), 6.87 (dd,  $J = 13.5, 7.0$  Hz, 2H), 6.79 (t,  $J = 7.5$  Hz, 1H), 6.54 (d,  $J = 8.1$  Hz, 2H), 4.58 (d,  $J = 2.7$  Hz, 1H), 4.28 (s, 1H), 3.98 – 3.87 (m, 1H), 2.70 – 2.59 (m, 1H), 2.54 (dd,  $J = 13.5, 2.4$  Hz, 1H).

$^{13}\text{C}$  NMR (101 MHz,  $\text{CDCl}_3$ )  $\delta$  150.42, 140.41, 140.08, 136.71, 129.81, 128.93, 128.71, 128.26, 127.91, 127.66, 126.92, 126.06, 123.37, 122.17, 121.63, 121.36, 118.79, 115.71, 67.32, 54.95, 31.99.

**HRMS (ESI):**  $\text{C}_{27}\text{H}_{24}\text{N}_2$  Neutral mass: 376.1939, Observed ( $[\text{M}+\text{H}]^+$ ): 377.2017.

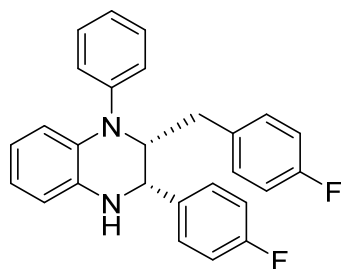

**(2R,3S)-2-(4-fluorobenzyl)-3-(4-fluorophenyl)-1-phenyl-1,2,3,4-tetrahydroquinoxaline (5j):**

White solid (7.2 mg, yield 35%), with 92% ee (HPLC, Diacel Chiralcel IC-H column 99:1 hexanes/2-propanol, 1 mL/min, 254 nm;  $t_R$  = 6.275 min; m.p. 140-142°C;  $[\alpha]_D^{20}$  = -58° (c 0.01, CH<sub>2</sub>Cl<sub>2</sub>).

<sup>1</sup>H NMR (400 MHz, CDCl<sub>3</sub>) δ 7.42 (dd,  $J$  = 8.4, 5.4 Hz, 2H), 7.11 (ddd,  $J$  = 20.9, 12.9, 8.7 Hz, 5H), 6.95 (dd,  $J$  = 10.0, 7.2 Hz, 5H), 6.88 (t,  $J$  = 7.3 Hz, 2H), 6.79 (t,  $J$  = 7.5 Hz, 1H), 6.54 (d,  $J$  = 7.8 Hz, 2H), 4.55 (d,  $J$  = 2.6 Hz, 1H), 4.22 (s, 1H), 3.89 – 3.72 (m, 1H), 2.67 – 2.55 (m, 1H), 2.51 – 2.40 (m, 1H).

<sup>13</sup>C NMR (101 MHz, CDCl<sub>3</sub>) δ 162.22 (d,  $J$  = 250.48 Hz), 161.57 (d,  $J$  = 244.42 Hz), 150.35, 136.05 (d,  $J$  = 3.03 Hz), 136.45 (d,  $J$  = 3.03 Hz), 131.13 (d,  $J$  = 7.07 Hz), 129.03, 128.47 (d,  $J$  = 7.07 Hz), 127.79, 123.39, 122.34, 121.57, 119.08, 115.86, 115.63 (d,  $J$  = 21.21 Hz), 115.04 (d,  $J$  = 21.21 Hz), 114.94, 67.29, 54.19, 30.98.

<sup>19</sup>F{<sup>1</sup>H} NMR (376 MHz, CDCl<sub>3</sub>) δ -114.63, -117.26.

**HRMS (ESI):** C<sub>27</sub>H<sub>22</sub>F<sub>2</sub>N<sub>2</sub> Neutral mass: 412.1751, Observed ( $[M+H]^+$ ): 413.18258.

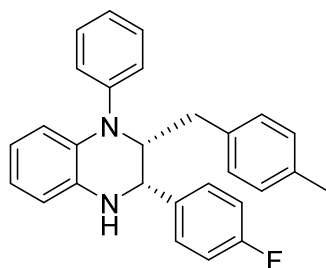

**(2R,3S)-3-(4-fluorophenyl)-2-(4-methylbenzyl)-1-phenyl-1,2,3,4-tetrahydroquinoxaline (5k):**

White solid (7.1mg, yield 35%), with 96% ee (HPLC, Diacel Chiralcel IC-H column 99:1 hexanes/2-propanol, 1 mL/min, 254 nm;  $t_R$  = 11.297 min; m.p. 143-146°C;  $[\alpha]_D^{20}$  = -49° (c 0.01, CH<sub>2</sub>Cl<sub>2</sub>).

<sup>1</sup>H NMR (400 MHz, CDCl<sub>3</sub>) δ 7.37 – 7.21 (m, 5H), 7.10 (dd,  $J$  = 15.9, 8.0 Hz, 3H), 6.96 (dd,  $J$  = 14.6, 6.6 Hz, 5H), 6.88 (t,  $J$  = 7.7 Hz, 2H), 6.79 (t,  $J$  = 7.3 Hz, 1H), 6.56 (d,  $J$  = 7.8 Hz, 2H), 4.54 (s, 1H), 4.24 (s, 1H), 3.86 (d,  $J$  = 11.1 Hz, 1H), 2.68 – 2.49 (m, 2H), 2.43 (s, 3H).

$^{13}\text{C}$  NMR (101 MHz,  $\text{CDCl}_3$ )  $\delta$  161.55 (d,  $J = 244.42$  Hz), 150.46, 137.37, 137.27, 136.83, 135.76 (d,  $J = 3.03$  Hz), 131.19 (d,  $J = 7.07$  Hz), 129.41, 129.01, 127.71, 126.77, 123.39, 122.29, 121.54, 121.44, 118.75, 115.71, 114.99 (d,  $J = 21.21$  Hz), 67.28, 54.60, 31.11, 21.15.

$^{19}\text{F}\{^1\text{H}\}$  NMR (376 MHz,  $\text{CDCl}_3$ )  $\delta$  -117.43.

HRMS (ESI):  $\text{C}_{28}\text{H}_{25}\text{FN}_2$  Neutral mass: 408.2001, Observed ( $[\text{M}+\text{H}]^+$ ): 409.2076

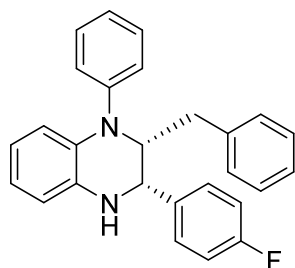

**(2R,3S)-2-benzyl-3-(4-fluorophenyl)-1-phenyl-1,2,3,4-tetrahydroquinoxaline (5I):** White solid (7.5 mg, yield 38%), with 88% ee (HPLC, Diacel Chiralcel IC-H column 99:1 hexanes/2-propanol, 1 mL/min, 254 nm;  $t_{\text{R}} = 12.630$  min; m.p. 144-146°C;  $[\alpha]_{\text{D}}^{20} = -38^\circ$  (c 0.01,  $\text{CH}_2\text{Cl}_2$ ).

$^1\text{H}$  NMR (400 MHz,  $\text{CDCl}_3$ )  $\delta$  7.45 (d,  $J = 4.3$  Hz, 4H), 7.38 (td,  $J = 8.3, 4.0$  Hz, 1H), 7.10 (dd,  $J = 16.4, 8.4$  Hz, 3H), 7.02 – 6.92 (m, 5H), 6.88 (t,  $J = 6.9$  Hz, 2H), 6.79 (t,  $J = 7.4$  Hz, 1H), 6.56 (d,  $J = 7.9$  Hz, 2H), 4.57 (s, 1H), 4.27 (s, 1H), 3.89 (d,  $J = 11.3$  Hz, 1H), 2.69 – 2.56 (m, 1H), 2.51 (dd,  $J = 13.6, 2.4$  Hz, 1H).

$^{13}\text{C}$  NMR (101 MHz,  $\text{CDCl}_3$ )  $\delta$  161.54 (d,  $J = 244.42$  Hz), 150.42, 140.28, 136.73, 135.64, 131.15 (d,  $J = 8.08$  Hz), 129.01, 128.72, 127.71 (d,  $J = 2.02$  Hz), 126.88, 123.40, 122.32, 121.555, 121.49, 118.84, 115.76, 115.00 (d,  $J = 21.21$  Hz), 67.26, 54.80, 31.13.

$^{19}\text{F}\{^1\text{H}\}$  NMR (376 MHz,  $\text{CDCl}_3$ )  $\delta$  -117.39

HRMS (ESI):  $\text{C}_{27}\text{H}_{23}\text{FN}_2$  Neutral mass: 394.1845, Observed ( $[\text{M}+\text{H}]^+$ ): 395.1919.

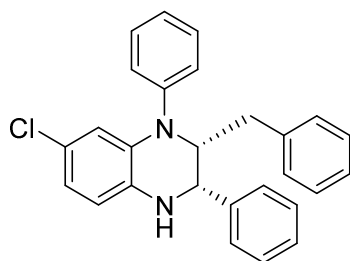

**(2R,3S)-2-benzyl-7-chloro-1,3-diphenyl-1,2,3,4-tetrahydroquinoxaline (5m):** White solid (5.1 mg, yield 30%), with 86% ee (HPLC, Diacel Chiralcel IC-H column 99:1 hexanes/2-propanol, 1 mL/min, 254 nm;  $t_R = 21.177$  min; m.p. 146-148°C;  $[\alpha]_D^{20} = -28^\circ$  (c 0.01, CH<sub>2</sub>Cl<sub>2</sub>).

**<sup>1</sup>H NMR (400 MHz, CDCl<sub>3</sub>)**  $\delta$  7.44 (d,  $J = 3.7$  Hz, 4H), 7.40 – 7.34 (m, 1H), 7.28 – 7.19 (m, 3H), 7.10 (t,  $J = 7.9$  Hz, 2H), 7.01 (dd,  $J = 12.4, 4.5$  Hz, 3H), 6.89 (dd,  $J = 13.5, 4.9$  Hz, 2H), 6.78 (d,  $J = 8.5$  Hz, 1H), 6.49 (d,  $J = 7.9$  Hz, 2H), 4.54 (d,  $J = 2.9$  Hz, 1H), 4.28 (s, 1H), 3.87 (dt,  $J = 10.6, 3.0$  Hz, 1H), 2.65 – 2.49 (m, 2H).

**<sup>13</sup>C NMR (101 MHz, CDCl<sub>3</sub>)**  $\delta$  149.77, 139.96, 139.72, 135.08, 129.75, 129.22, 128.75, 128.36, 127.78, 126.85, 126.19, 123.27, 122.15, 121.75, 116.48, 67.32, 54.92, 32.15, 29.72.

**HRMS (ESI):** C<sub>27</sub>H<sub>23</sub>ClN<sub>2</sub> Neutral mass: 410.1549, Observed ( $[M+H]^+$ ): 411.1637.

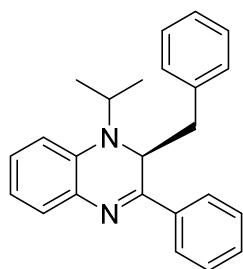

**(S)-2-benzyl-1-isopropyl-3-phenyl-1,2-dihydroquinoxaline (5a')**: Yellow solid (5.1 mg, yield 30%), with 94% ee (HPLC, Diacel Chiralcel IC-H column 99:1 hexanes/2-propanol, 1 mL/min, 254 nm;  $t_R = 8.968$  min; m.p. 134-136°C;  $[\alpha]_D^{20} = +28^\circ$  (c 0.01, CH<sub>2</sub>Cl<sub>2</sub>).

**<sup>1</sup>H NMR (400 MHz, CDCl<sub>3</sub>)**  $\delta$  8.01 (dd,  $J = 7.3, 1.9$  Hz, 2H), 7.56 (d,  $J = 7.7$  Hz, 1H), 7.51 – 7.42 (m, 3H), 7.27 (d,  $J = 7.4$  Hz, 2H), 7.23 (d,  $J = 4.6$  Hz, 1H), 7.20 (d,  $J = 7.3$  Hz, 1H), 7.12 (d,  $J = 7.0$  Hz, 2H), 7.08 (d,  $J = 8.0$  Hz, 1H), 6.99 (t,  $J = 7.5$  Hz, 1H), 4.76 (dd,  $J = 9.6, 4.7$  Hz, 1H), 3.82 (dt,  $J = 13.3, 6.7$  Hz, 1H), 2.68 (dd,  $J = 13.4, 4.6$  Hz, 1H), 2.52 (dd,  $J = 13.3, 9.6$  Hz, 1H), 0.88 (d,  $J = 6.5$  Hz, 3H), 0.80 (d,  $J = 6.8$  Hz, 3H).

**<sup>13</sup>C NMR (101 MHz, CDCl<sub>3</sub>)**  $\delta$  156.69, 137.83, 137.02, 136.43, 130.08, 129.97, 128.68, 128.06, 127.58, 127.00, 126.37, 119.49, 118.44, 53.86, 50.91 – 50.58, 36.37, 29.72, 21.60, 21.17.

**HRMS (ESI):** C<sub>24</sub>H<sub>24</sub>N<sub>2</sub> Neutral mass: 340.1939, Observed ( $[M+H]^+$ ): 341.2013.

## HPLC spectrum

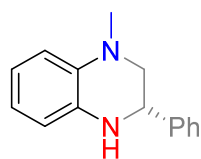

**3a**

**(S)-1-methyl-3-phenyl-1,2,3,4-tetrahydroquinoxaline**

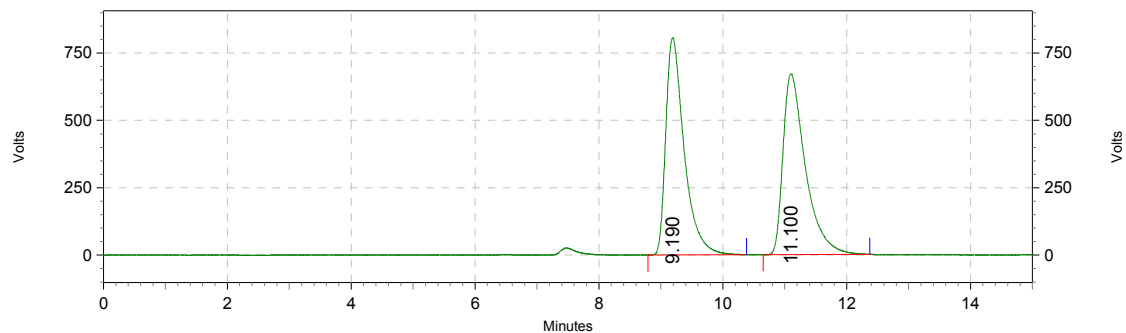

| Peak# | t <sub>R</sub> (min) | Area     | Area (%) |
|-------|----------------------|----------|----------|
| 1     | 9.190                | 16577727 | 49.617   |
| 2     | 11.100               | 16833633 | 50.383   |

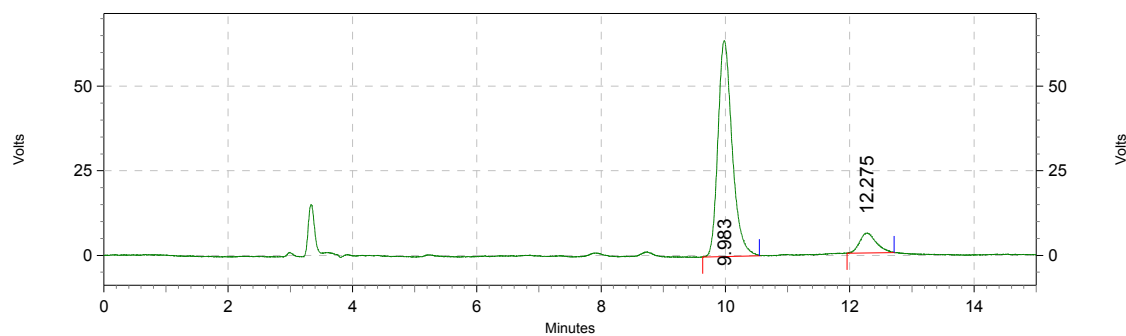

| Peak# | t <sub>R</sub> (min) | Area    | Area (%) |
|-------|----------------------|---------|----------|
| 1     | 9.983                | 1011626 | 90.185   |
| 2     | 12.275               | 110101  | 9.815    |



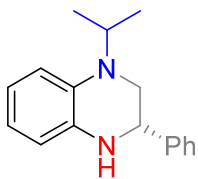

**3b**

**(S)-1-isopropyl-3-phenyl-1,2,3,4-tetrahydroquinoxaline**

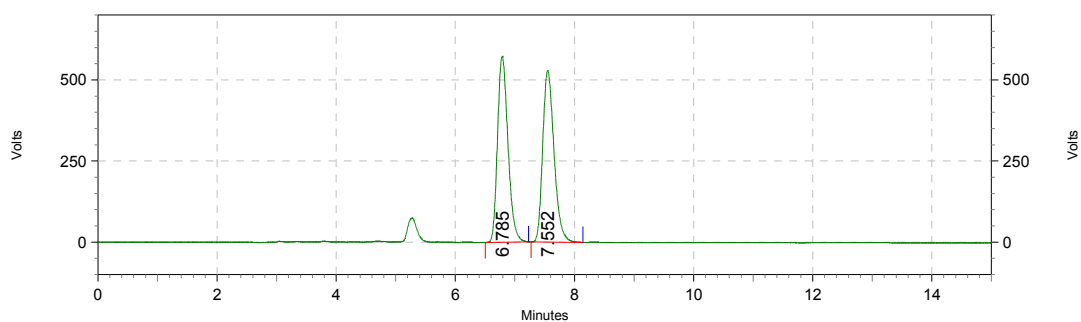

| Peak# | t <sub>R</sub> (min) | Area    | Area (%) |
|-------|----------------------|---------|----------|
| 1     | 6.785                | 6995398 | 50.045   |
| 2     | 7.552                | 6982695 | 49.955   |

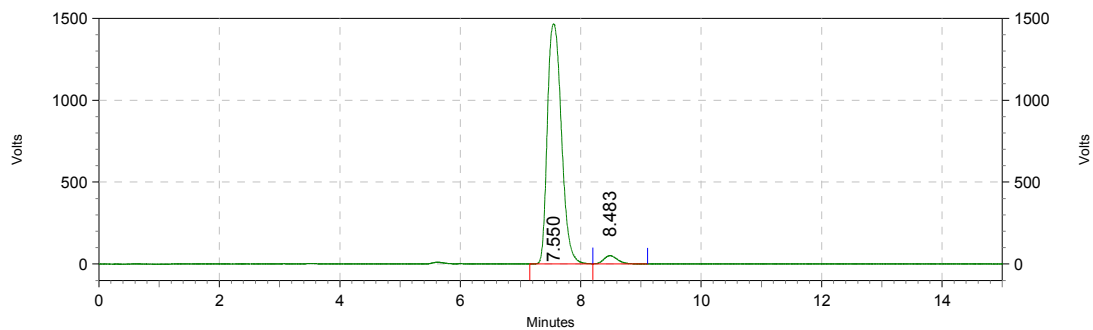

| Peak# | t <sub>R</sub> (min) | Area     | Area (%) |
|-------|----------------------|----------|----------|
| 1     | 7.550                | 23729277 | 96.859   |
| 2     | 8.483                | 769610   | 3.141    |

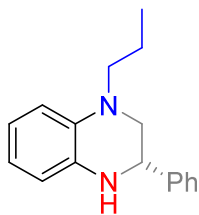

**3c**

**(S)-3-phenyl-1-propyl-1,2,3,4-tetrahydroquinoline**

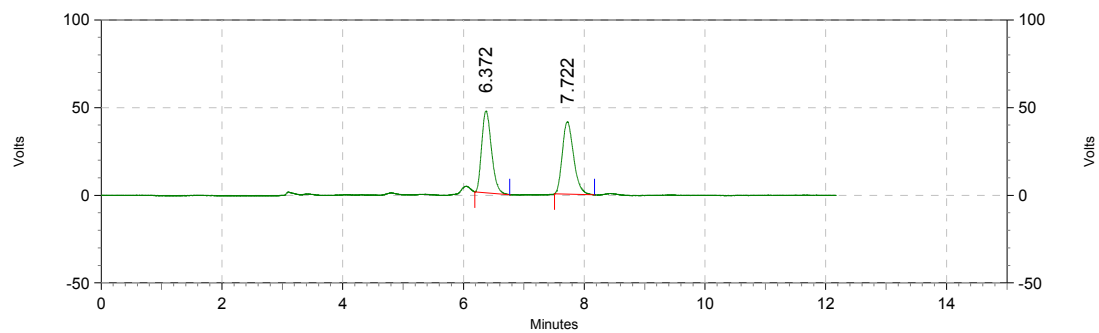

| Peak# | t <sub>R</sub> (min) | Area   | Area (%) |
|-------|----------------------|--------|----------|
| 1     | 6.372                | 527826 | 49.677   |
| 2     | 7.722                | 534685 | 50.323   |

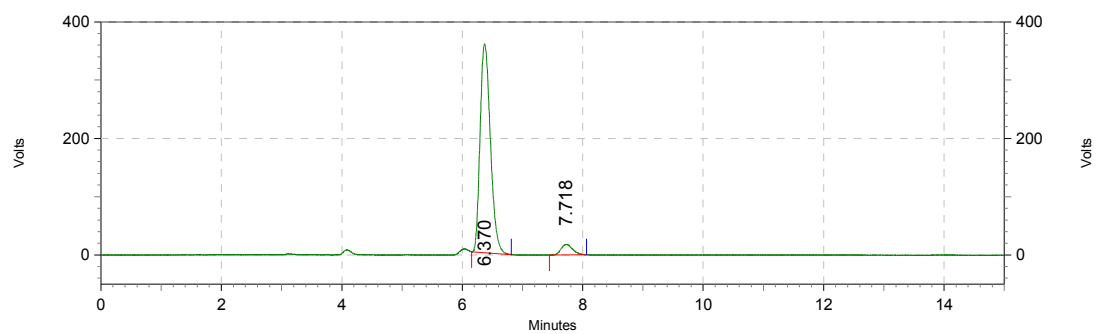

| Peak# | t <sub>R</sub> (min) | Area    | Area (%) |
|-------|----------------------|---------|----------|
| 1     | 6.370                | 4270769 | 94.649   |
| 2     | 7.718                | 241472  | 5.351    |

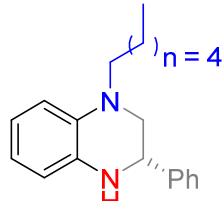

**3d**

**(S)**-3-phenyl-1-propyl-1,2,3,4-tetrahydroquinoxaline

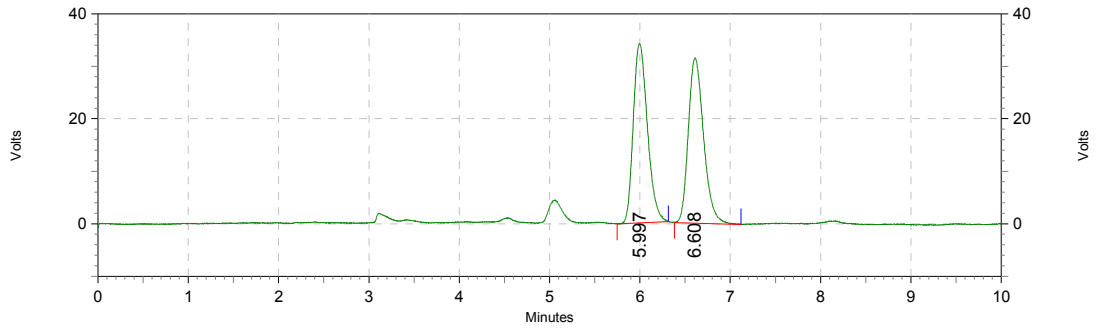

| Peak# | t <sub>R</sub> (min) | Area   | Area (%) |
|-------|----------------------|--------|----------|
| 1     | 5.997                | 372055 | 50.159   |
| 2     | 6.608                | 369694 | 49.841   |

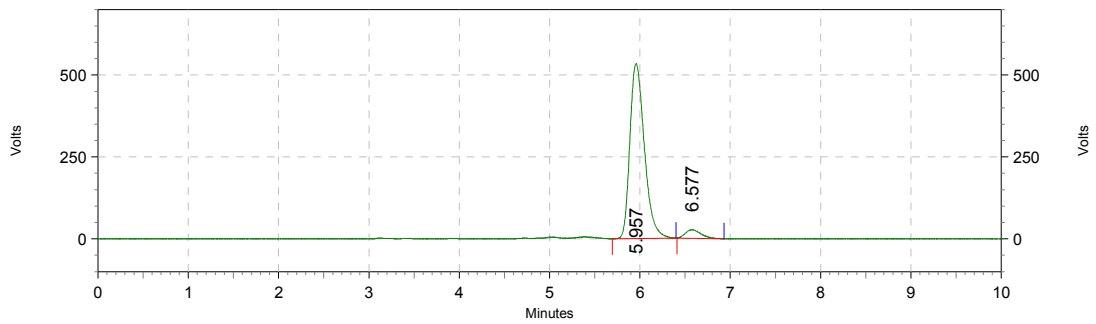

| Peak# | t <sub>R</sub> (min) | Area    | Area (%) |
|-------|----------------------|---------|----------|
| 1     | 5.957                | 5936868 | 95.130   |
| 2     | 6.577                | 303899  | 4.870    |

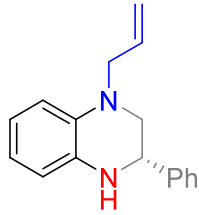

**3e**

**(S)-1-allyl-3-phenyl-1,2,3,4-tetrahydroquinoline**

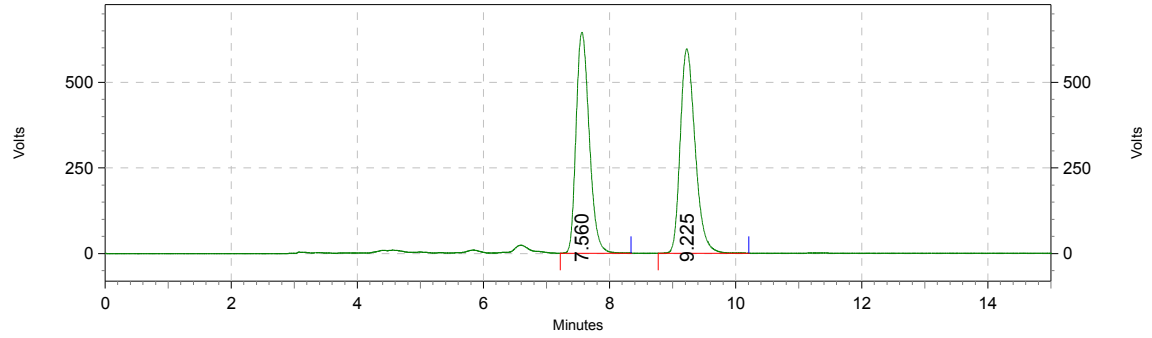

| Peak# | t <sub>R</sub> (min) | Area    | Area (%) |
|-------|----------------------|---------|----------|
| 1     | 7.560                | 9350461 | 48.854   |
| 2     | 9.225                | 9789248 | 51.146   |

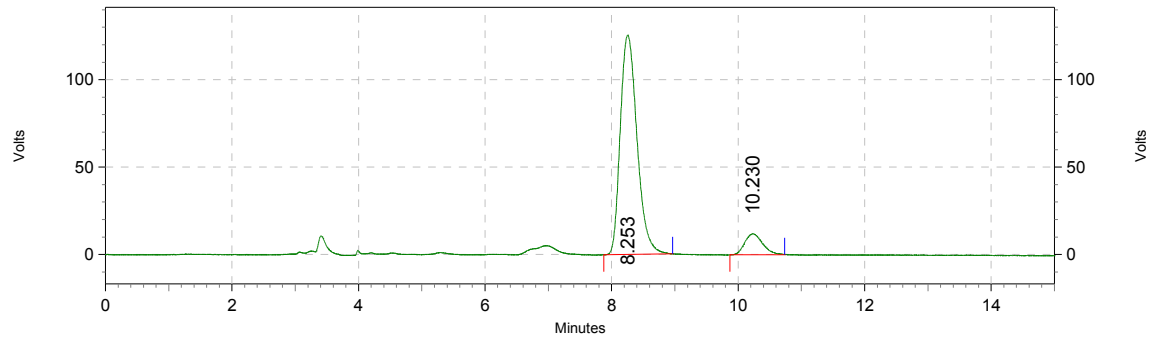

| Peak# | t <sub>R</sub> (min) | Area    | Area (%) |
|-------|----------------------|---------|----------|
| 1     | 8.253                | 2307581 | 90.770   |
| 2     | 10.230               | 234660  | 9.230    |

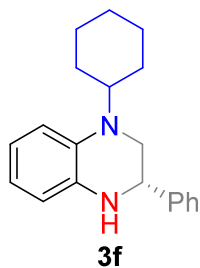

**(S)**-1-cyclohexyl-3-phenyl-1,2,3,4-tetrahydroquinoline

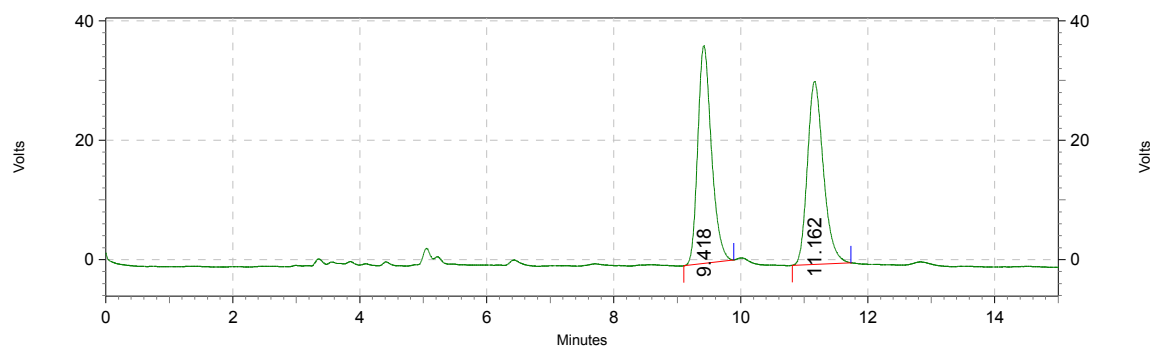

| Peak# | t <sub>R</sub> (min) | Area   | Area (%) |
|-------|----------------------|--------|----------|
| 1     | 9.418                | 546231 | 50.538   |
| 2     | 11.162               | 534608 | 49.462   |

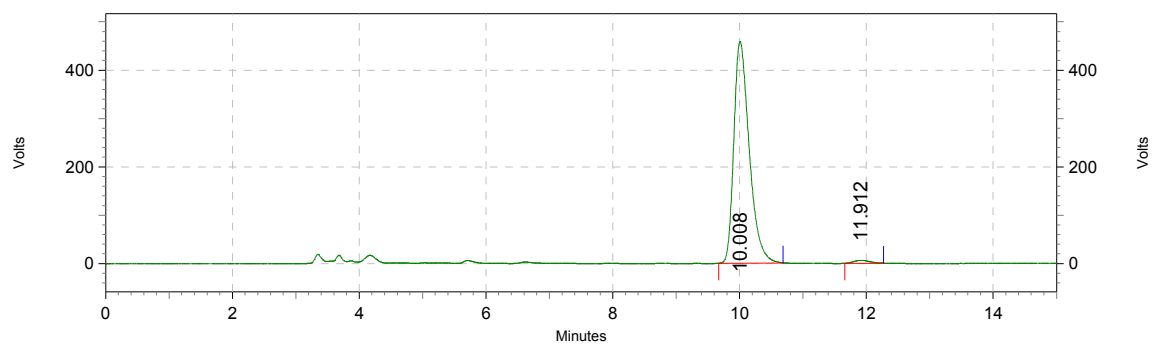

| Peak# | t <sub>R</sub> (min) | Area    | Area (%) |
|-------|----------------------|---------|----------|
| 1     | 10.008               | 7732100 | 98.682   |
| 2     | 11.912               | 103235  | 1.318    |

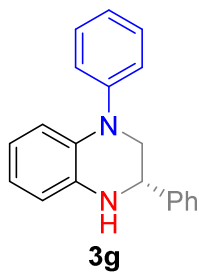

**(S)-1,3-diphenyl-1,2,3,4-tetrahydroquinoxaline**

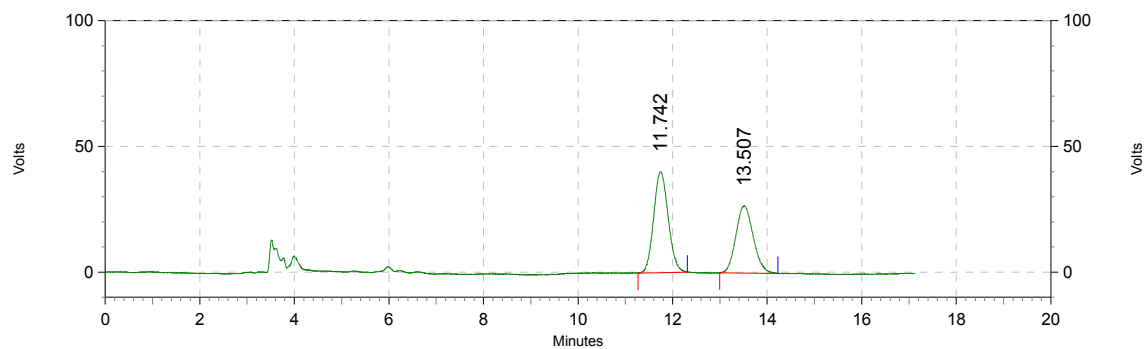

| Peak# | t <sub>R</sub> (min) | Area   | Area (%) |
|-------|----------------------|--------|----------|
| 1     | 11.742               | 855448 | 55.590   |
| 2     | 13.507               | 683409 | 44.410   |

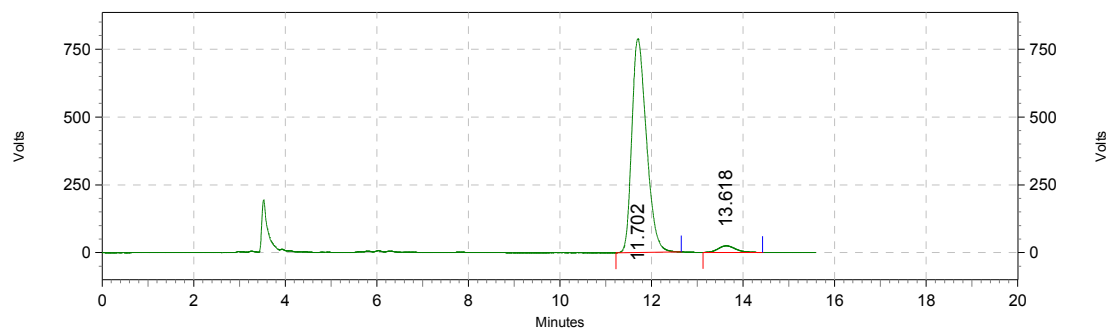

| Peak# | t <sub>R</sub> (min) | Area     | Area (%) |
|-------|----------------------|----------|----------|
| 1     | 11.702               | 17448937 | 96.468   |
| 2     | 13.618               | 638831   | 3.532    |

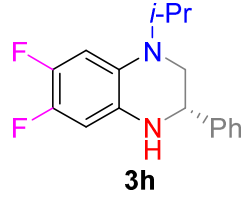

**(S)-6,7-difluoro-1-isopropyl-3-phenyl-1,2,3,4-tetrahydroquinoxaline**

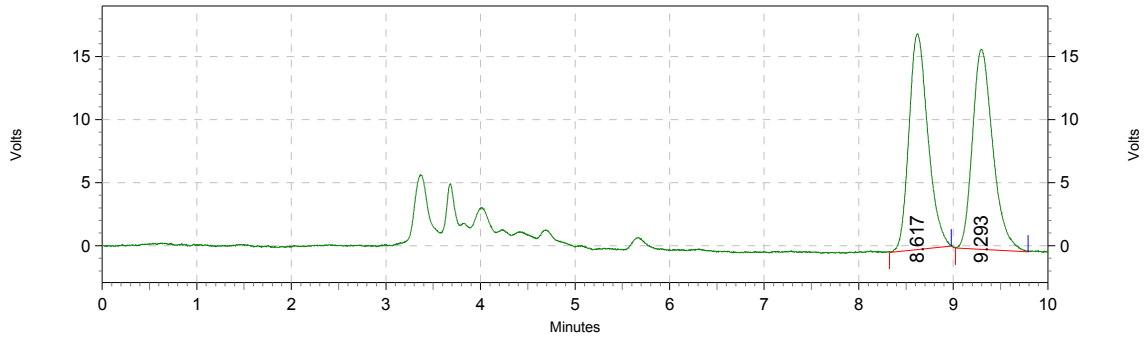

| Peak# | t <sub>R</sub> (min) | Area   | Area (%) |
|-------|----------------------|--------|----------|
| 1     | 8.617                | 237588 | 50.011   |
| 2     | 9.293                | 237485 | 49.989   |

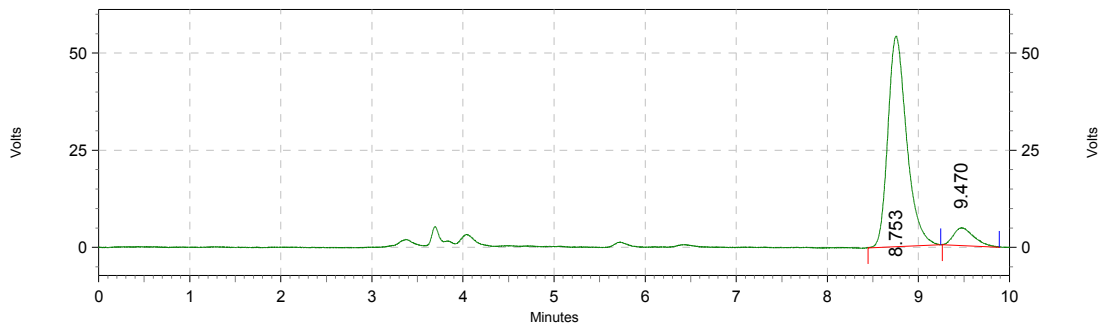

| Peak# | t <sub>R</sub> (min) | Area   | Area (%) |
|-------|----------------------|--------|----------|
| 1     | 8.753                | 775564 | 91.657   |
| 2     | 9.470                | 70593  | 8.343    |

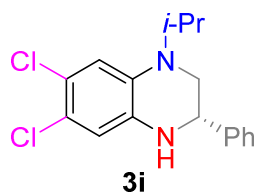

**(S)-6,7-dichloro-1-isopropyl-3-phenyl-1,2,3,4-tetrahydroquinoline**

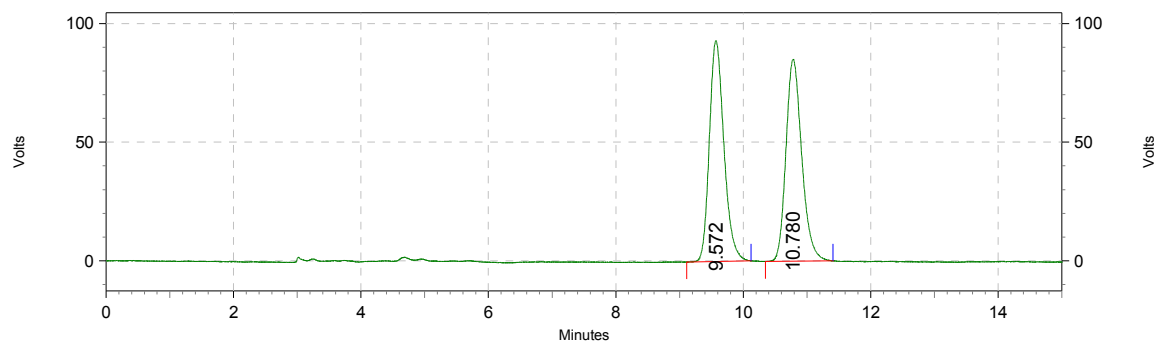

| Peak# | t <sub>R</sub> (min) | Area    | Area (%) |
|-------|----------------------|---------|----------|
| 1     | 9.572                | 1480019 | 50.147   |
| 2     | 10.780               | 1471326 | 49.853   |

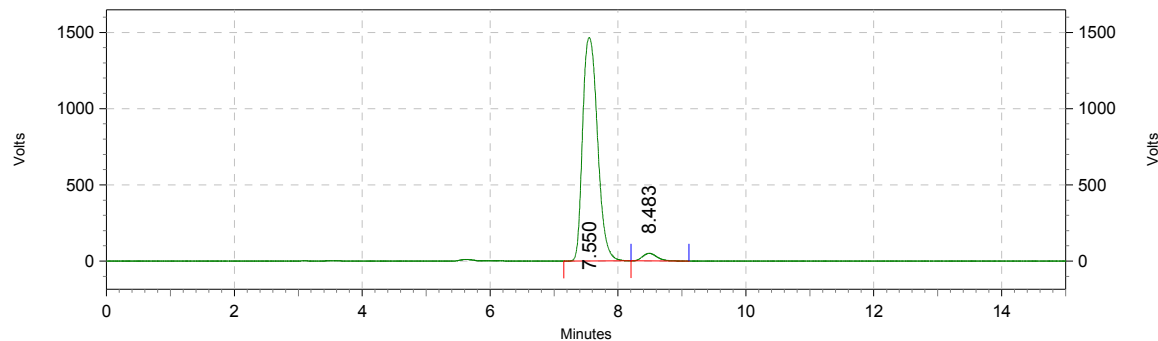

| Peak# | t <sub>R</sub> (min) | Area     | Area (%) |
|-------|----------------------|----------|----------|
| 1     | 7.550                | 23729277 | 96.859   |
| 2     | 8.483                | 769610   | 3.141    |



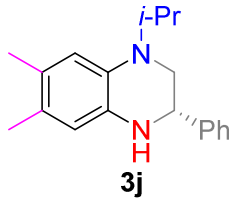

**(S)-1-isopropyl-6,7-dimethyl-3-phenyl-1,2,3,4-tetrahydroquinoxaline**

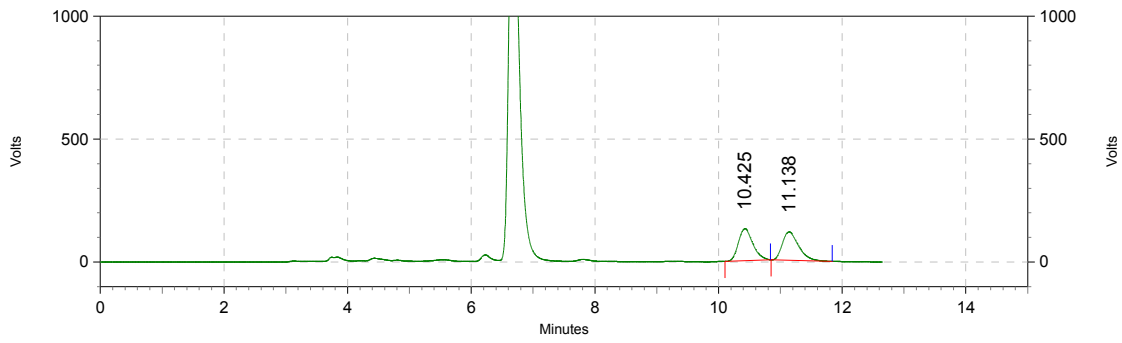

| Peak# | t <sub>R</sub> (min) | Area    | Area (%) |
|-------|----------------------|---------|----------|
| 1     | 10.425               | 2122743 | 50.195   |
| 2     | 11.138               | 2106243 | 49.805   |

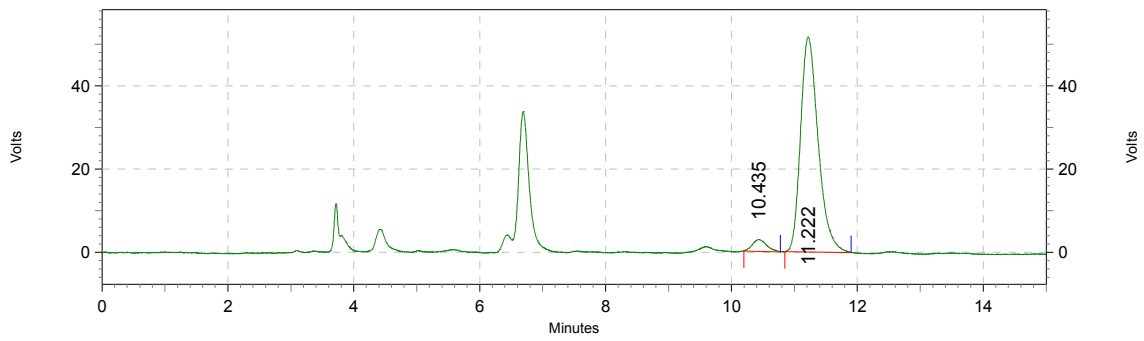

| Peak# | t <sub>R</sub> (min) | Area    | Area (%) |
|-------|----------------------|---------|----------|
| 1     | 10.435               | 44715   | 4.272    |
| 2     | 11.222               | 1001914 | 95.728   |

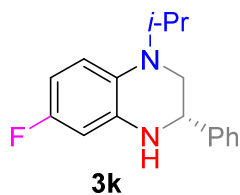

**(S)-6-fluoro-1-isopropyl-3-phenyl-1,2,3,4-tetrahydroquinoline**

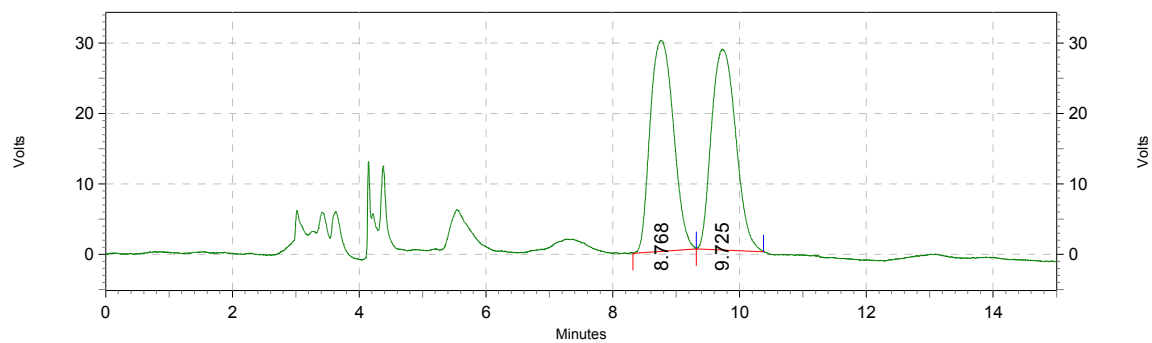

| Peak# | t <sub>R</sub> (min) | Area   | Area (%) |
|-------|----------------------|--------|----------|
| 1     | 8.768                | 767149 | 50.210   |
| 2     | 9.725                | 760723 | 49.790   |

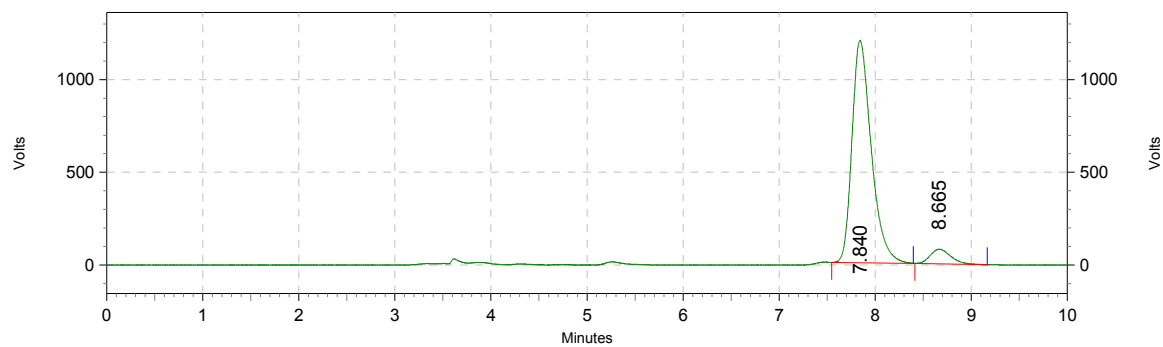

| Peak# | t <sub>R</sub> (min) | Area     | Area (%) |
|-------|----------------------|----------|----------|
| 1     | 7.840                | 16710902 | 93.474   |
| 2     | 8.665                | 1166660  | 6.526    |

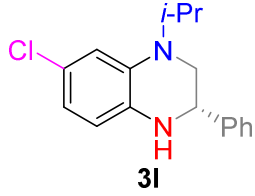

**(S)**-7-chloro-1-isopropyl-3-phenyl-1,2,3,4-tetrahydroquinoxaline

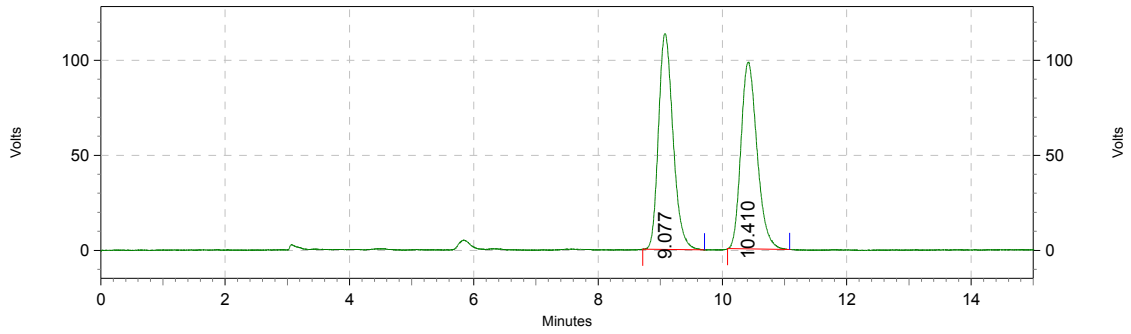

| Peak# | t <sub>R</sub> (min) | Area    | Area (%) |
|-------|----------------------|---------|----------|
| 1     | 9.077                | 1846866 | 50.986   |
| 2     | 10.410               | 1775429 | 49.014   |

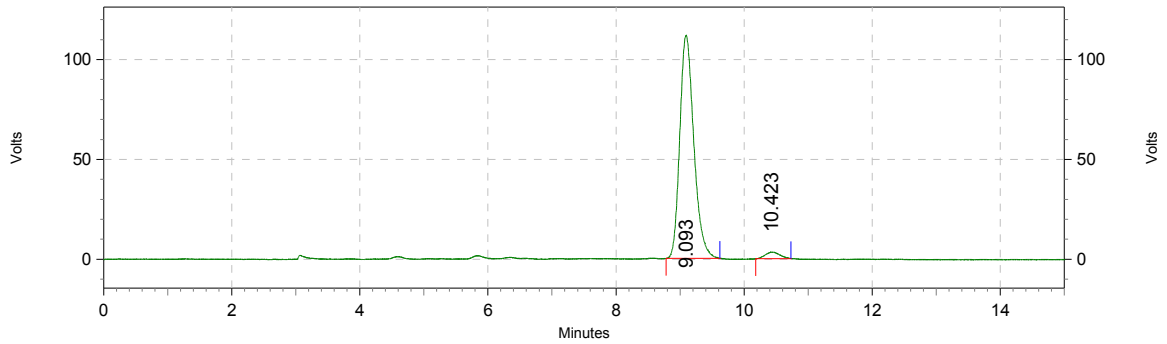

| Peak# | t <sub>R</sub> (min) | Area    | Area (%) |
|-------|----------------------|---------|----------|
| 1     | 9.093                | 1698256 | 96.971   |
| 2     | 10.423               | 53041   | 3.029    |

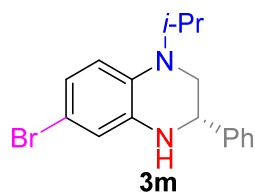

**(S)-6-bromo-1-isopropyl-3-phenyl-1,2,3,4-tetrahydroquinoxaline**

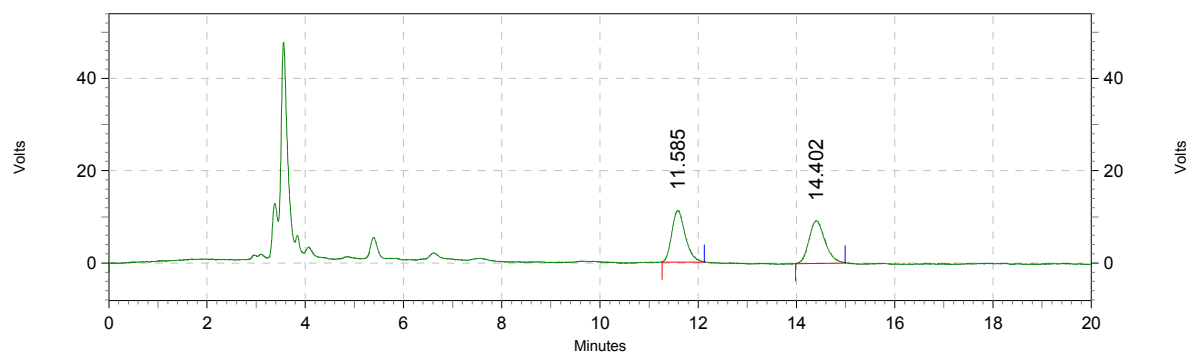

| Peak# | t <sub>R</sub> (min) | Area   | Area (%) |
|-------|----------------------|--------|----------|
| 1     | 11.585               | 212874 | 50.465   |
| 2     | 14.402               | 208949 | 49.535   |

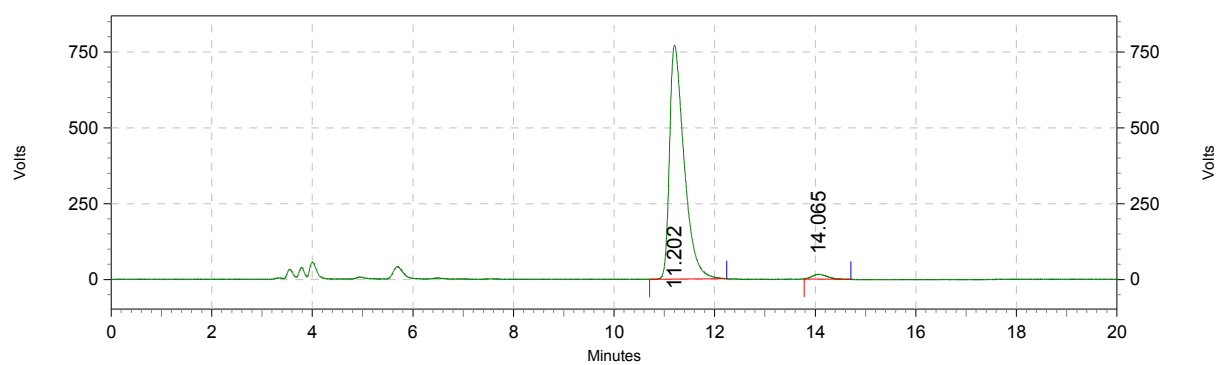

| Peak# | t <sub>R</sub> (min) | Area     | Area (%) |
|-------|----------------------|----------|----------|
| 1     | 11.202               | 15507407 | 97.978   |
| 2     | 14.065               | 319953   | 2.022    |

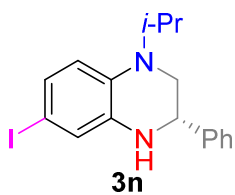

**(S)-6-iodo-1-isopropyl-3-phenyl-1,2,3,4-tetrahydroquinoline**

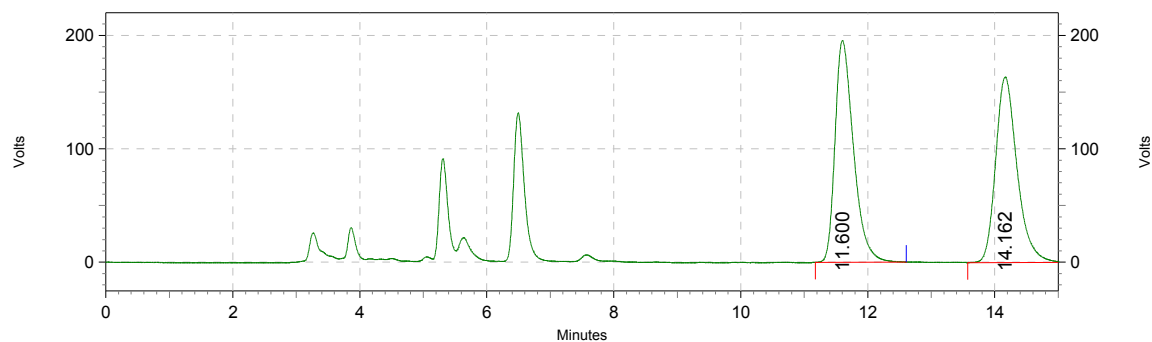

| Peak# | t <sub>R</sub> (min) | Area    | Area (%) |
|-------|----------------------|---------|----------|
| 1     | 11.600               | 3948980 | 50.705   |
| 2     | 14.162               | 3839216 | 49.295   |

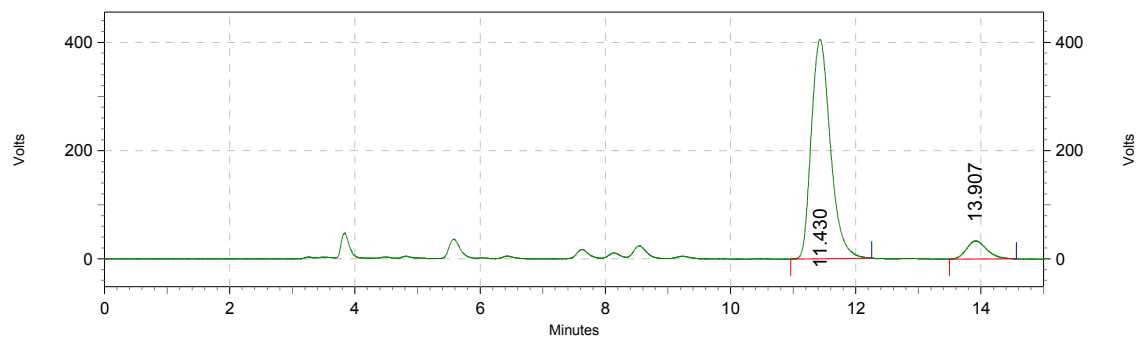

| Peak# | t <sub>R</sub> (min) | Area    | Area (%) |
|-------|----------------------|---------|----------|
| 1     | 11.430               | 8556139 | 91.909   |
| 2     | 13.907               | 753209  | 8.091    |

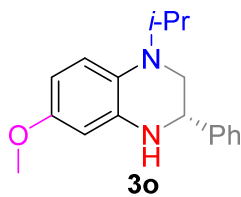

**(S)**-1-isopropyl-6-methoxy-3-phenyl-1,2,3,4-tetrahydroquinoxaline

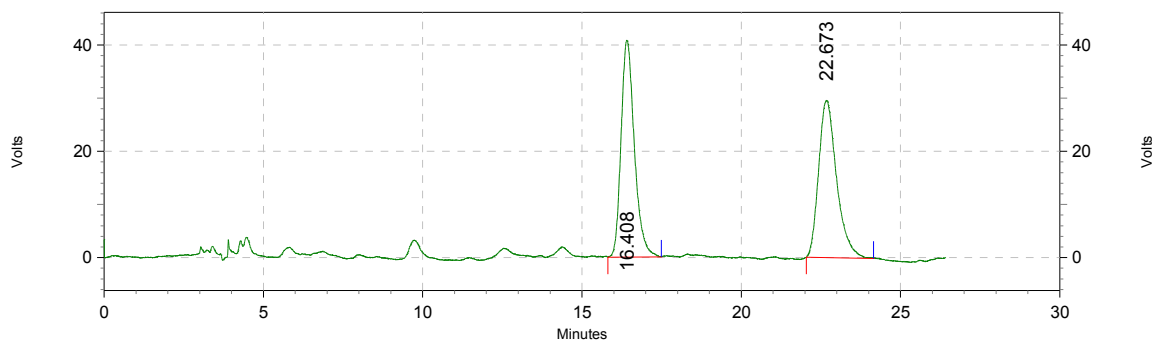

| Peak# | t <sub>R</sub> (min) | Area    | Area (%) |
|-------|----------------------|---------|----------|
| 1     | 16.408               | 1184751 | 50.596   |
| 2     | 22.673               | 1156848 | 49.404   |

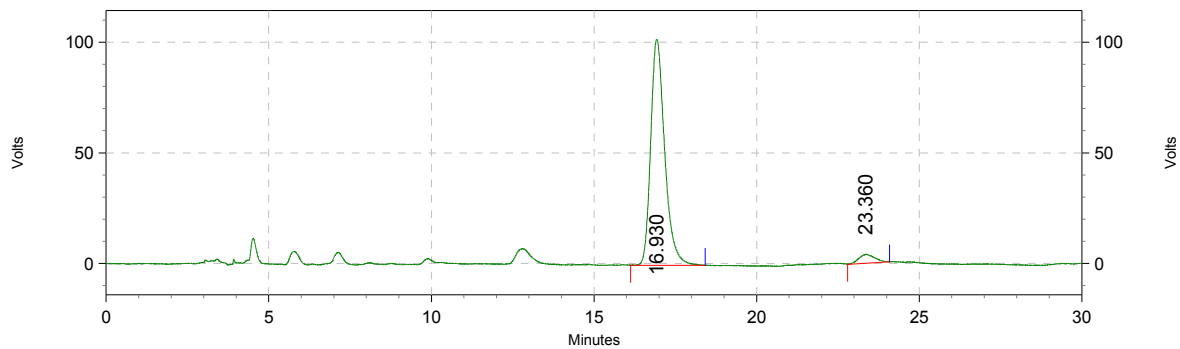

| Peak# | t <sub>R</sub> (min) | Area    | Area (%) |
|-------|----------------------|---------|----------|
| 1     | 16.930               | 3051360 | 95.676   |
| 2     | 23.360               | 137902  | 4.324    |

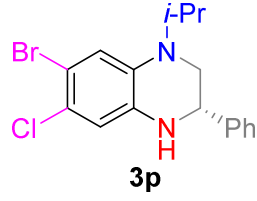

**(S)**-7-bromo-6-chloro-1-isopropyl-3-phenyl-1,2,3,4-tetrahydroquinoxaline

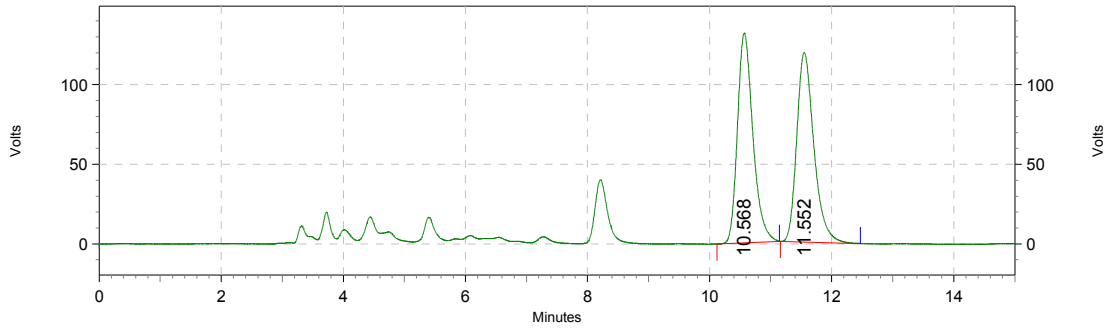

| Peak# | t <sub>R</sub> (min) | Area    | Area (%) |
|-------|----------------------|---------|----------|
| 1     | 10.568               | 2315664 | 49.931   |
| 2     | 11.552               | 2322061 | 50.069   |

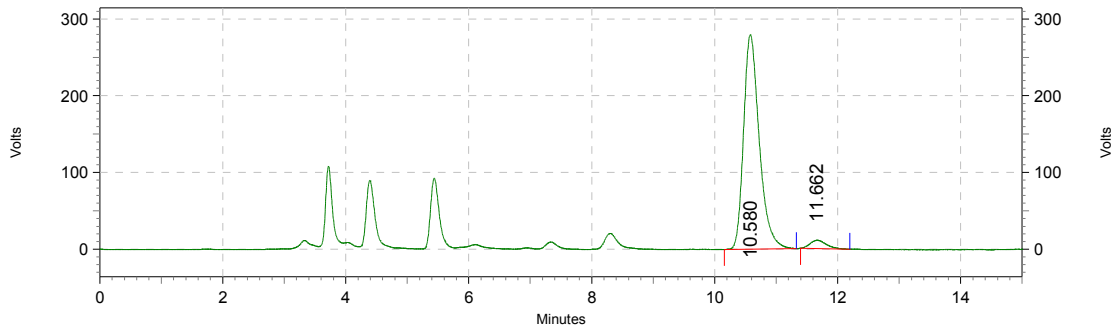

| Peak# | t <sub>R</sub> (min) | Area    | Area (%) |
|-------|----------------------|---------|----------|
| 1     | 10.580               | 4943535 | 96.110   |
| 2     | 11.662               | 200095  | 3.890    |

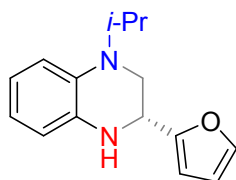**3q****(S)**-3-(furan-2-yl)-1-isopropyl-1,2,3,4-tetrahydroquinoxaline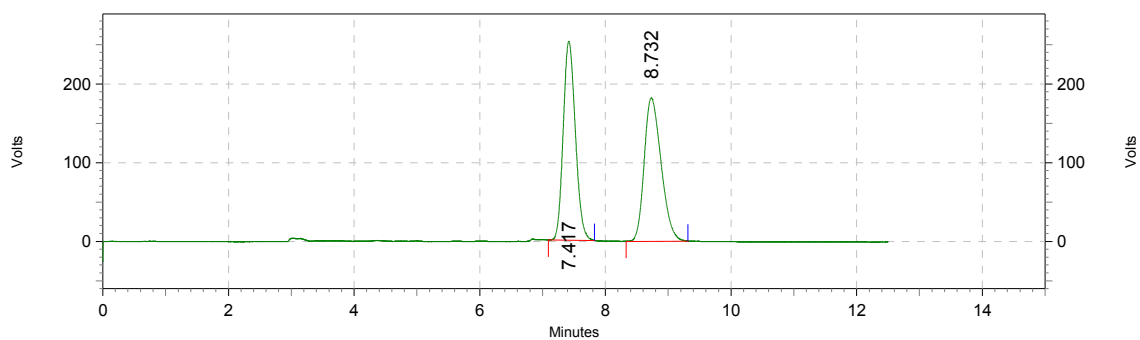

| Peak# | t <sub>R</sub> (min) | Area    | Area (%) |
|-------|----------------------|---------|----------|
| 1     | 7.417                | 3392535 | 49.881   |
| 2     | 8.732                | 3408730 | 50.119   |

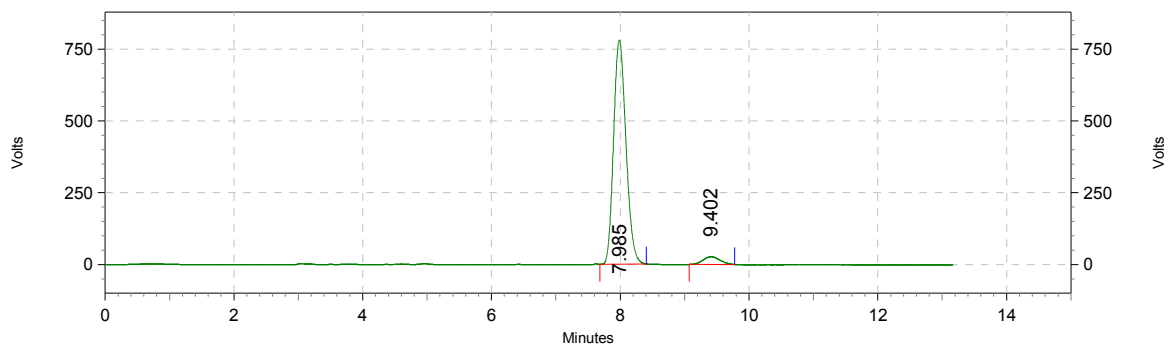

| Peak# | t <sub>R</sub> (min) | Area     | Area (%) |
|-------|----------------------|----------|----------|
| 1     | 7.985                | 10386163 | 95.441   |
| 2     | 9.402                | 496144   | 4.559    |



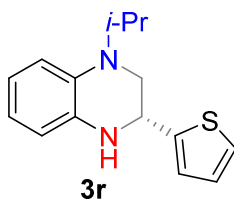

**(S)-1-isopropyl-3-(thiophen-2-yl)-1,2,3,4-tetrahydroquinoline**

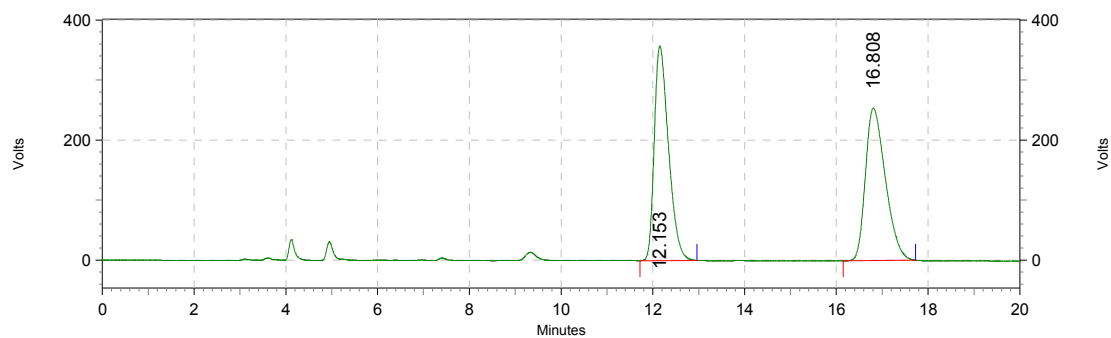

| Peak# | t <sub>R</sub> (min) | Area    | Area (%) |
|-------|----------------------|---------|----------|
| 1     | 12.153               | 7700964 | 50.071   |
| 2     | 16.808               | 7679138 | 49.929   |

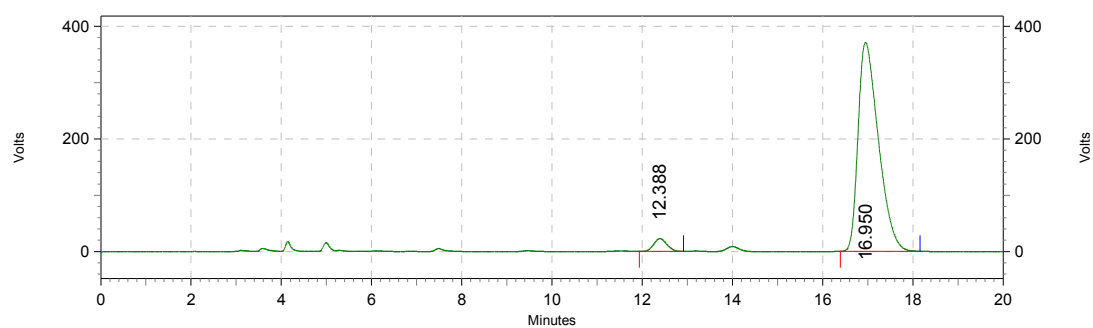

| Peak# | t <sub>R</sub> (min) | Area     | Area (%) |
|-------|----------------------|----------|----------|
| 1     | 12.388               | 466860   | 3.866    |
| 2     | 16.950               | 11607712 | 96.134   |

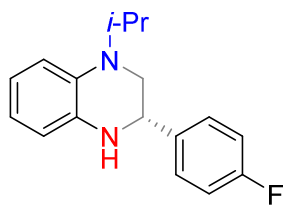

**3s**

**(S)-3-(4-fluorophenyl)-1-isopropyl-1,2,3,4-tetrahydroquinoxaline**

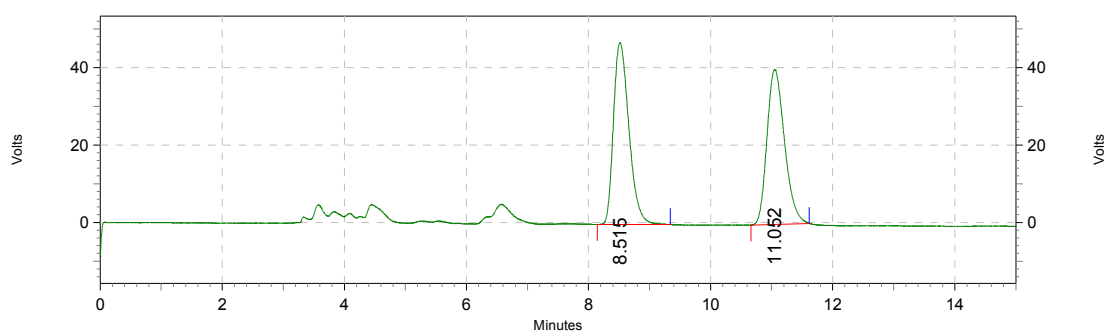

| Peak# | t <sub>R</sub> (min) | Area   | Area (%) |
|-------|----------------------|--------|----------|
| 1     | 8.515                | 824710 | 50.826   |
| 2     | 11.052               | 797897 | 49.174   |

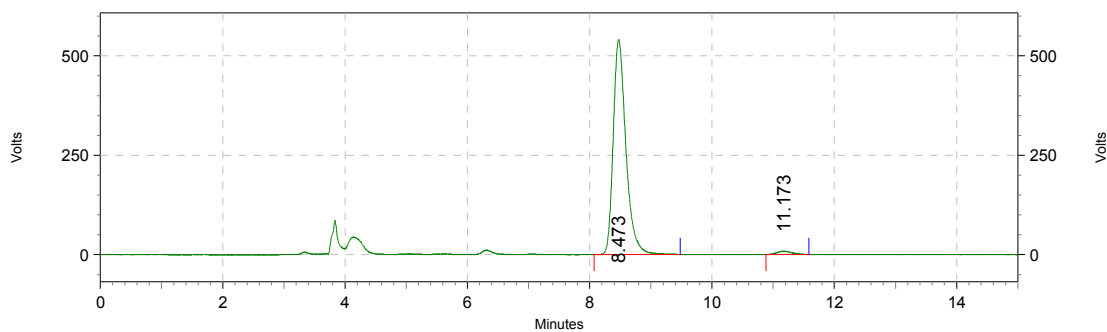

| Peak# | t <sub>R</sub> (min) | Area    | Area (%) |
|-------|----------------------|---------|----------|
| 1     | 8.473                | 7771545 | 98.177   |
| 2     | 11.173               | 144291  | 1.823    |

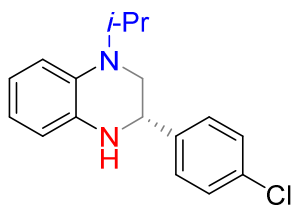

**3t**

**(S)-3-(4-chlorophenyl)-1-isopropyl-1,2,3,4-tetrahydroquinoxaline**

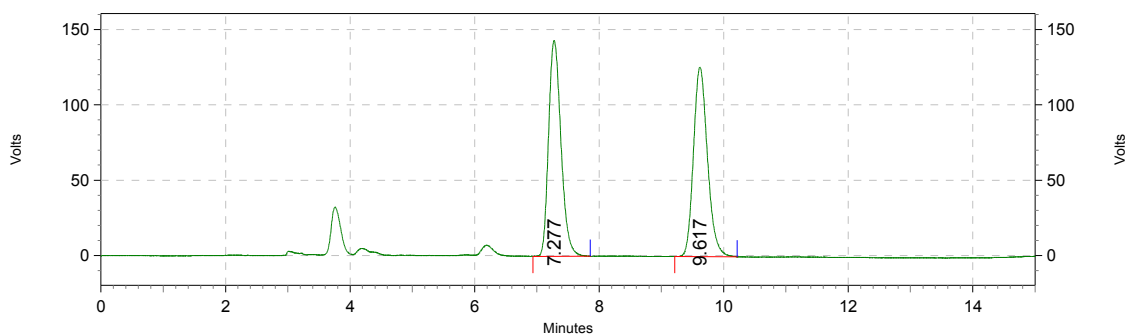

| Peak# | t <sub>R</sub> (min) | Area    | Area (%) |
|-------|----------------------|---------|----------|
| 1     | 7.277                | 1980679 | 50.191   |
| 2     | 9.617                | 1965584 | 49.809   |

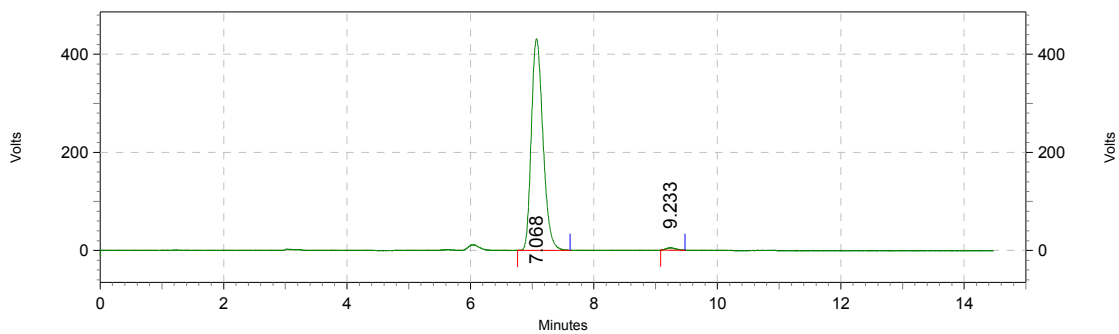

| Peak# | t <sub>R</sub> (min) | Area    | Area (%) |
|-------|----------------------|---------|----------|
| 1     | 7.068                | 5643367 | 99.107   |
| 2     | 9.233                | 50874   | 0.893    |

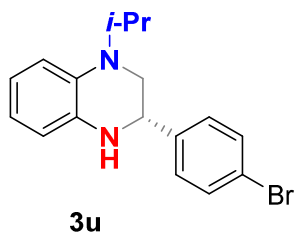

**(S)-3-(4-bromophenyl)-1-isopropyl-1,2,3,4-tetrahydroquinoxaline**

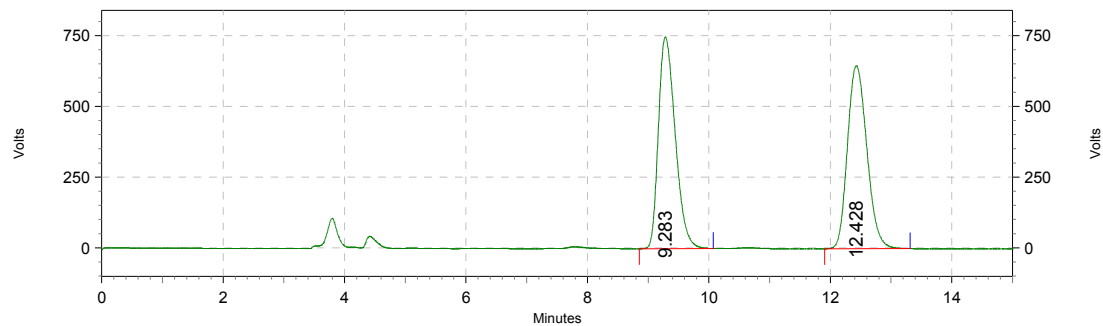

| Peak# | t <sub>R</sub> (min) | Area     | Area (%) |
|-------|----------------------|----------|----------|
| 1     | 9.283                | 14375099 | 50.055   |
| 2     | 12.428               | 14343717 | 49.945   |

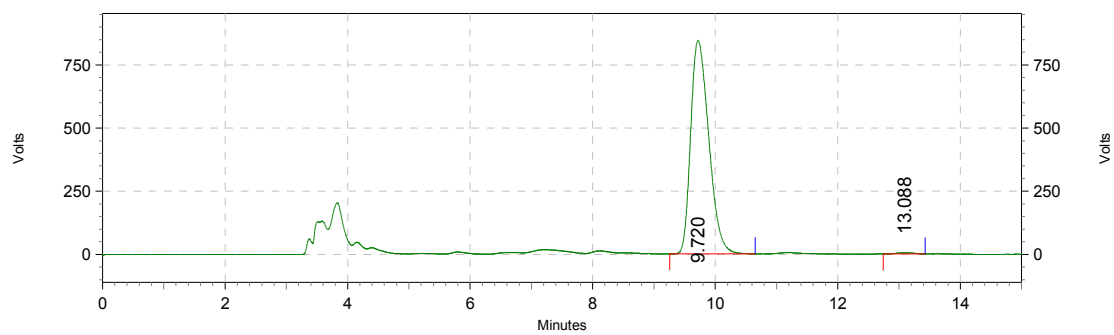

| Peak# | t <sub>R</sub> (min) | Area     | Area (%) |
|-------|----------------------|----------|----------|
| 1     | 9.720                | 17318158 | 99.553   |
| 2     | 13.088               | 77835    | 0.447    |

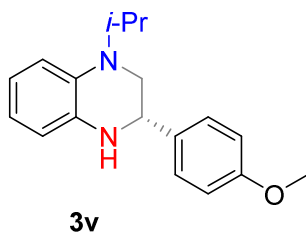

**(S)-1-isopropyl-3-(4-methoxyphenyl)-1,2,3,4-tetrahydroquinoline**

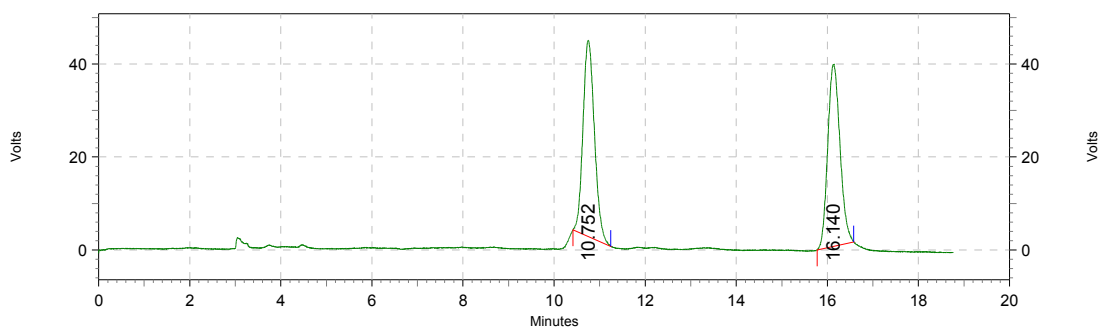

| Peak# | t <sub>R</sub> (min) | Area   | Area (%) |
|-------|----------------------|--------|----------|
| 1     | 10.752               | 736772 | 50.218   |
| 2     | 16.140               | 730364 | 49.782   |

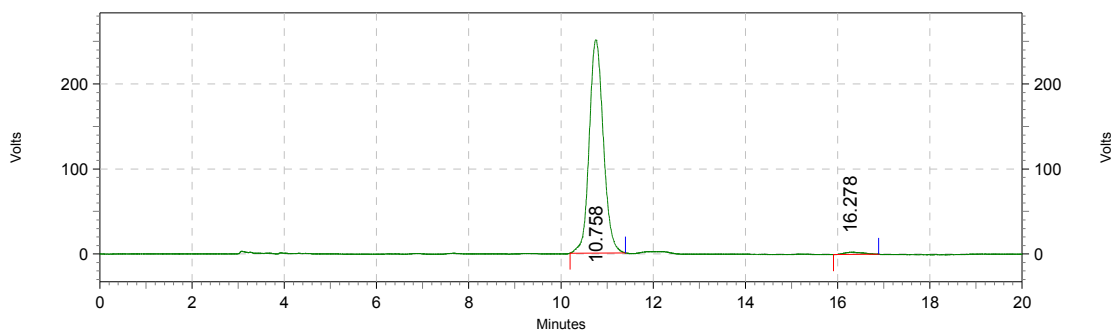

| Peak# | t <sub>R</sub> (min) | Area    | Area (%) |
|-------|----------------------|---------|----------|
| 1     | 10.758               | 5313205 | 98.577   |
| 2     | 16.278               | 76676   | 1.423    |

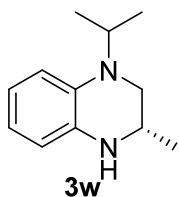

**(S)**-1-isopropyl-3-methyl-1,2,3,4-tetrahydroquinoline

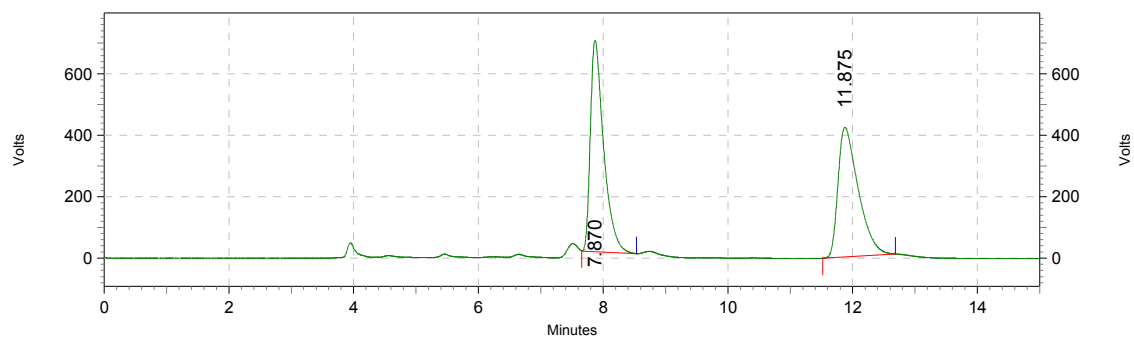

| Peak# | t <sub>R</sub> (min) | Area     | Area (%) |
|-------|----------------------|----------|----------|
| 1     | 7.870                | 10170319 | 51.763   |
| 2     | 11.875               | 9477508  | 48.237   |

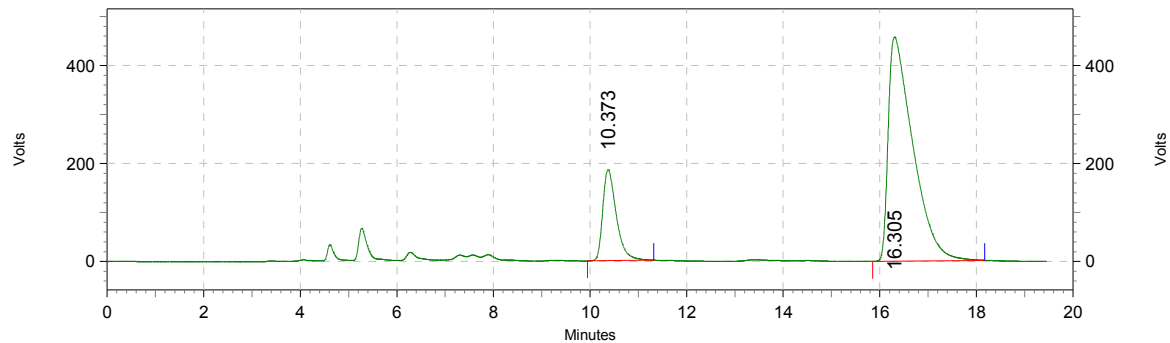

| Peak# | t <sub>R</sub> (min) | Area     | Area (%) |
|-------|----------------------|----------|----------|
| 1     | 10.373               | 3620967  | 18.252   |
| 2     | 16.305               | 16217791 | 81.748   |

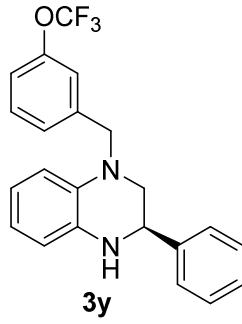

*(R)*-3-phenyl-1-(3-(trifluoromethoxy)benzyl)-1,2,3,4-tetrahydroquinoxaline

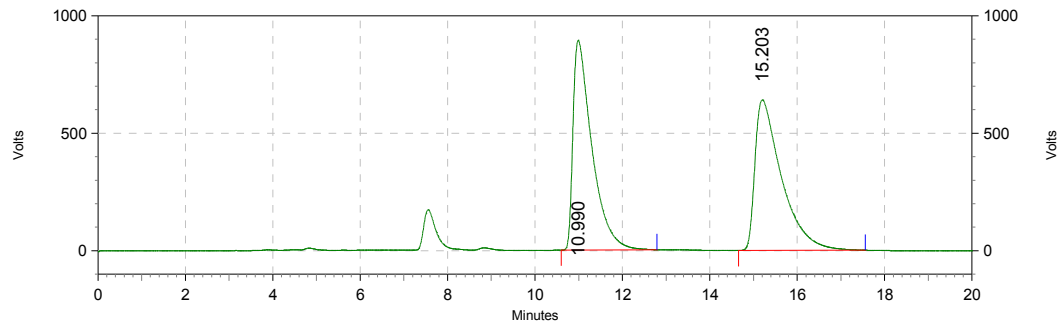

| Peak# | t <sub>R</sub> (min) | Area     | Area (%) |
|-------|----------------------|----------|----------|
| 1     | 10.990               | 26822883 | 49.788   |
| 2     | 15.203               | 27050988 | 50.212   |

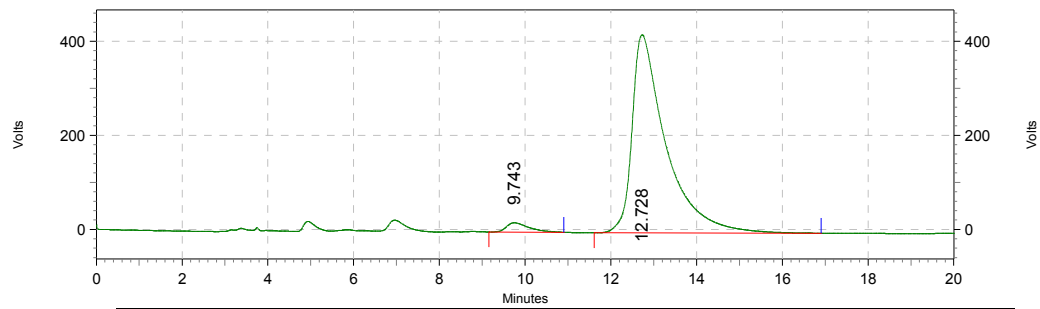

| Peak# | t <sub>R</sub> (min) | Area     | Area (%) |
|-------|----------------------|----------|----------|
| 1     | 9.743                | 721074   | 3.030    |
| 2     | 12.728               | 23073250 | 96.970   |

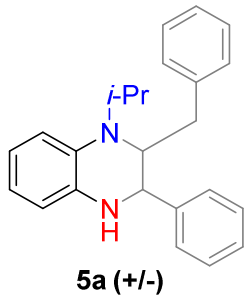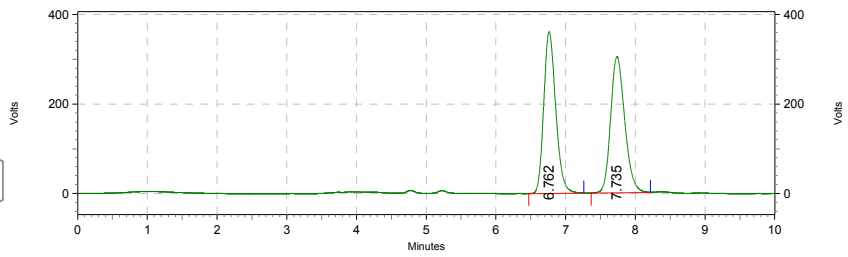

| Peak# | t <sub>R</sub> (min) | Area    | Area (%) |
|-------|----------------------|---------|----------|
| 1     | 6.762                | 4315264 | 50.267   |
| 2     | 7.735                | 4269416 | 49.733   |

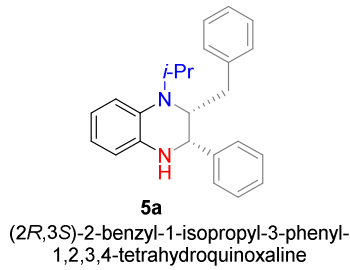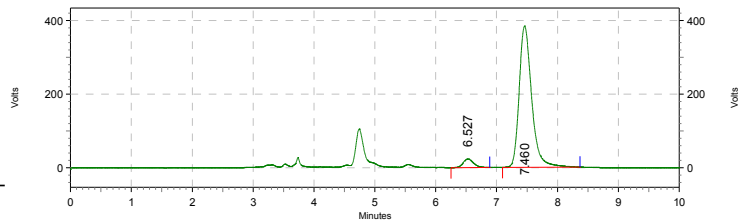

| Peak# | t <sub>R</sub> (min) | Area    | Area (%) |
|-------|----------------------|---------|----------|
| 1     | 6.527                | 275045  | 4.779    |
| 2     | 7.460                | 5480827 | 95.221   |

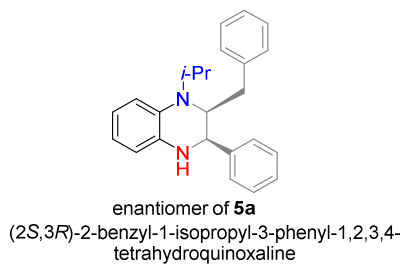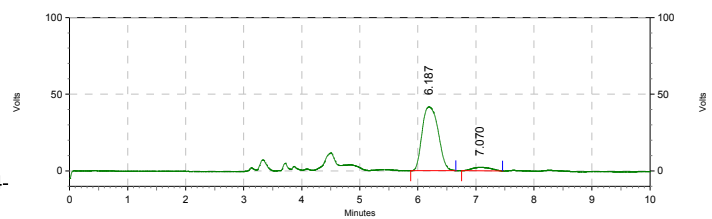

| Peak# | t <sub>R</sub> (min) | Area   | Area (%) |
|-------|----------------------|--------|----------|
| 1     | 6.187                | 800085 | 93.796   |
| 2     | 7.070                | 52922  | 6.204    |



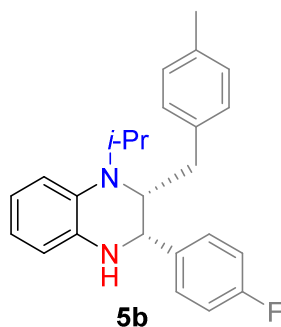

**(2R,3S)-3-(4-fluorophenyl)-1-isopropyl-2-(4-methylbenzyl)-1,2,3,4-tetrahydroquinoxaline**

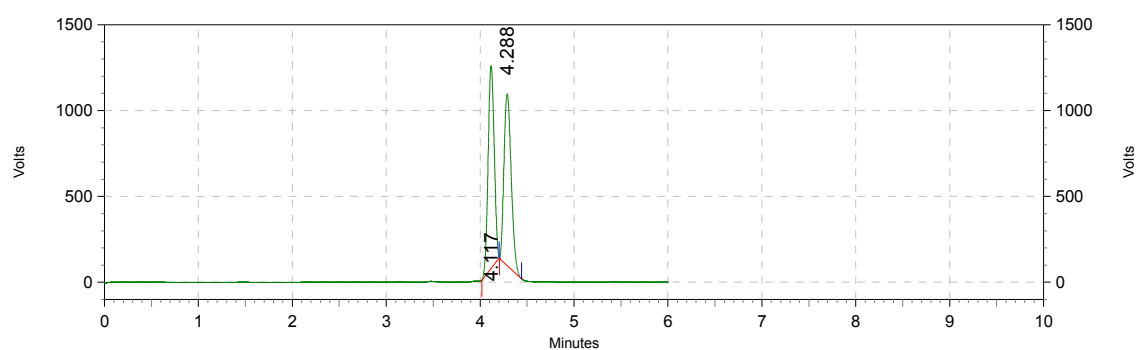

| Peak# | t <sub>R</sub> (min) | Area    | Area (%) |
|-------|----------------------|---------|----------|
| 1     | 4.117                | 5331173 | 49.886   |
| 2     | 4.288                | 5355551 | 50.114   |

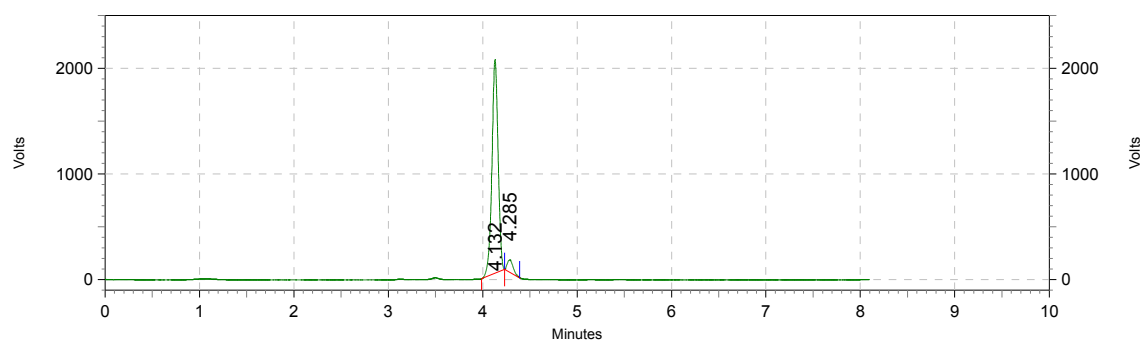

| Peak# | t <sub>R</sub> (min) | Area    | Area (%) |
|-------|----------------------|---------|----------|
| 1     | 4.132                | 9183271 | 94.781   |
| 2     | 4.285                | 505695  | 5.219    |

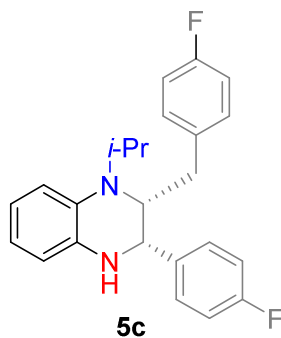

**(2R,3S)-2-(4-fluorobenzyl)-3-(4-fluorophenyl)-1-isopropyl-1,2,3,4-tetrahydroquinoline**

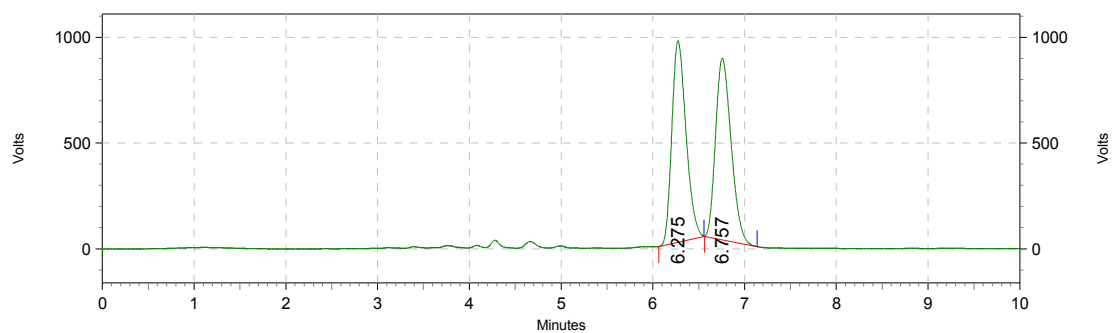

| Peak# | t <sub>R</sub> (min) | Area     | Area (%) |
|-------|----------------------|----------|----------|
| 1     | 6.275                | 10204949 | 50.217   |
| 2     | 6.757                | 10116907 | 49.783   |

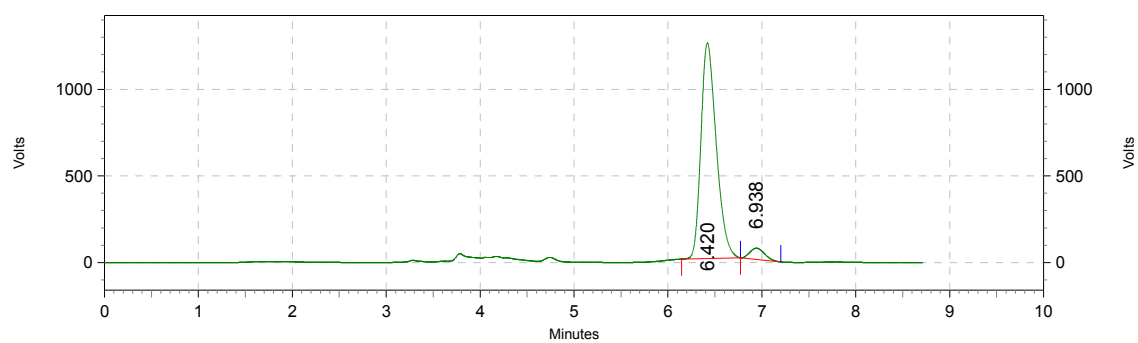

| Peak# | t <sub>R</sub> (min) | Area     | Area (%) |
|-------|----------------------|----------|----------|
| 1     | 6.420                | 14112330 | 95.213   |
| 2     | 6.938                | 709584   | 4.787    |

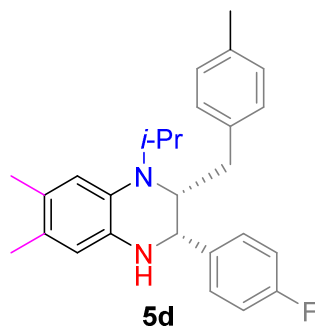

**(2R,3S)-3-(4-fluorophenyl)-1-isopropyl-6,7-dimethyl-2-(4-methylbenzyl)-1,2,3,4-tetrahydroquinoxaline**

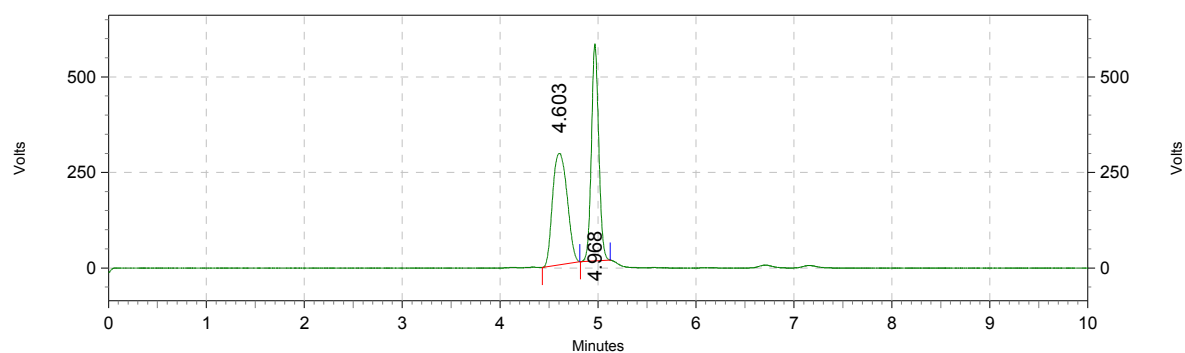

| Peak# | t <sub>R</sub> (min) | Area    | Area (%) |
|-------|----------------------|---------|----------|
| 1     | 4.603                | 3014356 | 50.426   |
| 2     | 4.968                | 2963375 | 49.574   |

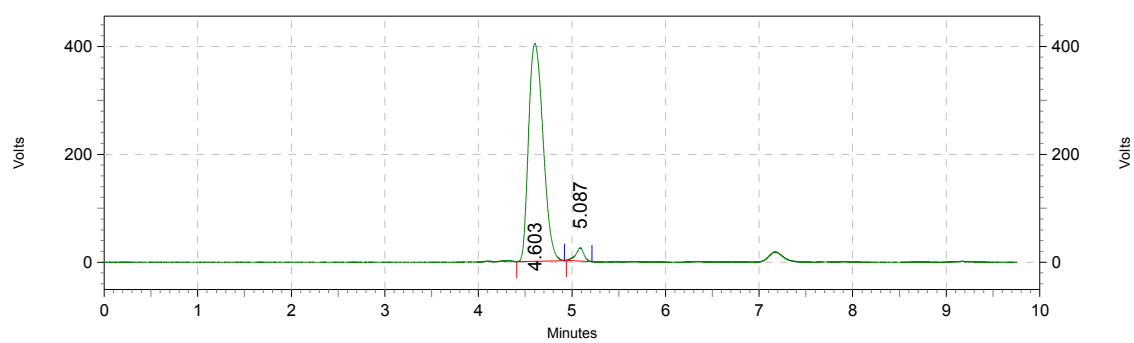

| Peak# | t <sub>R</sub> (min) | Area    | Area (%) |
|-------|----------------------|---------|----------|
| 1     | 4.603                | 4343730 | 96.702   |
| 2     | 5.087                | 148143  | 3.298    |

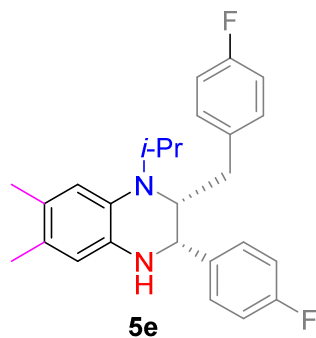

**(2R,3S)-2-(4-fluorobenzyl)-3-(4-fluorophenyl)-1-isopropyl-6,7-dimethyl-1,2,3,4-tetrahydroquinoline**

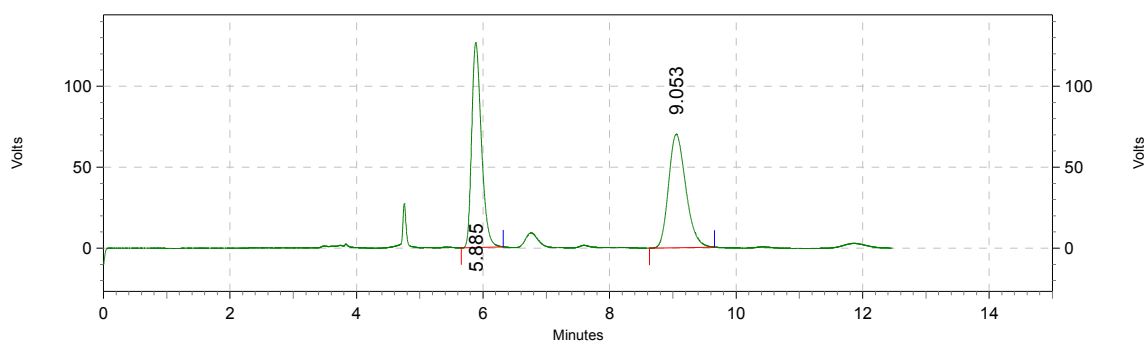

| Peak# | t <sub>R</sub> (min) | Area    | Area (%) |
|-------|----------------------|---------|----------|
| 1     | 5.885                | 1339845 | 50.270   |
| 2     | 9.053                | 1325474 | 49.730   |

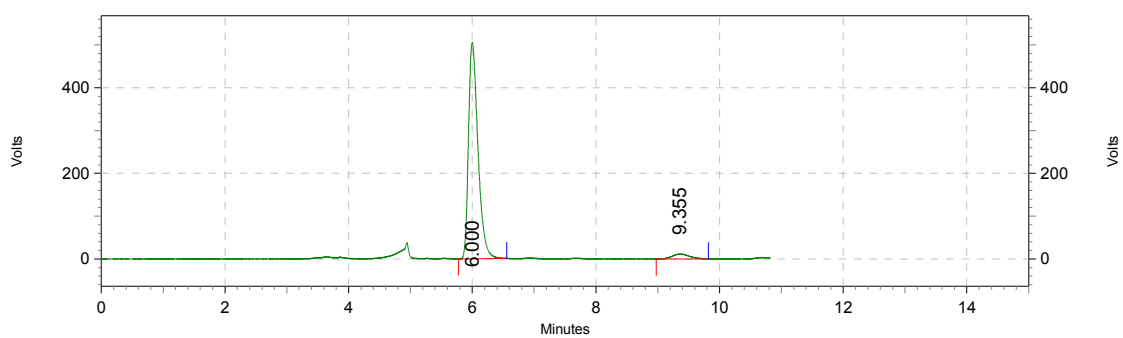

| Peak# | t <sub>R</sub> (min) | Area    | Area (%) |
|-------|----------------------|---------|----------|
| 1     | 6.000                | 5372685 | 96.087   |
| 2     | 9.355                | 218782  | 3.913    |

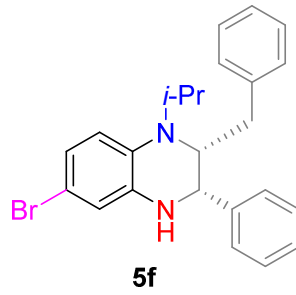

**(2R,3S)-2-benzyl-6-bromo-1-isopropyl-3-phenyl-1,2,3,4-tetrahydroquinoxaline**

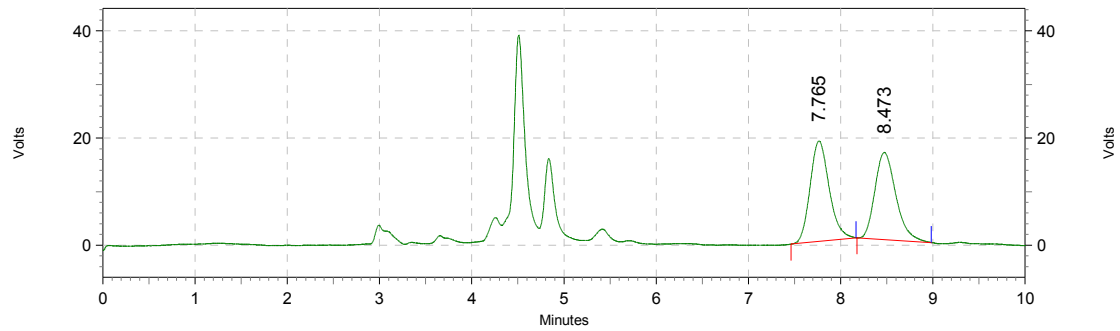

| Peak# | t <sub>R</sub> (min) | Area   | Area (%) |
|-------|----------------------|--------|----------|
| 1     | 7.765                | 269645 | 51.200   |
| 2     | 8.473                | 257006 | 48.800   |

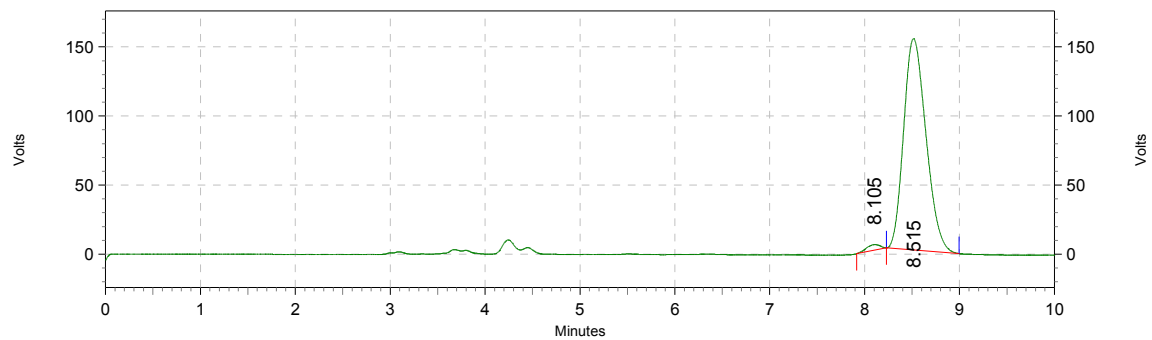

| Peak# | t <sub>R</sub> (min) | Area    | Area (%) |
|-------|----------------------|---------|----------|
| 1     | 8.105                | 41298   | 1.621    |
| 2     | 8.515                | 2506228 | 98.379   |

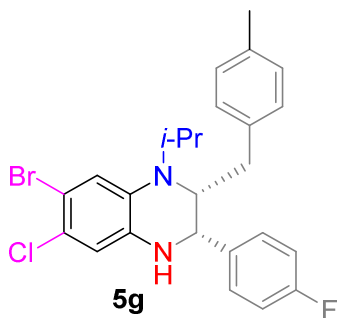

**(2*R*,3*S*)-7-bromo-6-chloro-3-(4-fluorophenyl)-1-isopropyl-2-(4-methylbenzyl)-1,2,3,4-tetrahydroquinoxaline**

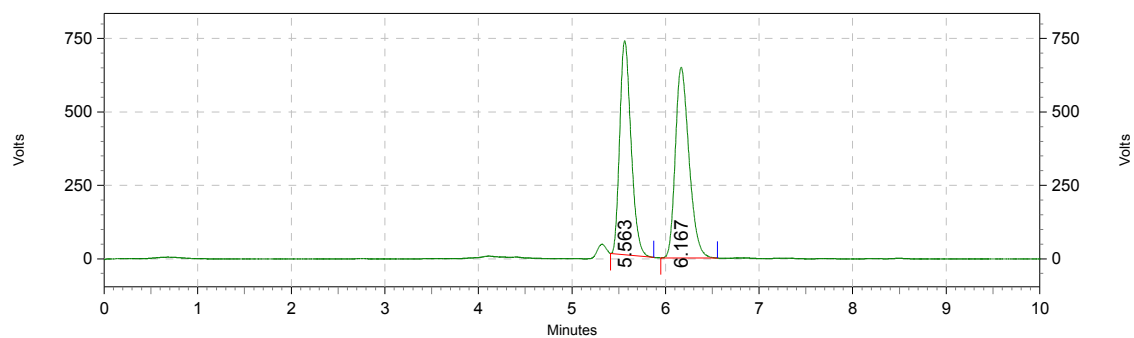

| Peak# | t <sub>R</sub> (min) | Area    | Area (%) |
|-------|----------------------|---------|----------|
| 1     | 5.563                | 6132292 | 48.096   |
| 2     | 6.167                | 6617934 | 51.904   |

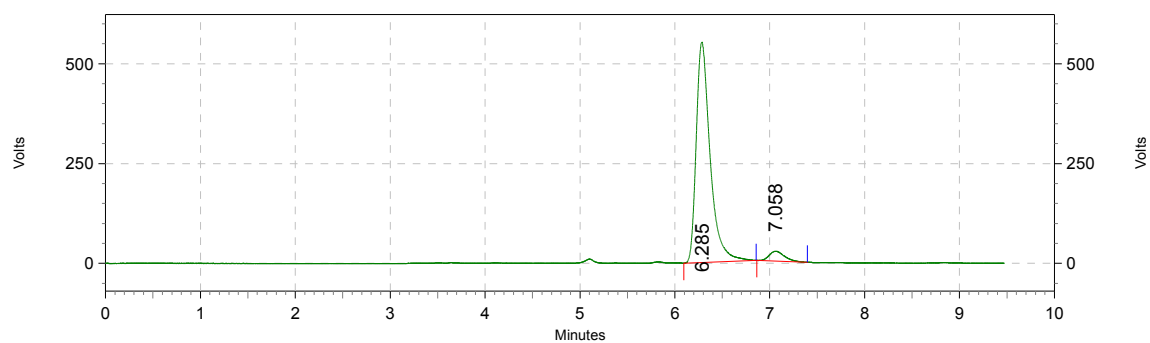

| Peak# | t <sub>R</sub> (min) | Area    | Area (%) |
|-------|----------------------|---------|----------|
| 1     | 6.285                | 5616480 | 95.240   |
| 2     | 7.058                | 280690  | 4.760    |

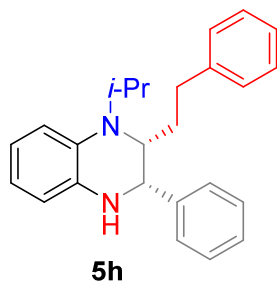

**(2R,3S)-1-isopropyl-2-phenethyl-3-phenyl-1,2,3,4-tetrahydroquinoline**

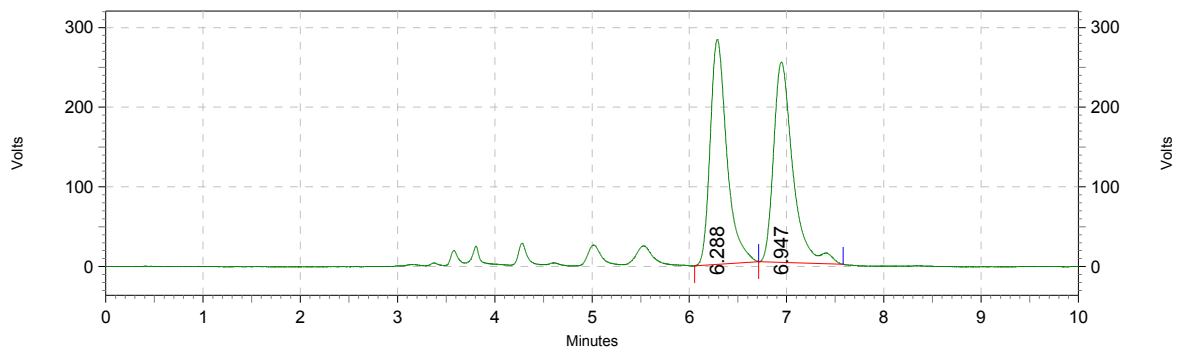

| Peak# | t <sub>R</sub> (min) | Area    | Area (%) |
|-------|----------------------|---------|----------|
| 1     | 6.288                | 3369335 | 49.248   |
| 2     | 6.947                | 3472188 | 50.752   |

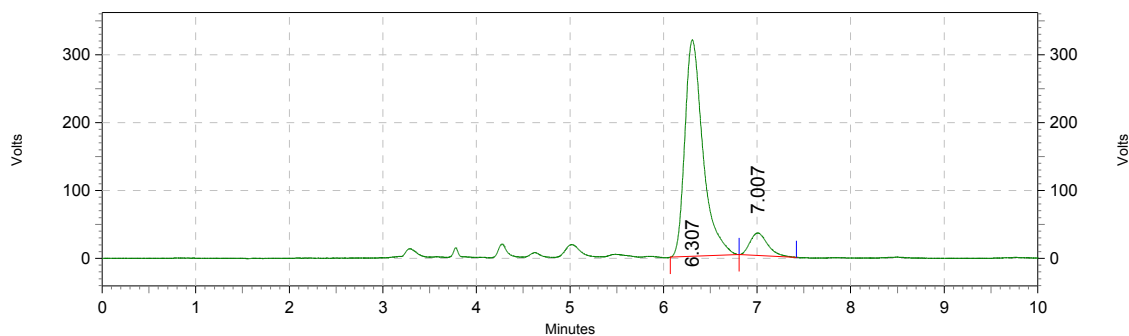

| Peak# | t <sub>R</sub> (min) | Area    | Area (%) |
|-------|----------------------|---------|----------|
| 1     | 6.307                | 4288656 | 90.742   |
| 2     | 7.007                | 437578  | 9.258    |

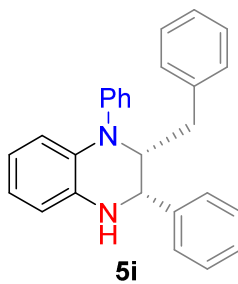

**(2*R*,3*S*)-2-benzyl-1,3-diphenyl-1,2,3,4-tetrahydroquinoline**

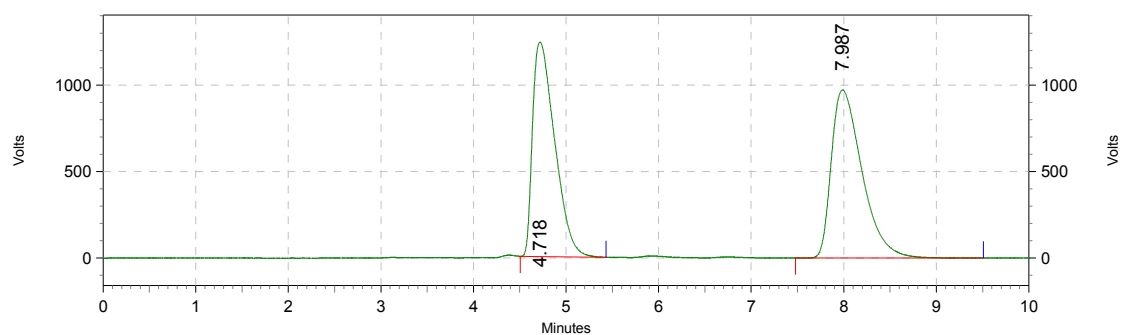

| Peak# | t <sub>R</sub> (min) | Area     | Area (%) |
|-------|----------------------|----------|----------|
| 1     | 4.718                | 20590253 | 47.977   |
| 2     | 7.987                | 22327021 | 52.023   |

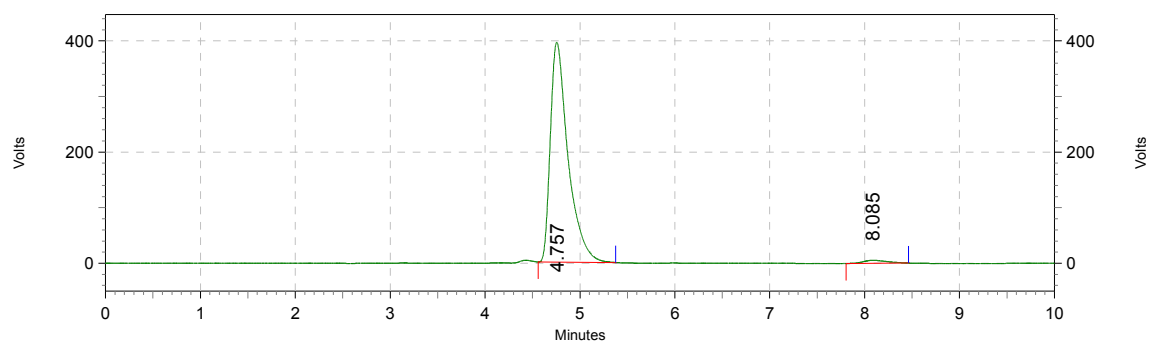

| Peak# | t <sub>R</sub> (min) | Area    | Area (%) |
|-------|----------------------|---------|----------|
| 1     | 4.757                | 5115169 | 98.218   |
| 2     | 8.085                | 92783   | 1.782    |



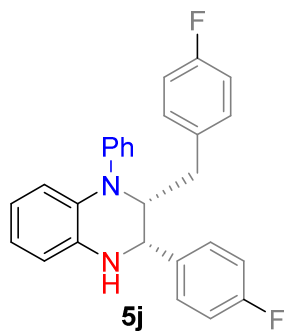

**(2R,3S)-2-(4-fluorobenzyl)-3-(4-fluorophenyl)-1-phenyl-1,2,3,4-tetrahydroquinoline**

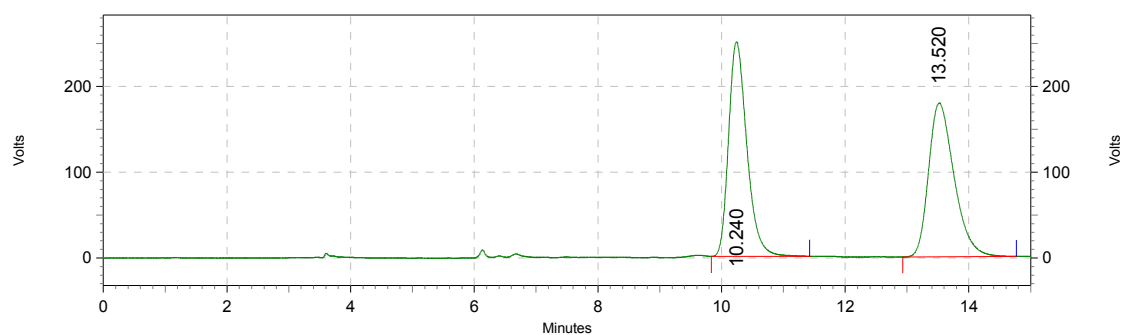

| Peak# | t <sub>R</sub> (min) | Area    | Area (%) |
|-------|----------------------|---------|----------|
| 1     | 10.240               | 5146496 | 50.047   |
| 2     | 13.520               | 5136776 | 49.953   |

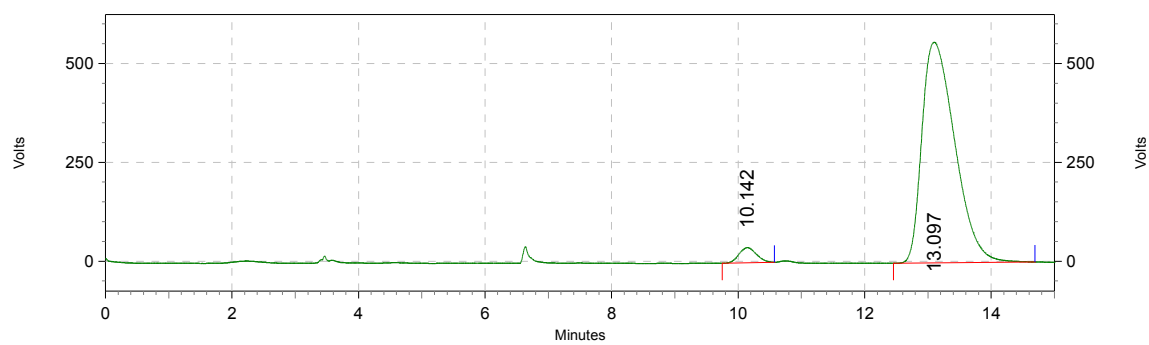

| Peak# | t <sub>R</sub> (min) | Area     | Area (%) |
|-------|----------------------|----------|----------|
| 1     | 10.142               | 736982   | 3.523    |
| 2     | 13.097               | 20181057 | 96.477   |

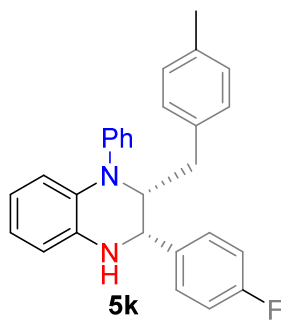

**(2R,3S)-3-(4-fluorophenyl)-2-(4-methylbenzyl)-1-phenyl-1,2,3,4-tetrahydroquinoxaline**

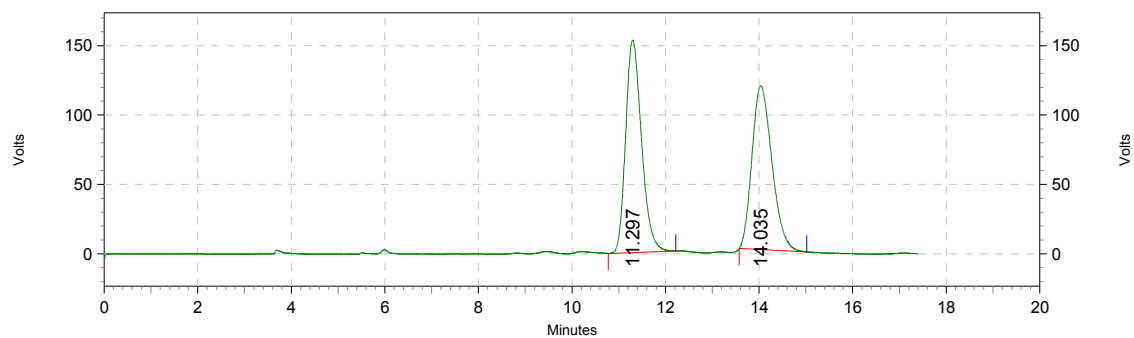

| Peak# | t <sub>R</sub> (min) | Area    | Area (%) |
|-------|----------------------|---------|----------|
| 1     | 11.297               | 3605898 | 50.795   |
| 2     | 14.035               | 3492960 | 49.205   |

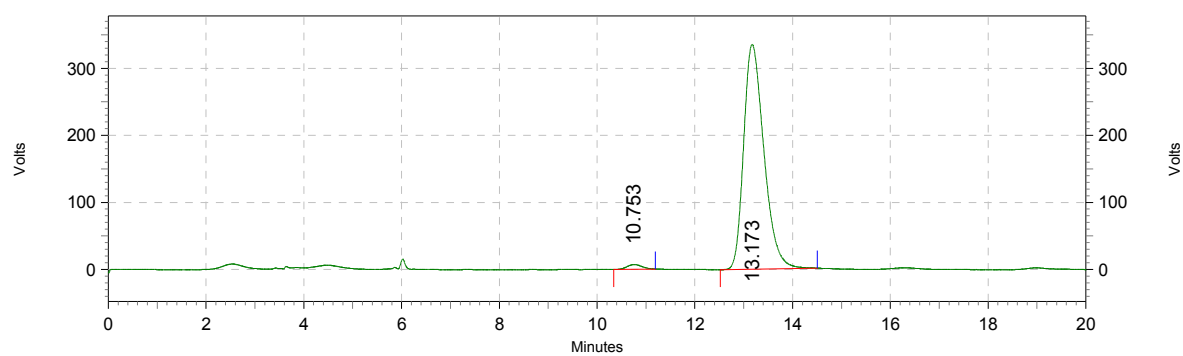

| Peak# | t <sub>R</sub> (min) | Area    | Area (%) |
|-------|----------------------|---------|----------|
| 1     | 10.753               | 149635  | 1.528    |
| 2     | 13.173               | 9643244 | 98.472   |

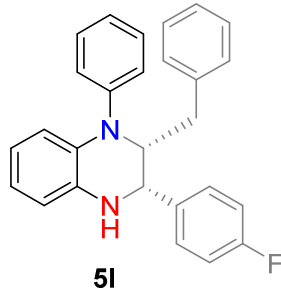

**(2R,3S)-2-benzyl-3-(4-fluorophenyl)-1-phenyl-1,2,3,4-tetrahydroquinoline**

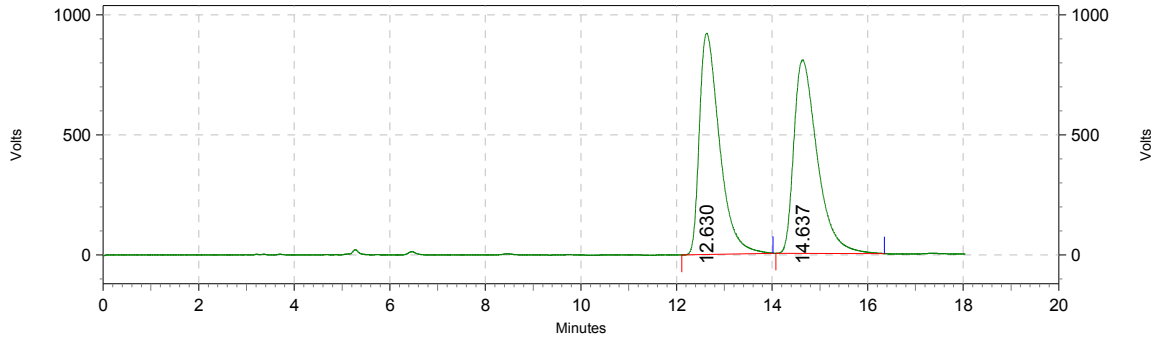

| Peak# | t <sub>R</sub> (min) | Area     | Area (%) |
|-------|----------------------|----------|----------|
| 1     | 12.630               | 26892624 | 49.507   |
| 2     | 14.637               | 27427905 | 50.493   |

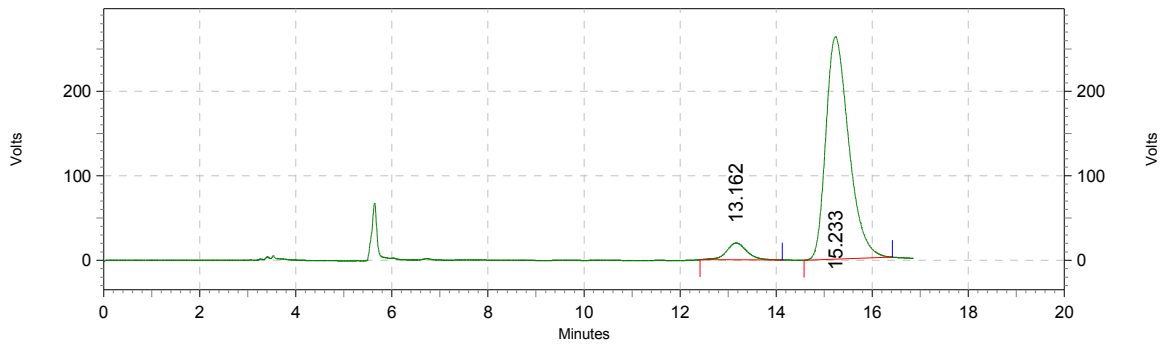

| Peak# | t <sub>R</sub> (min) | Area    | Area (%) |
|-------|----------------------|---------|----------|
| 1     | 13.162               | 589300  | 6.321    |
| 2     | 15.233               | 8734299 | 93.679   |

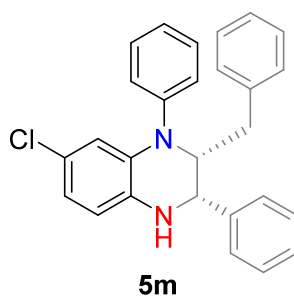

**(2R,3S)-2-benzyl-7-chloro-1,3-diphenyl-1,2,3,4-tetrahydroquinoxaline**

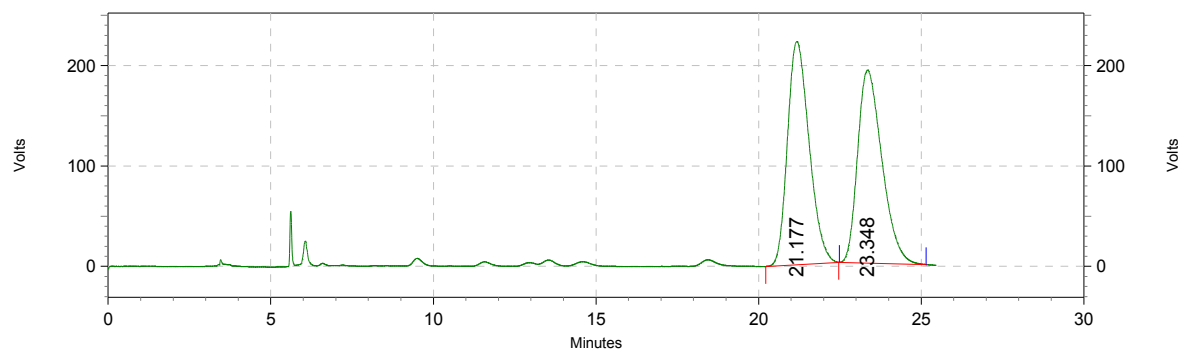

| Peak# | t <sub>R</sub> (min) | Area     | Area (%) |
|-------|----------------------|----------|----------|
| 1     | 21.177               | 10278456 | 50.701   |
| 2     | 23.348               | 9994242  | 49.299   |

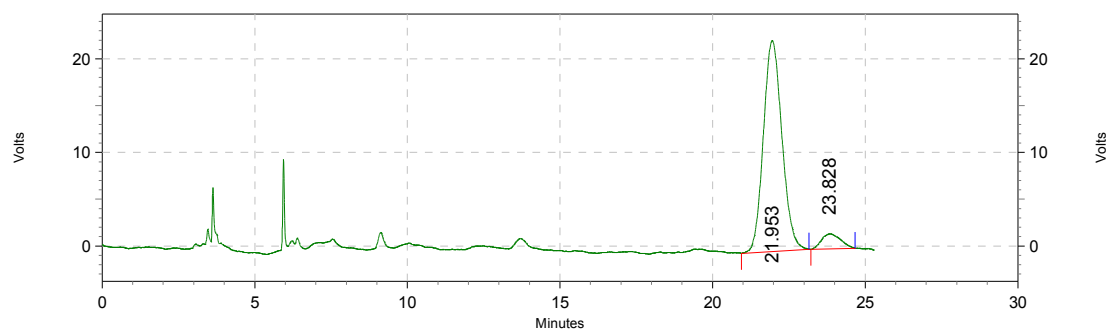

| Peak# | t <sub>R</sub> (min) | Area   | Area (%) |
|-------|----------------------|--------|----------|
| 1     | 21.953               | 953328 | 93.111   |
| 2     | 23.828               | 70534  | 6.889    |

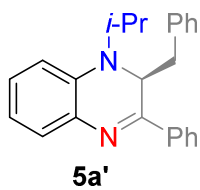

**(S)-2-benzyl-1-isopropyl-3-phenyl-1,2-dihydroquinoxaline**

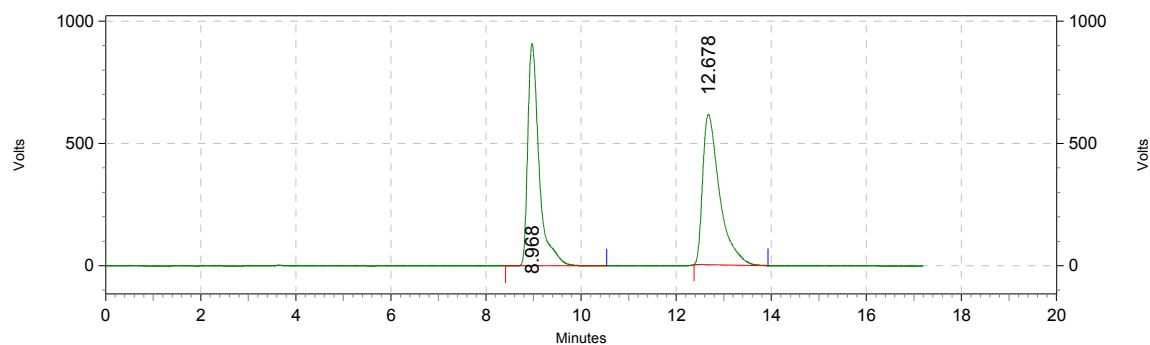

| Peak# | t <sub>R</sub> (min) | Area     | Area (%) |
|-------|----------------------|----------|----------|
| 1     | 8.968                | 15008150 | 49.869   |
| 2     | 12.678               | 15086908 | 50.131   |

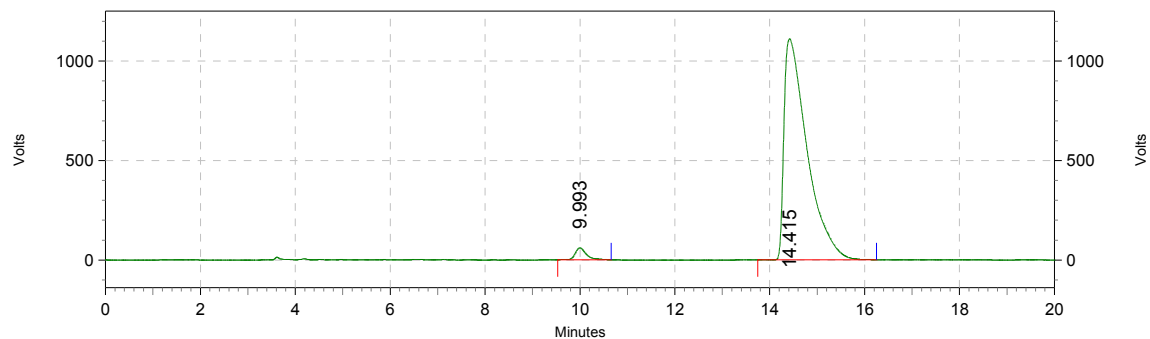

| Peak# | t <sub>R</sub> (min) | Area     | Area (%) |
|-------|----------------------|----------|----------|
| 1     | 9.993                | 987397   | 2.569    |
| 2     | 14.415               | 37441970 | 97.431   |

**NMR spectrum**

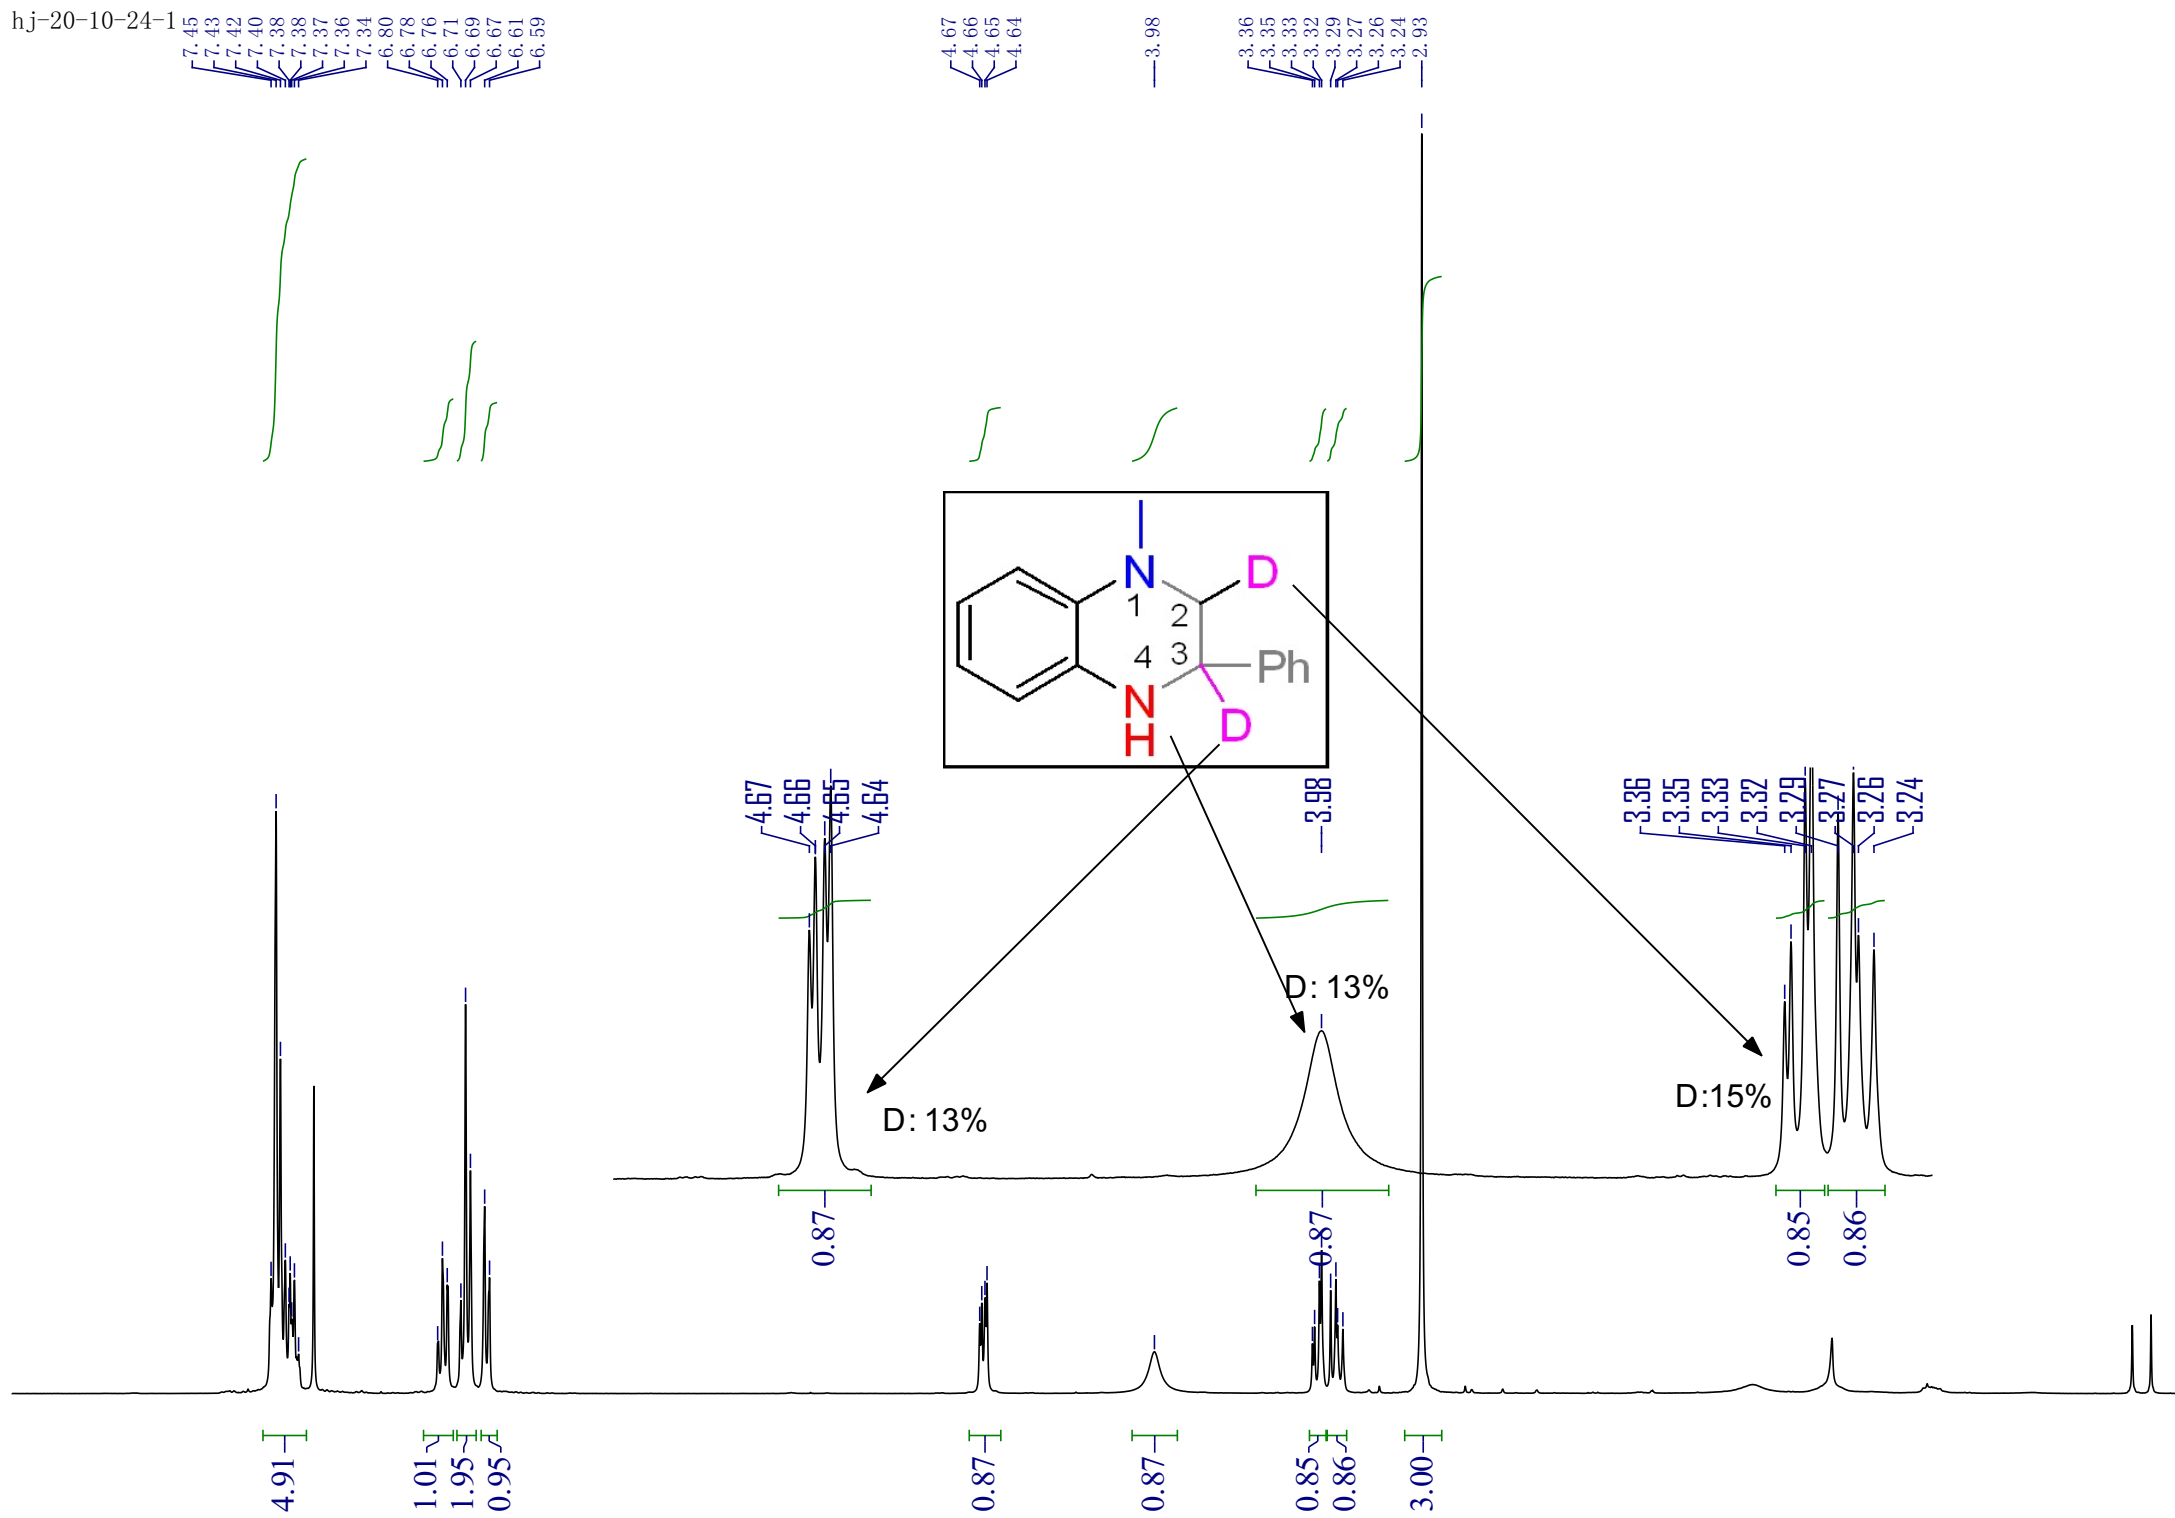

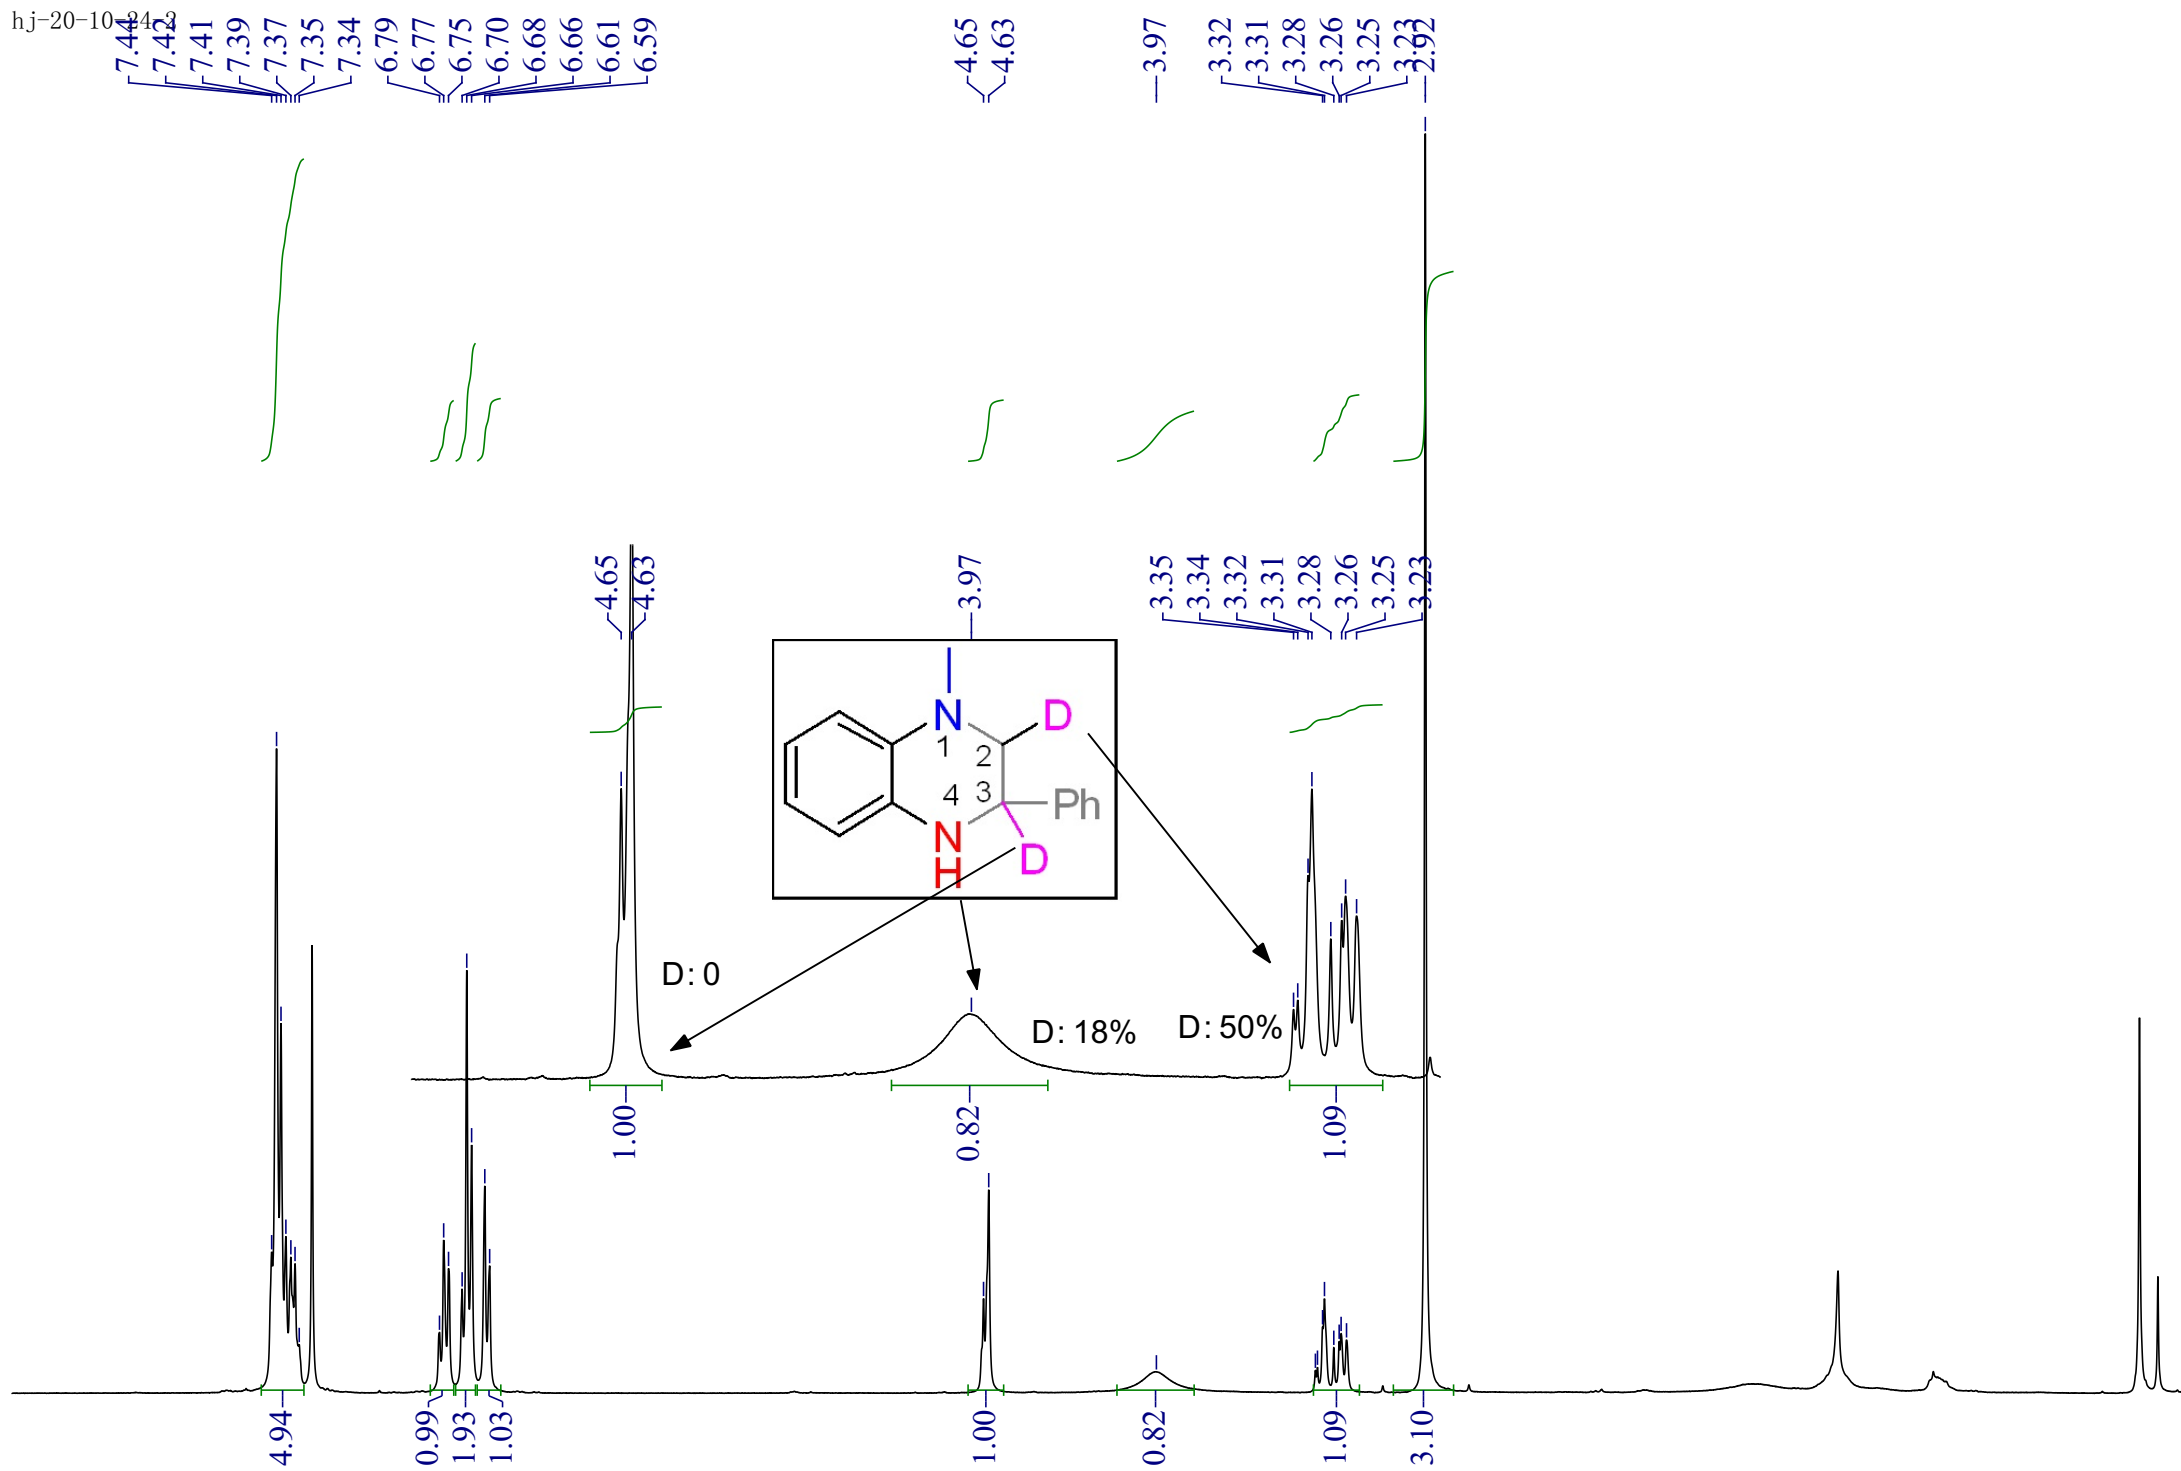

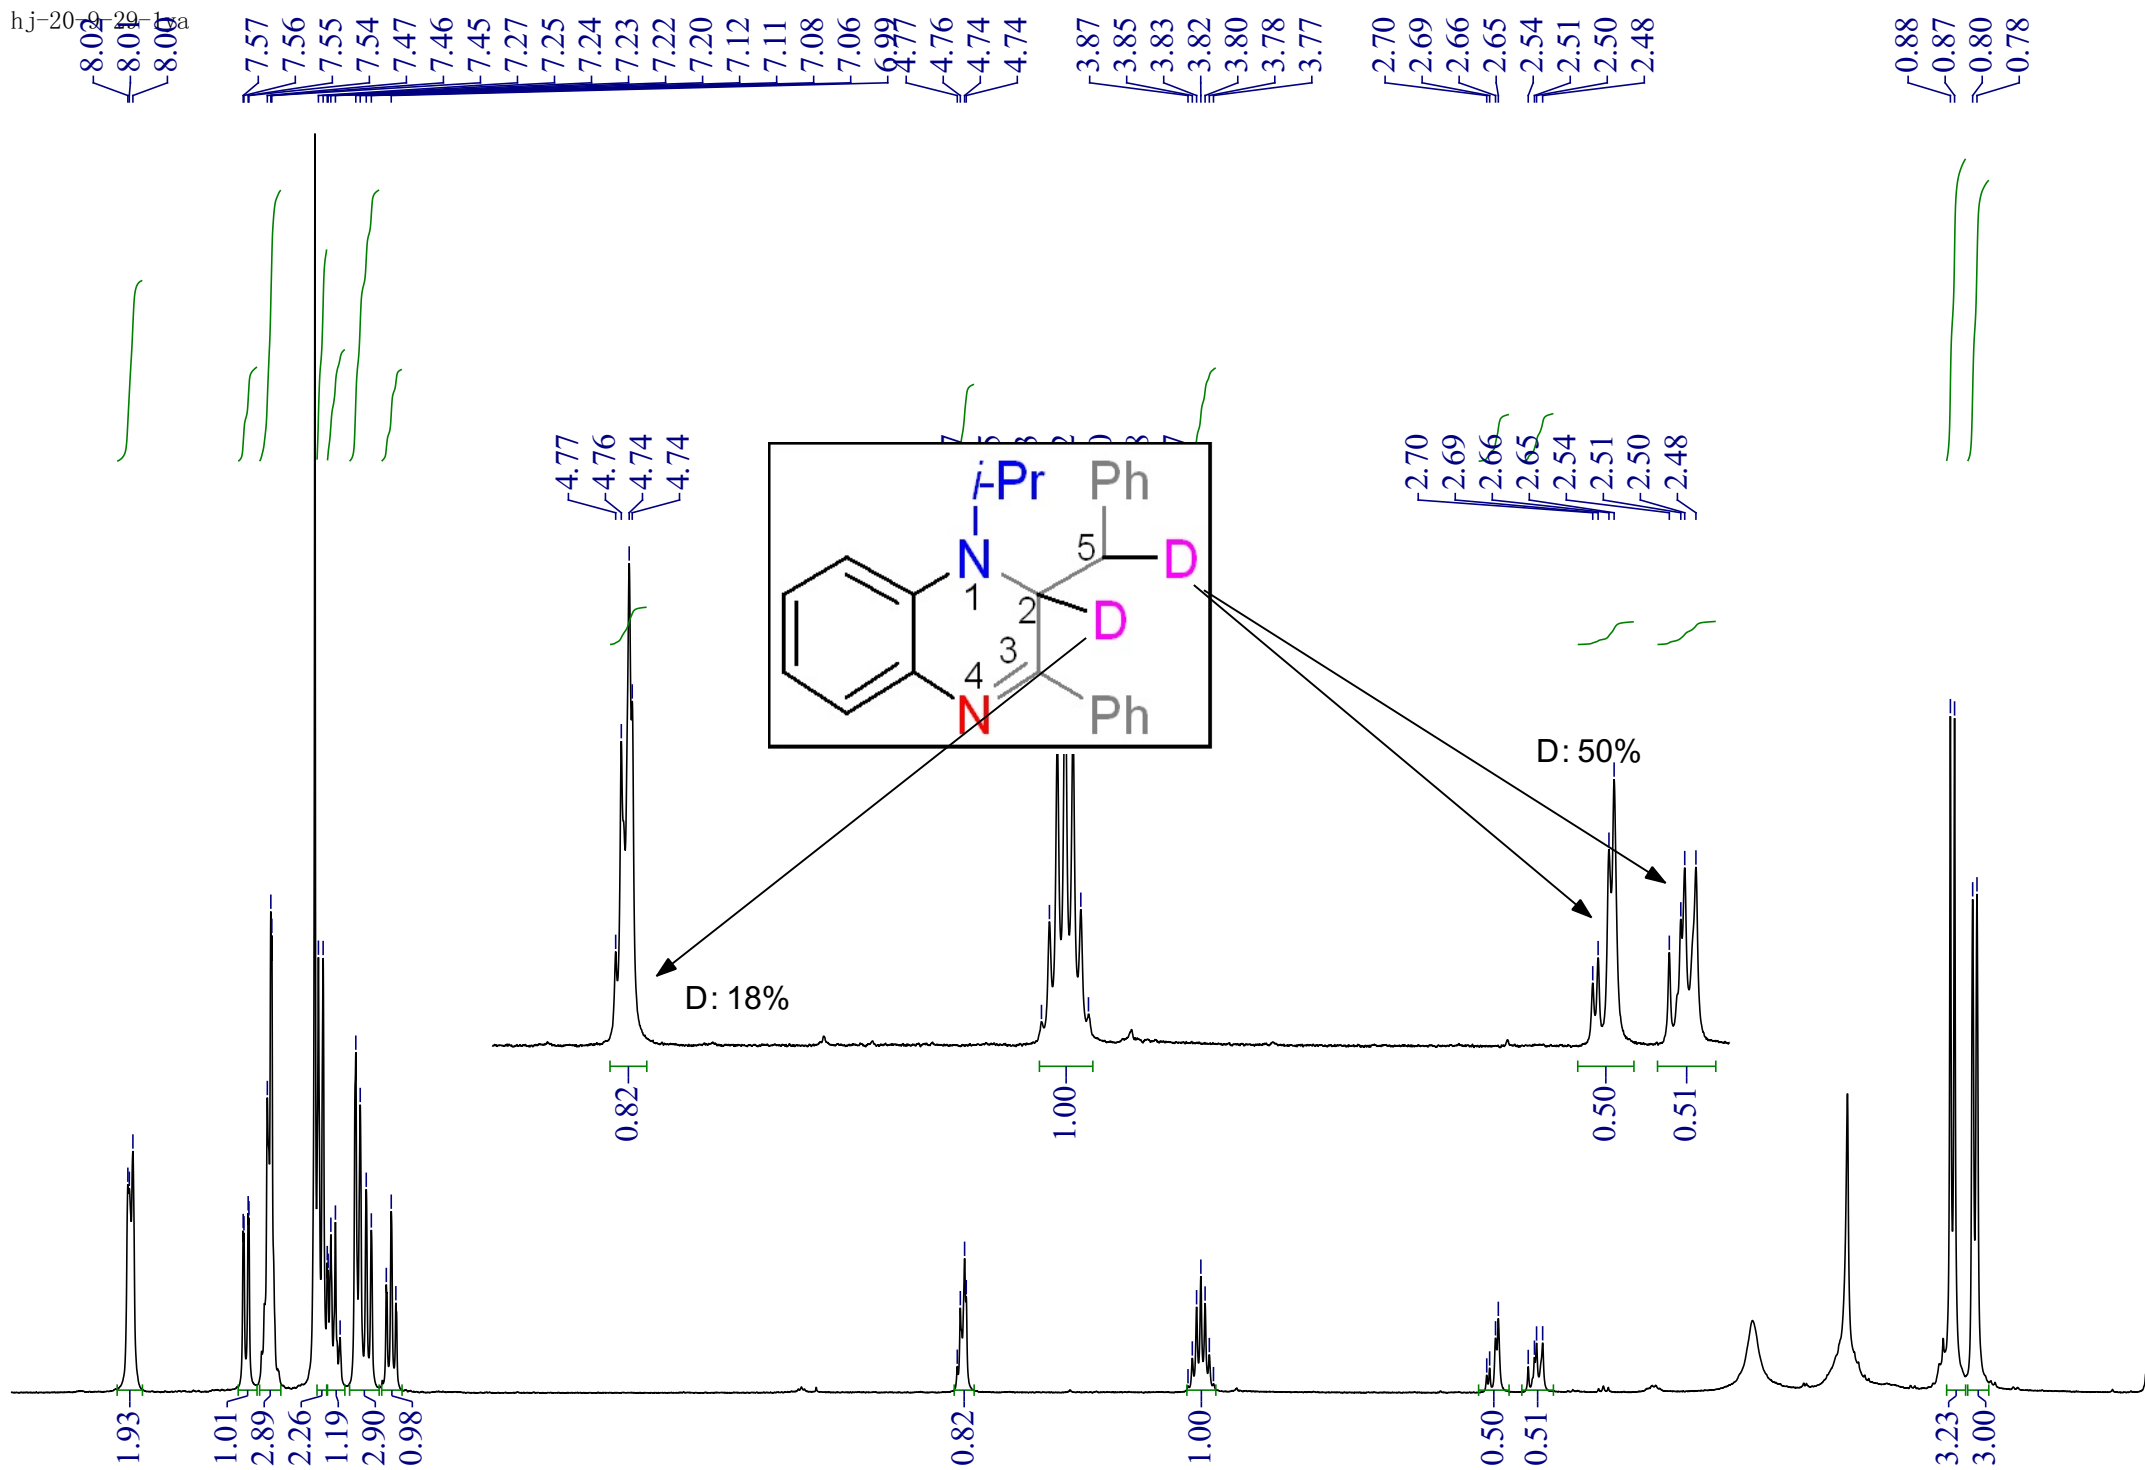



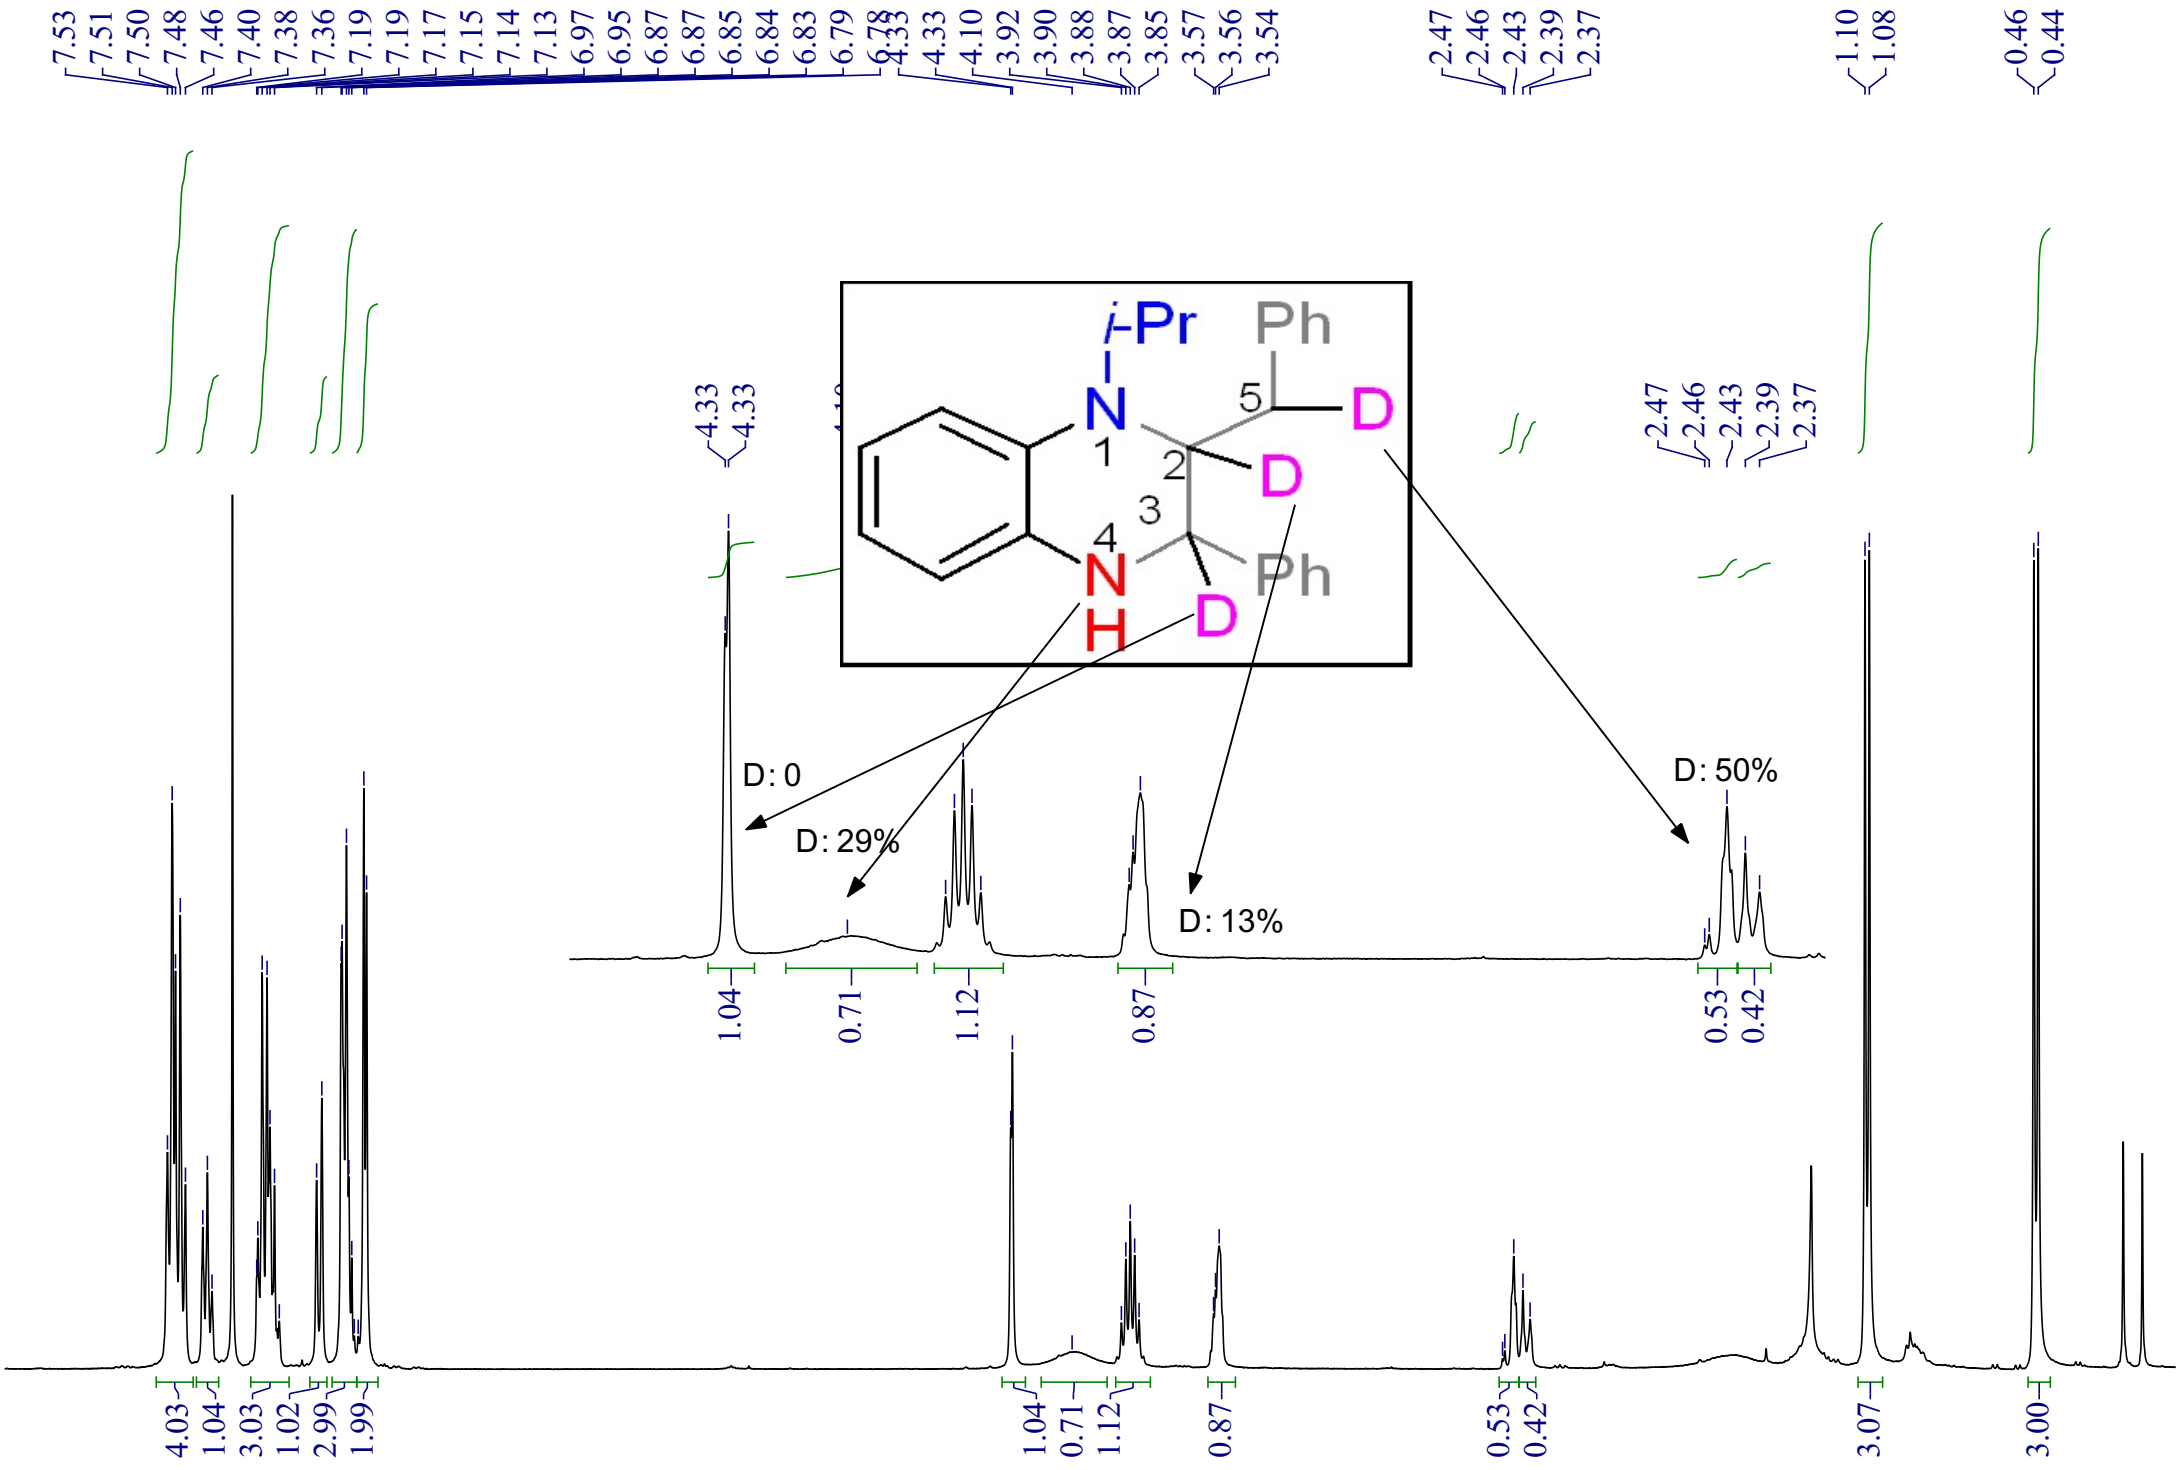

7.44  
7.42  
7.40  
7.38  
6.76  
6.74  
6.69  
6.67  
6.65  
6.60  
6.59

4.66  
4.65  
4.64  
4.63

3.98

3.35  
3.34  
3.32  
3.31  
3.27  
3.25  
2.91

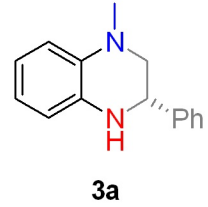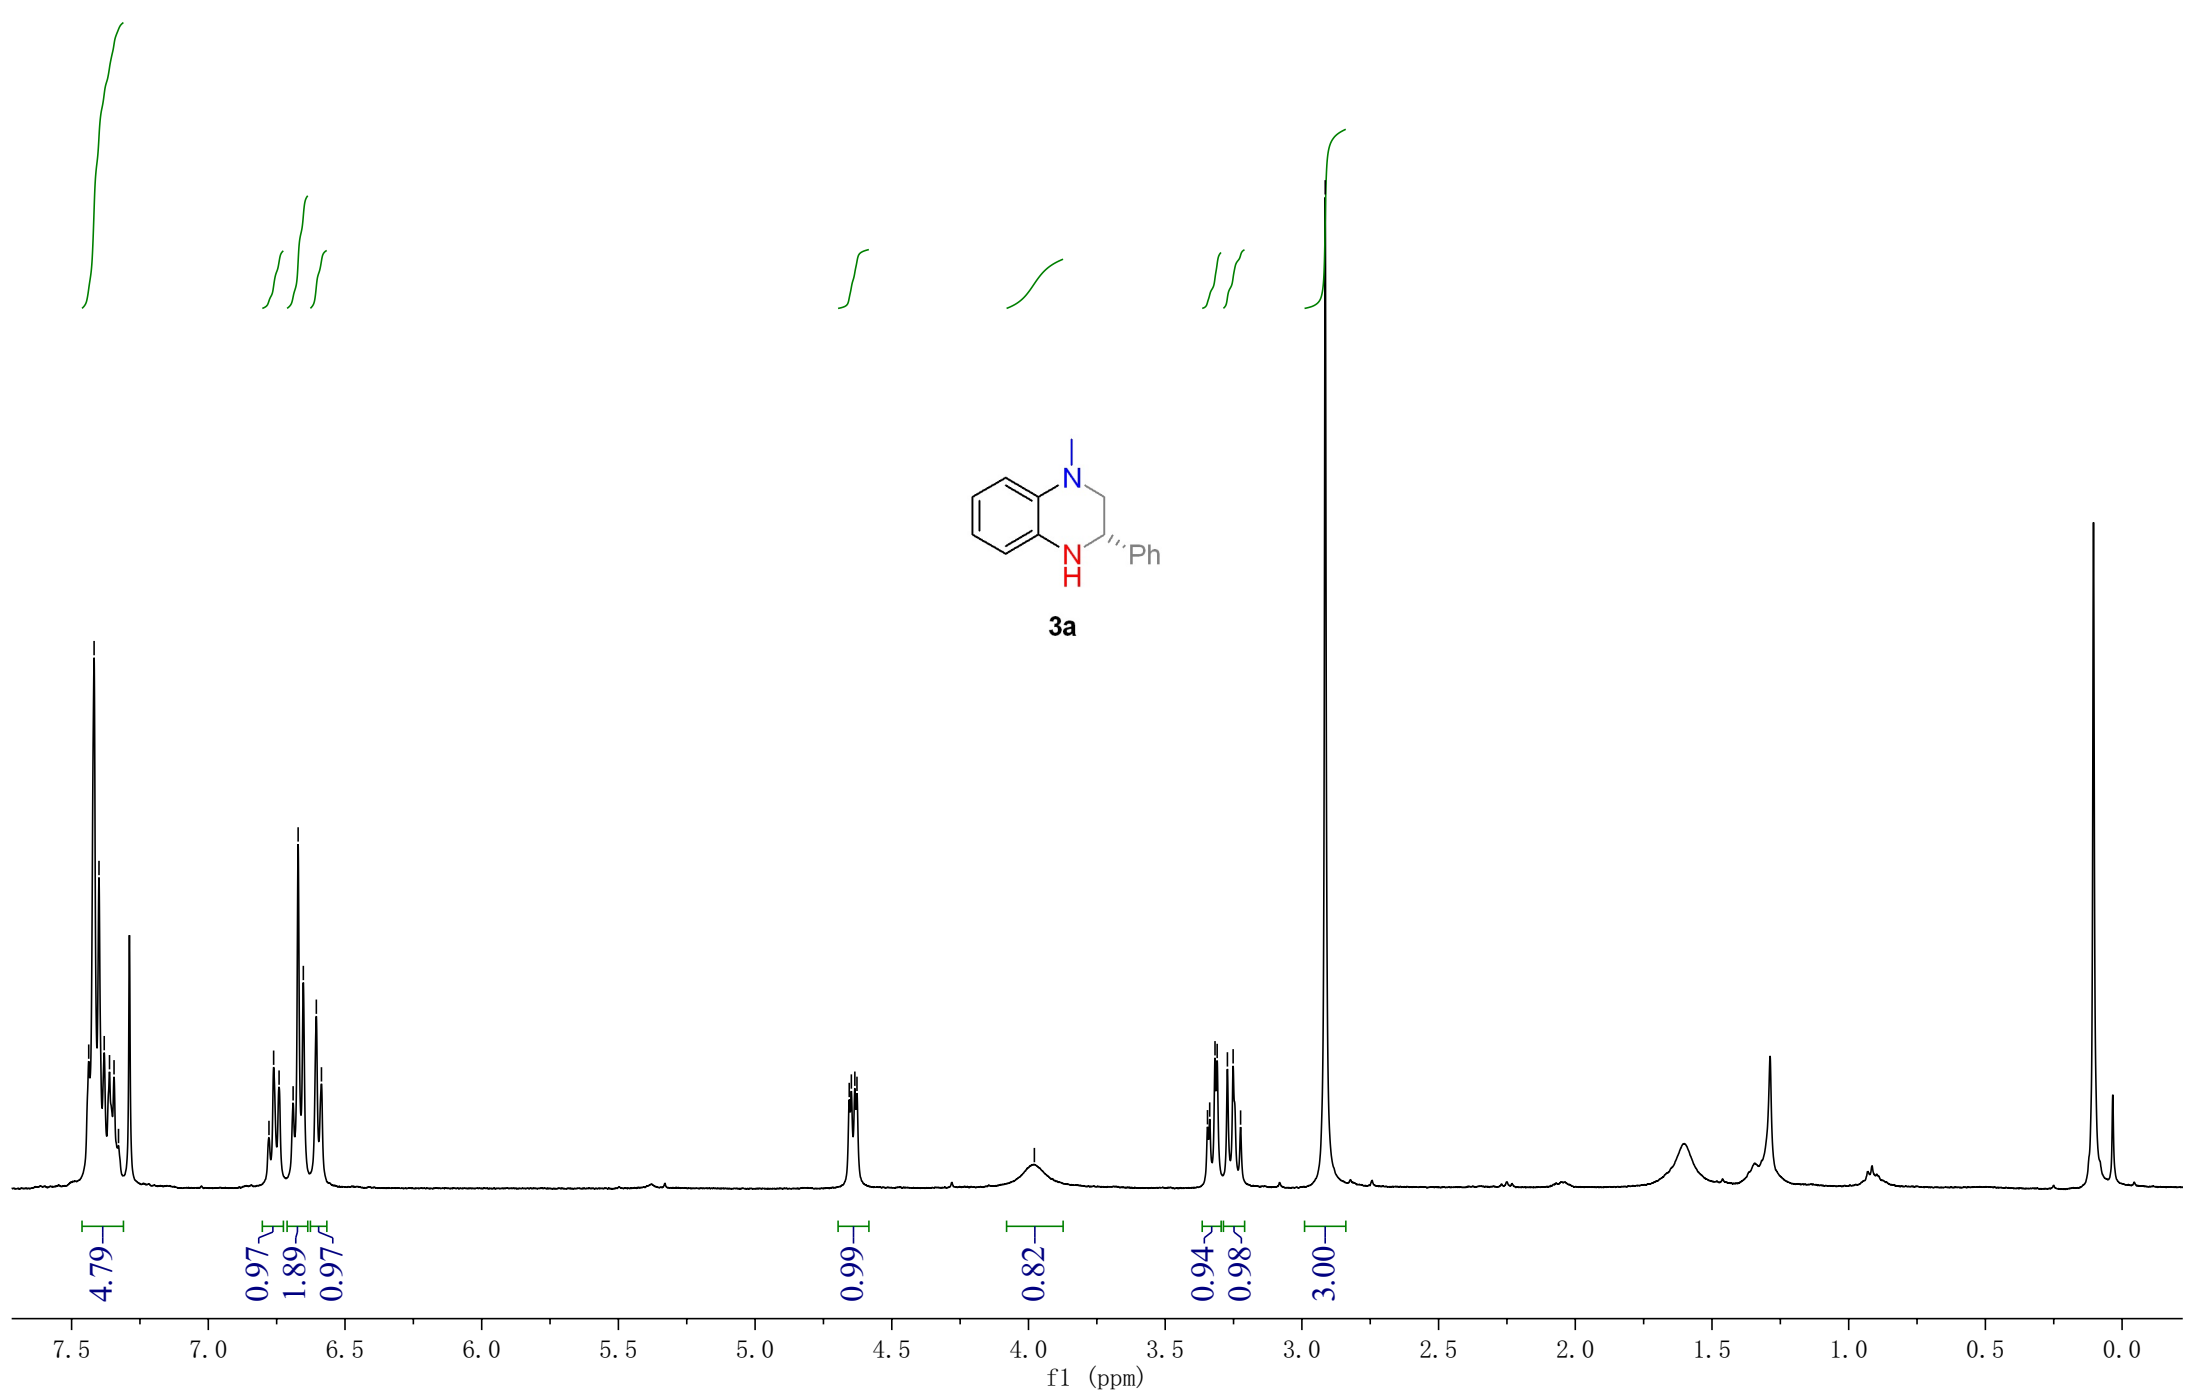

hj-36-3

—141.76

~135.48

~134.64

~128.65

~127.95

~127.02

~118.89

~118.32

~113.43

~111.76

—57.63

—54.70

—39.10

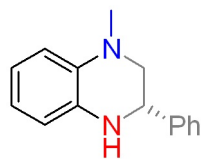

3a

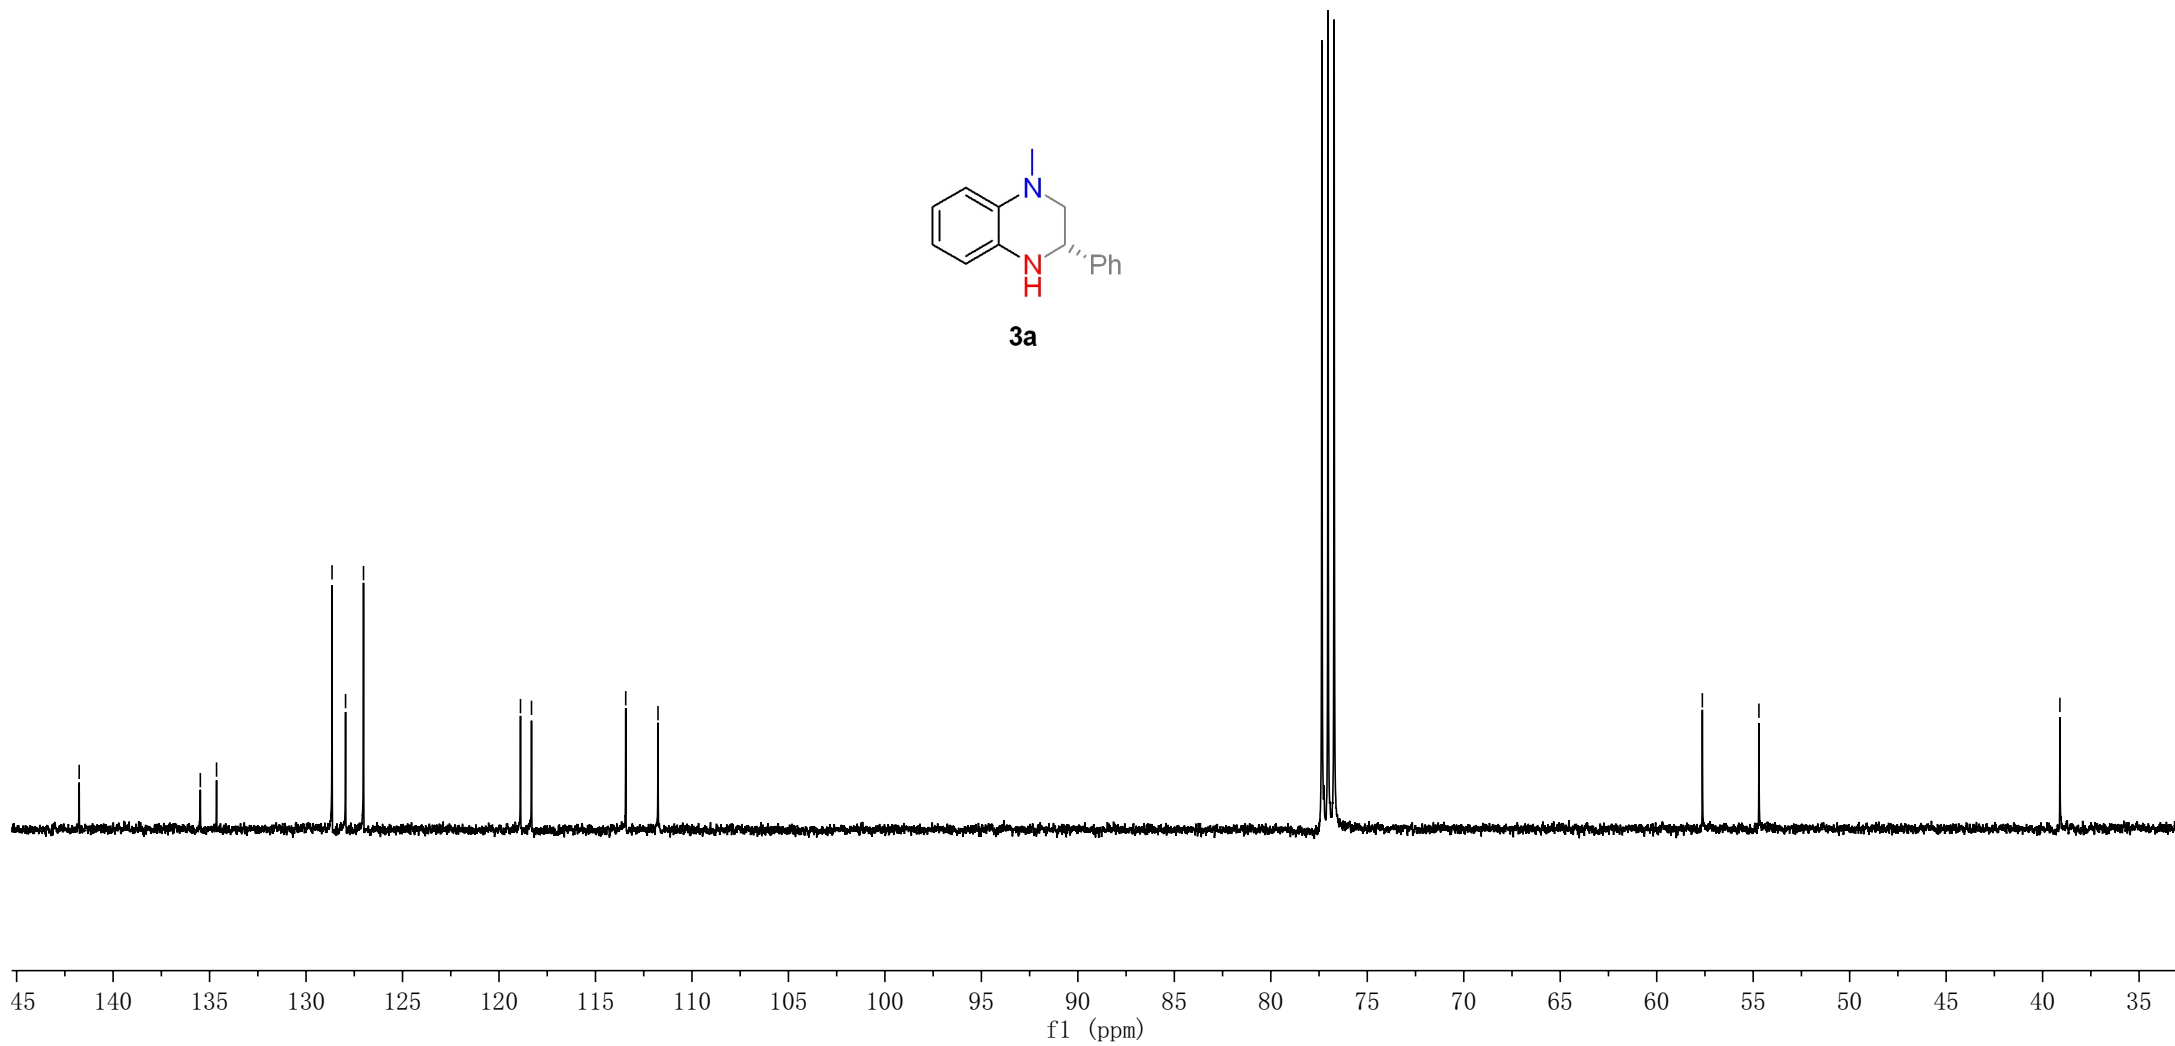

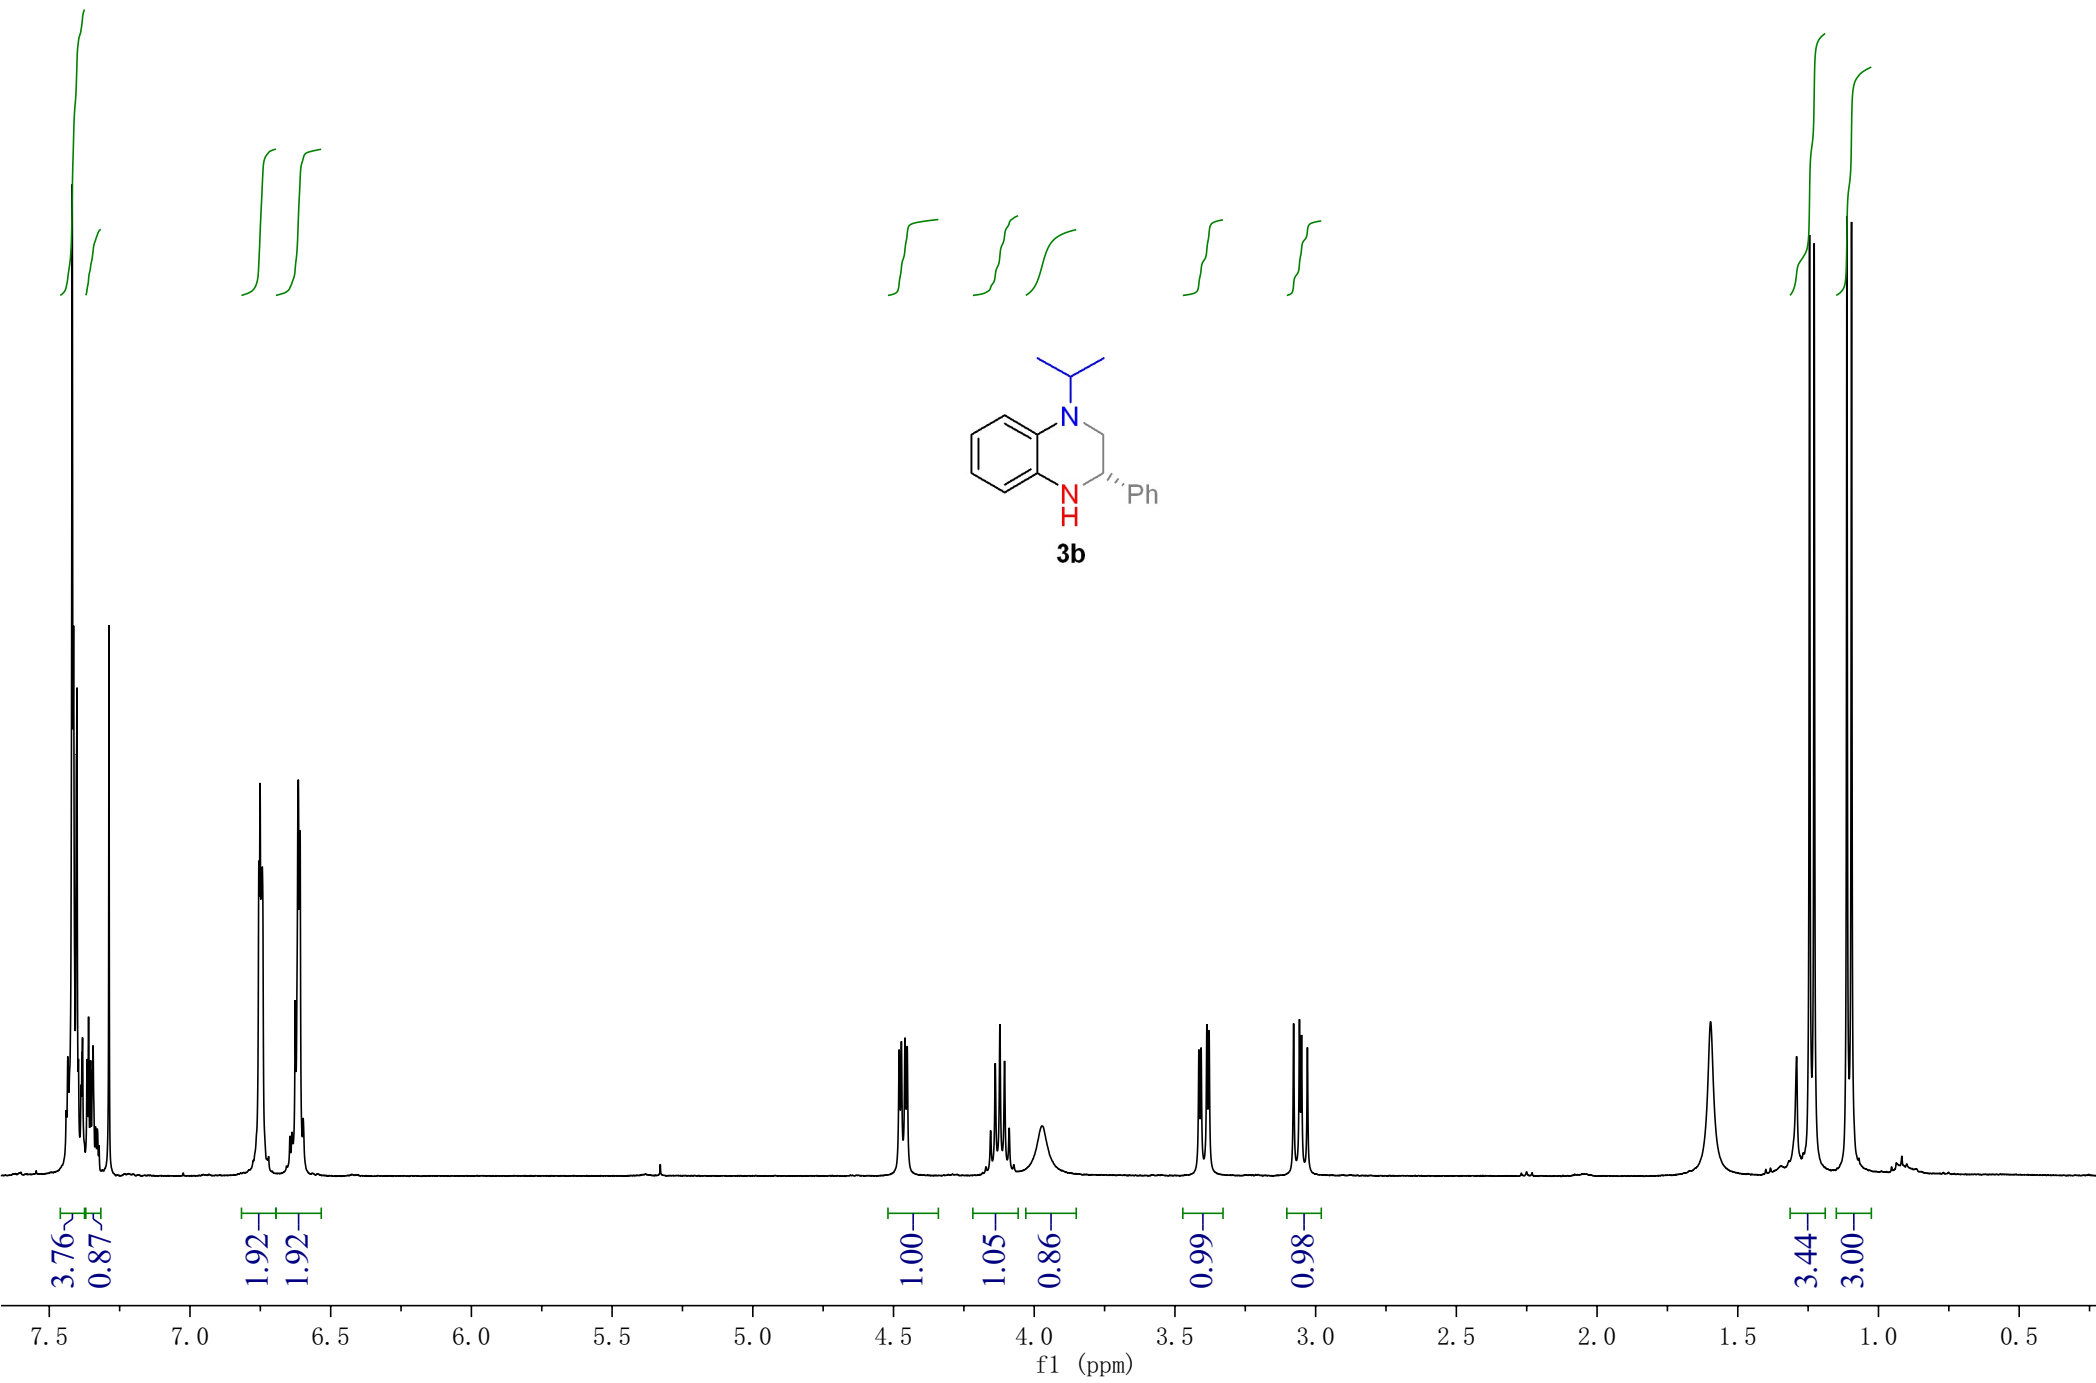

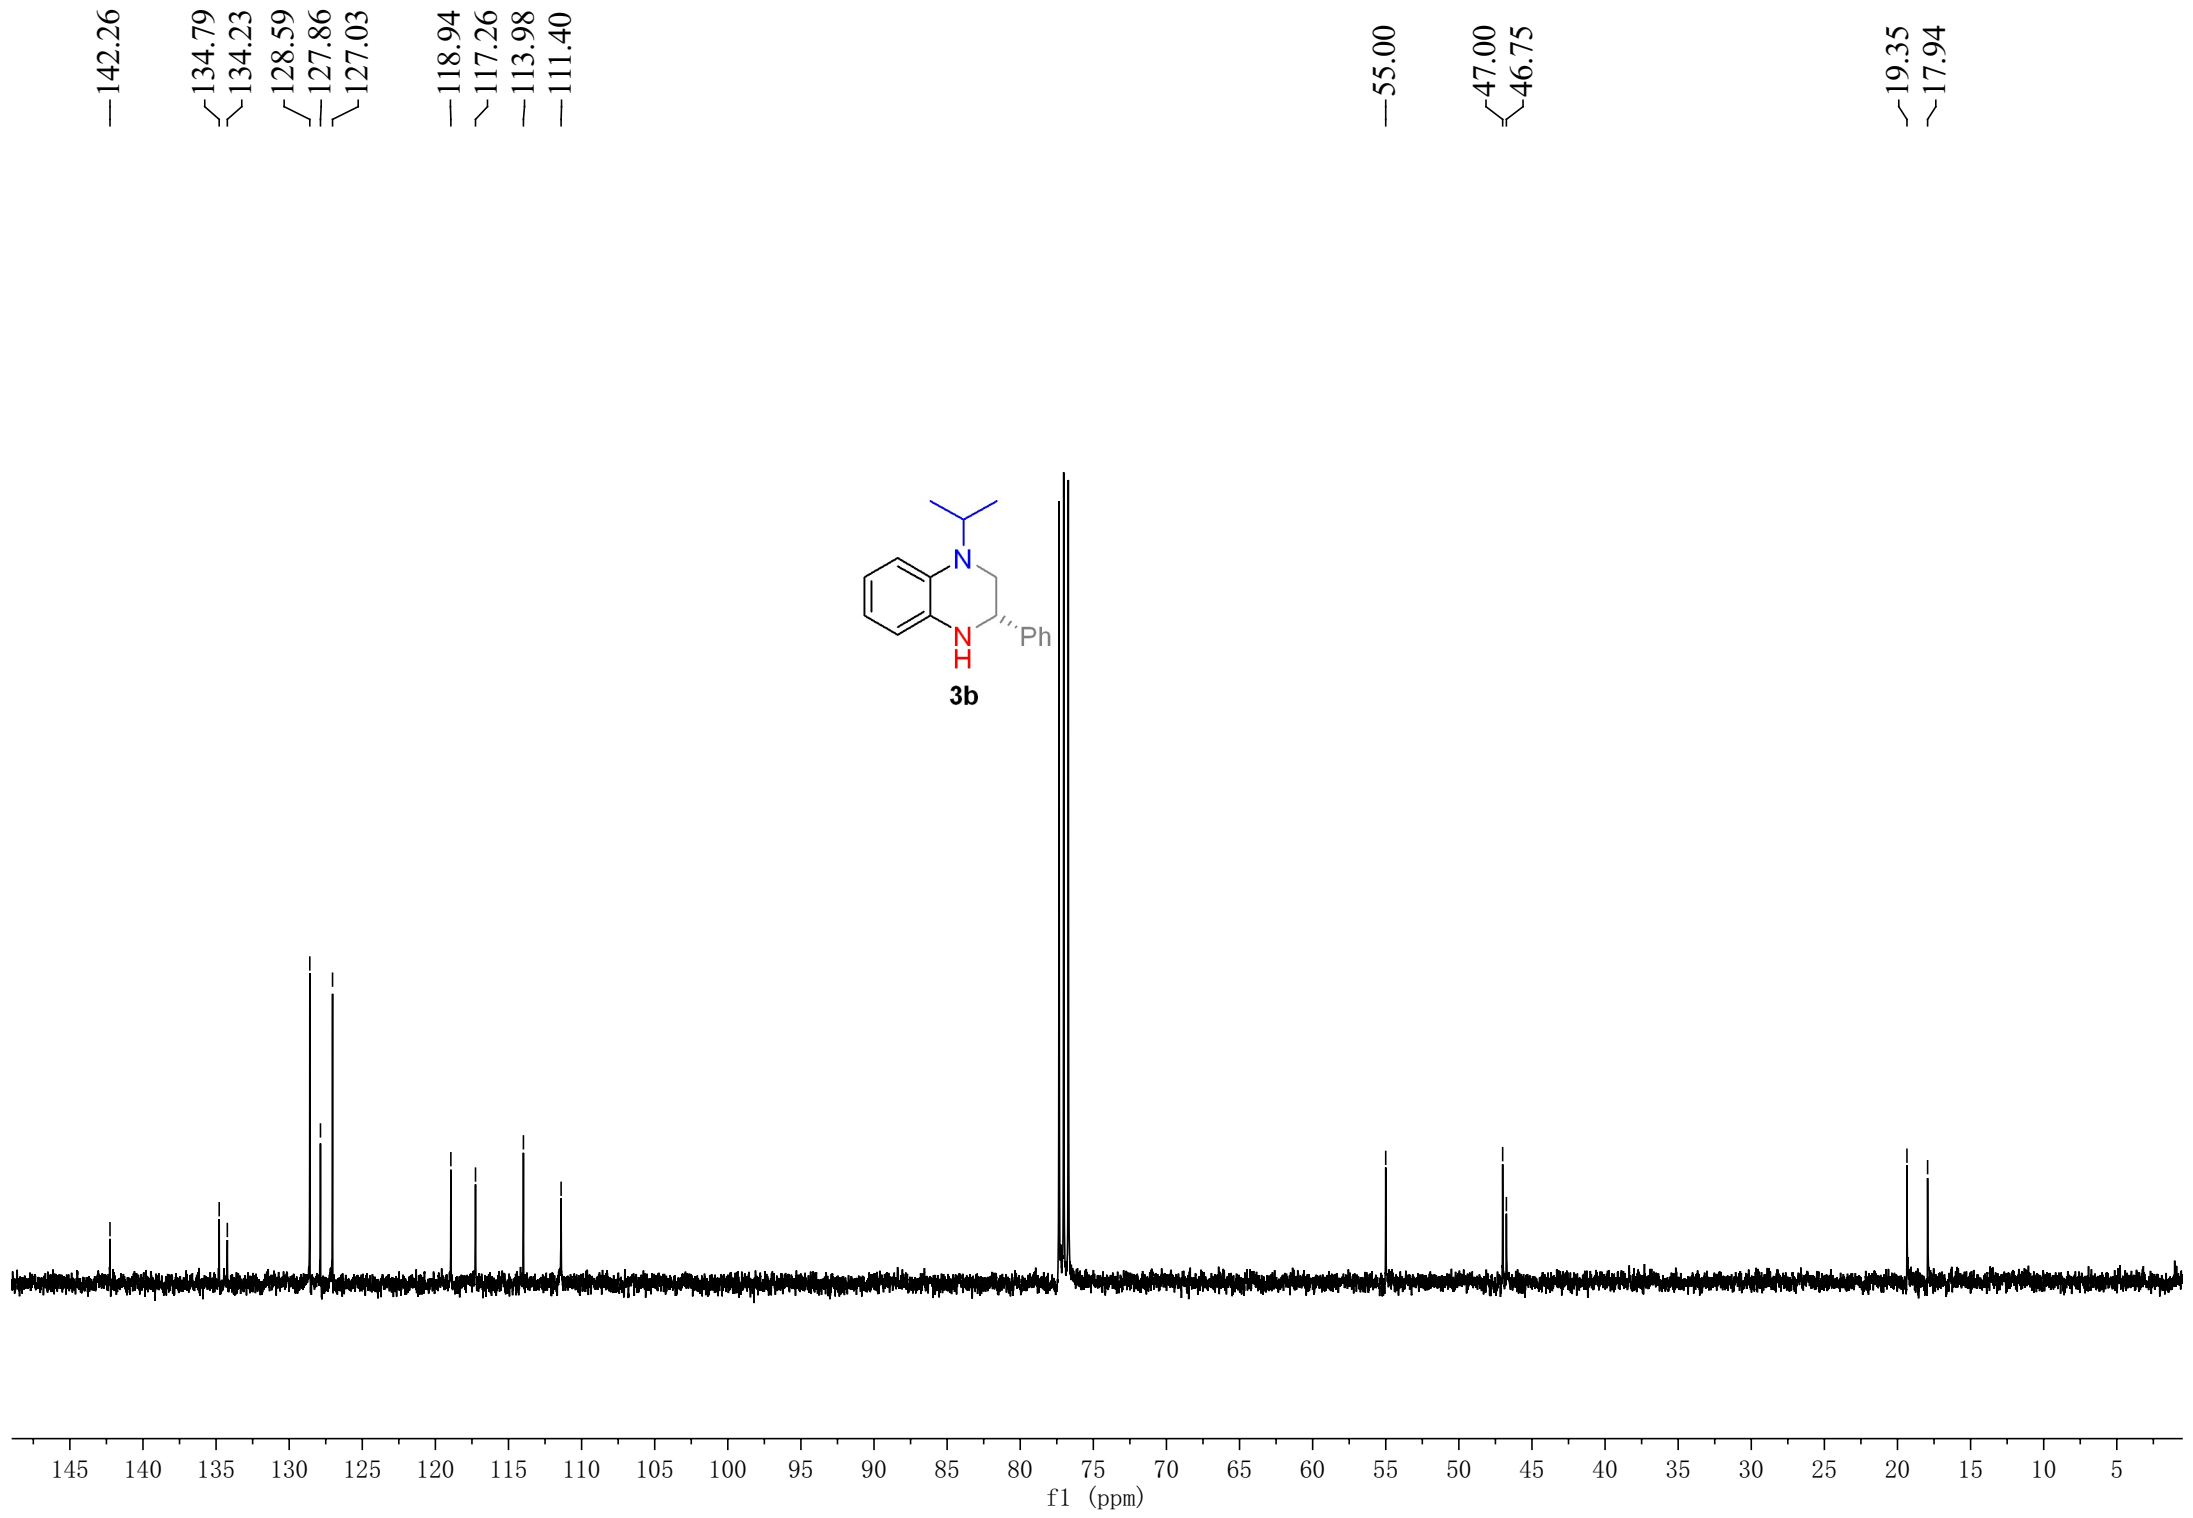

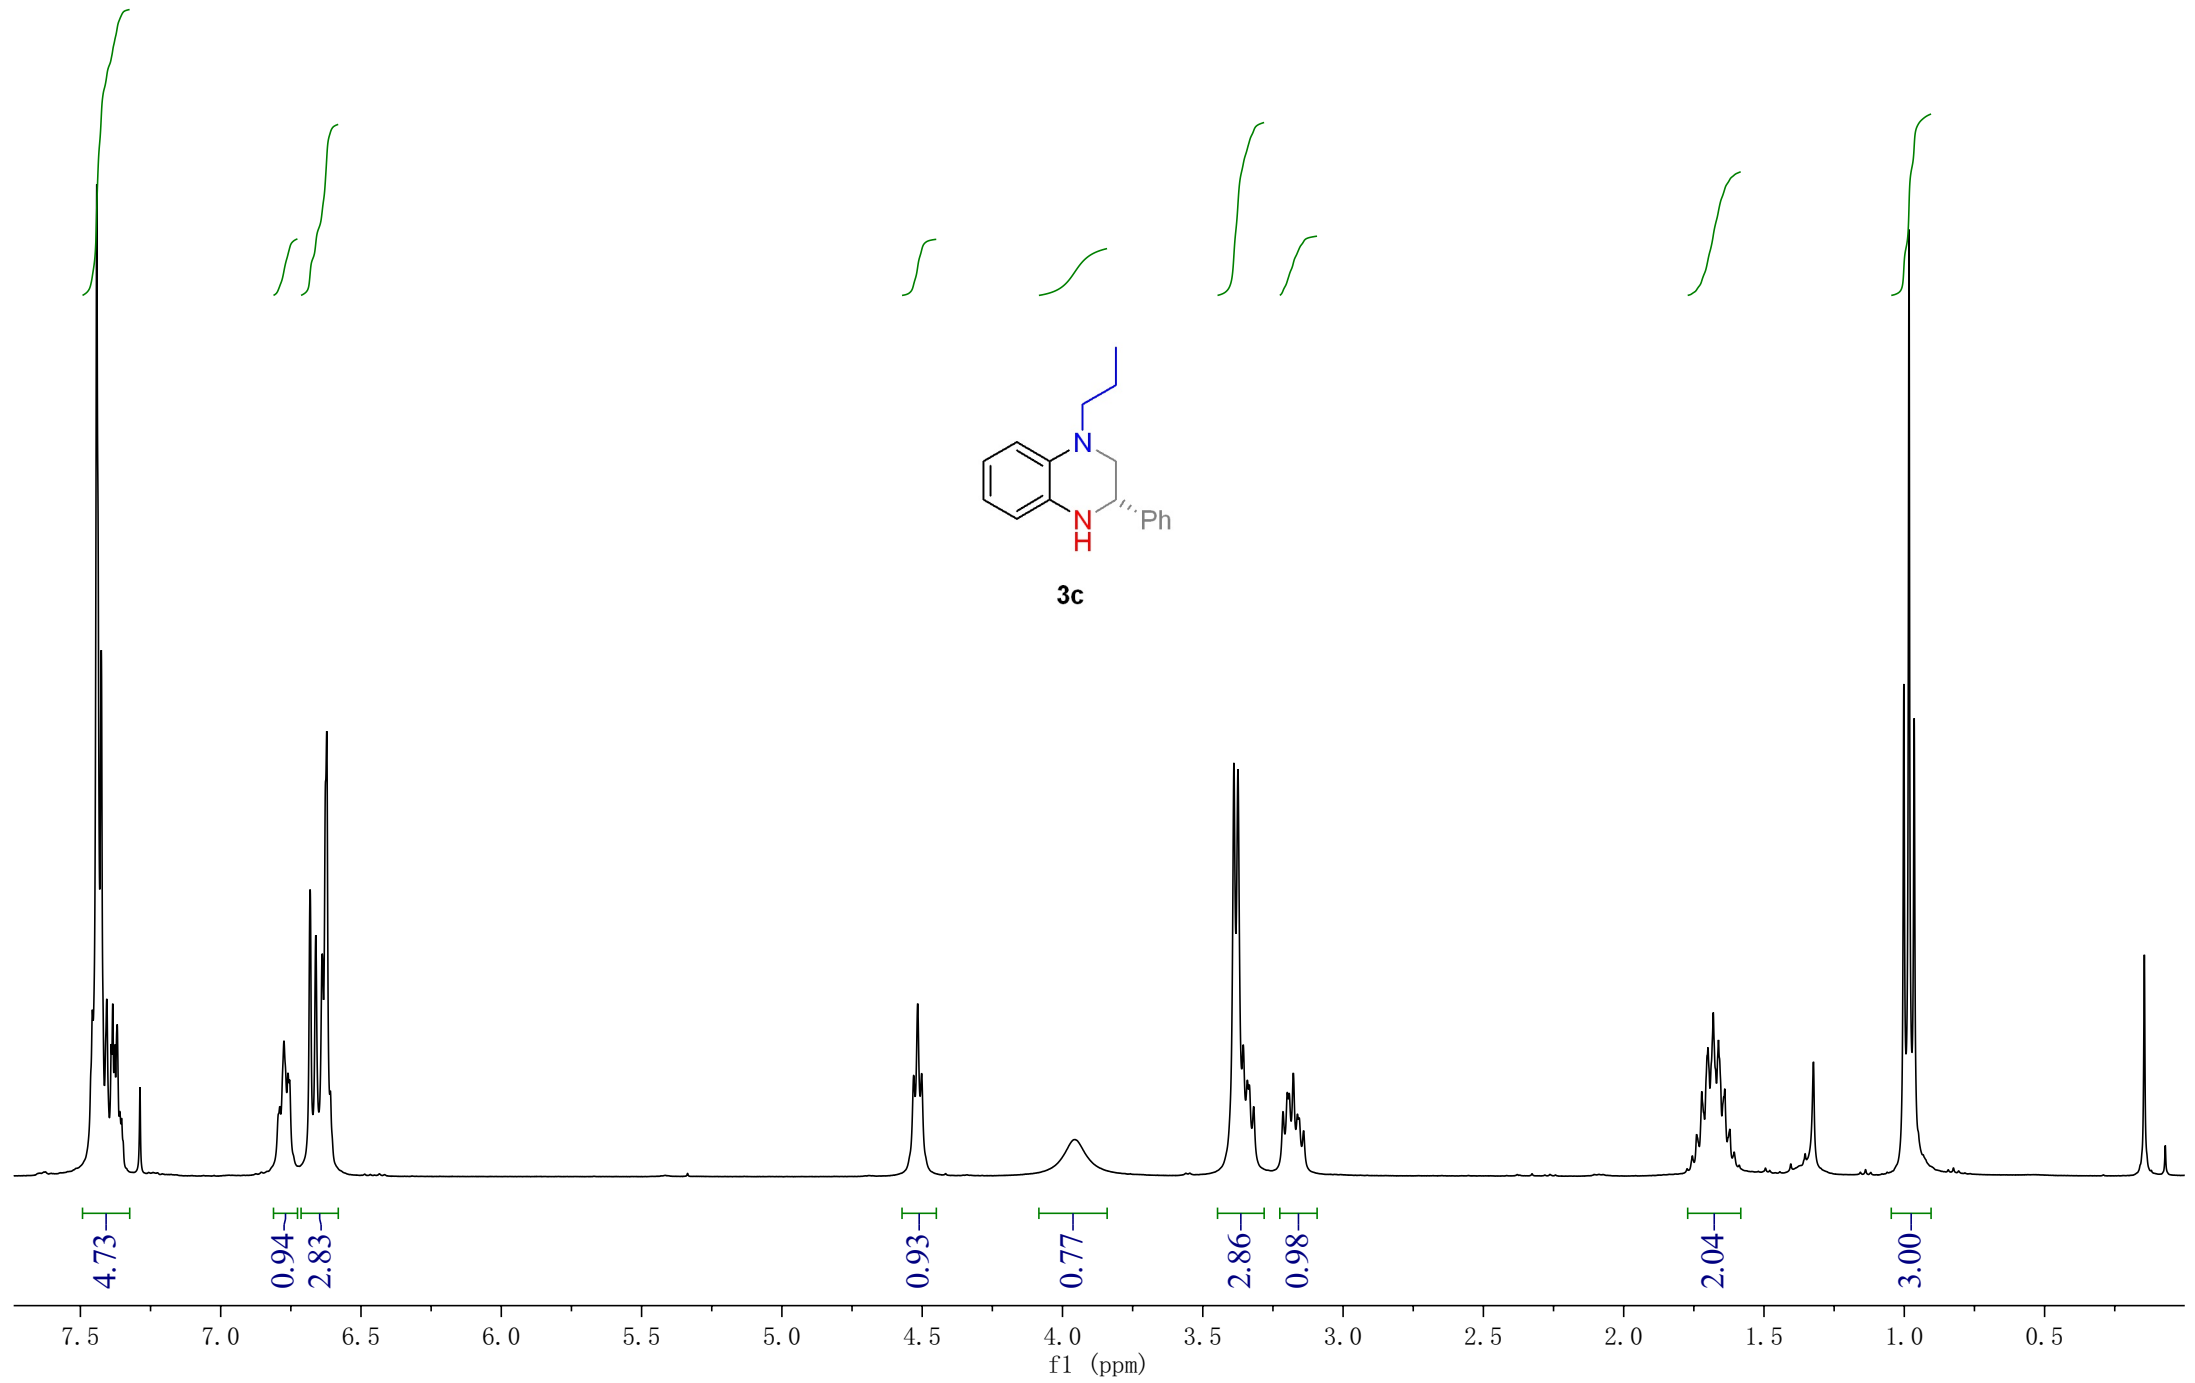

hj-86-5

—141.78  
—134.35  
—134.29  
—128.66  
—127.94  
—127.11  
  
—119.21  
—117.16  
—114.02  
—111.32

—55.86  
—54.19  
—53.36

—19.37

—11.66

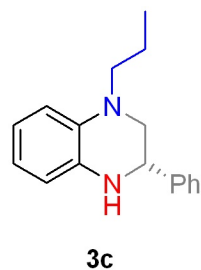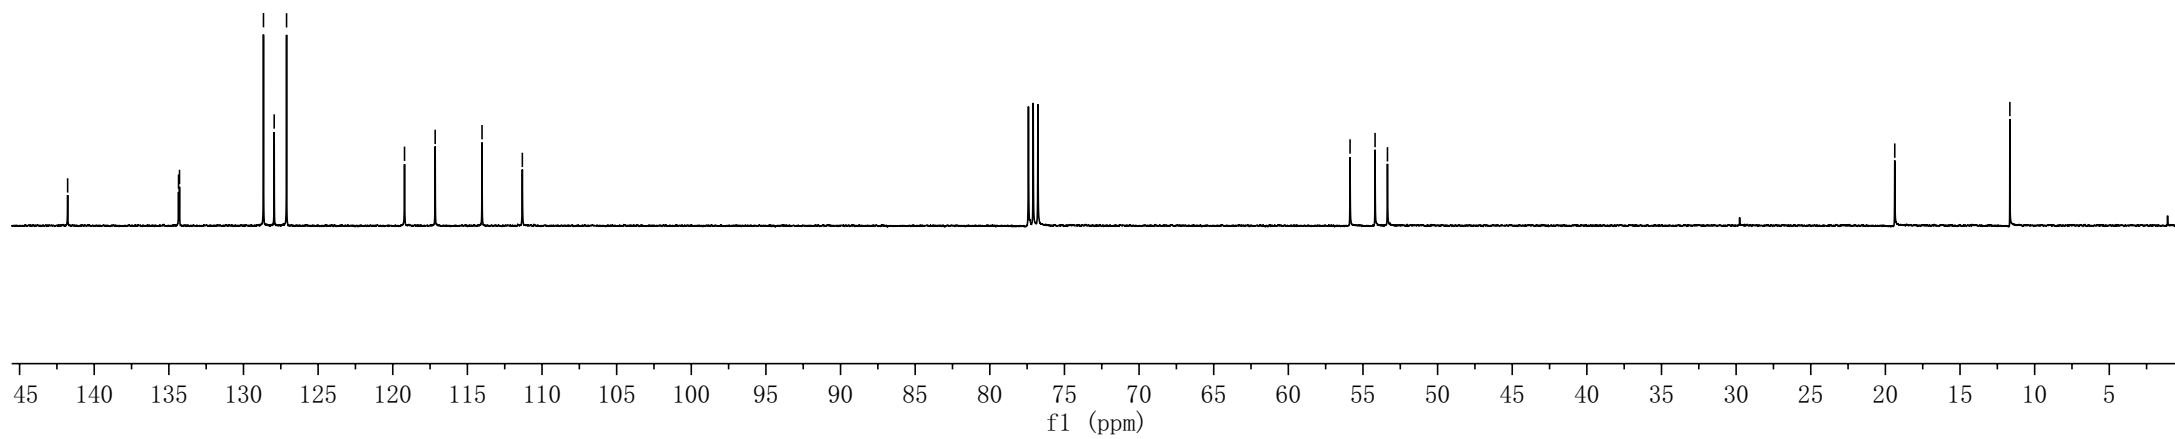

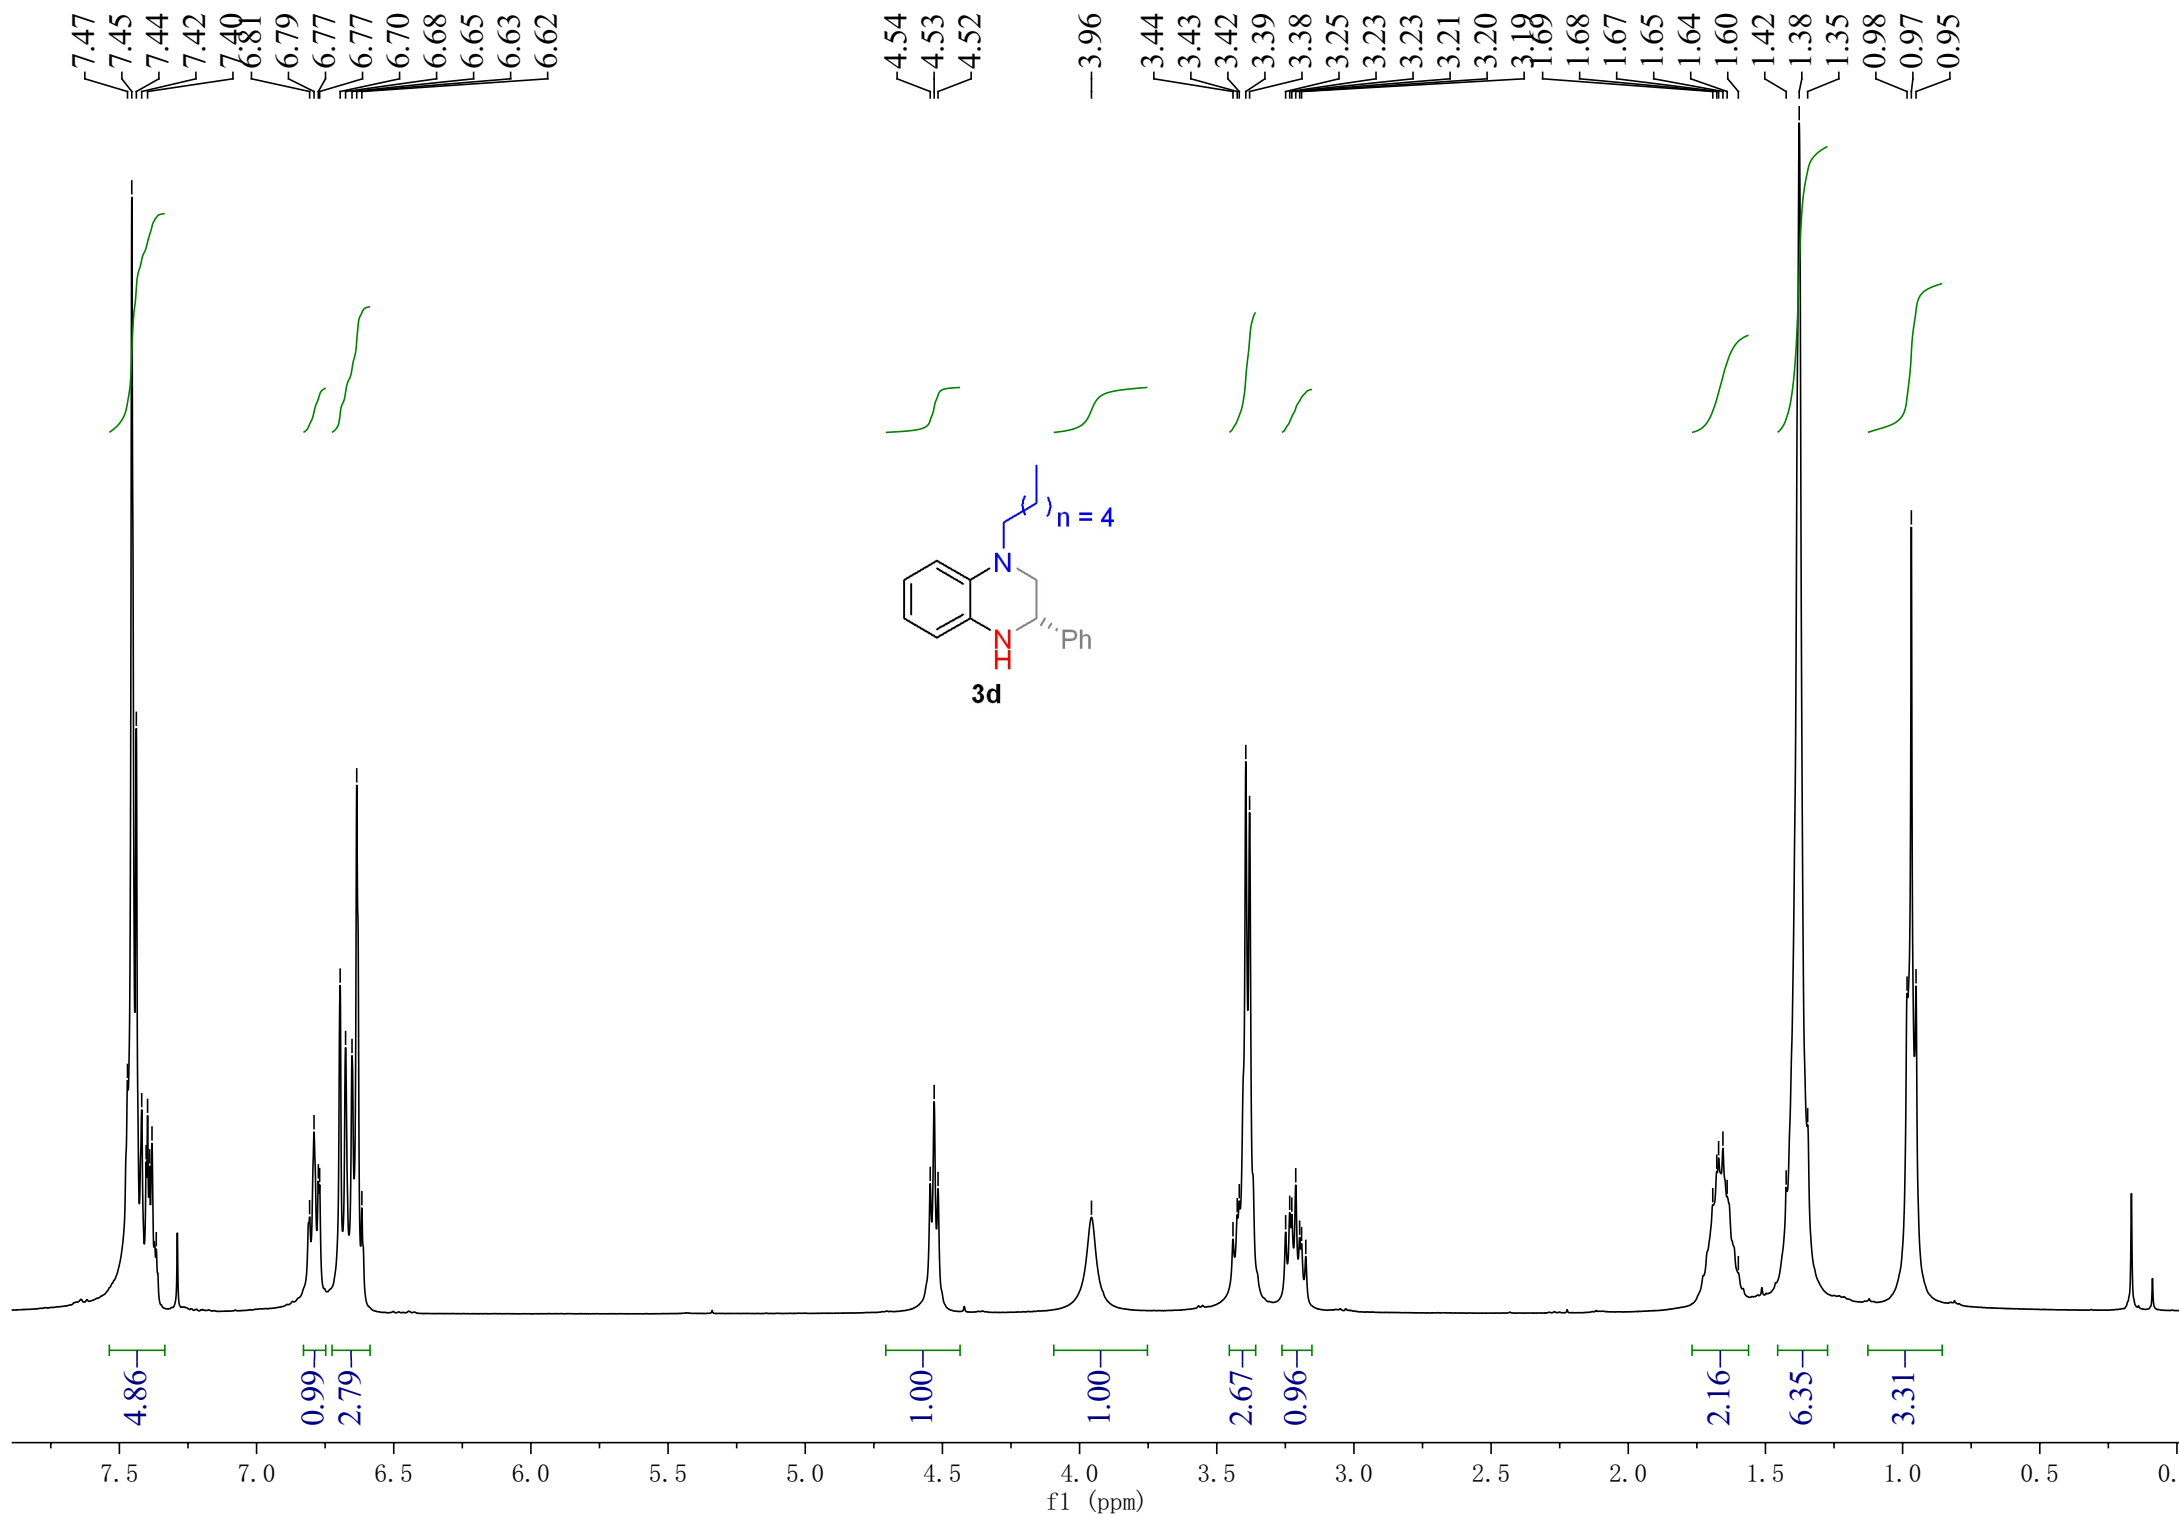



hj-20-9-24-2

141.82

134.33

128.65

127.93

127.11

119.21

117.15

114.00

111.30

55.77

54.23

51.56

31.78

26.99

26.01

22.71

14.12

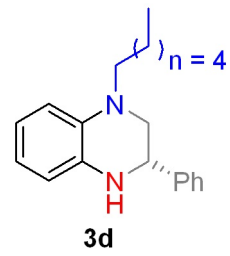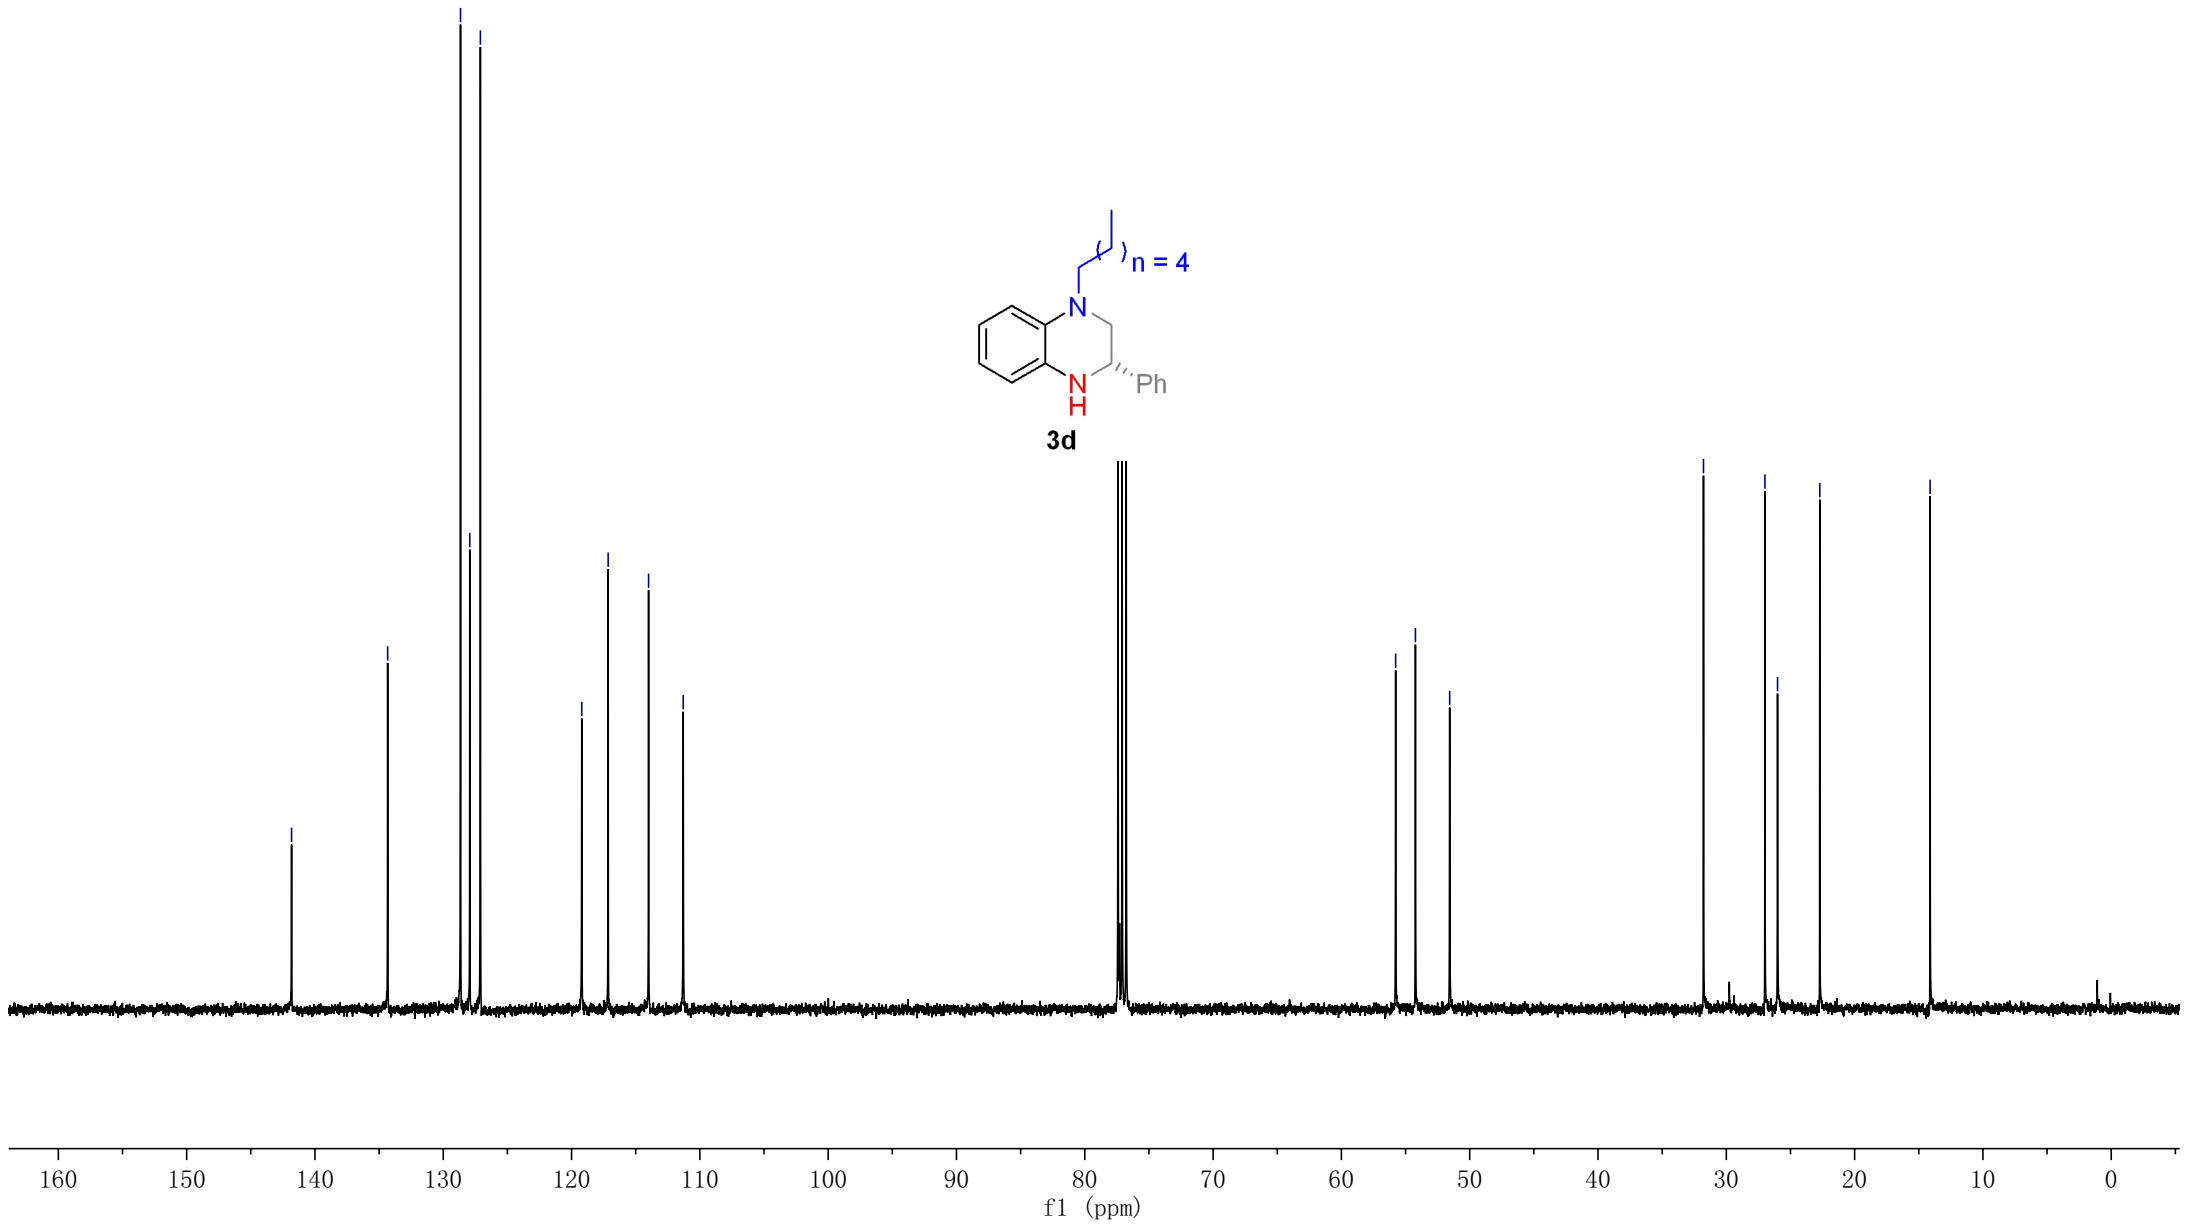

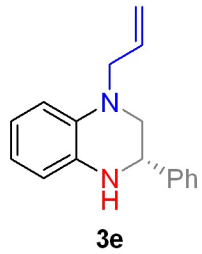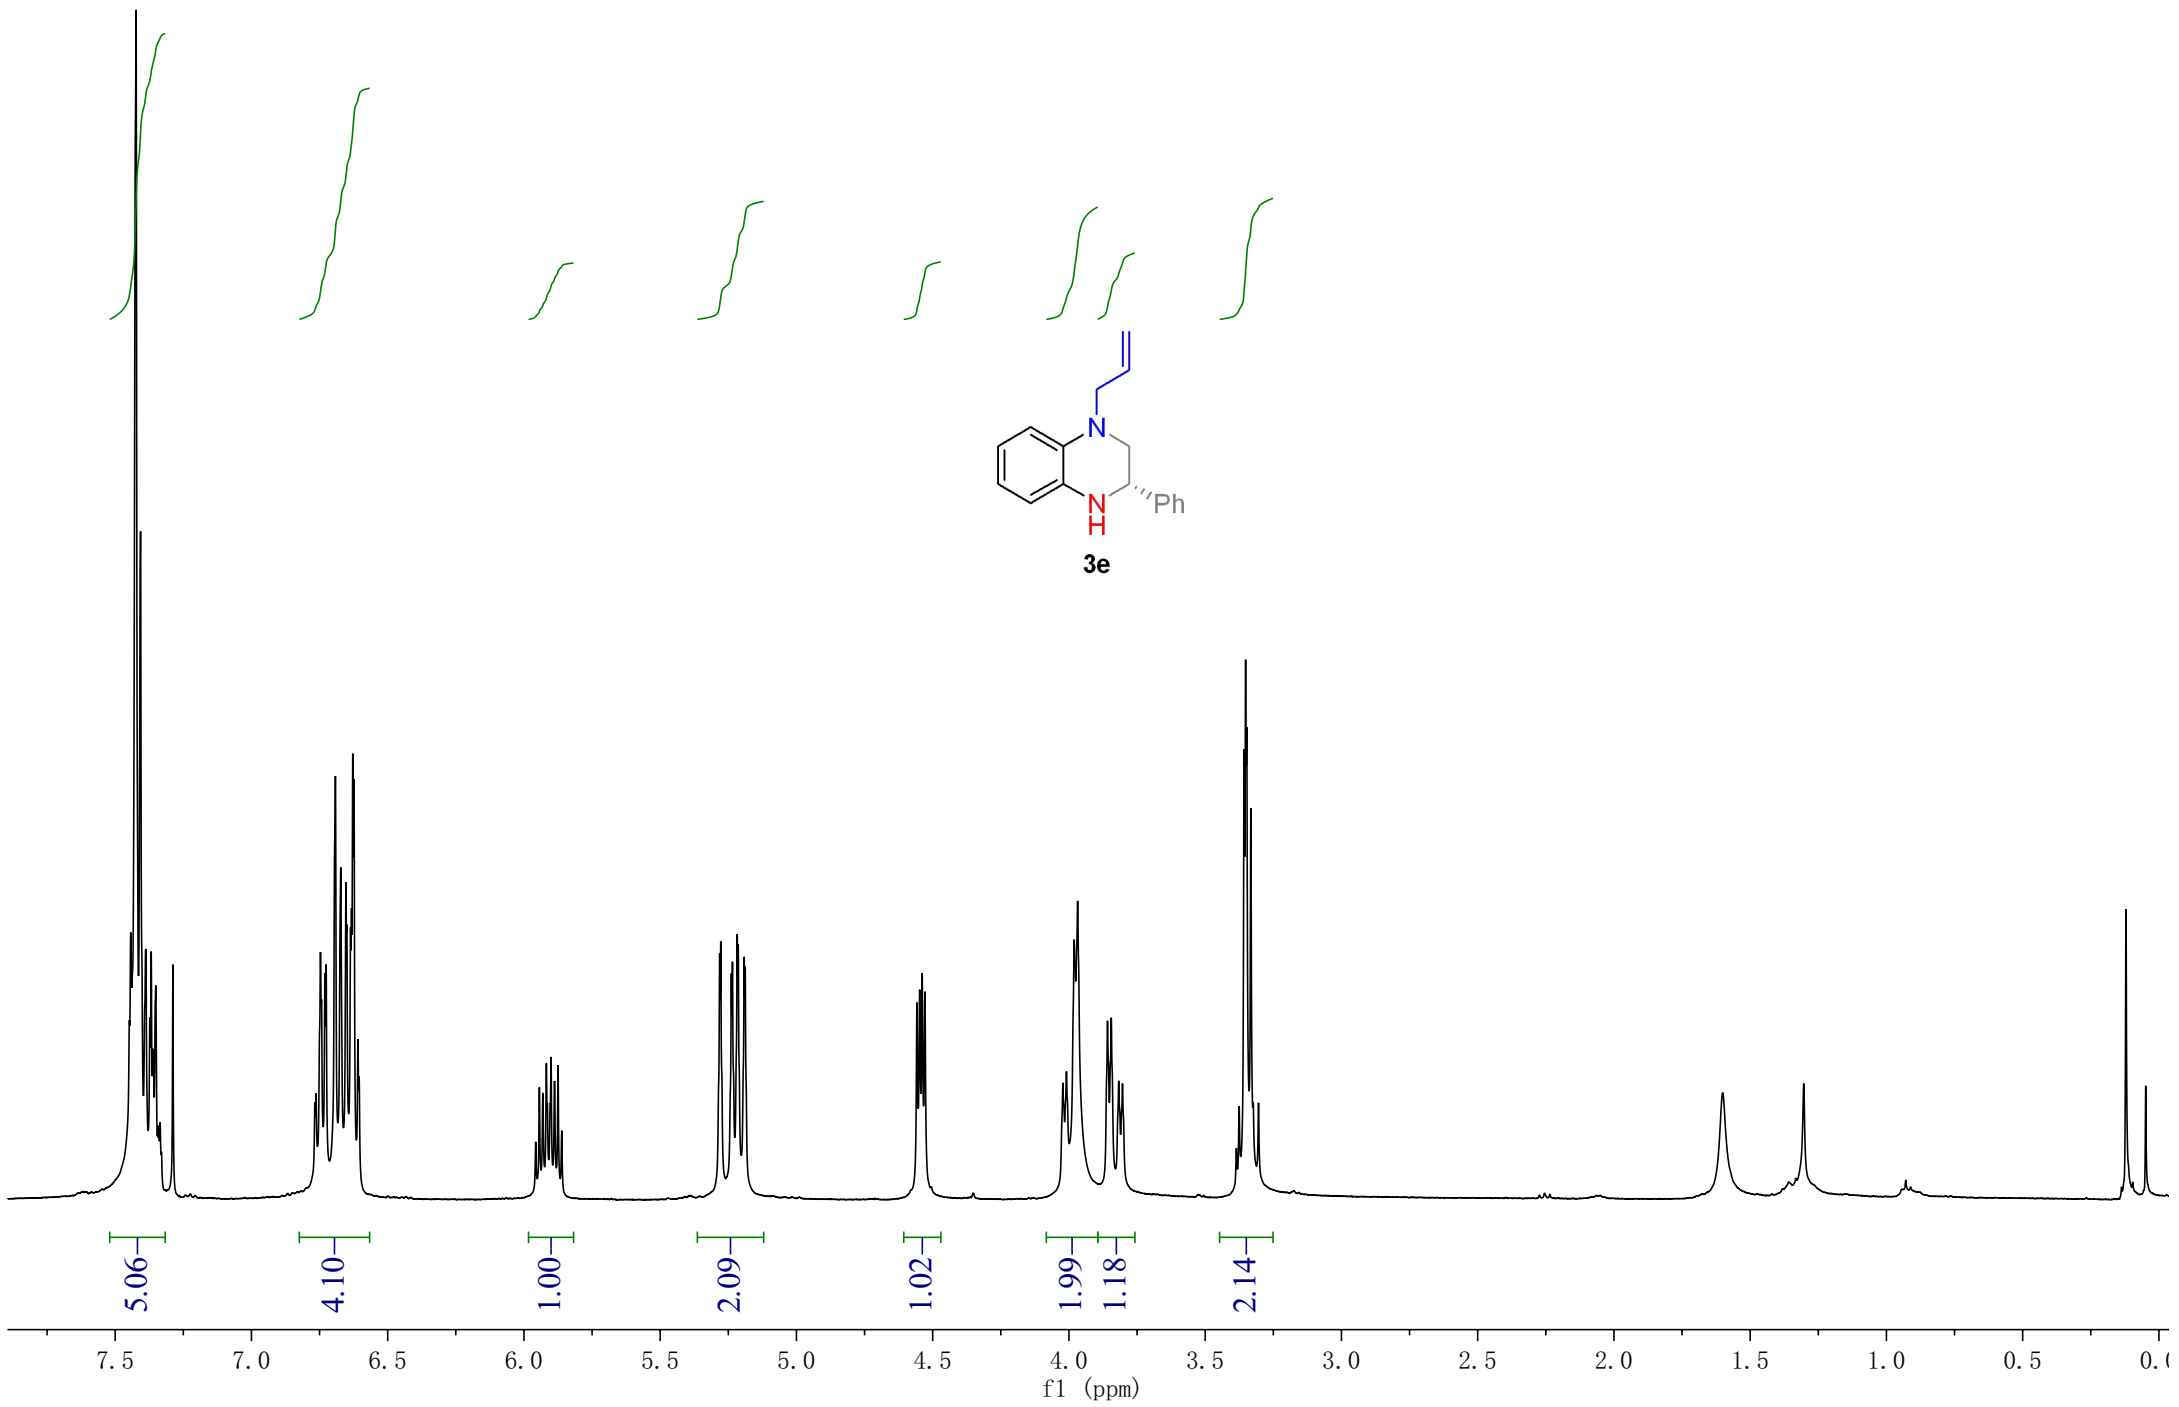

141.69  
134.49  
134.19  
133.52  
128.66  
127.96  
127.09  
119.09  
117.83  
116.86  
113.97  
112.01

55.38  
54.36  
54.05

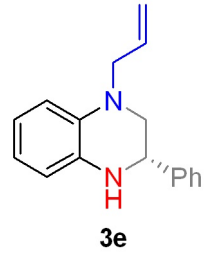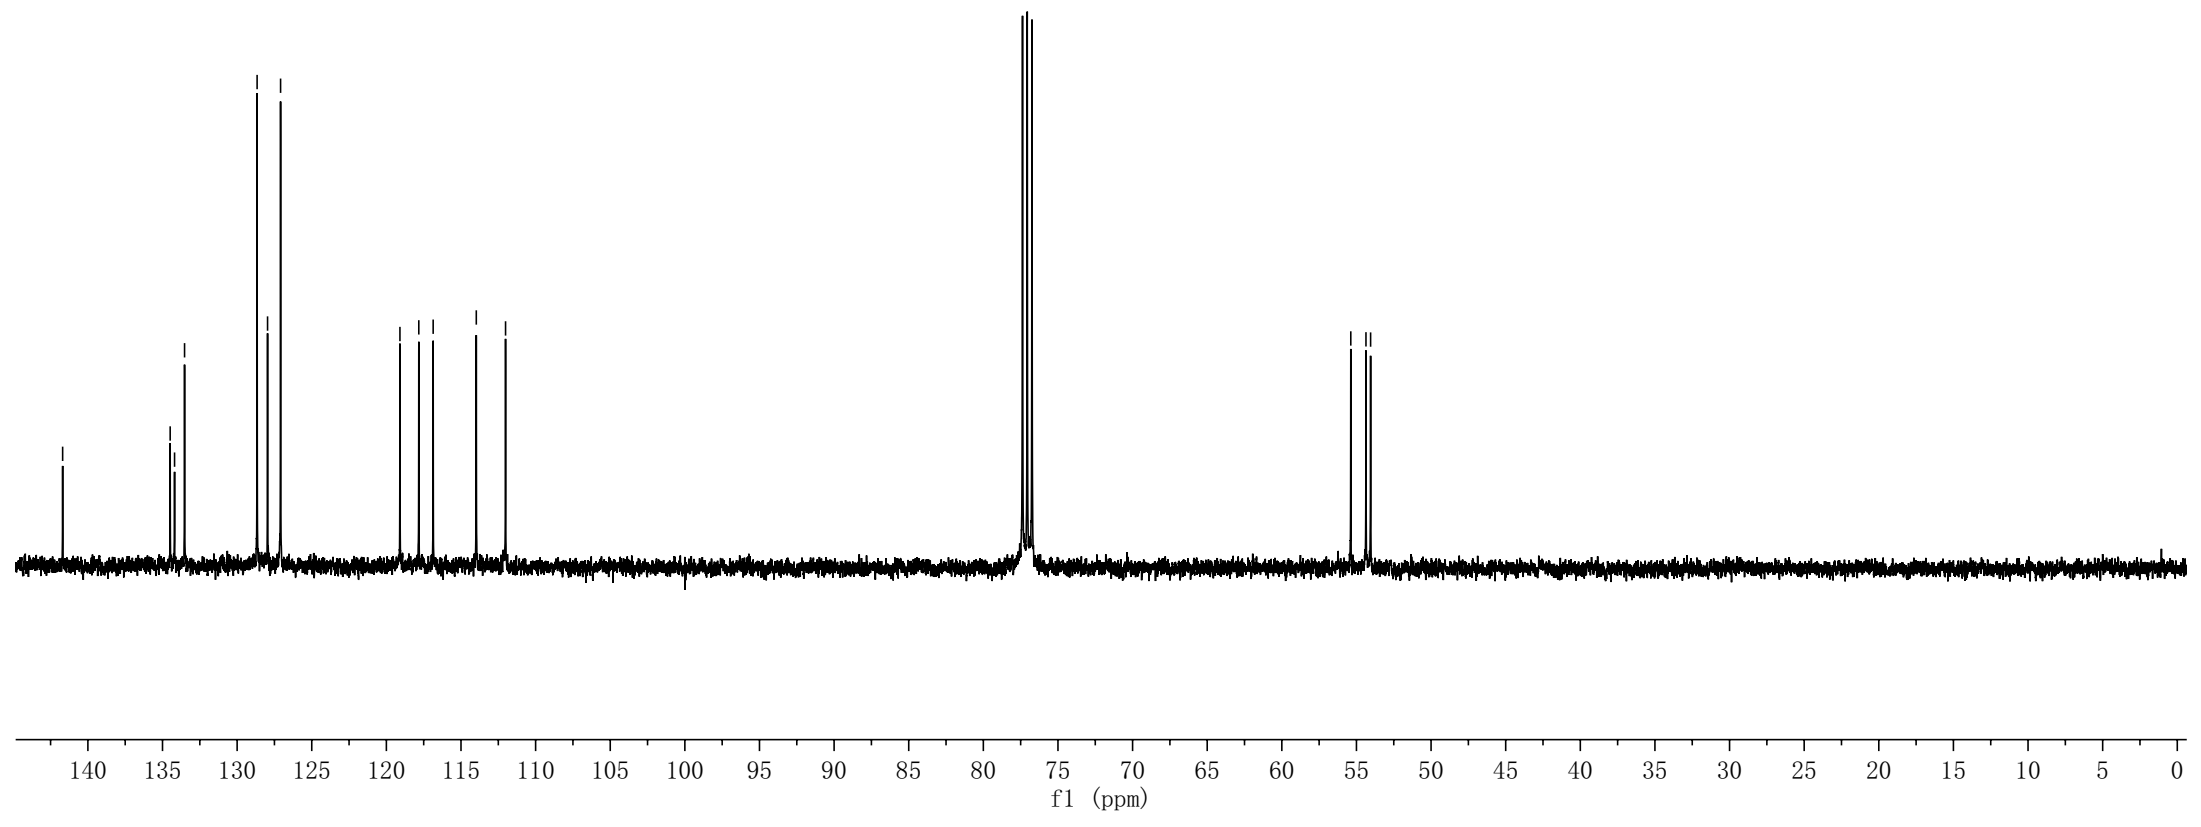

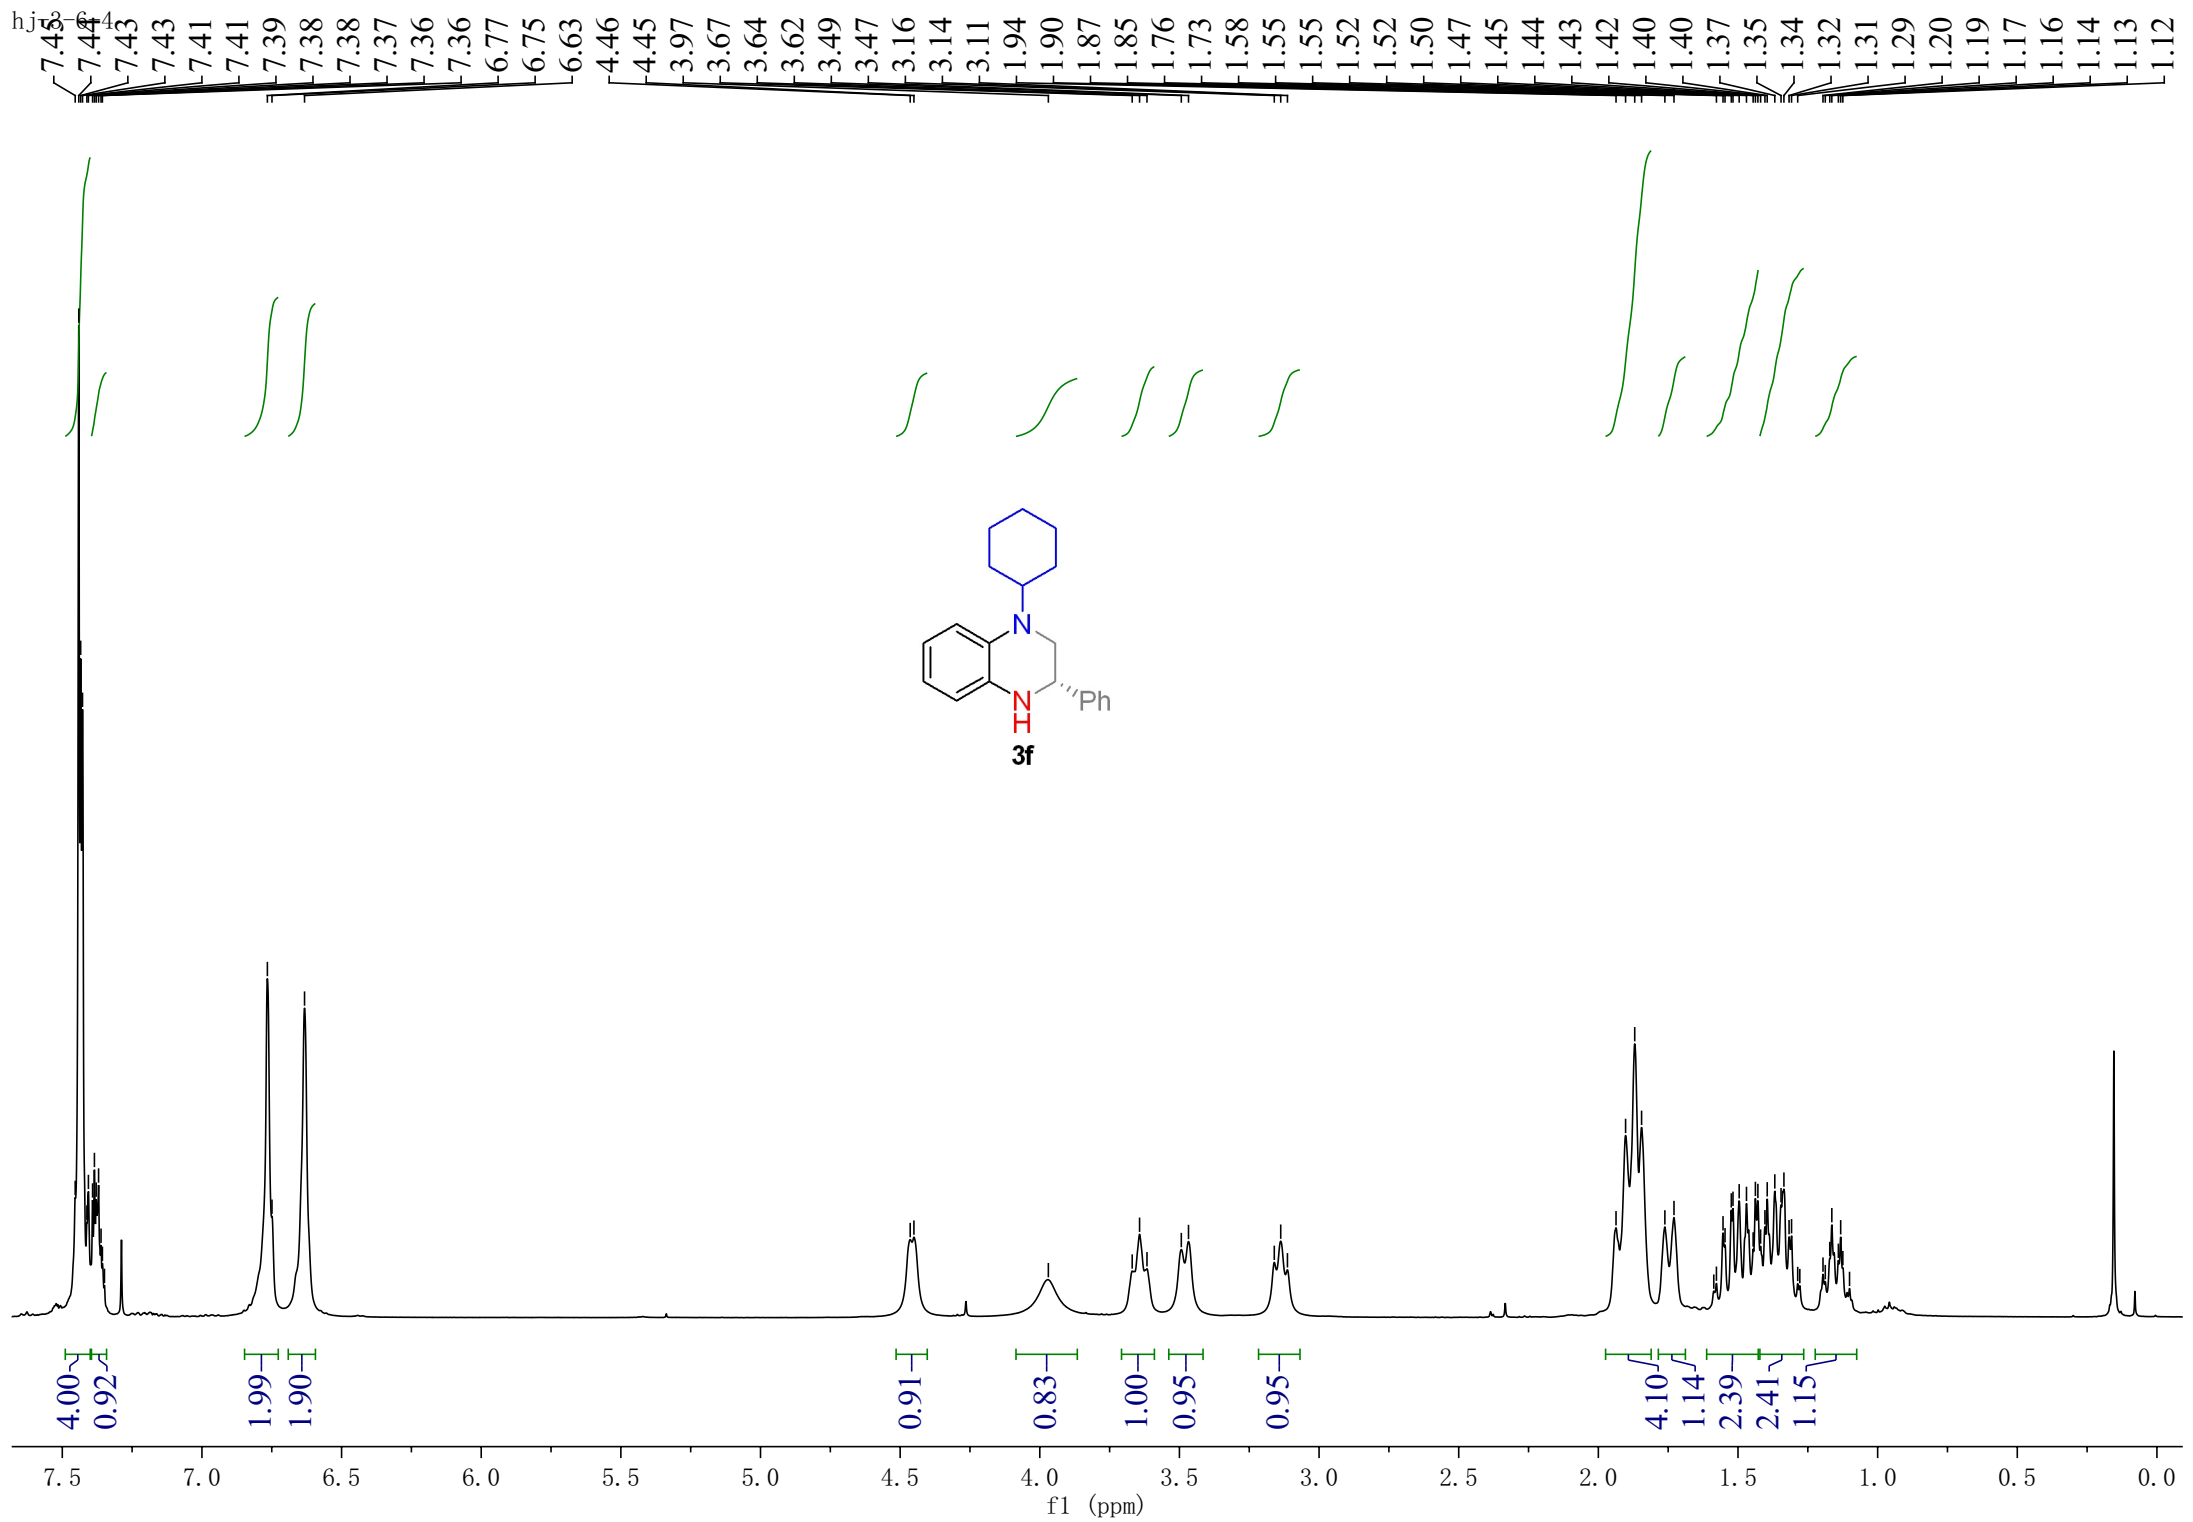

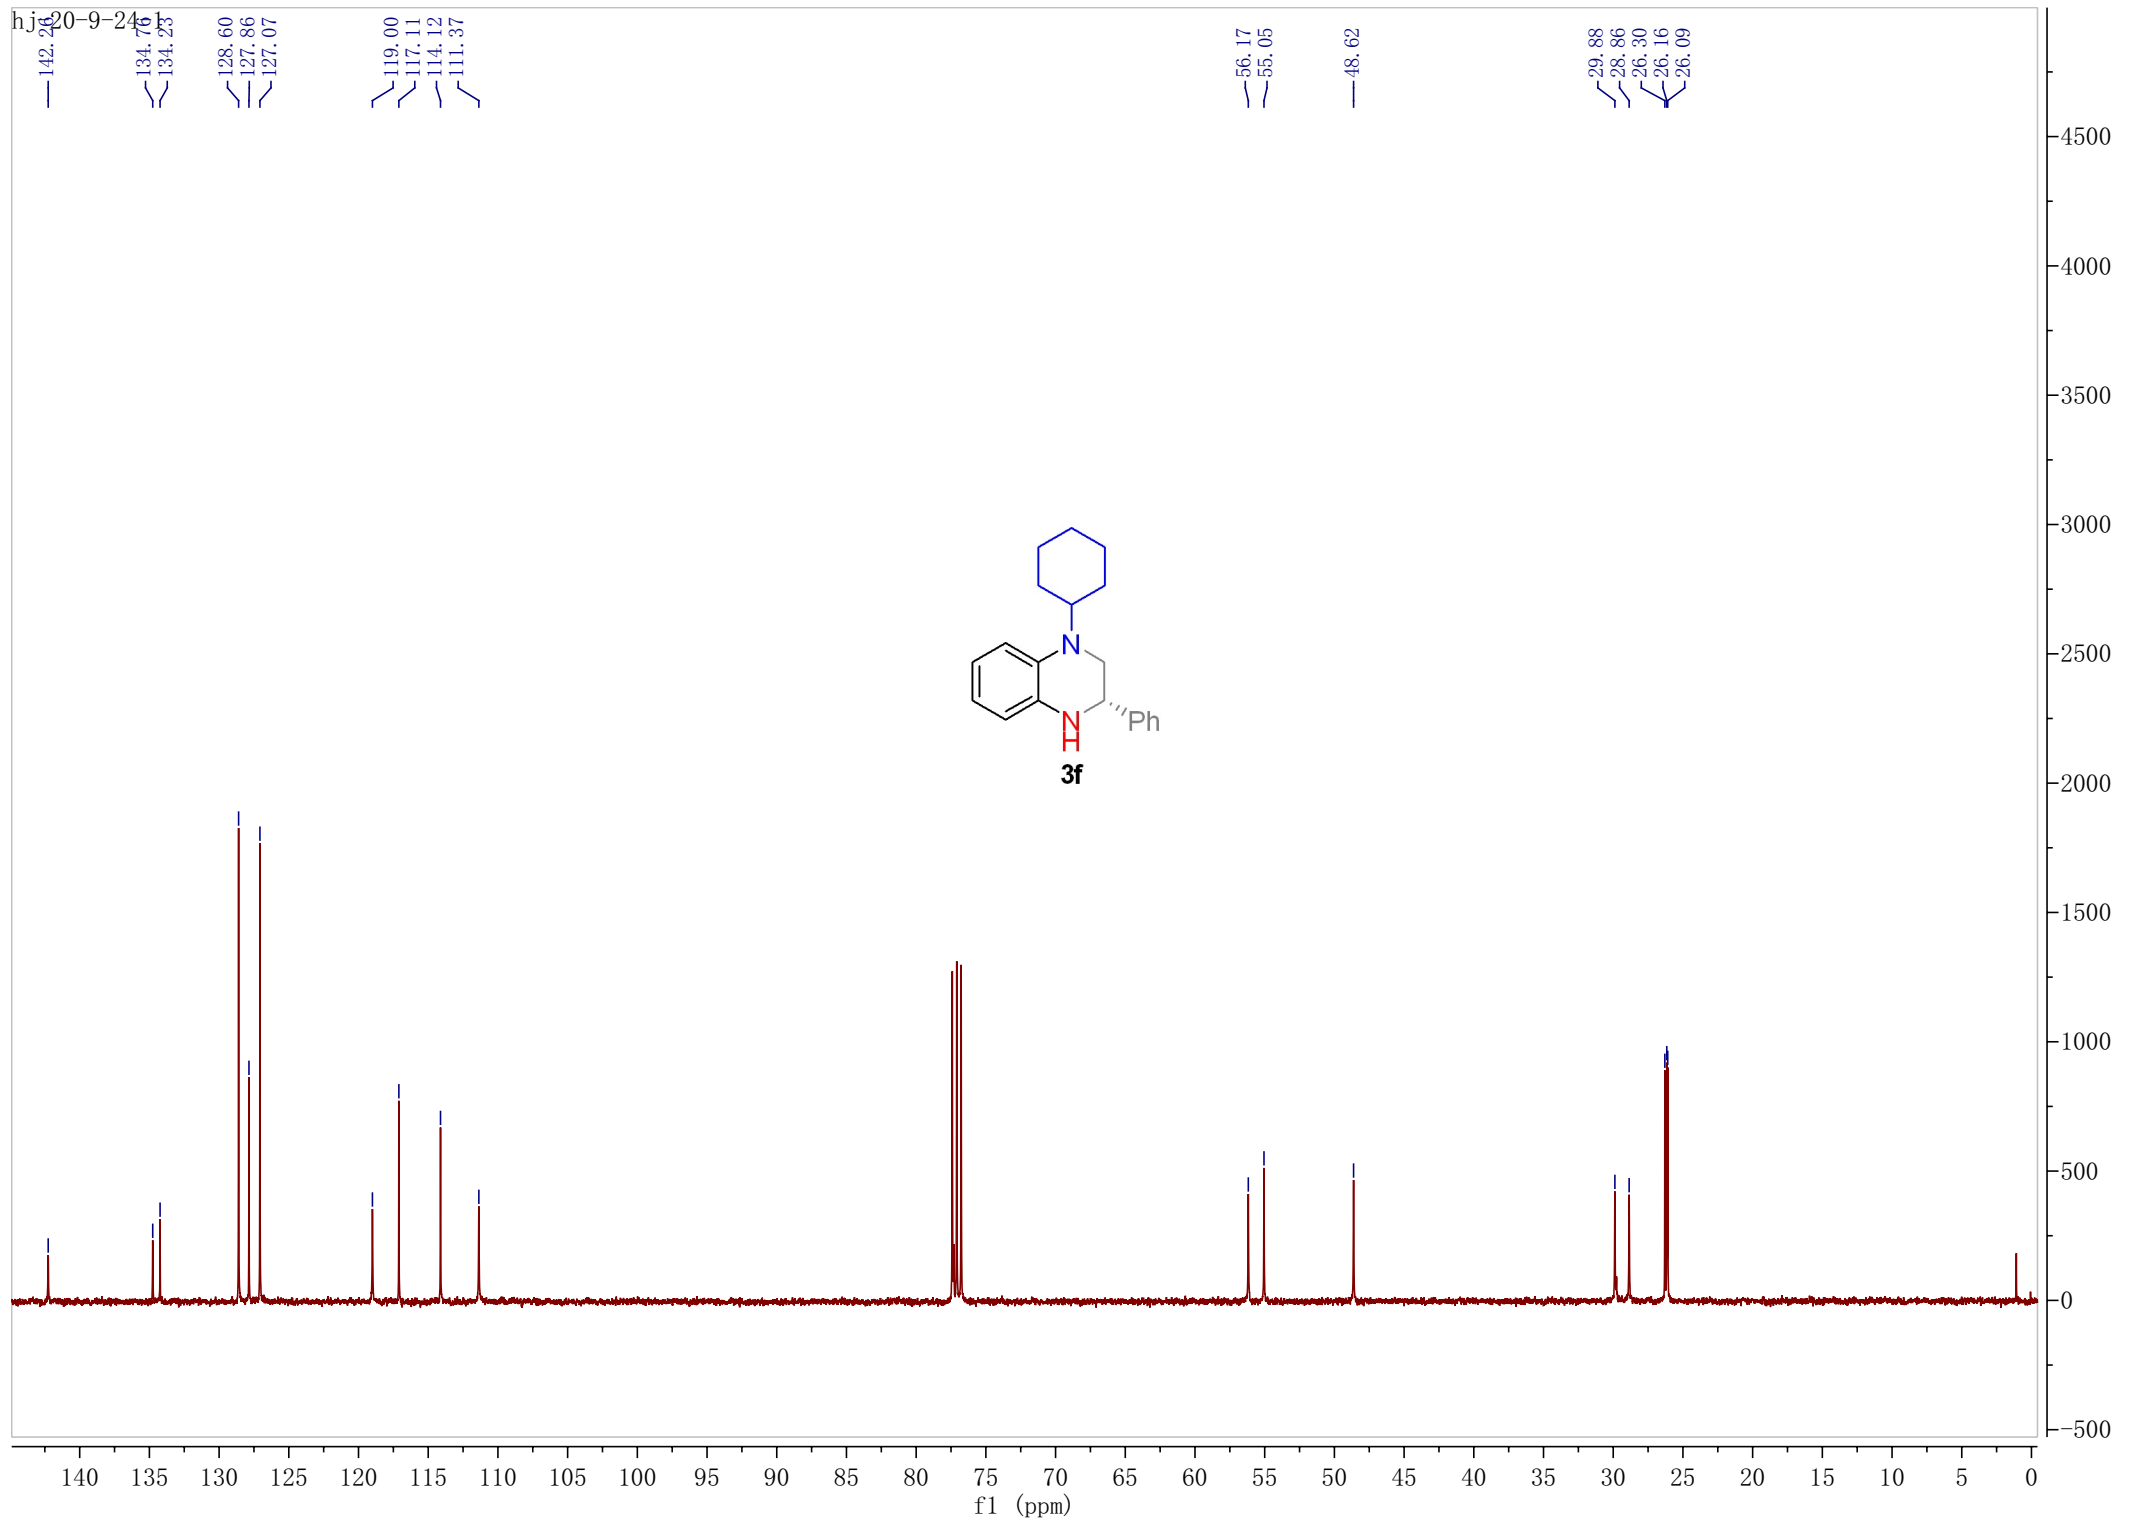

7.43  
7.42  
7.40  
7.38  
7.36  
7.34  
7.25  
7.24  
7.09  
7.07  
7.06  
7.00  
6.99  
6.83  
6.75  
6.73  
6.68

4.56  
4.20  
3.88  
3.60

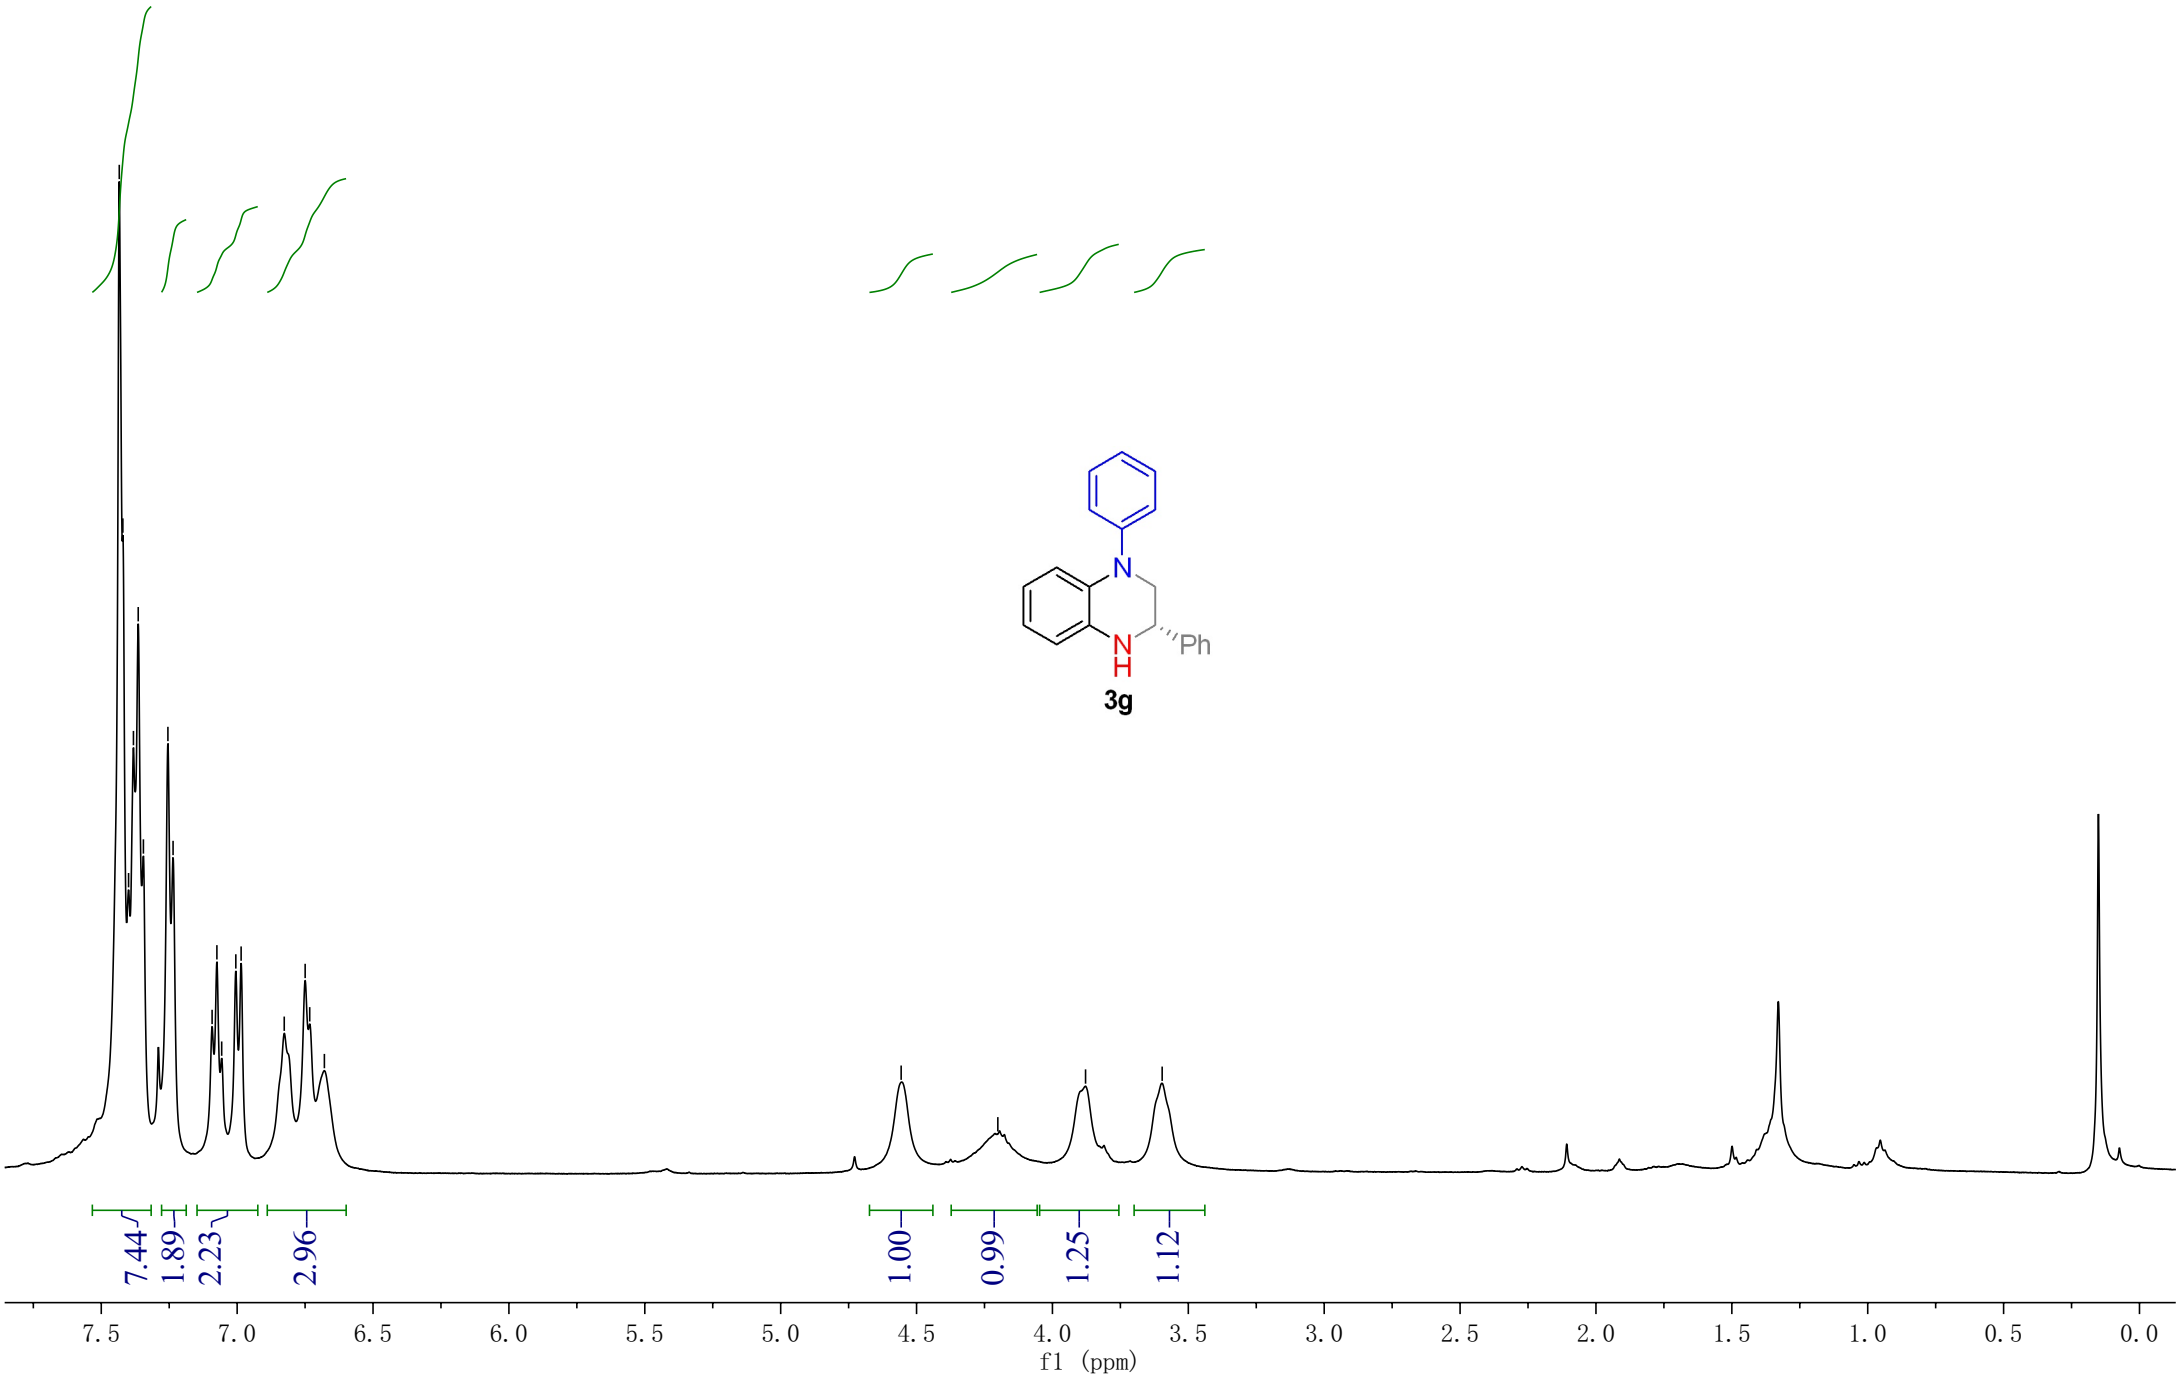

—148.00  
—141.09  
—135.81  
—130.96  
—129.31  
—128.76  
—128.08  
—127.07  
—122.92  
—122.63  
—120.82  
—118.11  
—117.48  
—114.88

~56.00  
~54.04

—29.77

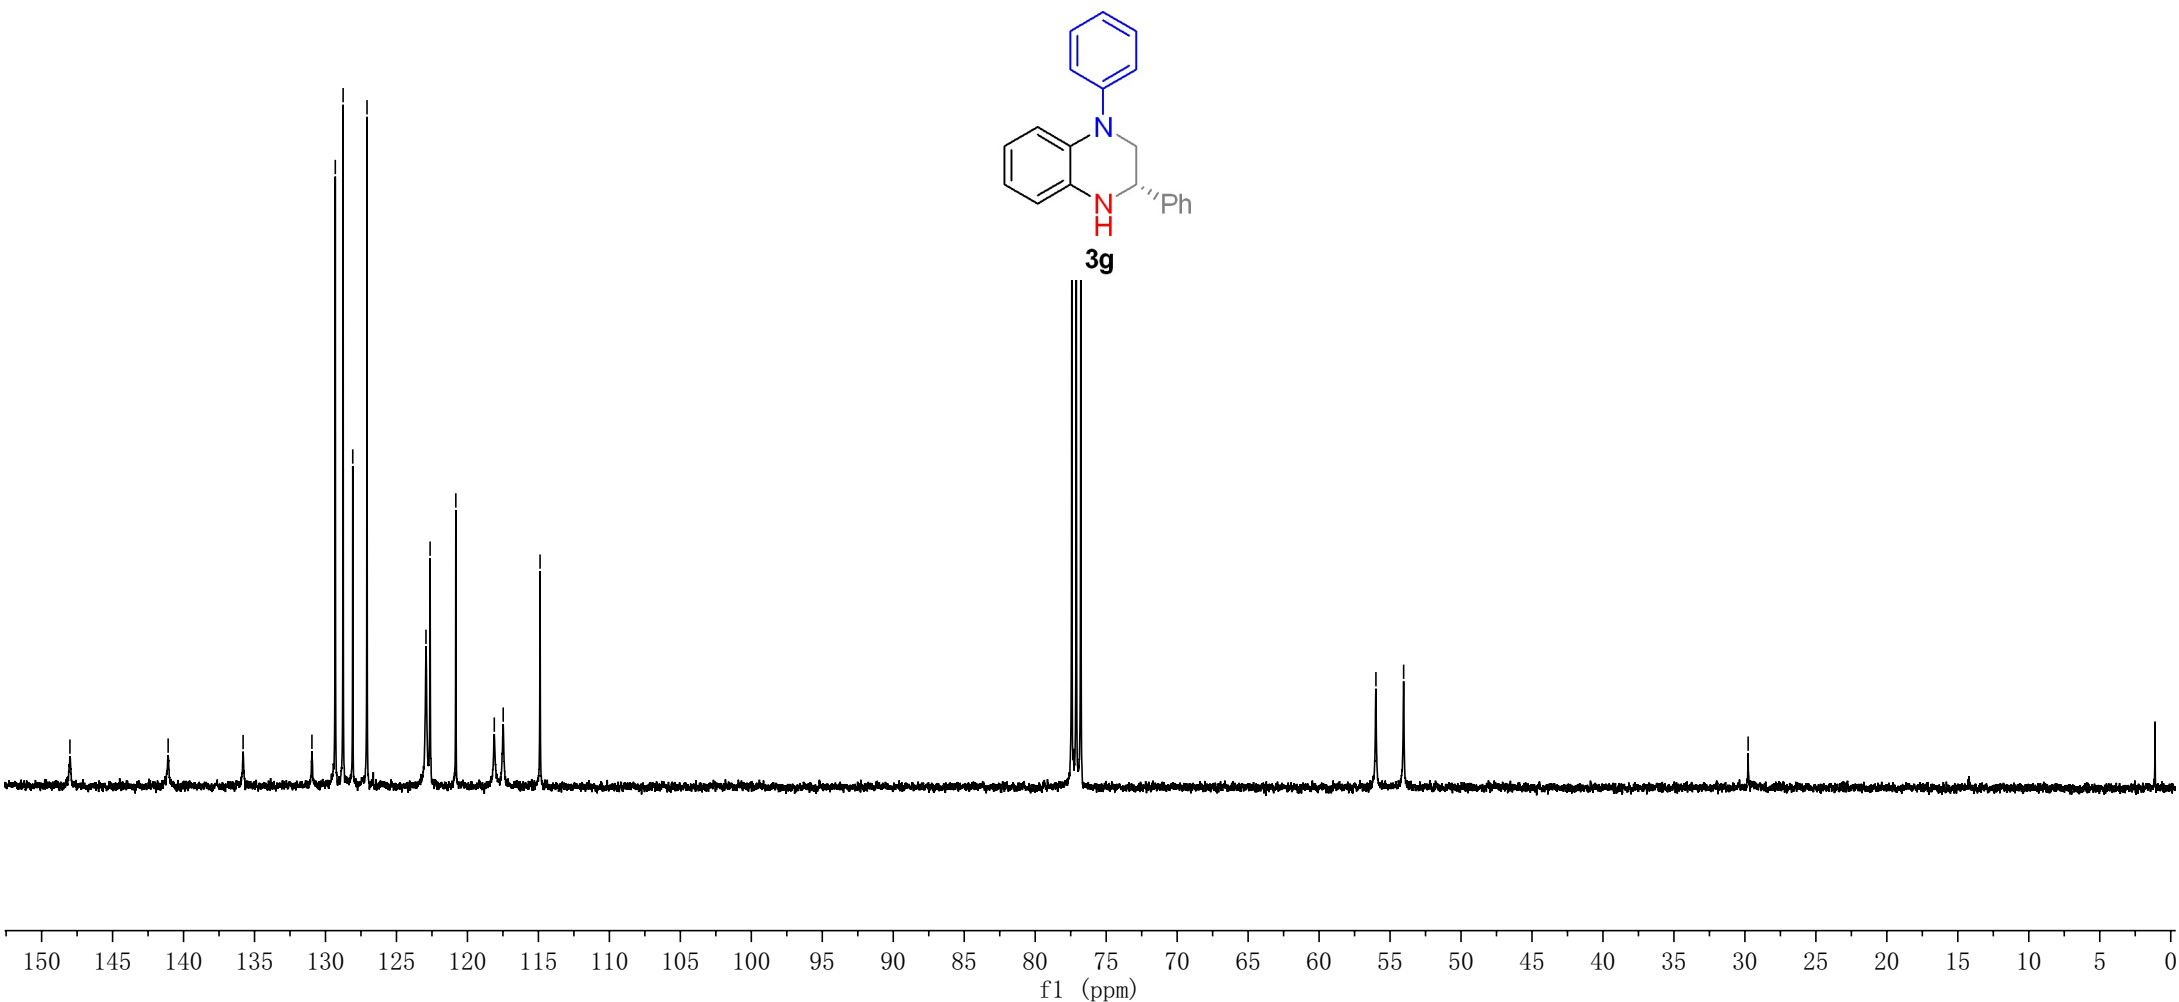

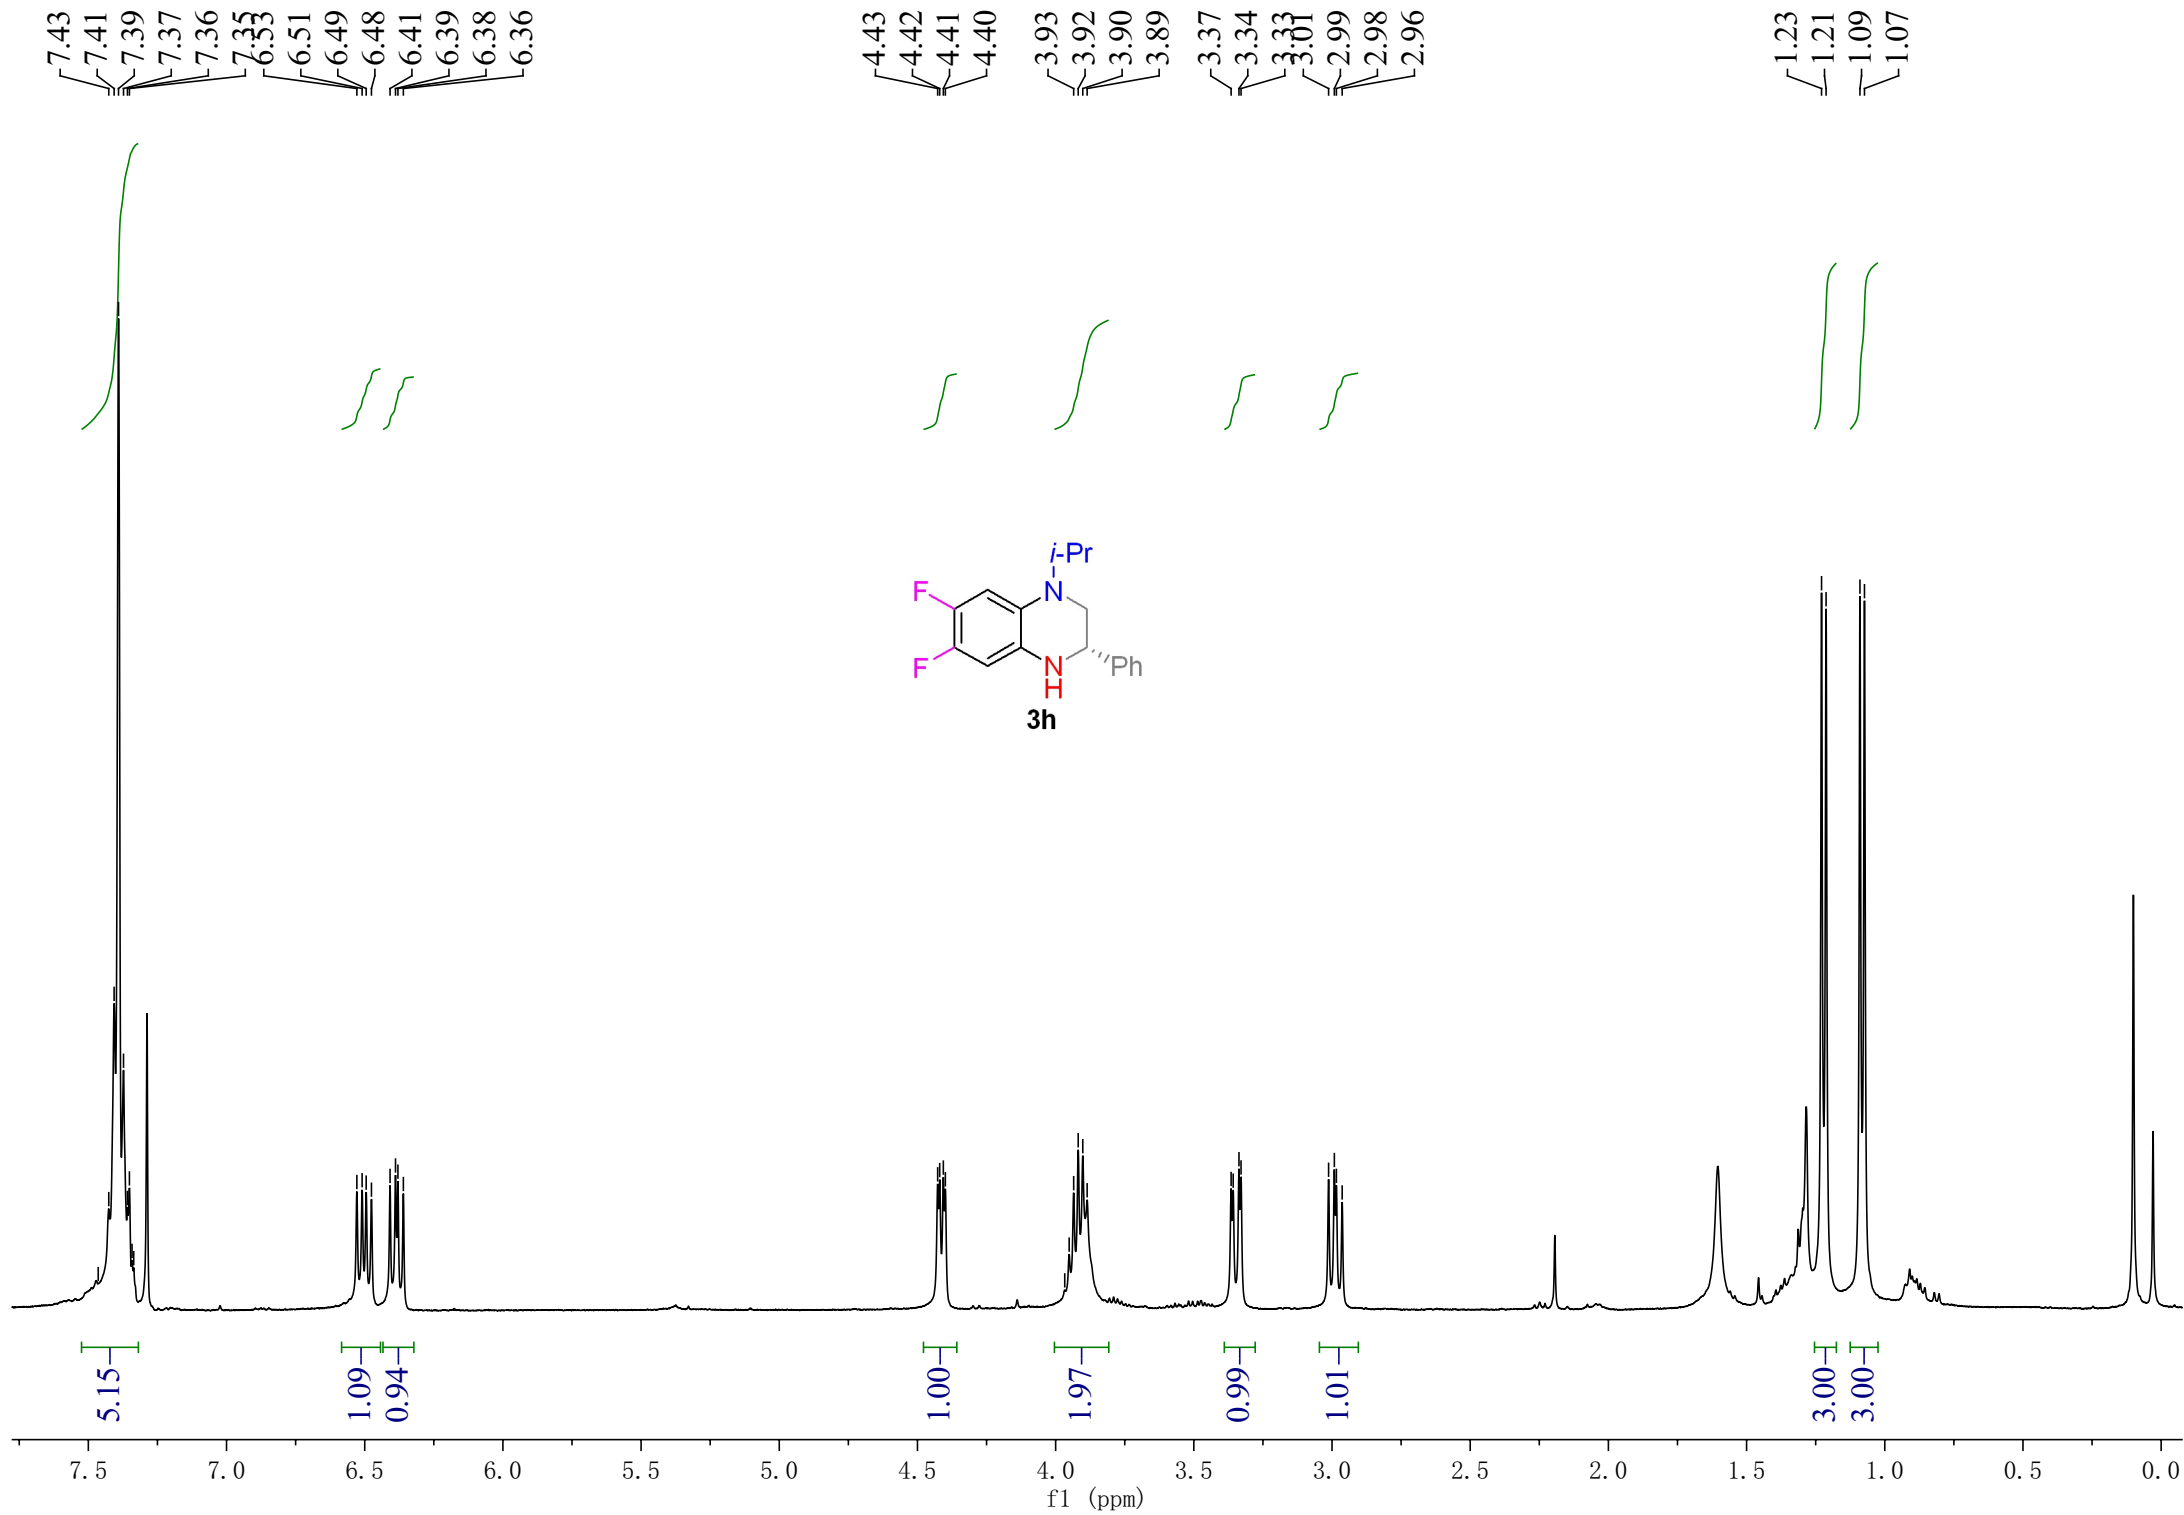



141.59  
140.77  
140.64  
130.69  
130.67  
130.61  
130.59  
130.46  
130.44  
130.38  
130.36  
128.69  
128.08  
126.94  
102.32  
102.11  
100.54  
100.32

54.96  
47.53  
46.62

19.24  
17.68

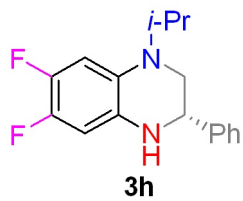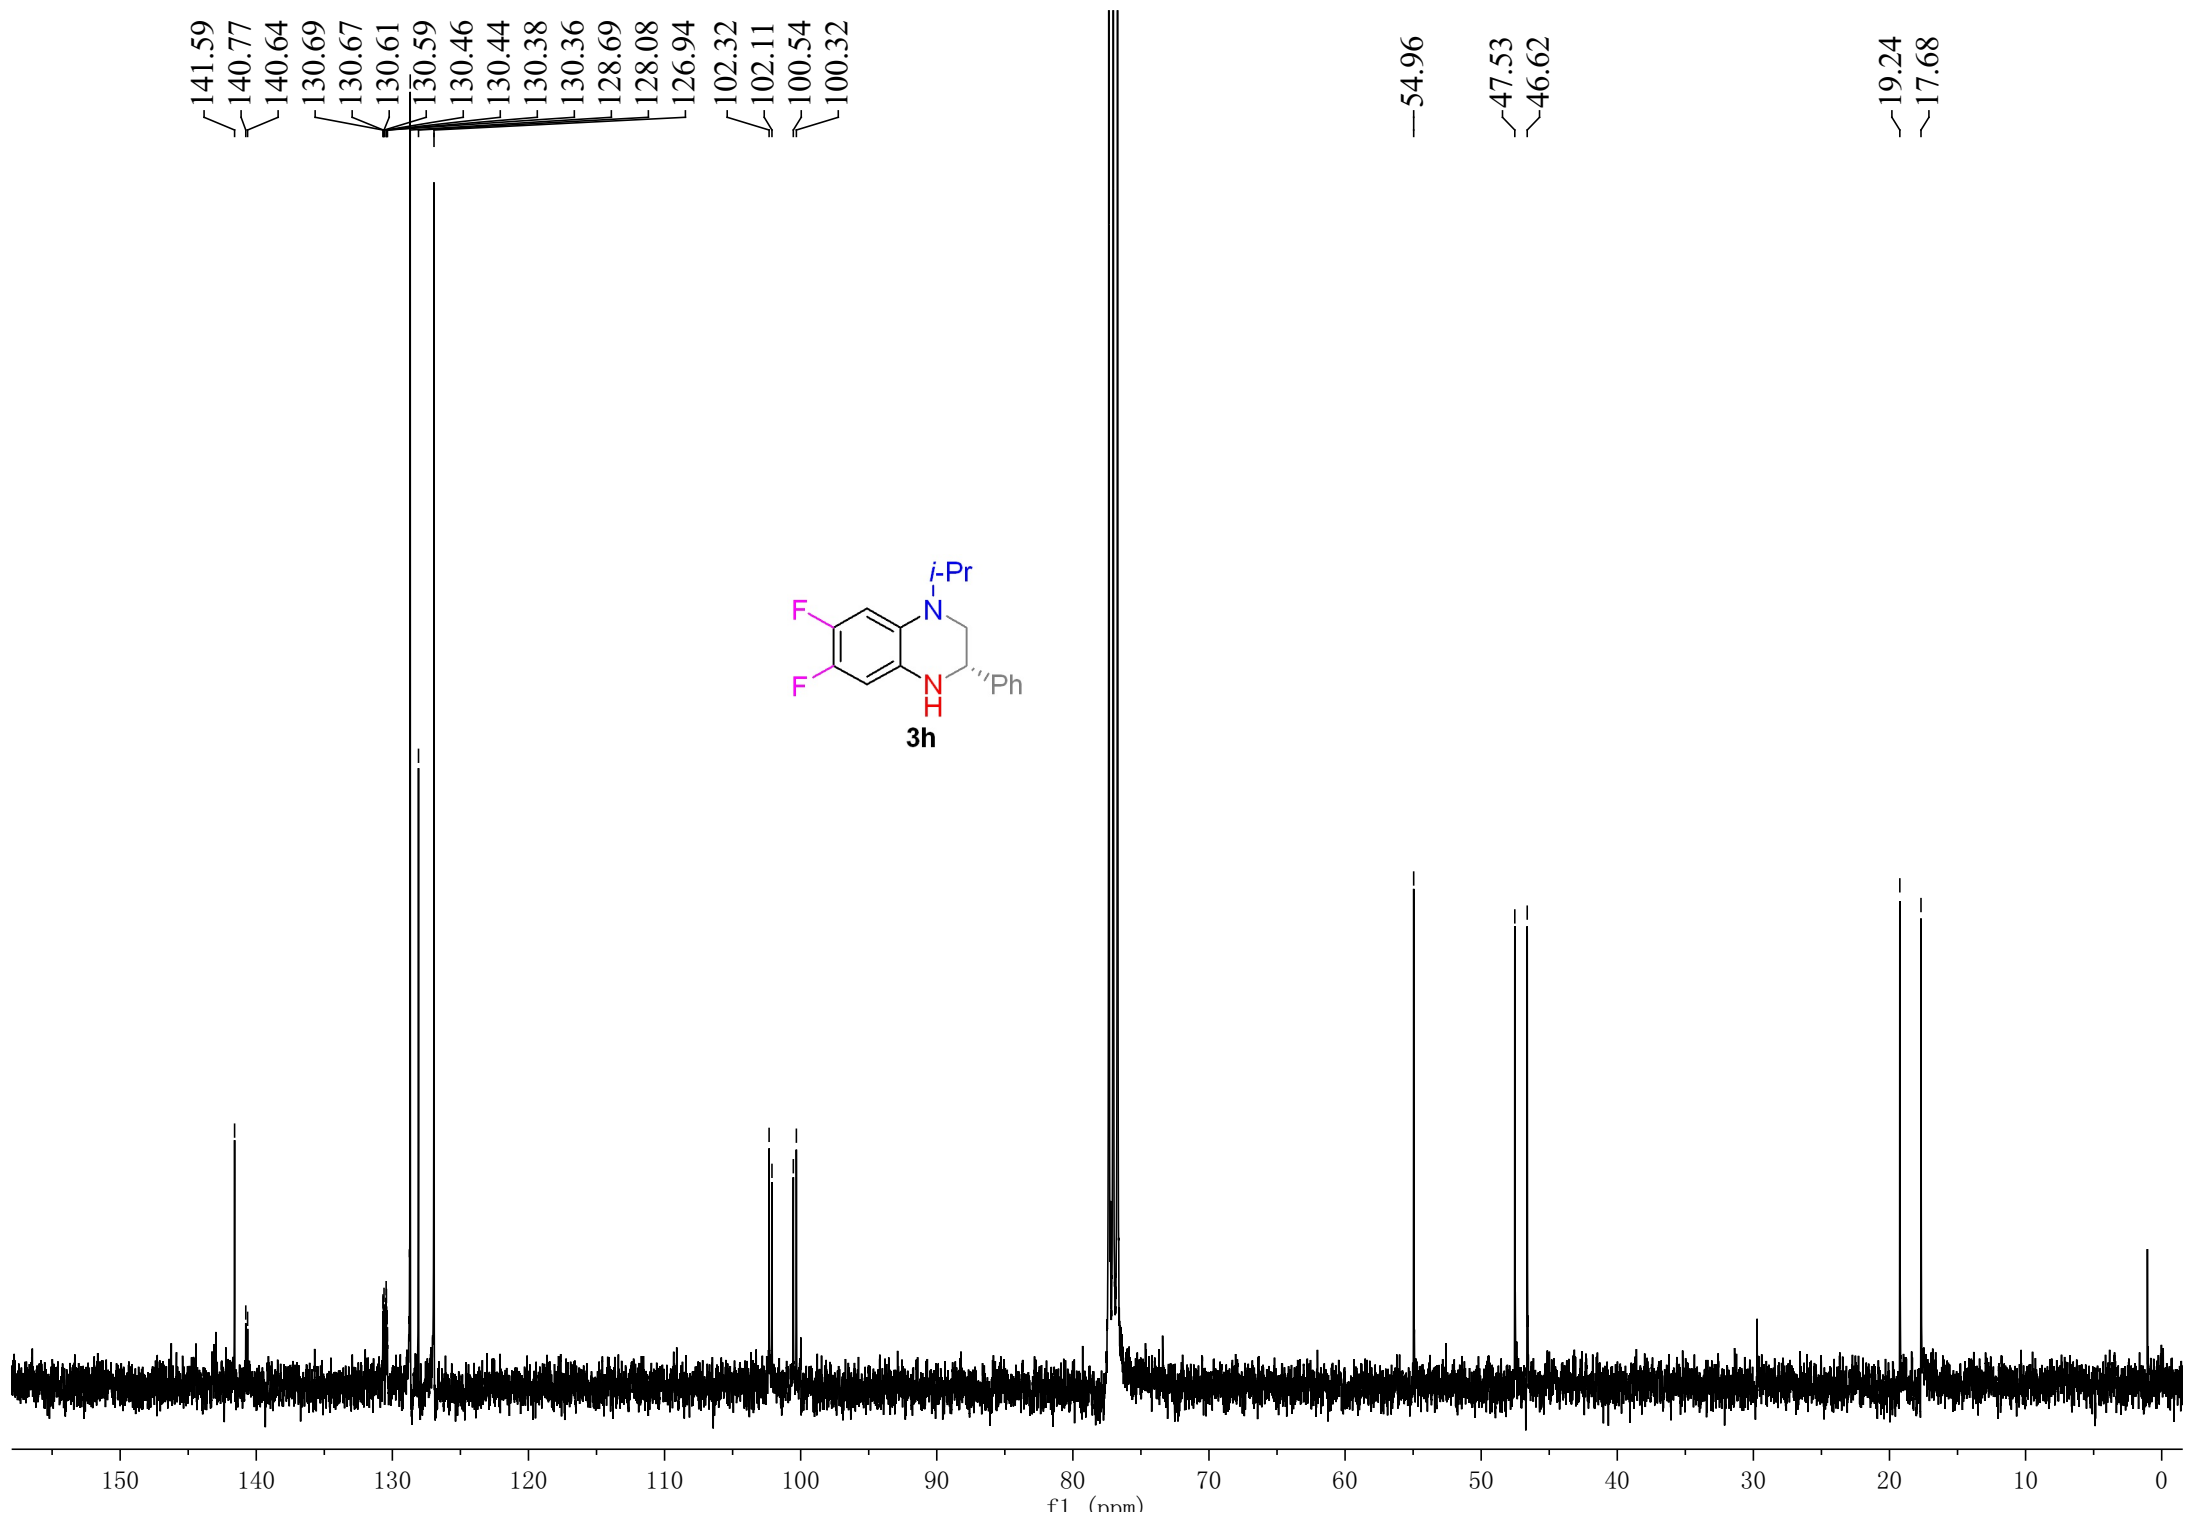

hj-20-12-11-3

150.92  
150.98

153.33  
153.39

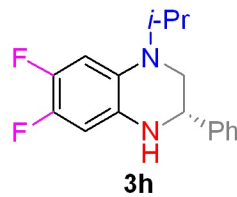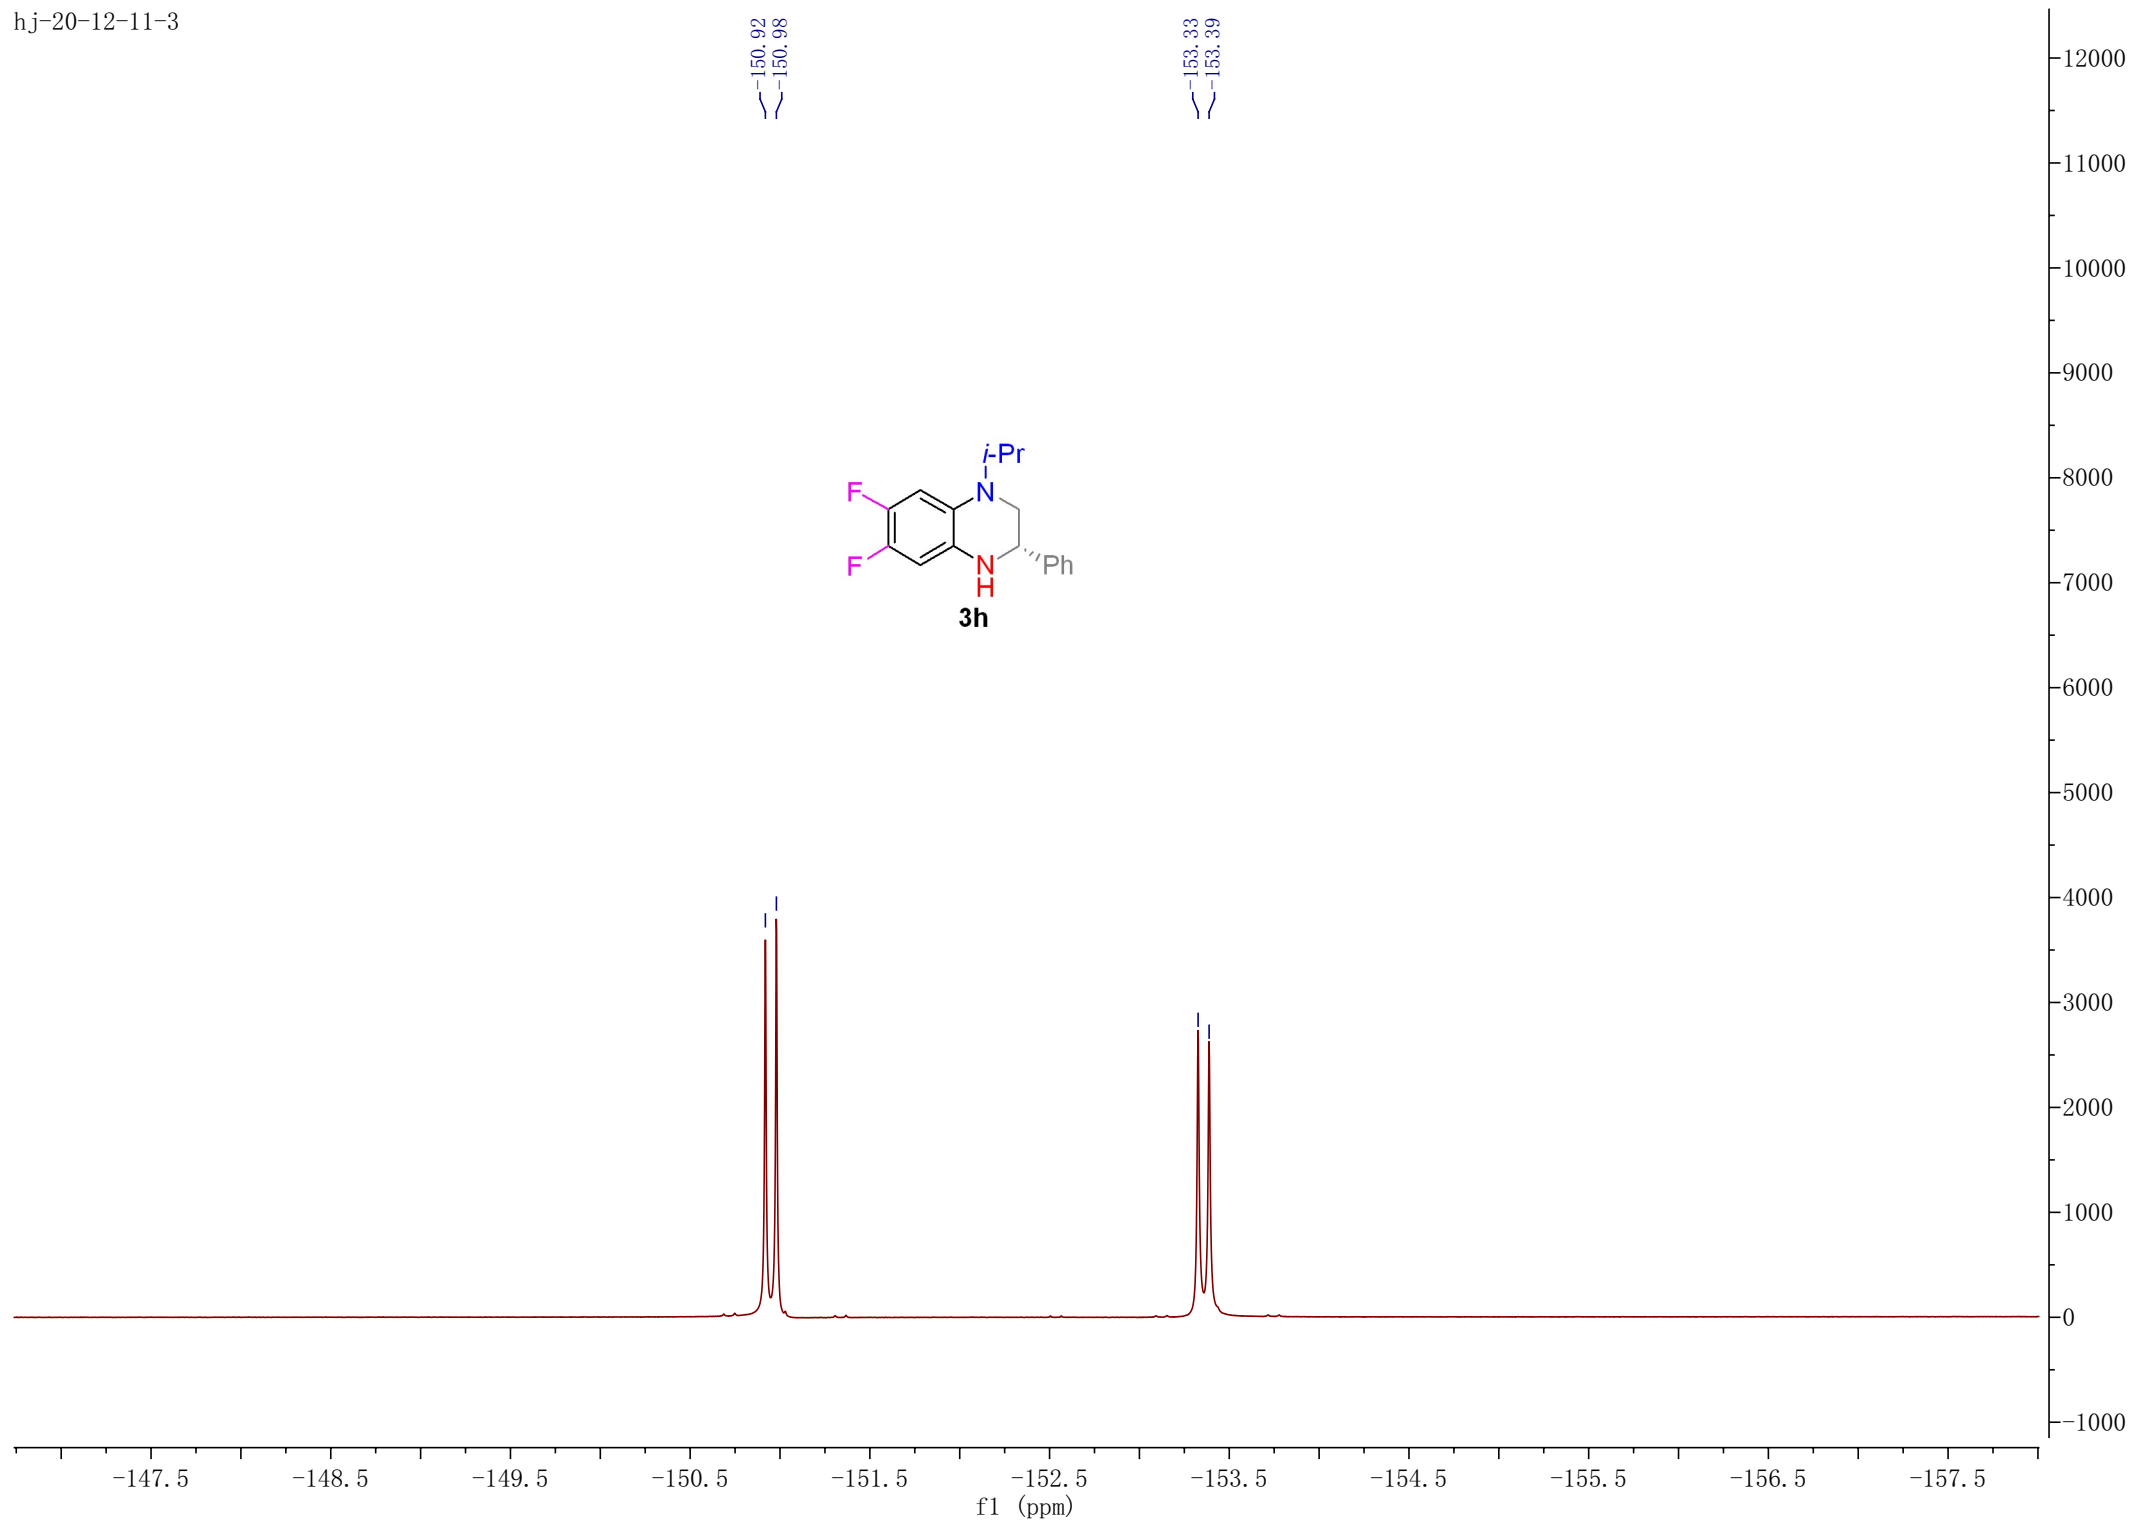

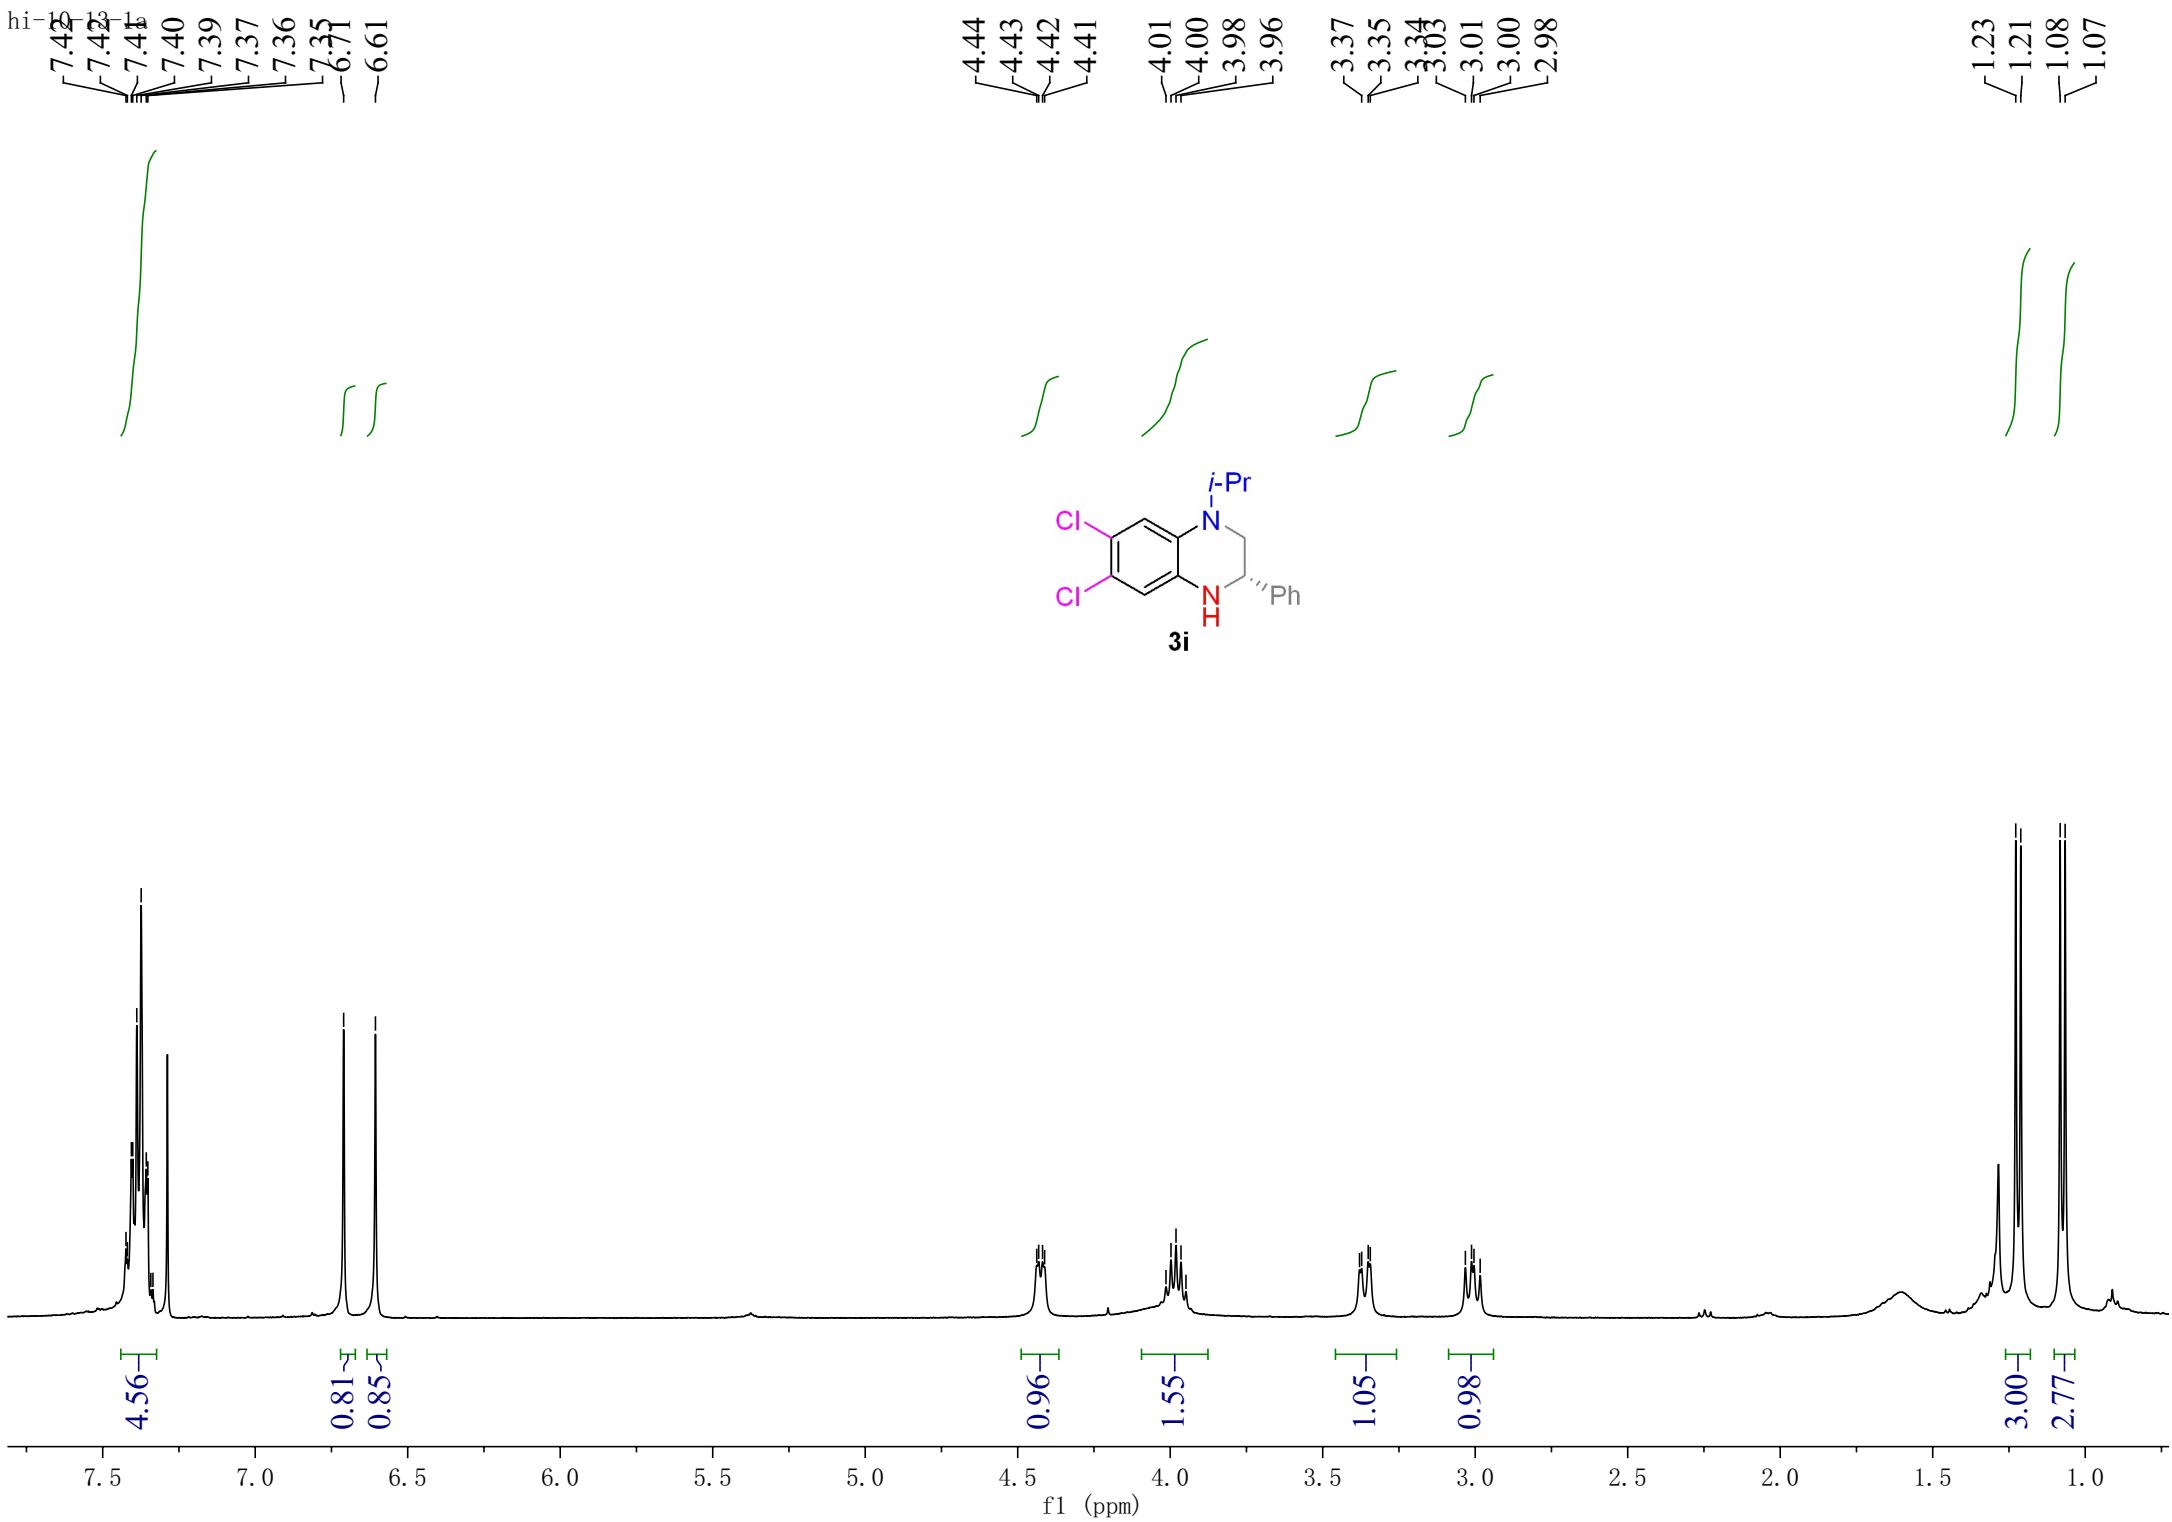

hj-1013-1

—141.40  
~134.49  
~133.99  
~128.72  
~128.15  
~126.88  
~120.84  
~119.00  
~114.06  
~112.09

—54.69  
~47.17  
~46.30  
~19.11  
~17.89

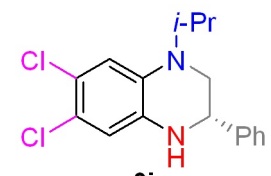

3i

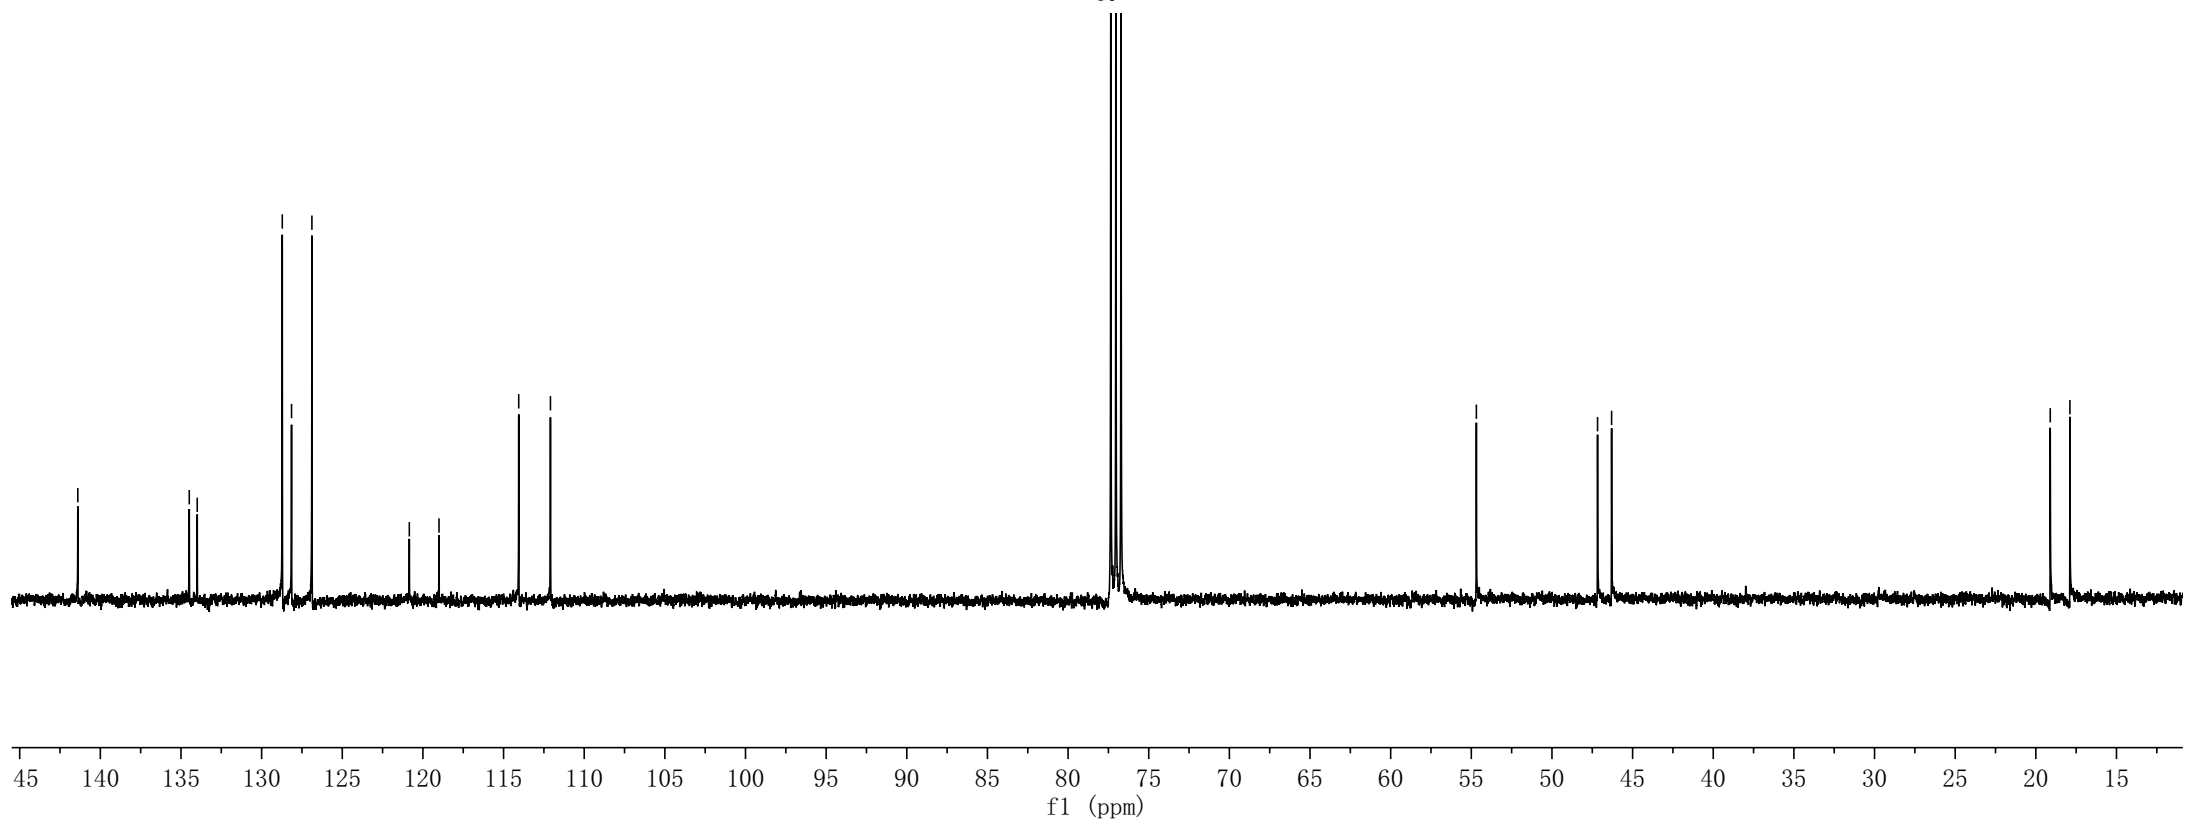

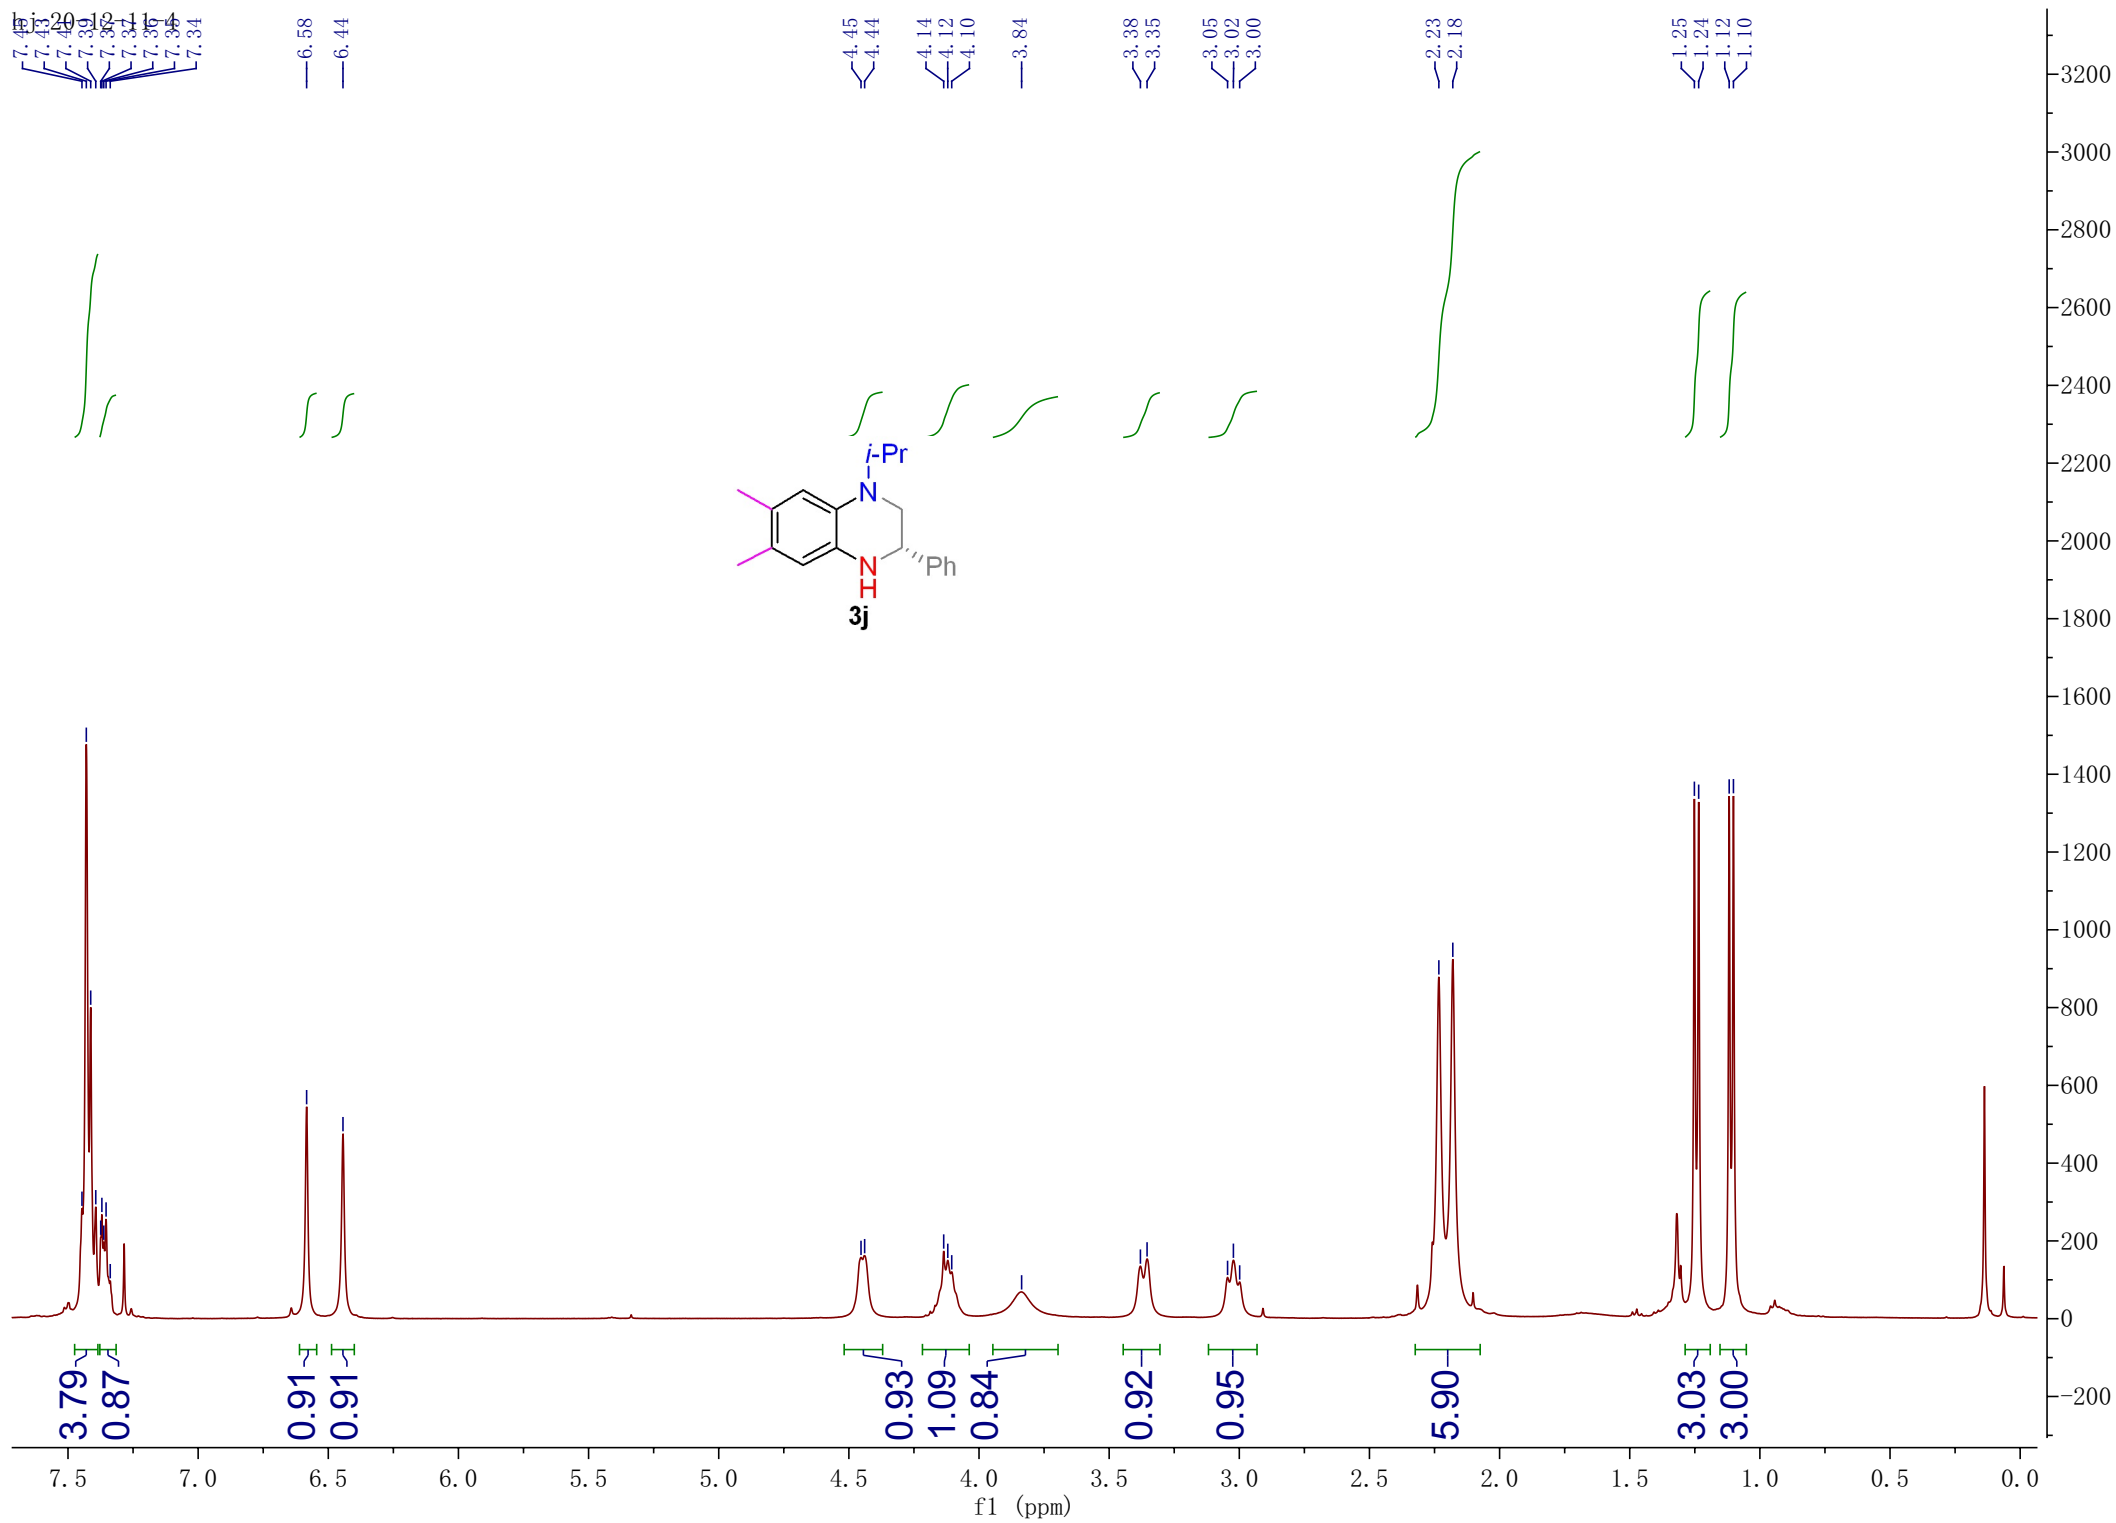

hj20-12-11-46

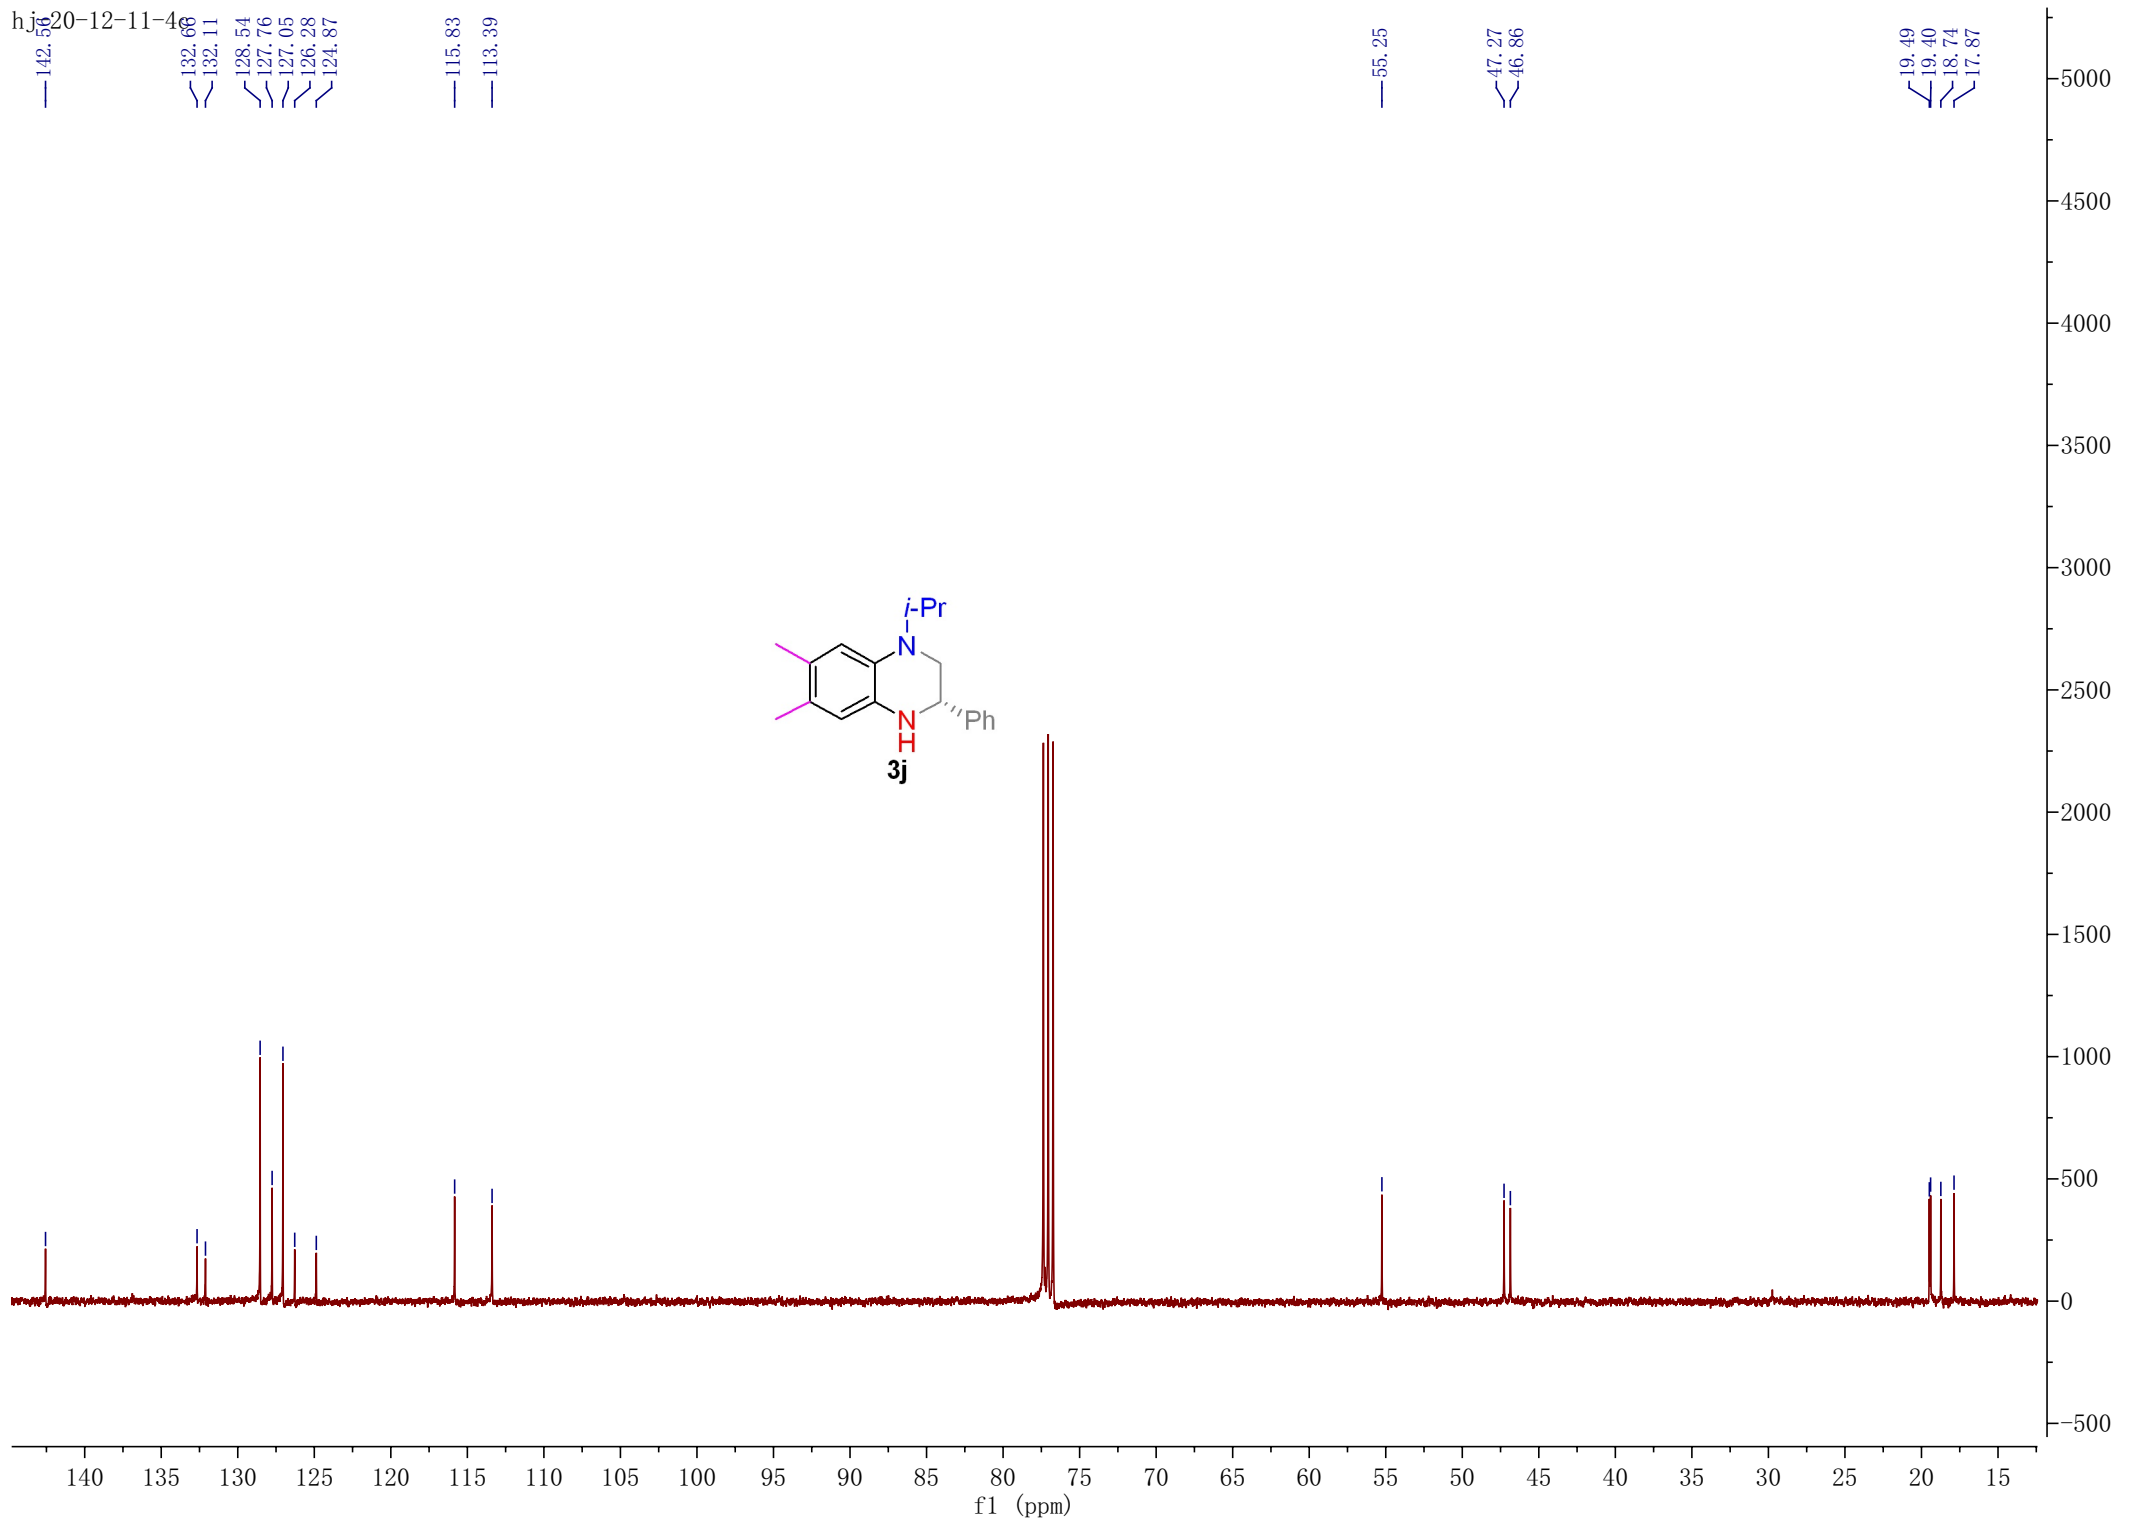

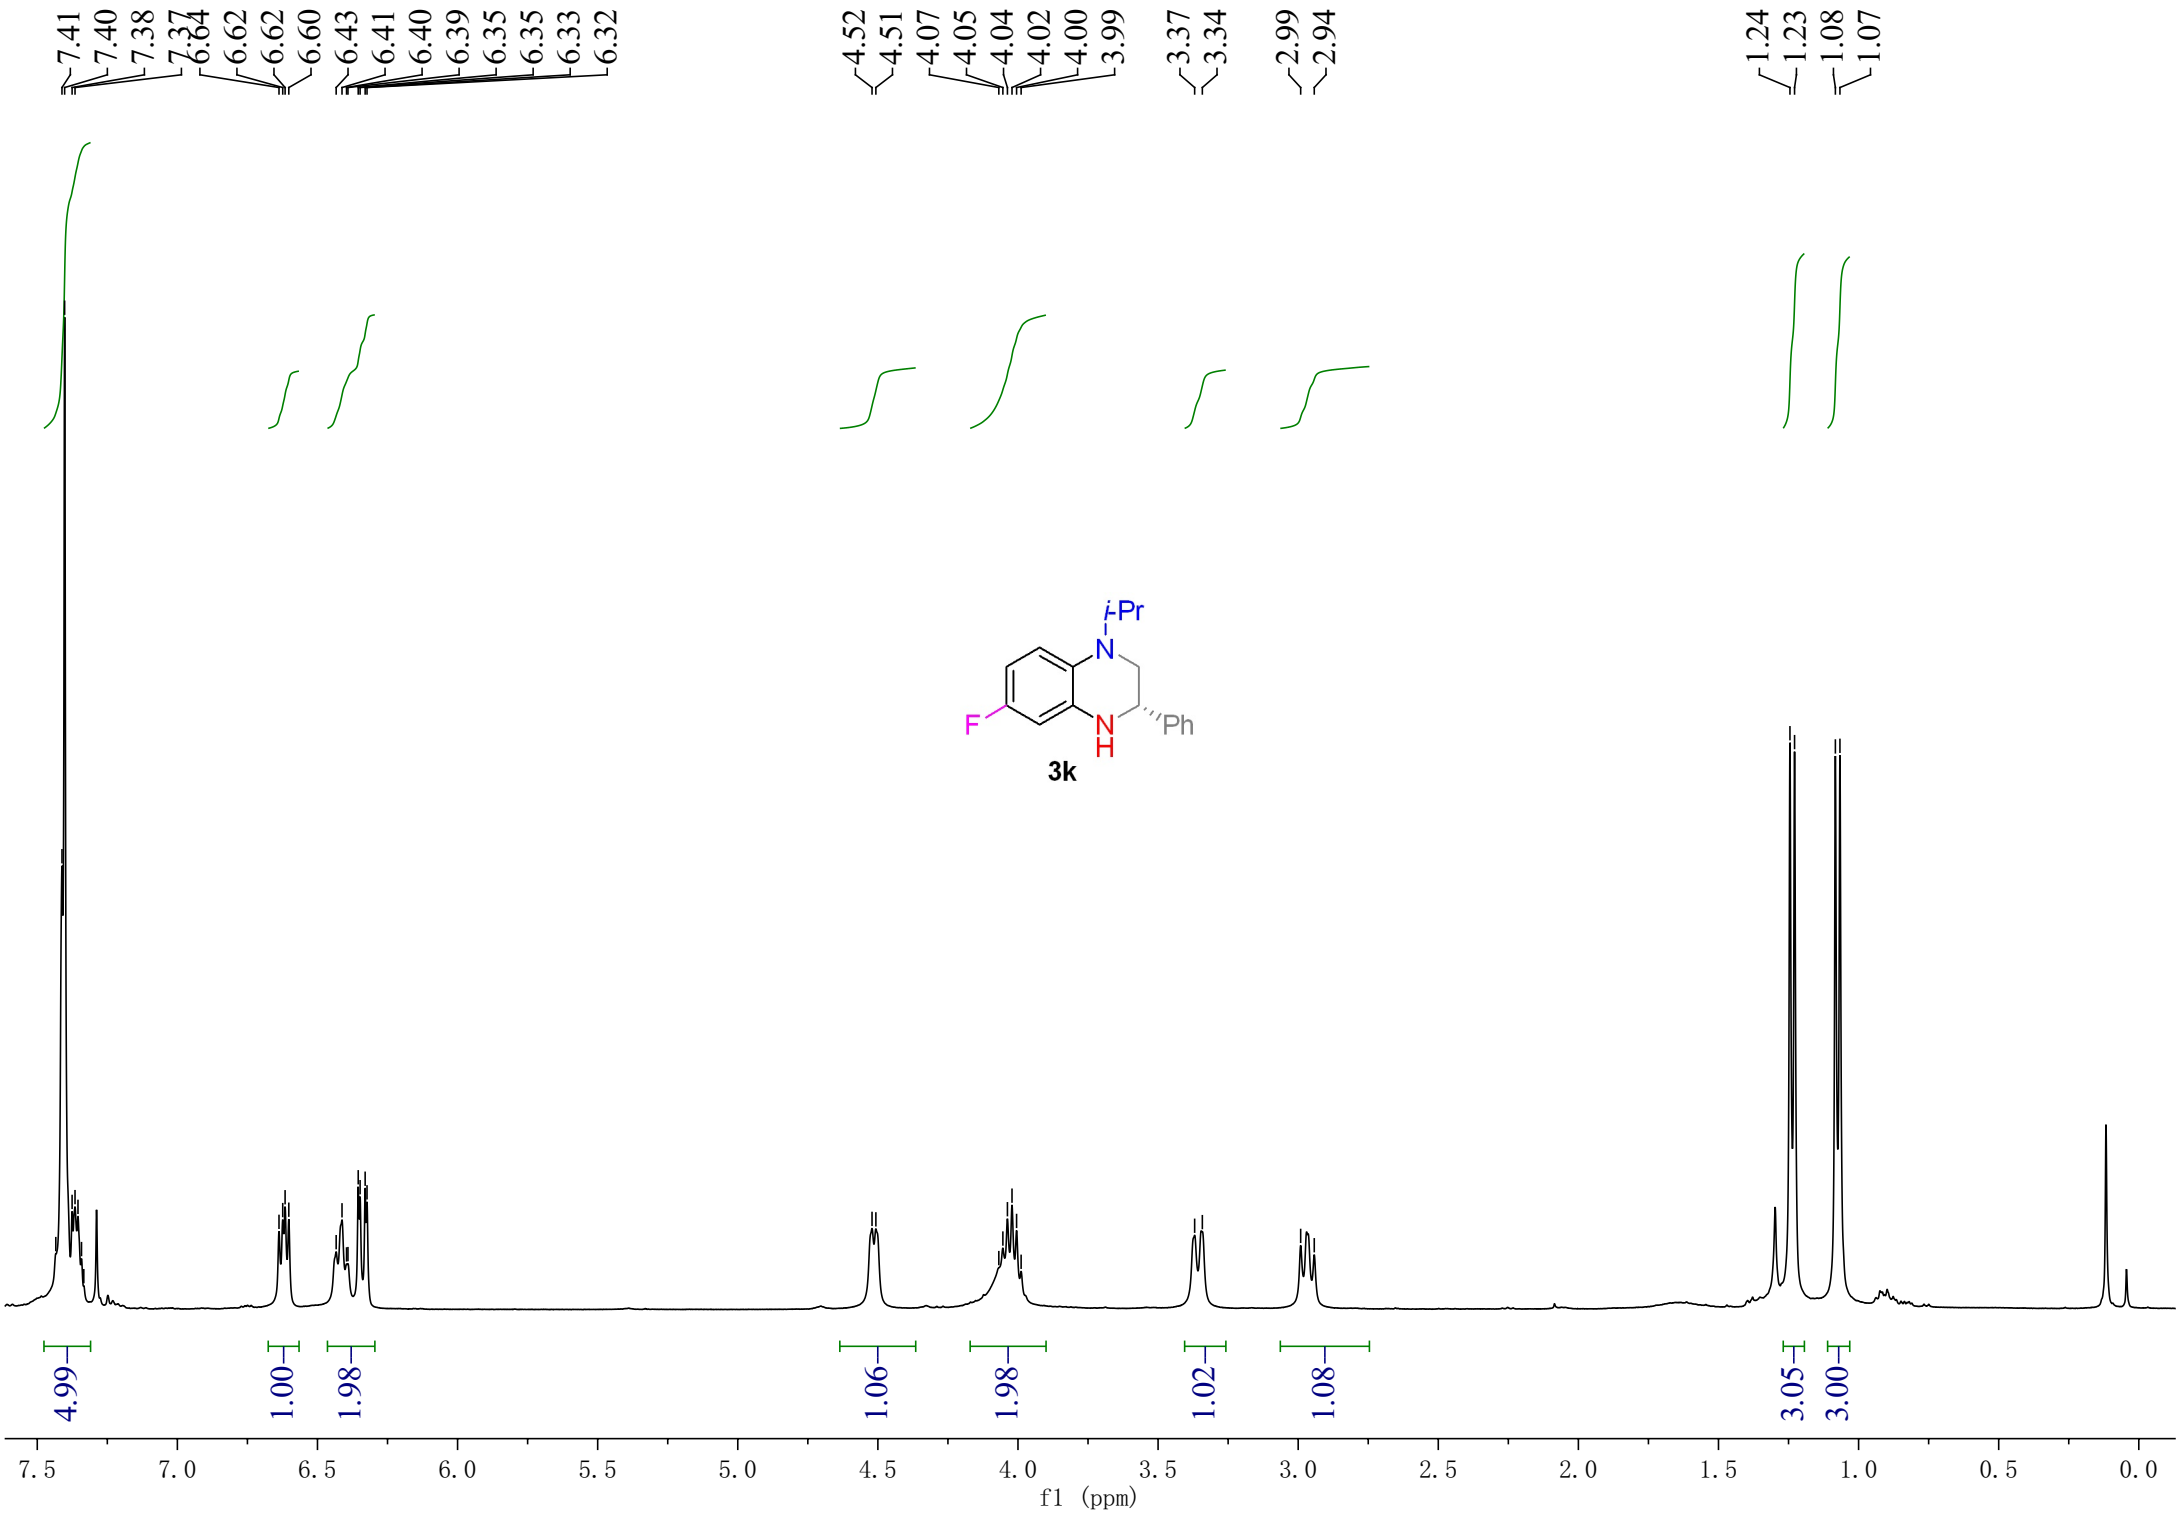

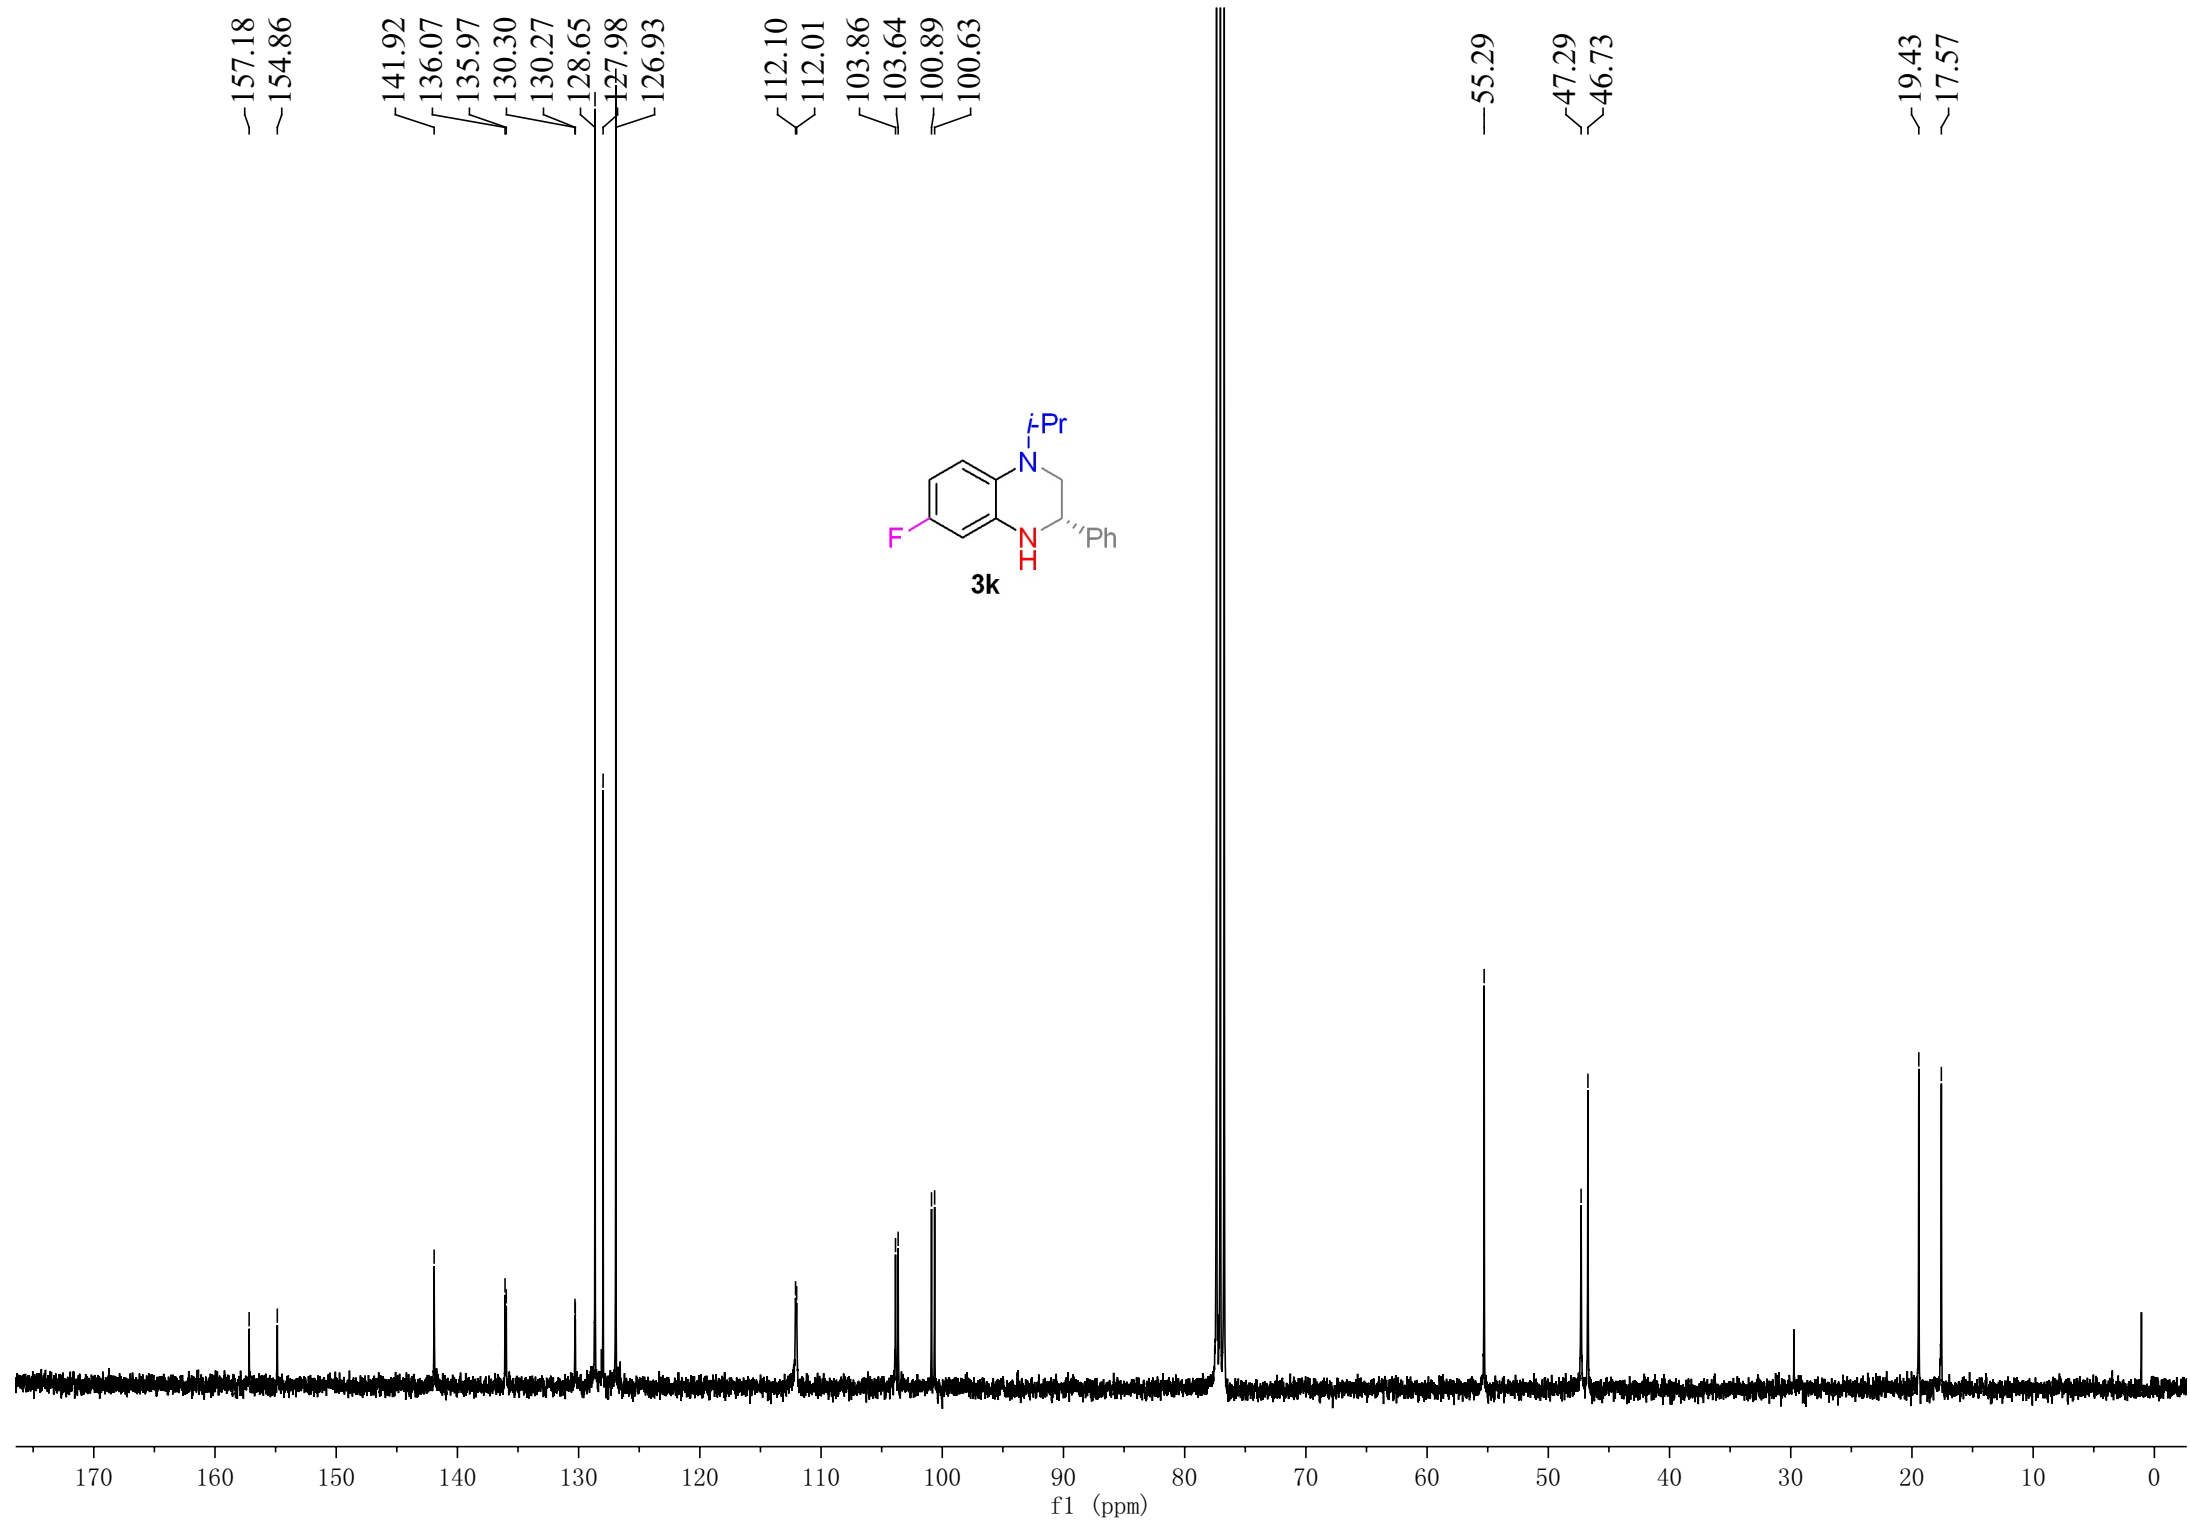



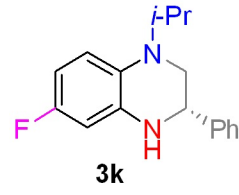

— 127.28

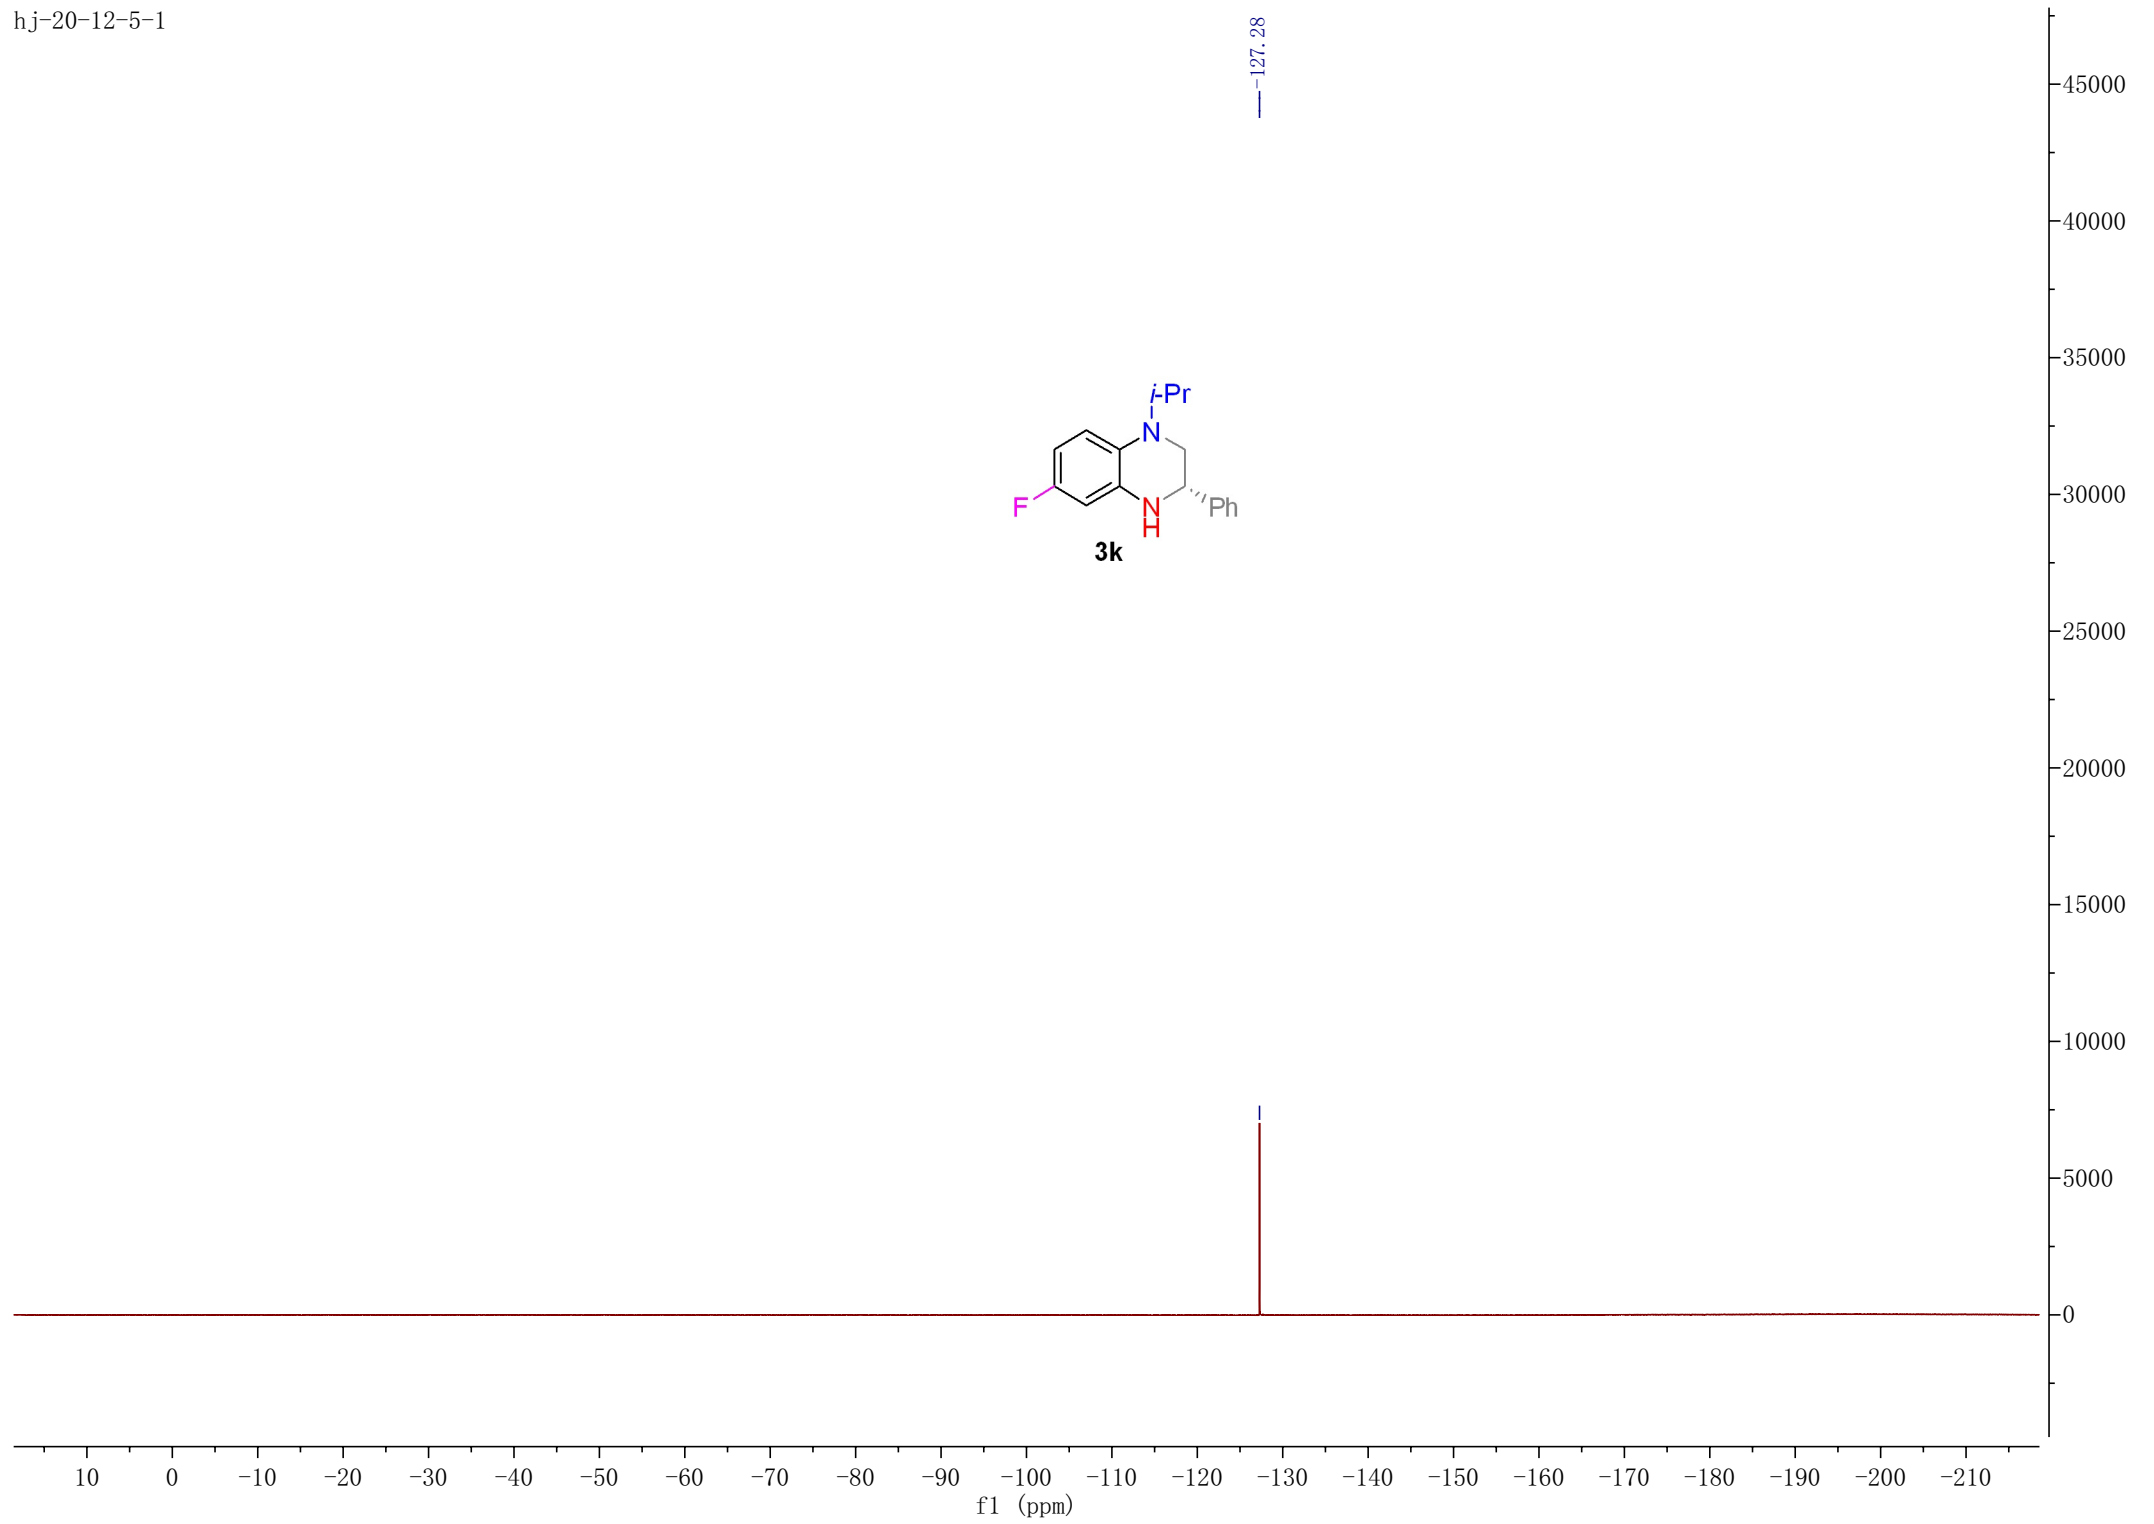

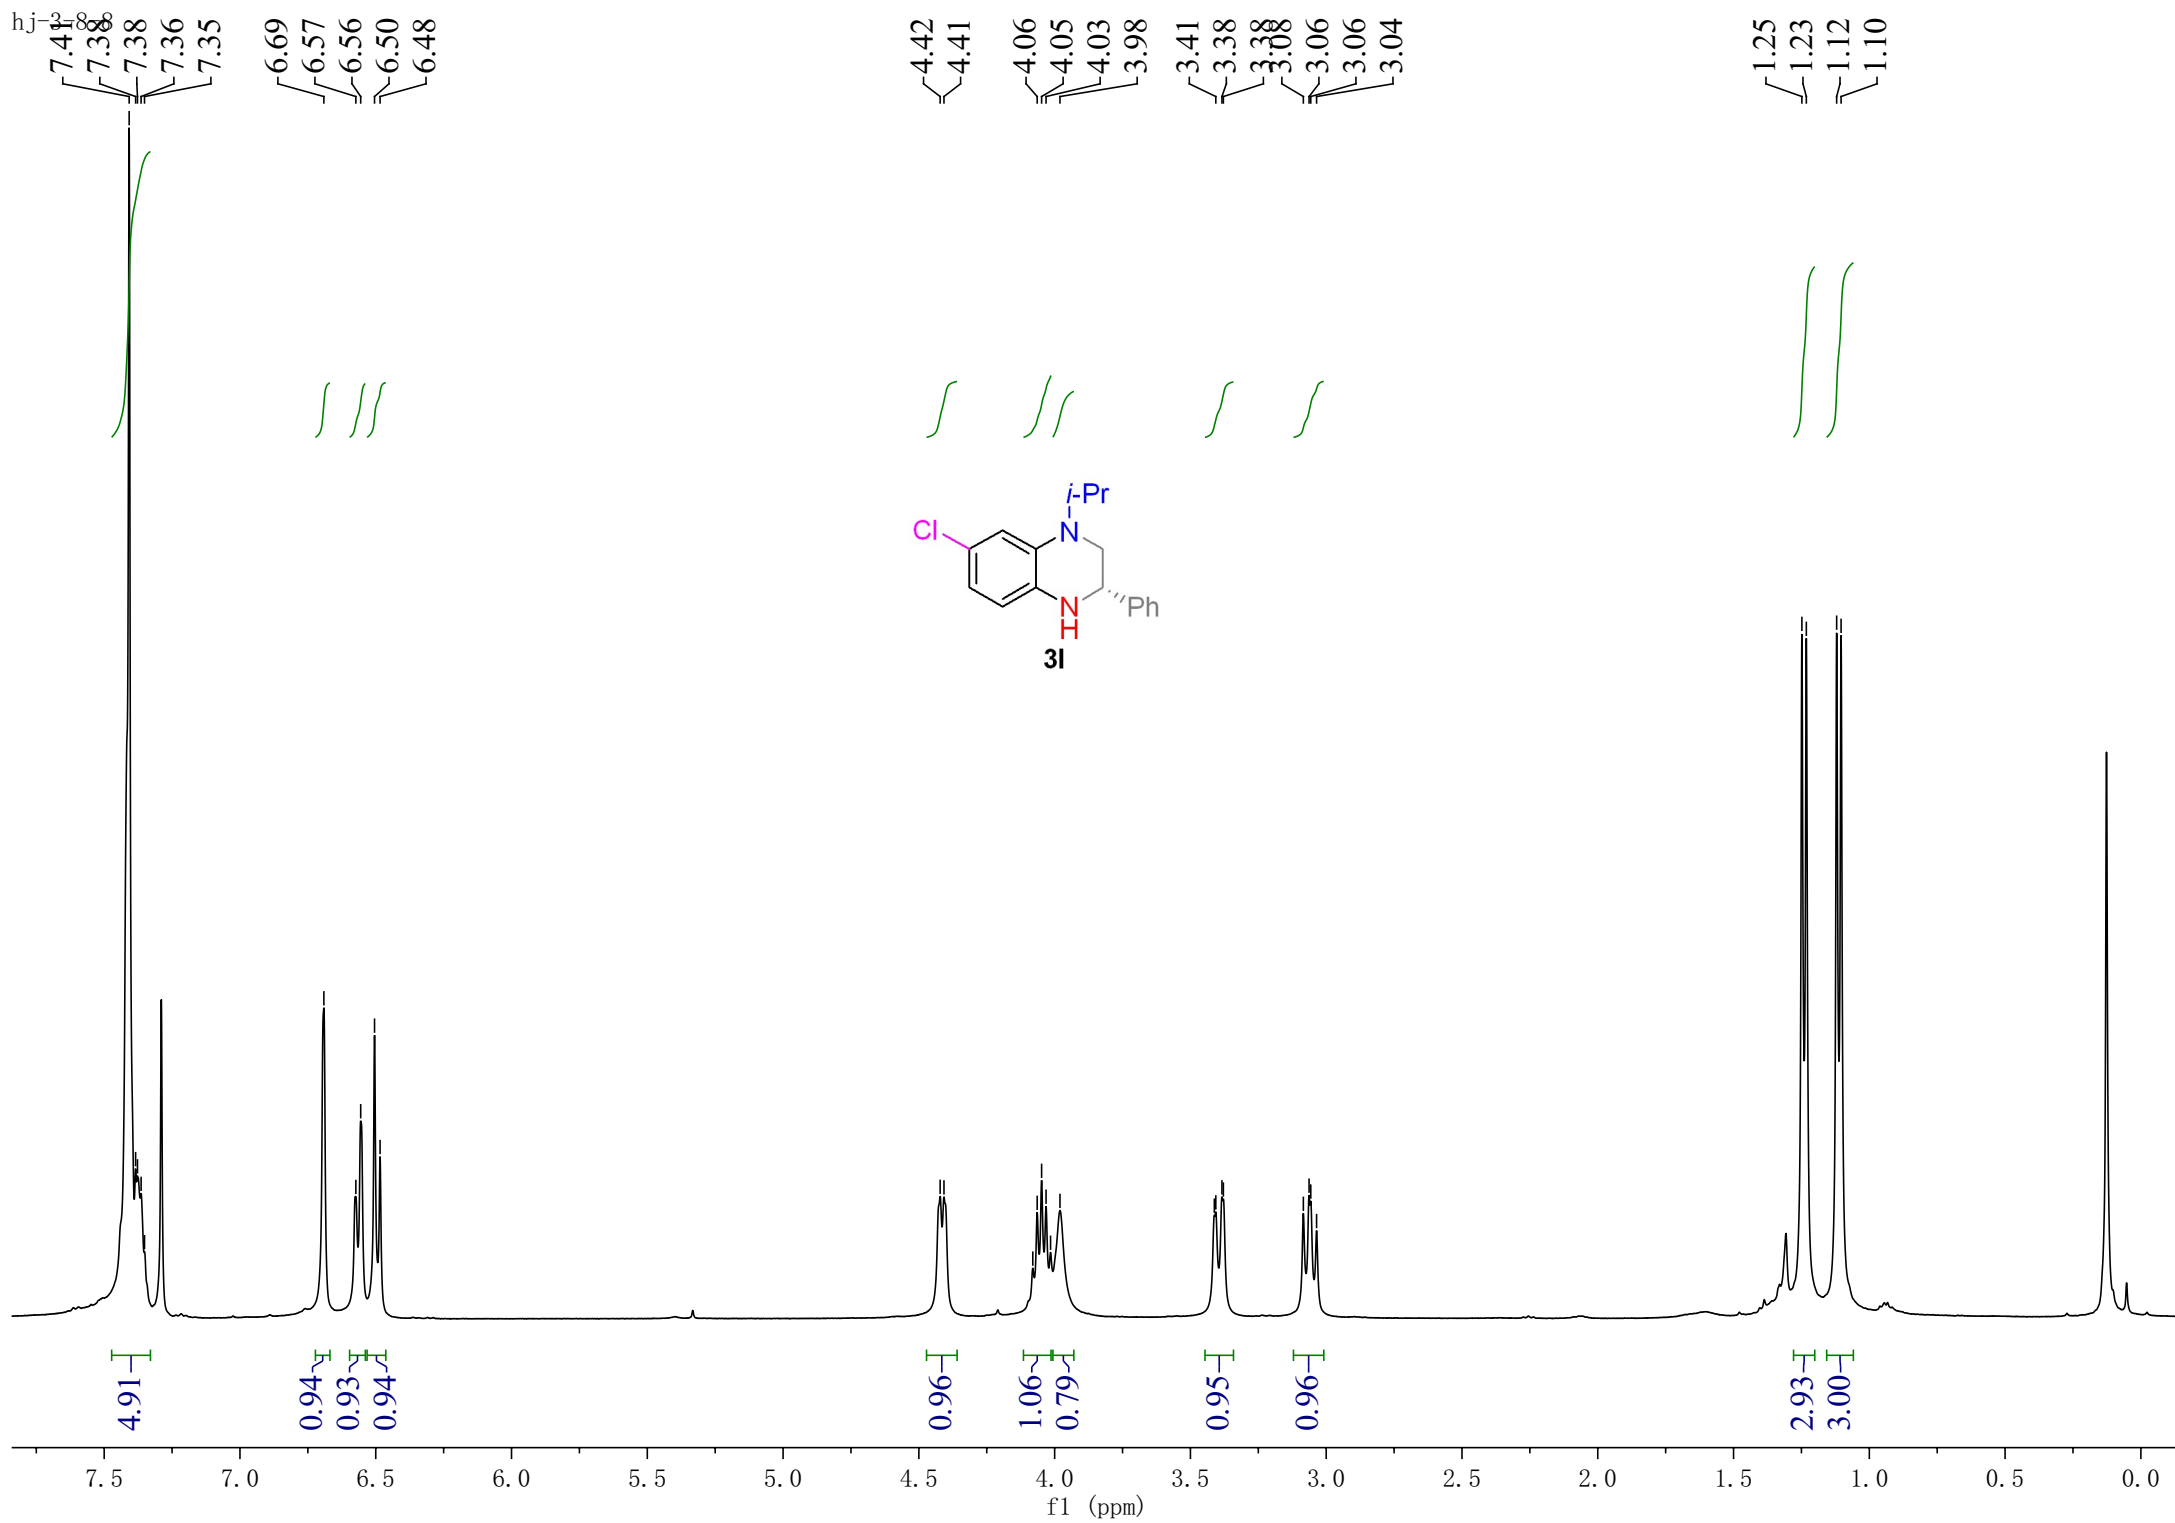

hj-3-8-8

—141.80  
/135.27  
—133.25  
/128.68  
/128.04  
/127.01  
~123.74

—116.37  
~114.31  
—111.03

—54.72  
/46.97  
/46.68

~19.18  
~18.07

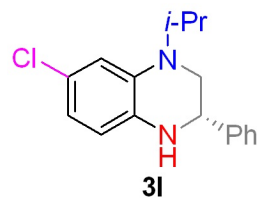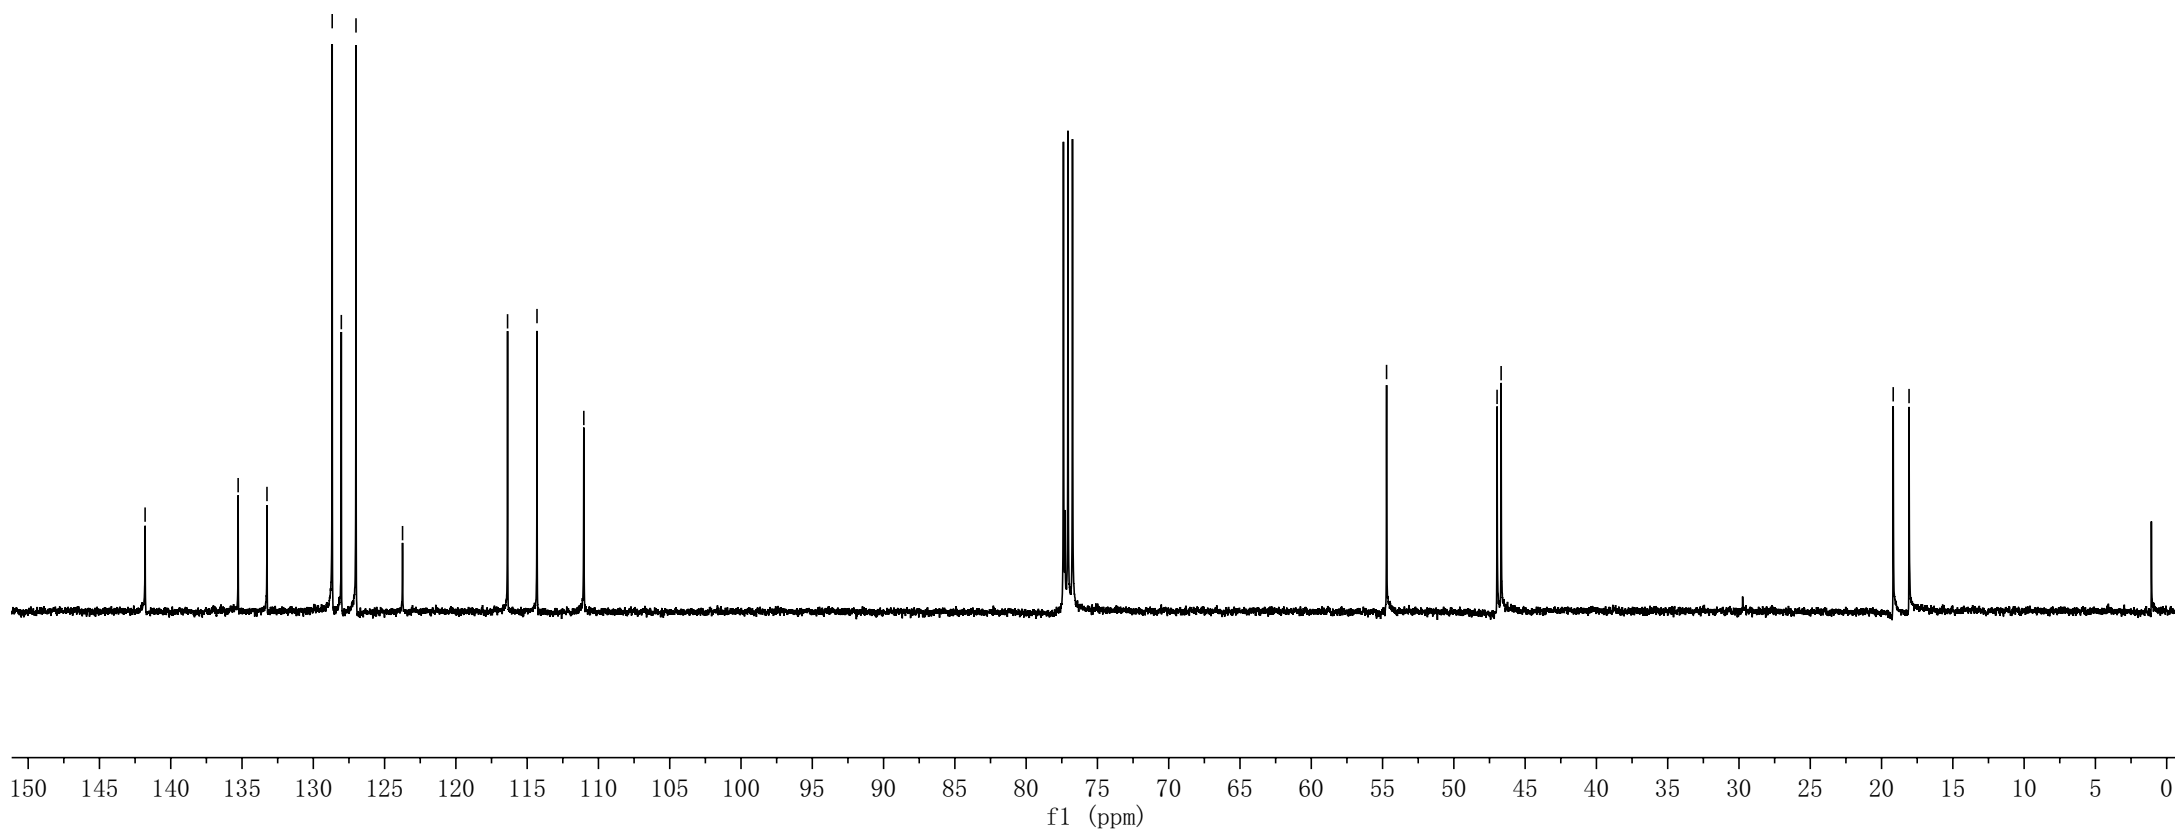

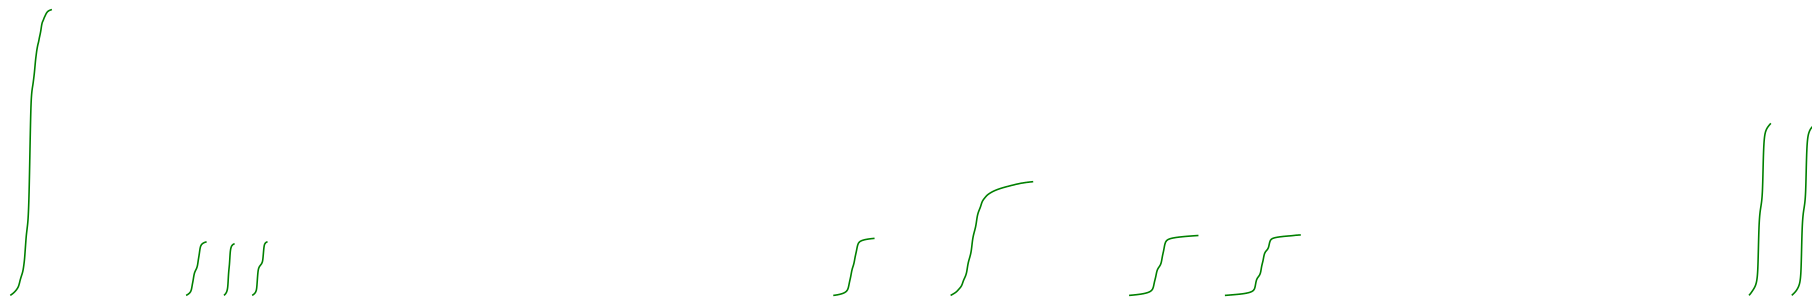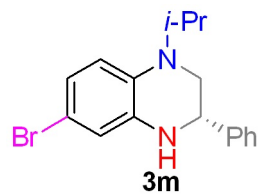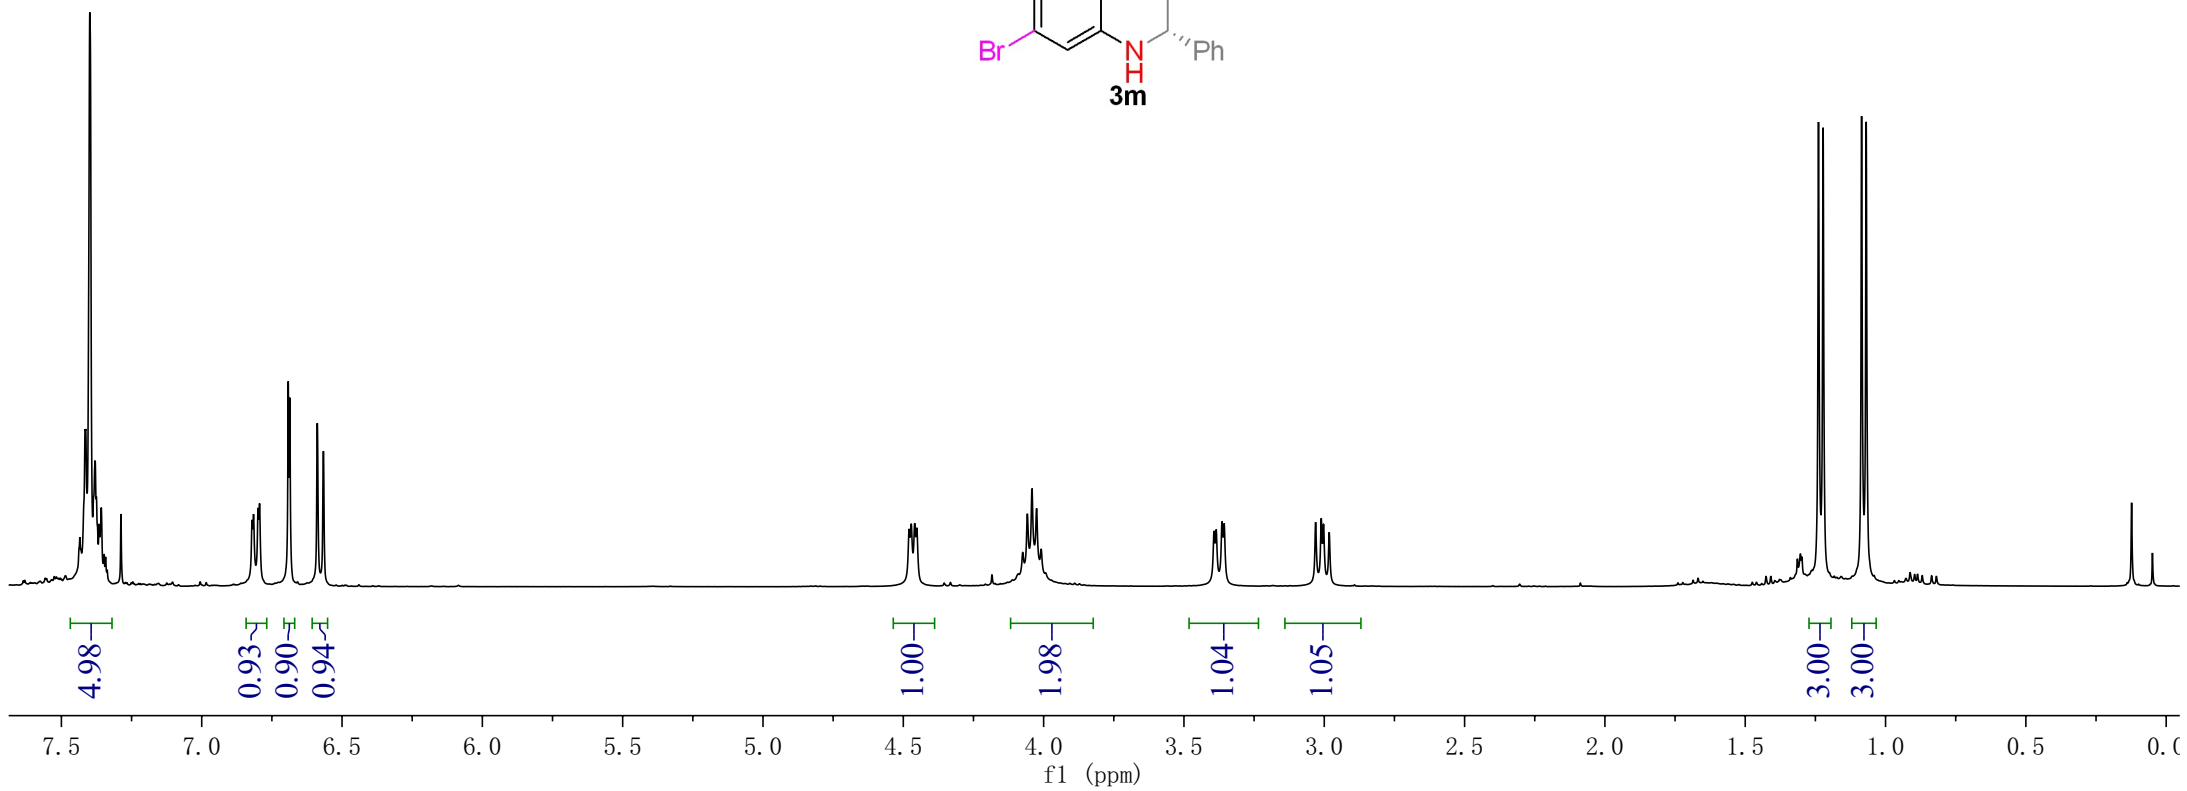

—141.79  
~136.27  
~133.33  
~128.69  
~128.04  
~126.95

~121.03  
~116.02  
~112.61  
~108.97

—54.90

~46.97  
~46.59

~19.25  
~17.81

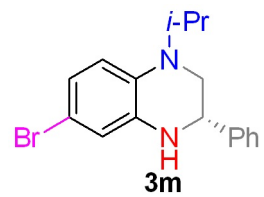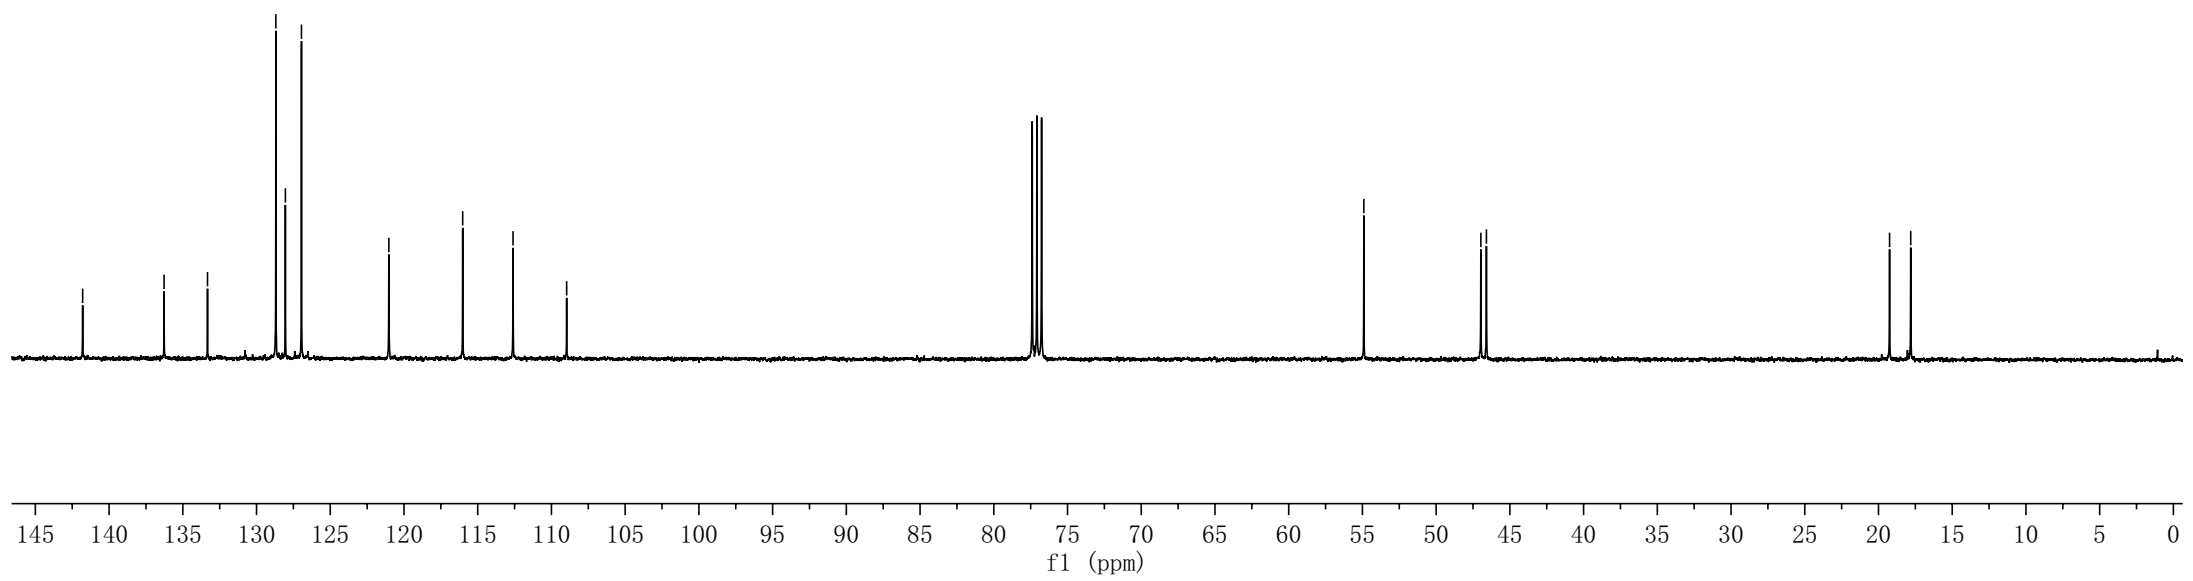

7.41  
7.40  
7.38  
7.36  
6.98  
6.85  
6.49  
6.47

4.46  
4.45  
4.44  
4.43  
4.06  
4.04  
4.02  
4.01  
3.39  
3.37  
3.36  
3.04  
3.02  
3.01  
2.99

1.23  
1.22  
1.08  
1.07

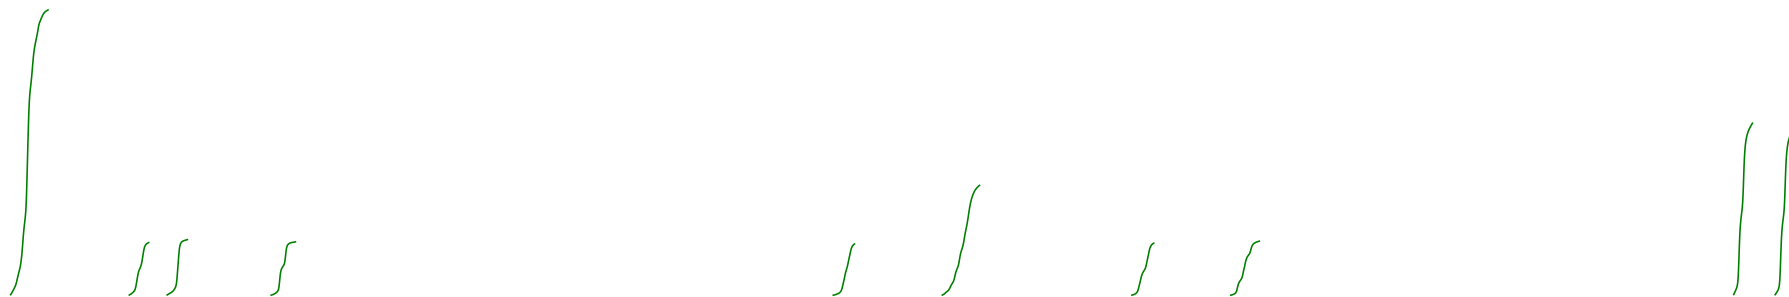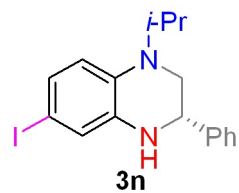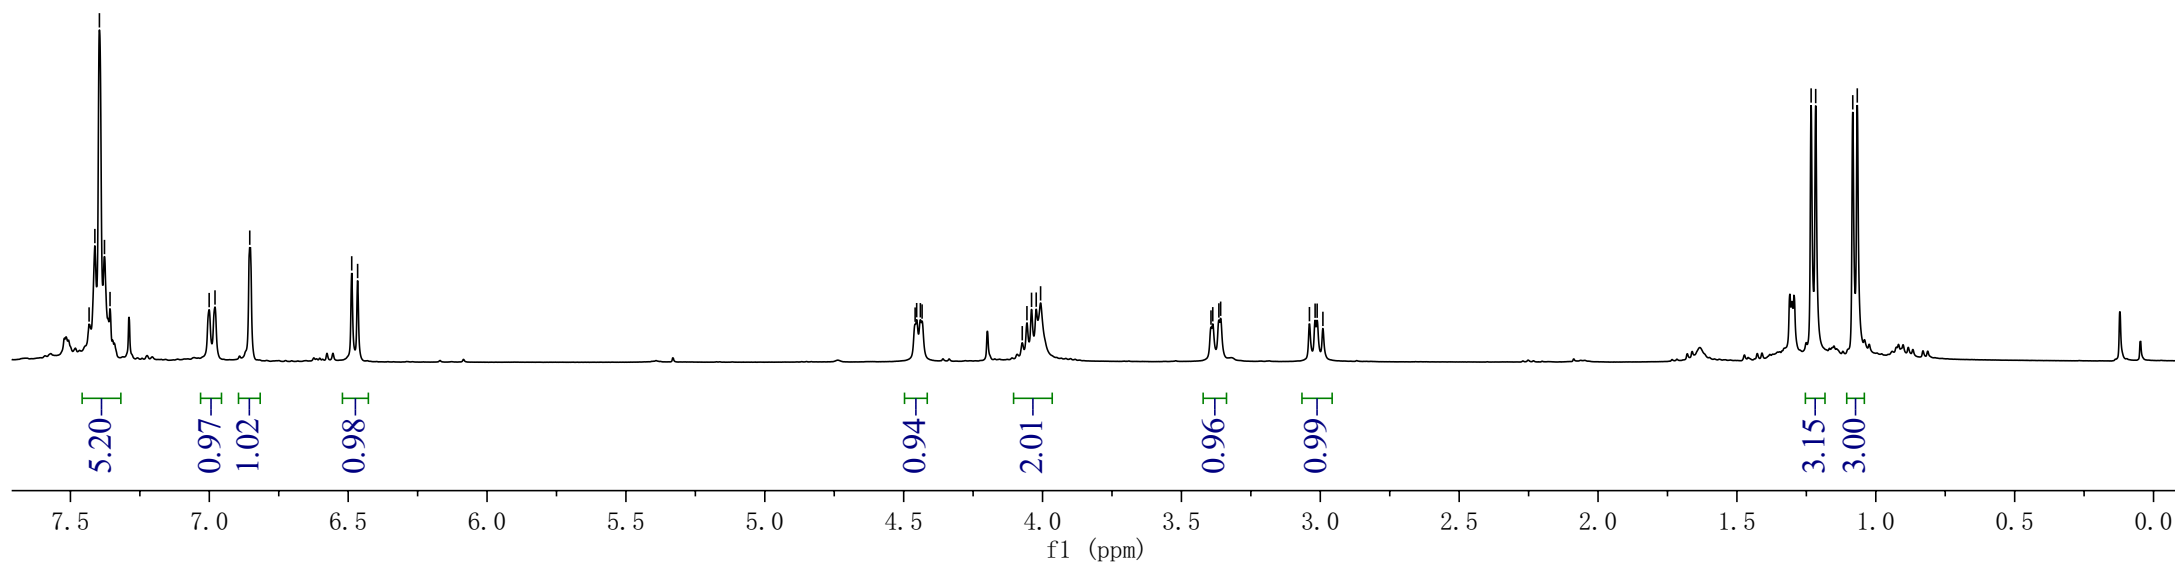

141.74  
136.60  
134.05  
130.78  
128.69  
128.05  
127.31  
126.95  
126.46  
121.64  
113.18  
113.03

54.77

46.84  
46.59

19.23  
18.02  
17.86

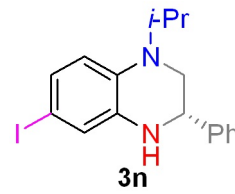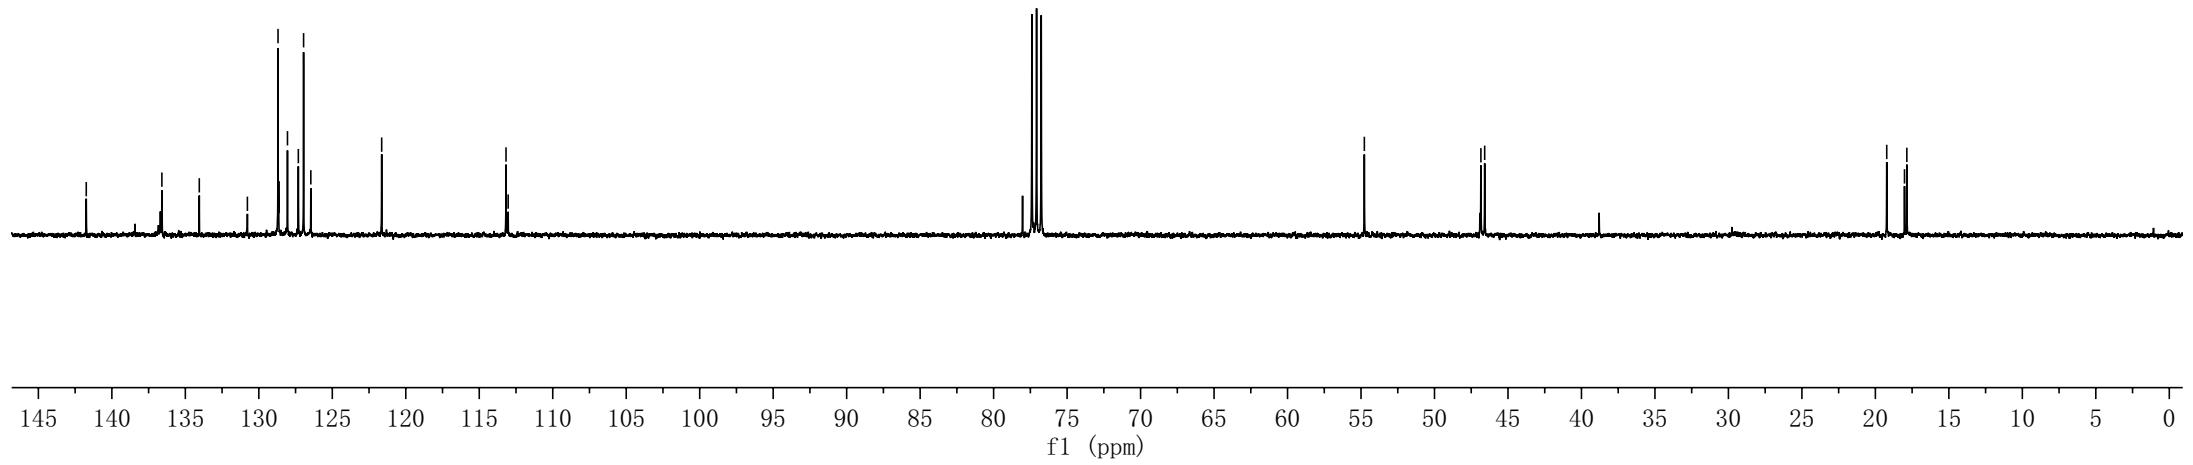

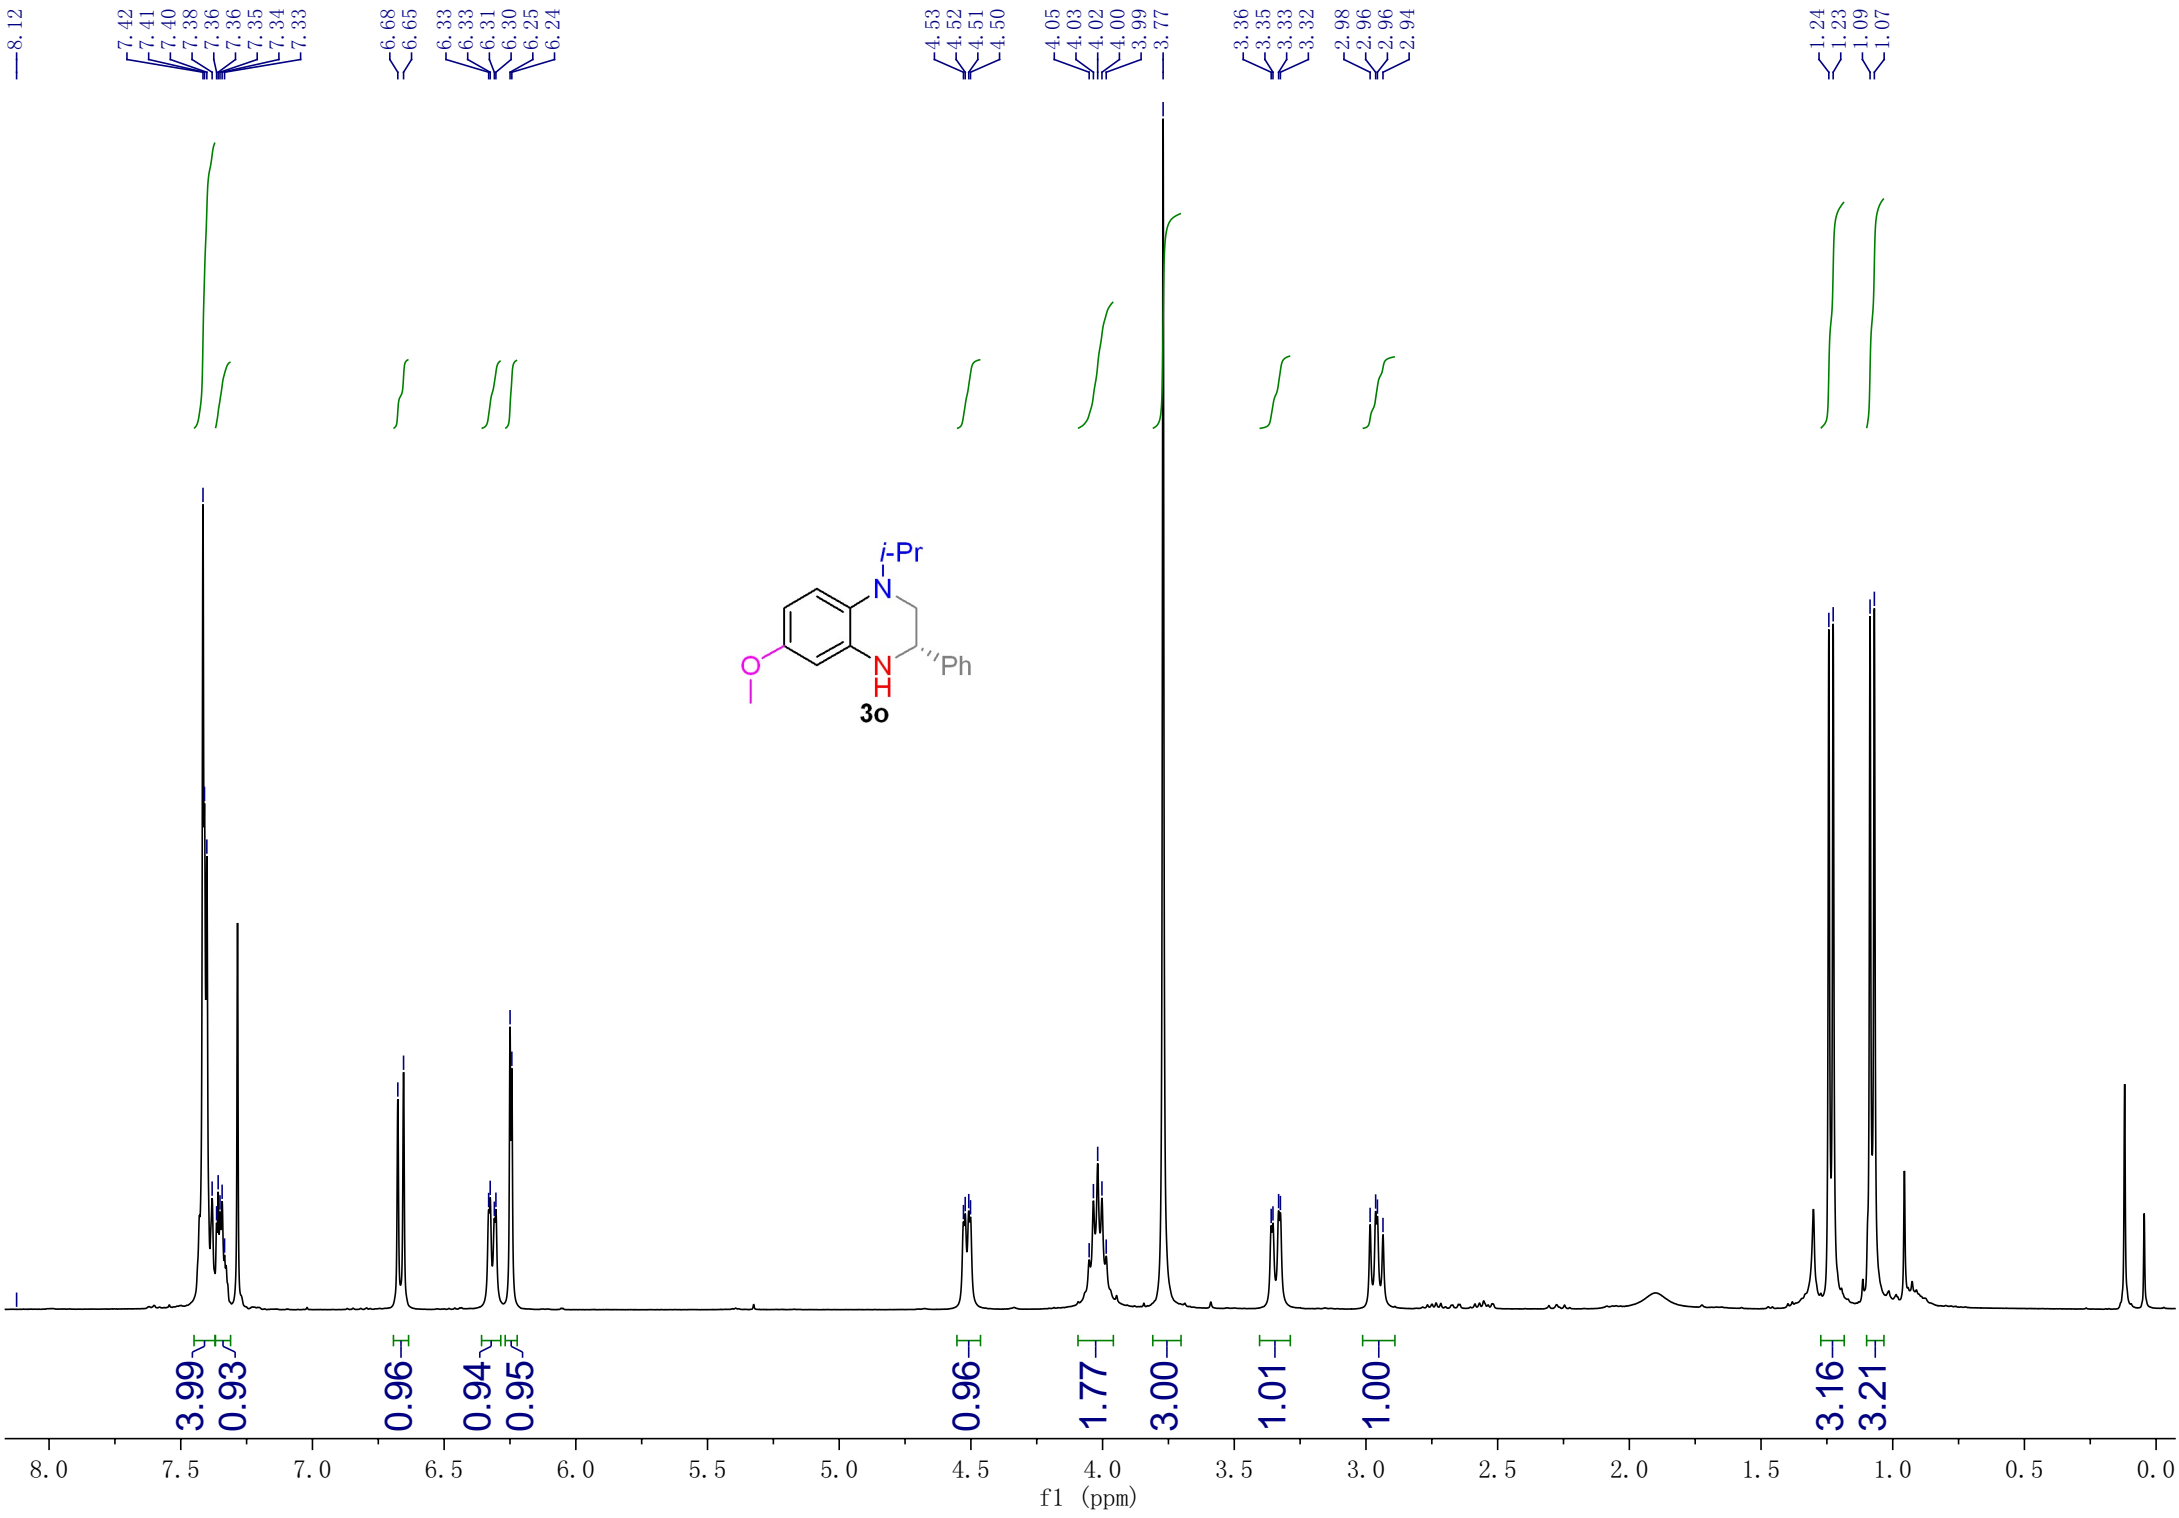

8.12

7.42  
7.41  
7.40  
7.38  
7.36  
7.35  
7.34  
7.33

6.68  
6.65  
6.33  
6.33  
6.31  
6.30  
6.25  
6.24

4.53  
4.52  
4.51  
4.50

4.05  
4.03  
4.02  
4.00  
3.99  
3.77

3.36  
3.35  
3.33  
3.32

2.98  
2.96  
2.96  
2.94

1.24  
1.23  
1.09  
1.07

3.99  
0.93

0.96

0.94  
0.95

0.96

1.77

3.00

1.01

1.00

3.16  
3.21

8.0 7.5 7.0 6.5 6.0 5.5 5.0 4.5 4.0 3.5 3.0 2.5 2.0 1.5 1.0 0.5 0.0

f1 (ppm)



hj-20-9-28-2

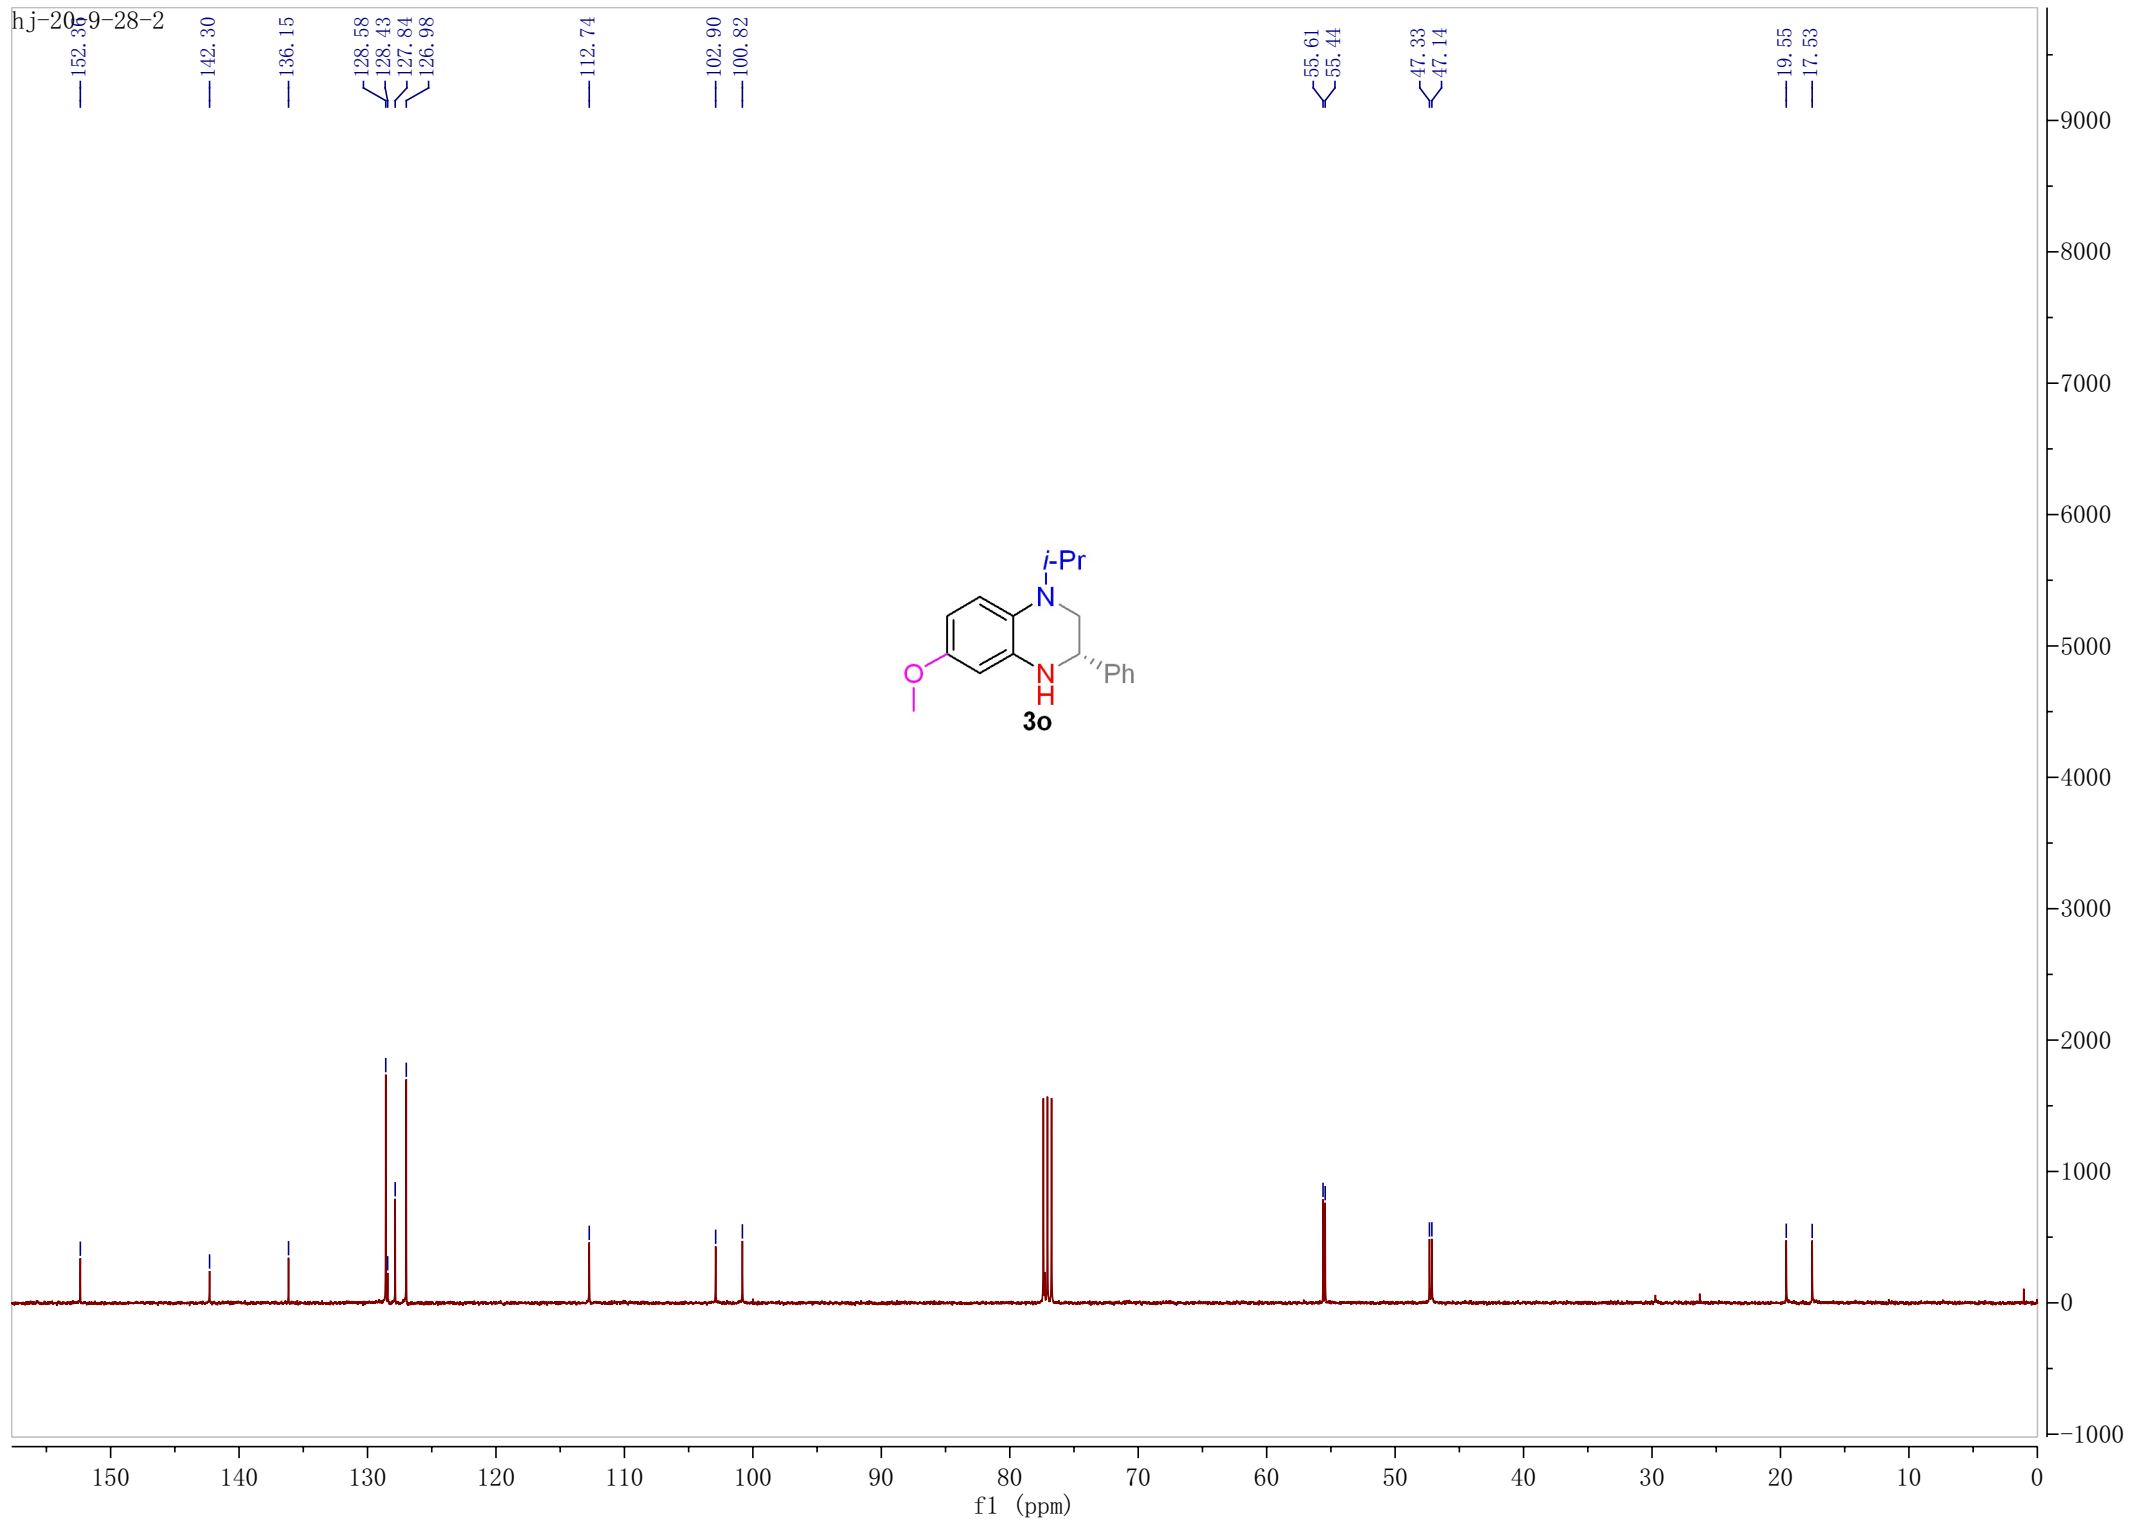

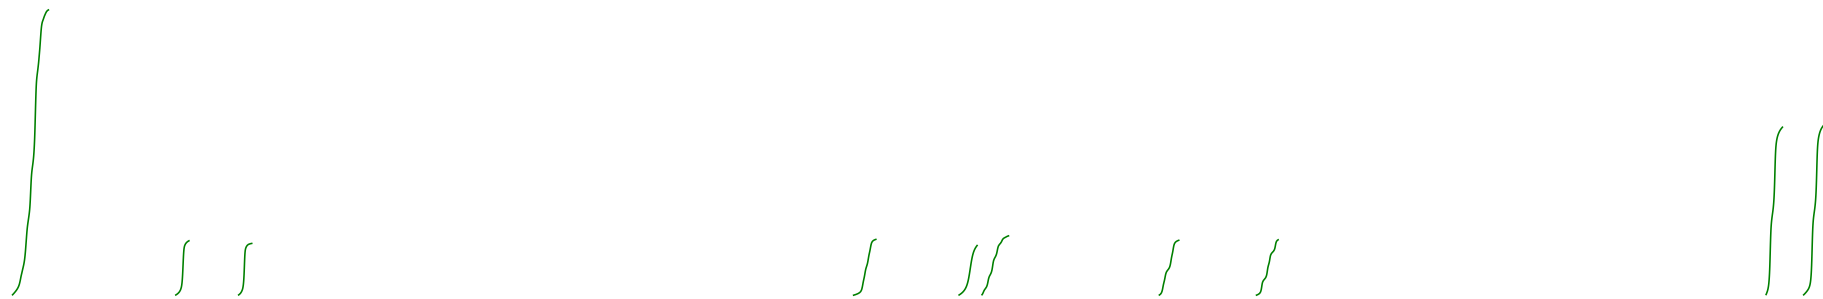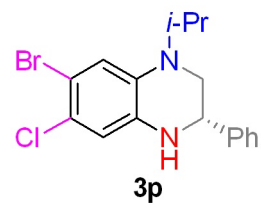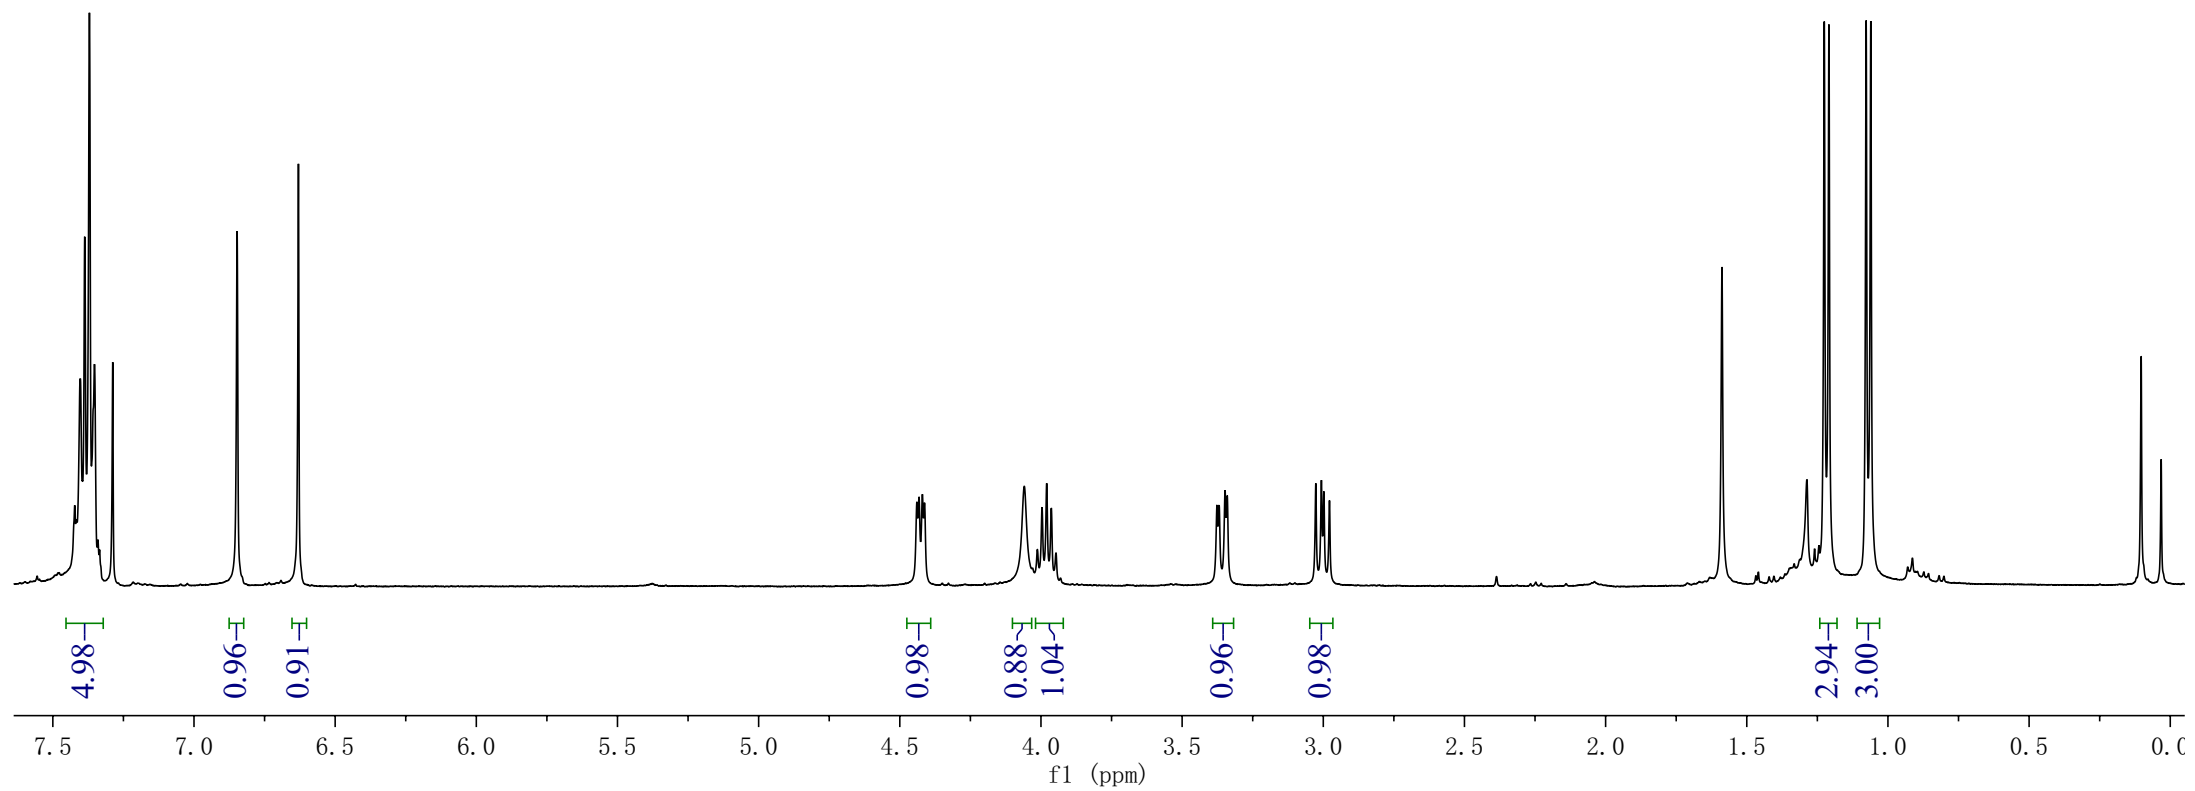

hjt-9-6

— 141.38  
~ 135.12  
~ 134.16  
~ 128.72  
~ 128.15  
~ 126.87  
— 121.09  
~ 115.02  
~ 113.98  
~ 109.65

— 54.67

~ 47.15  
~ 46.24

~ 19.10  
~ 17.90

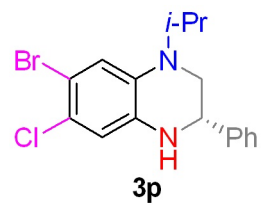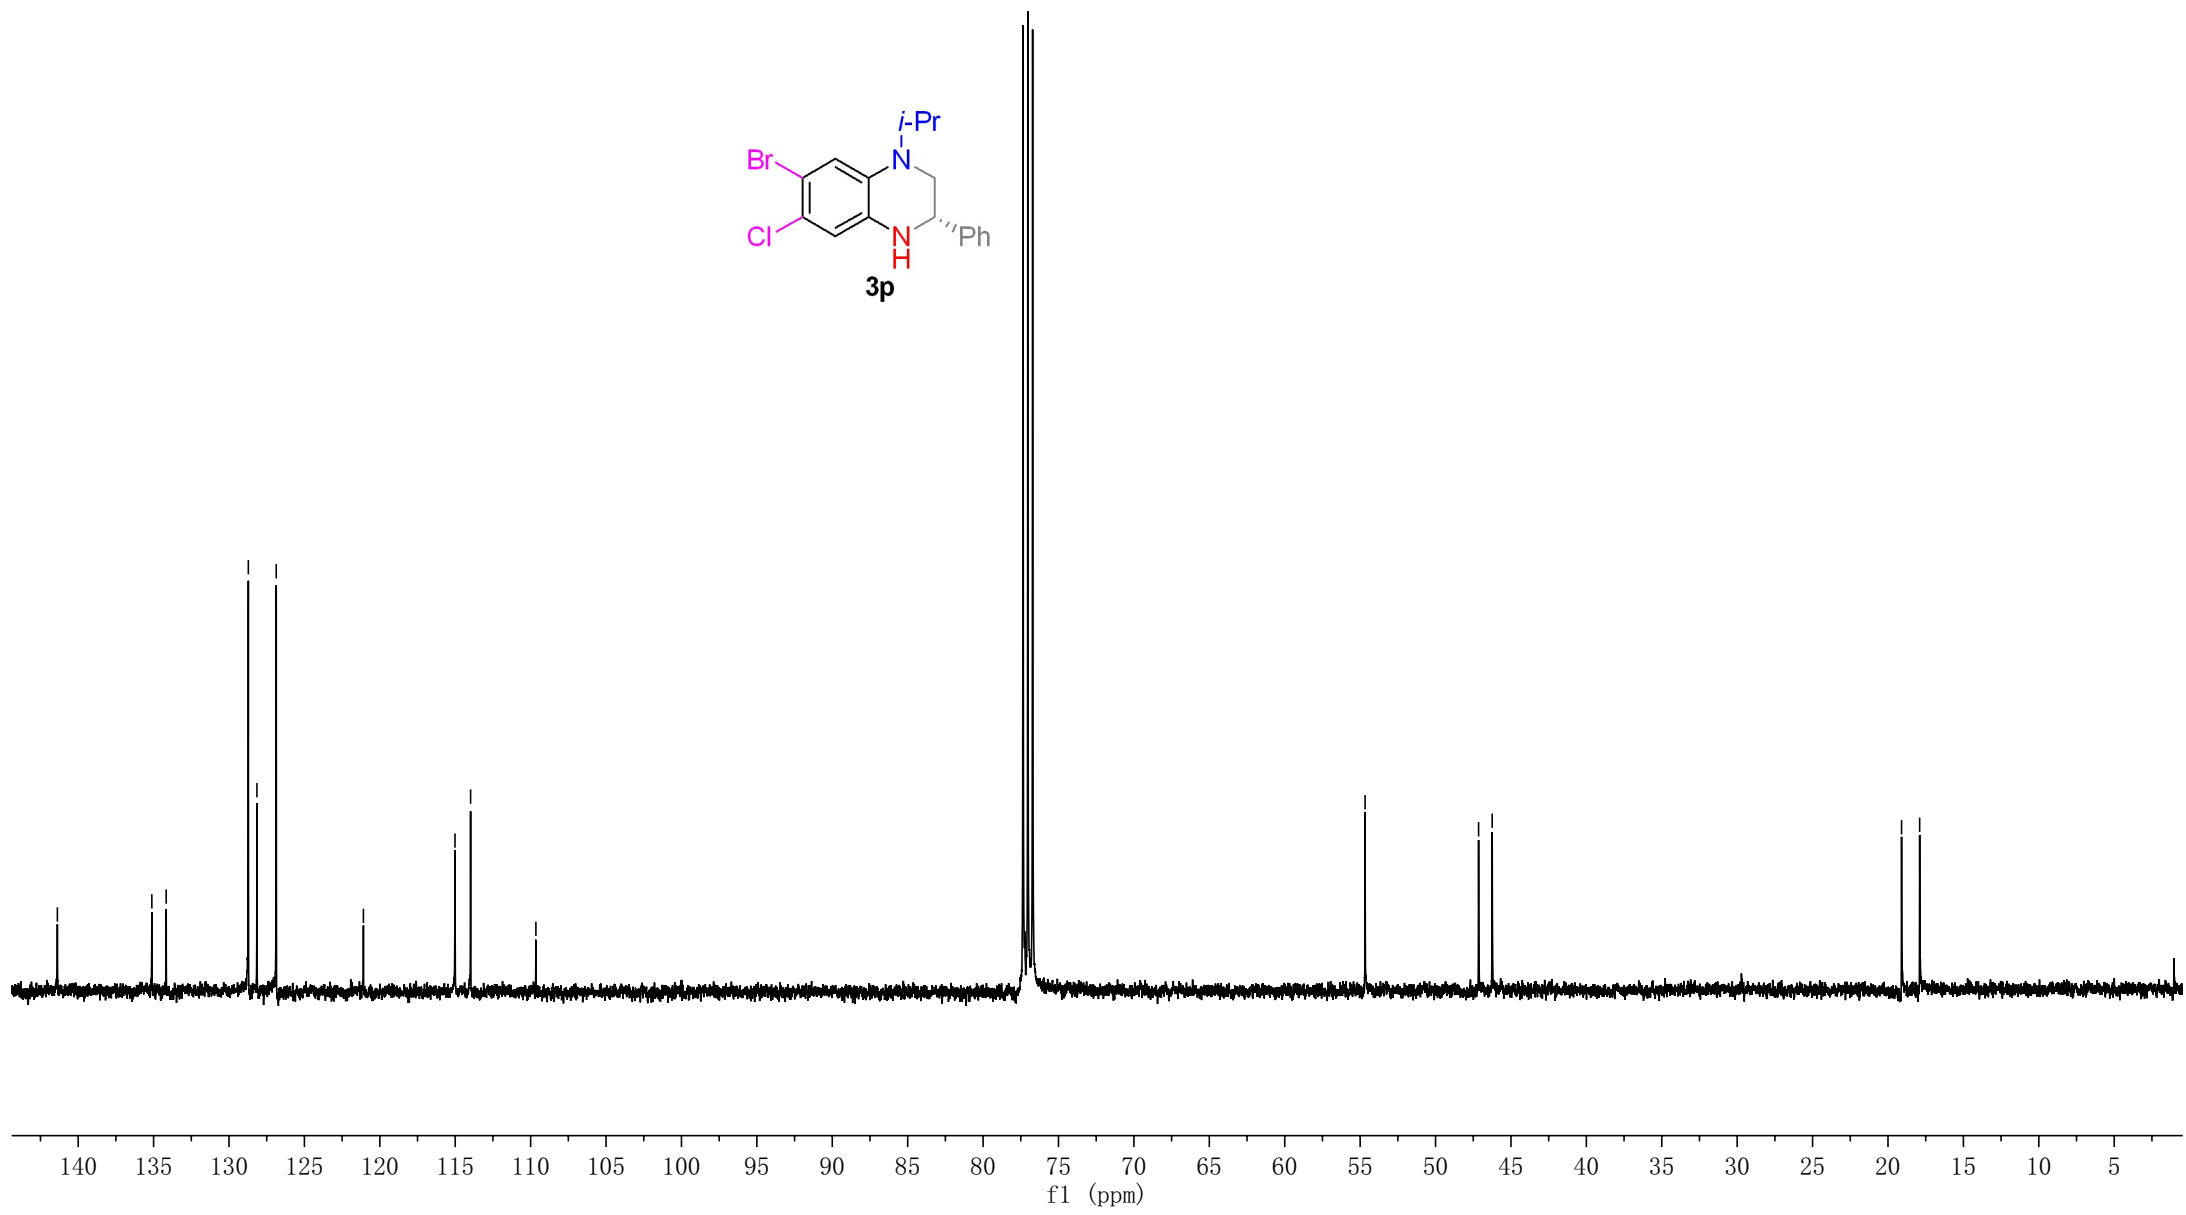

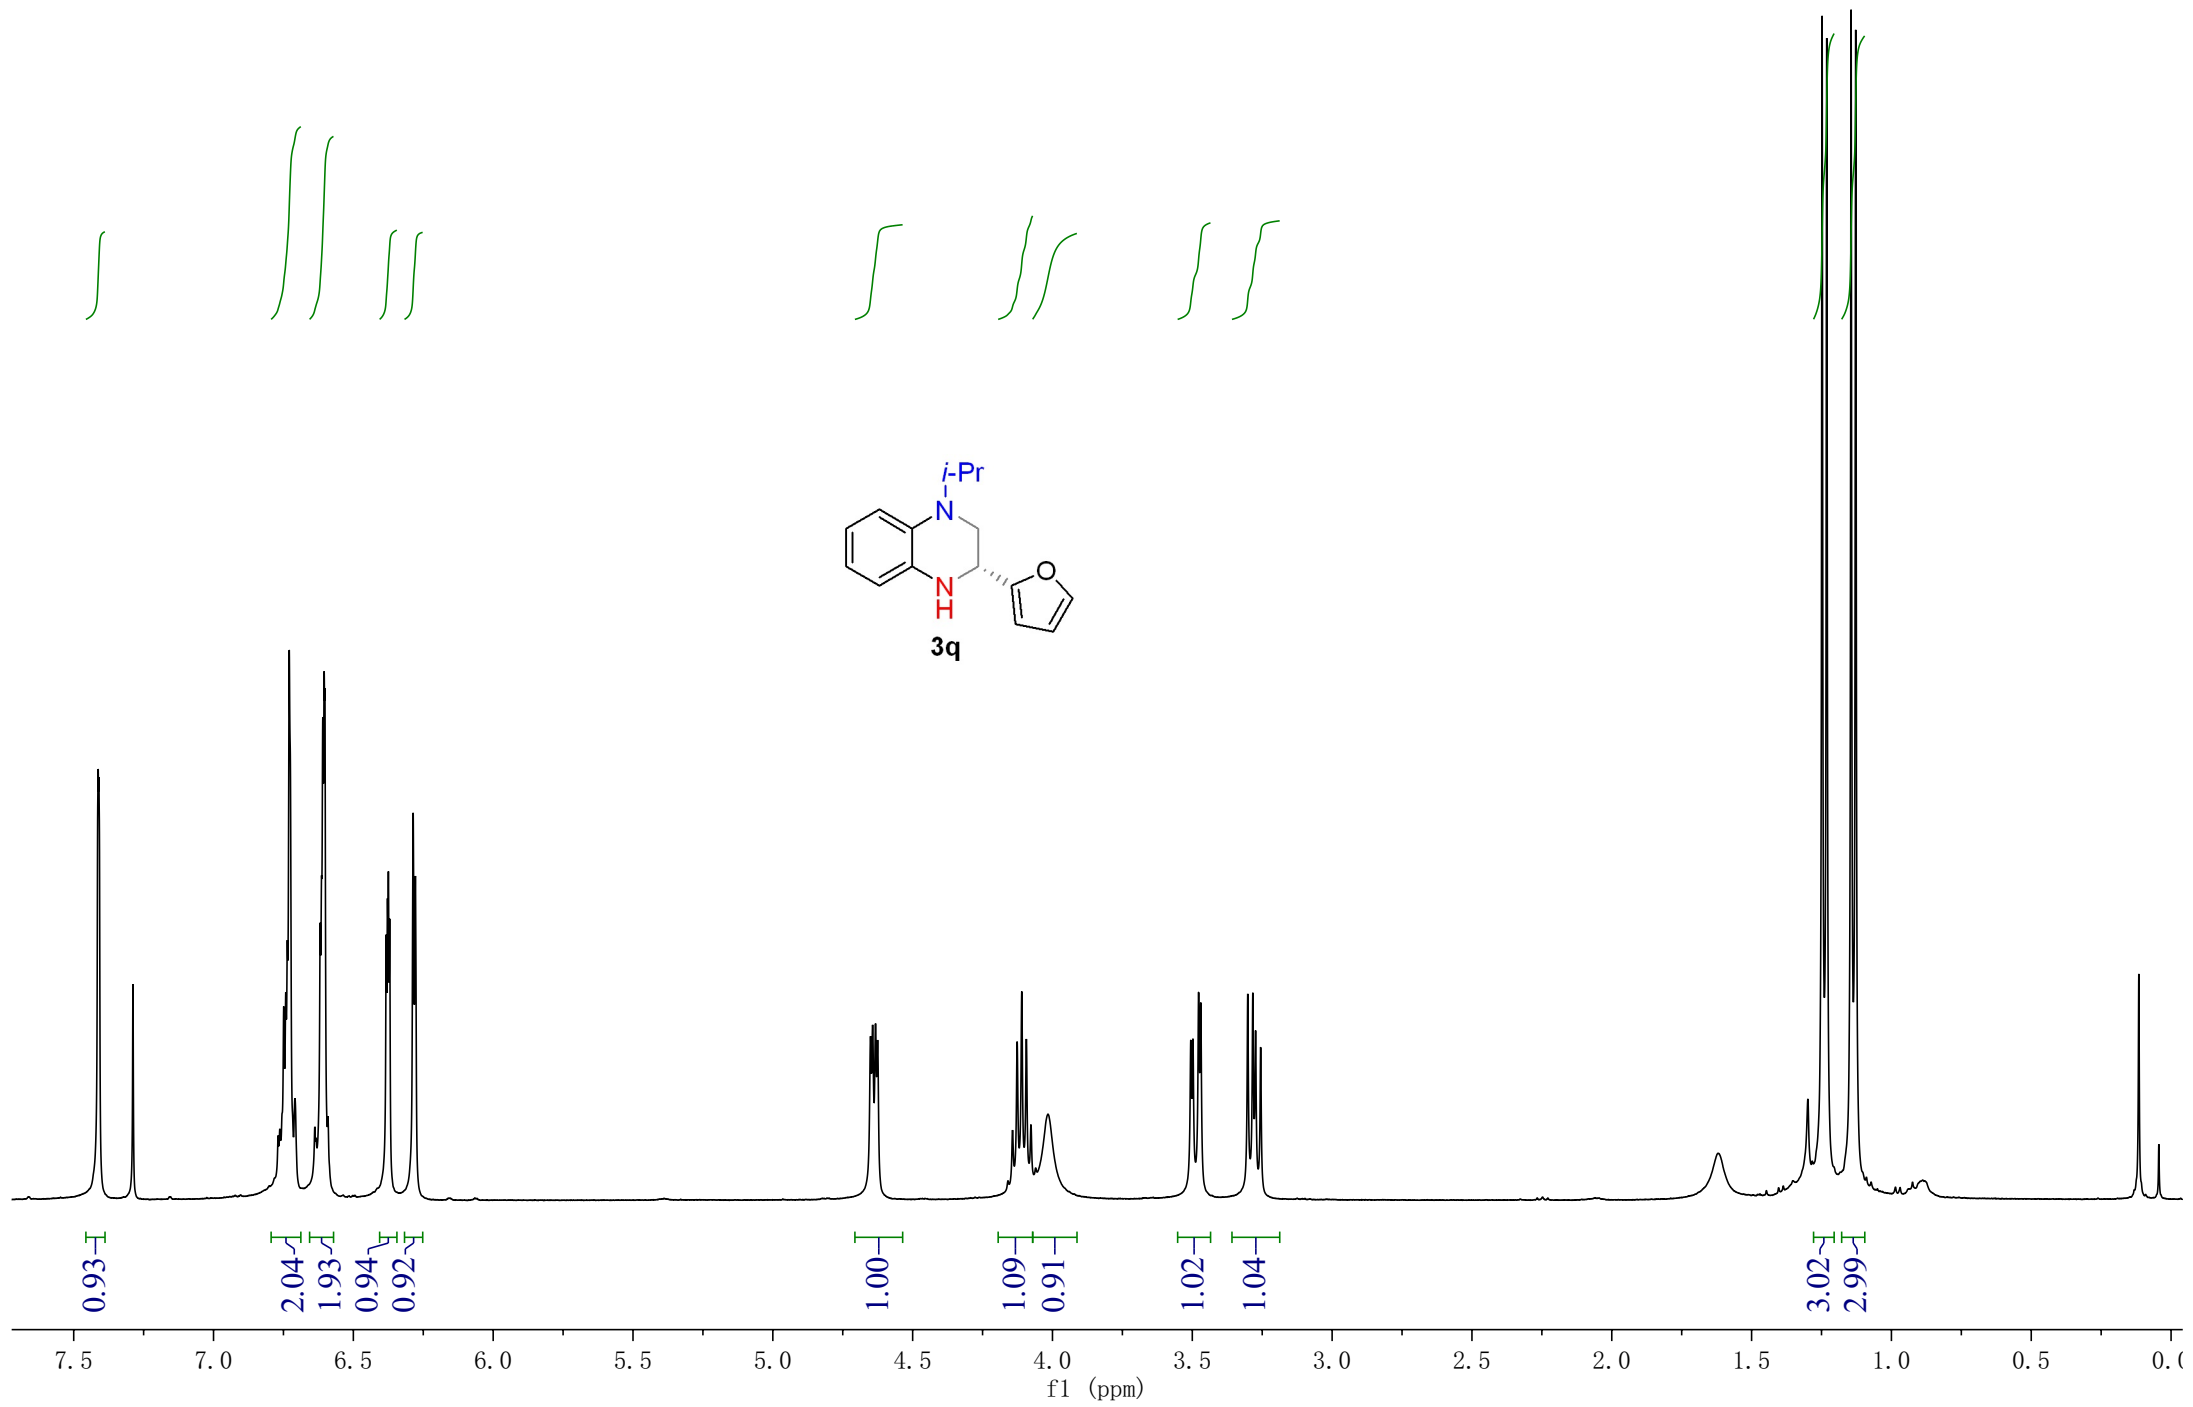

—155.26

—141.70

~134.40

~133.57

~119.29

~117.39

~114.42

~111.47

~110.38

~105.91

—49.22

~46.72

—43.50

~19.07

~18.27

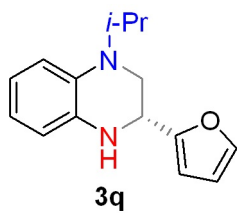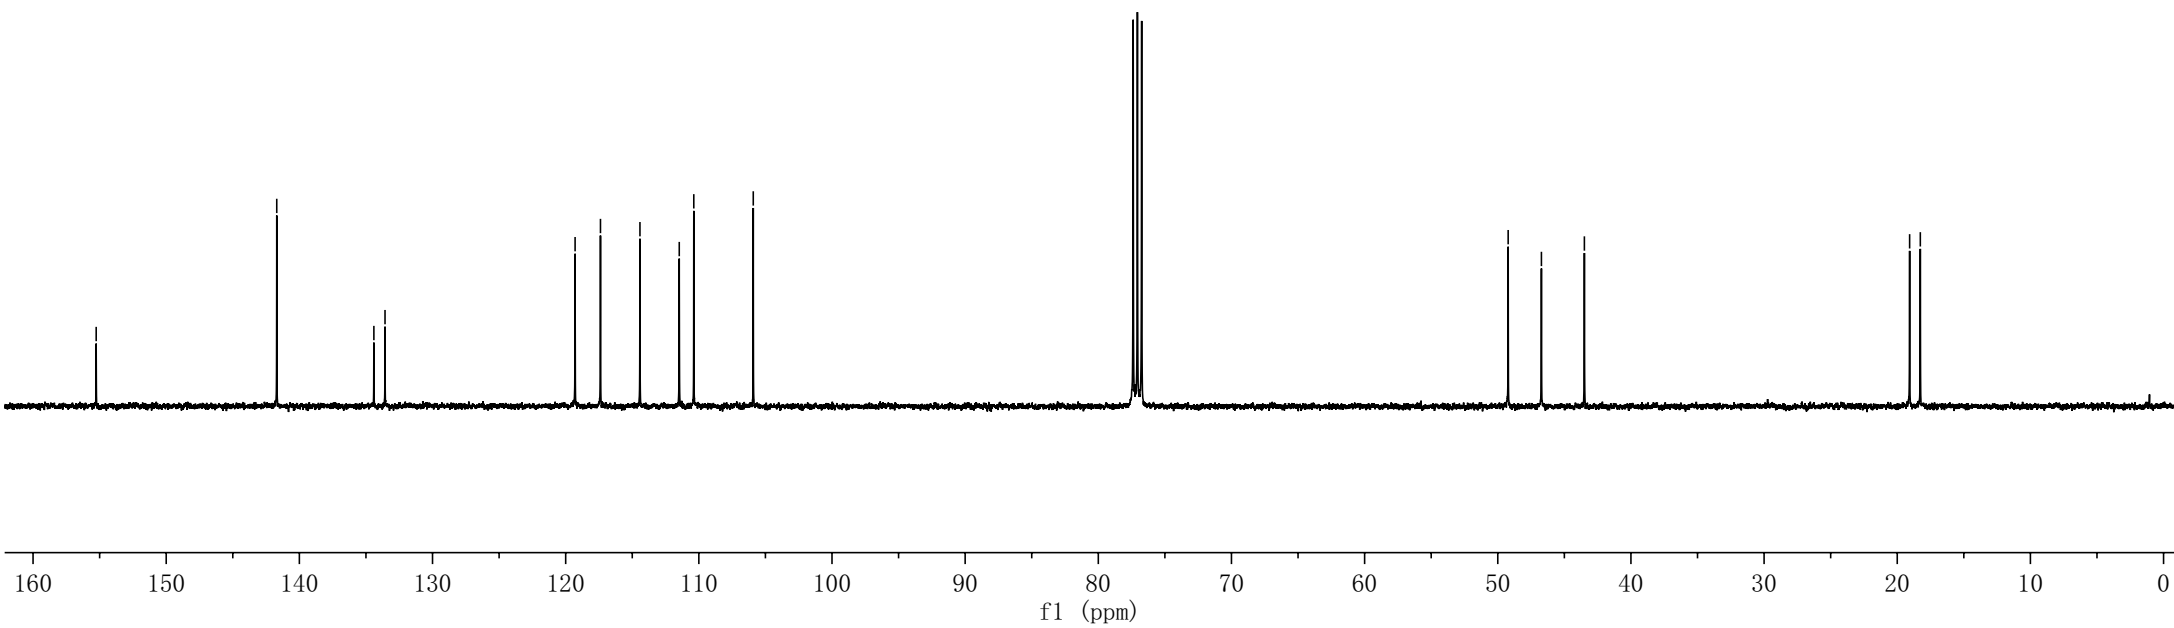

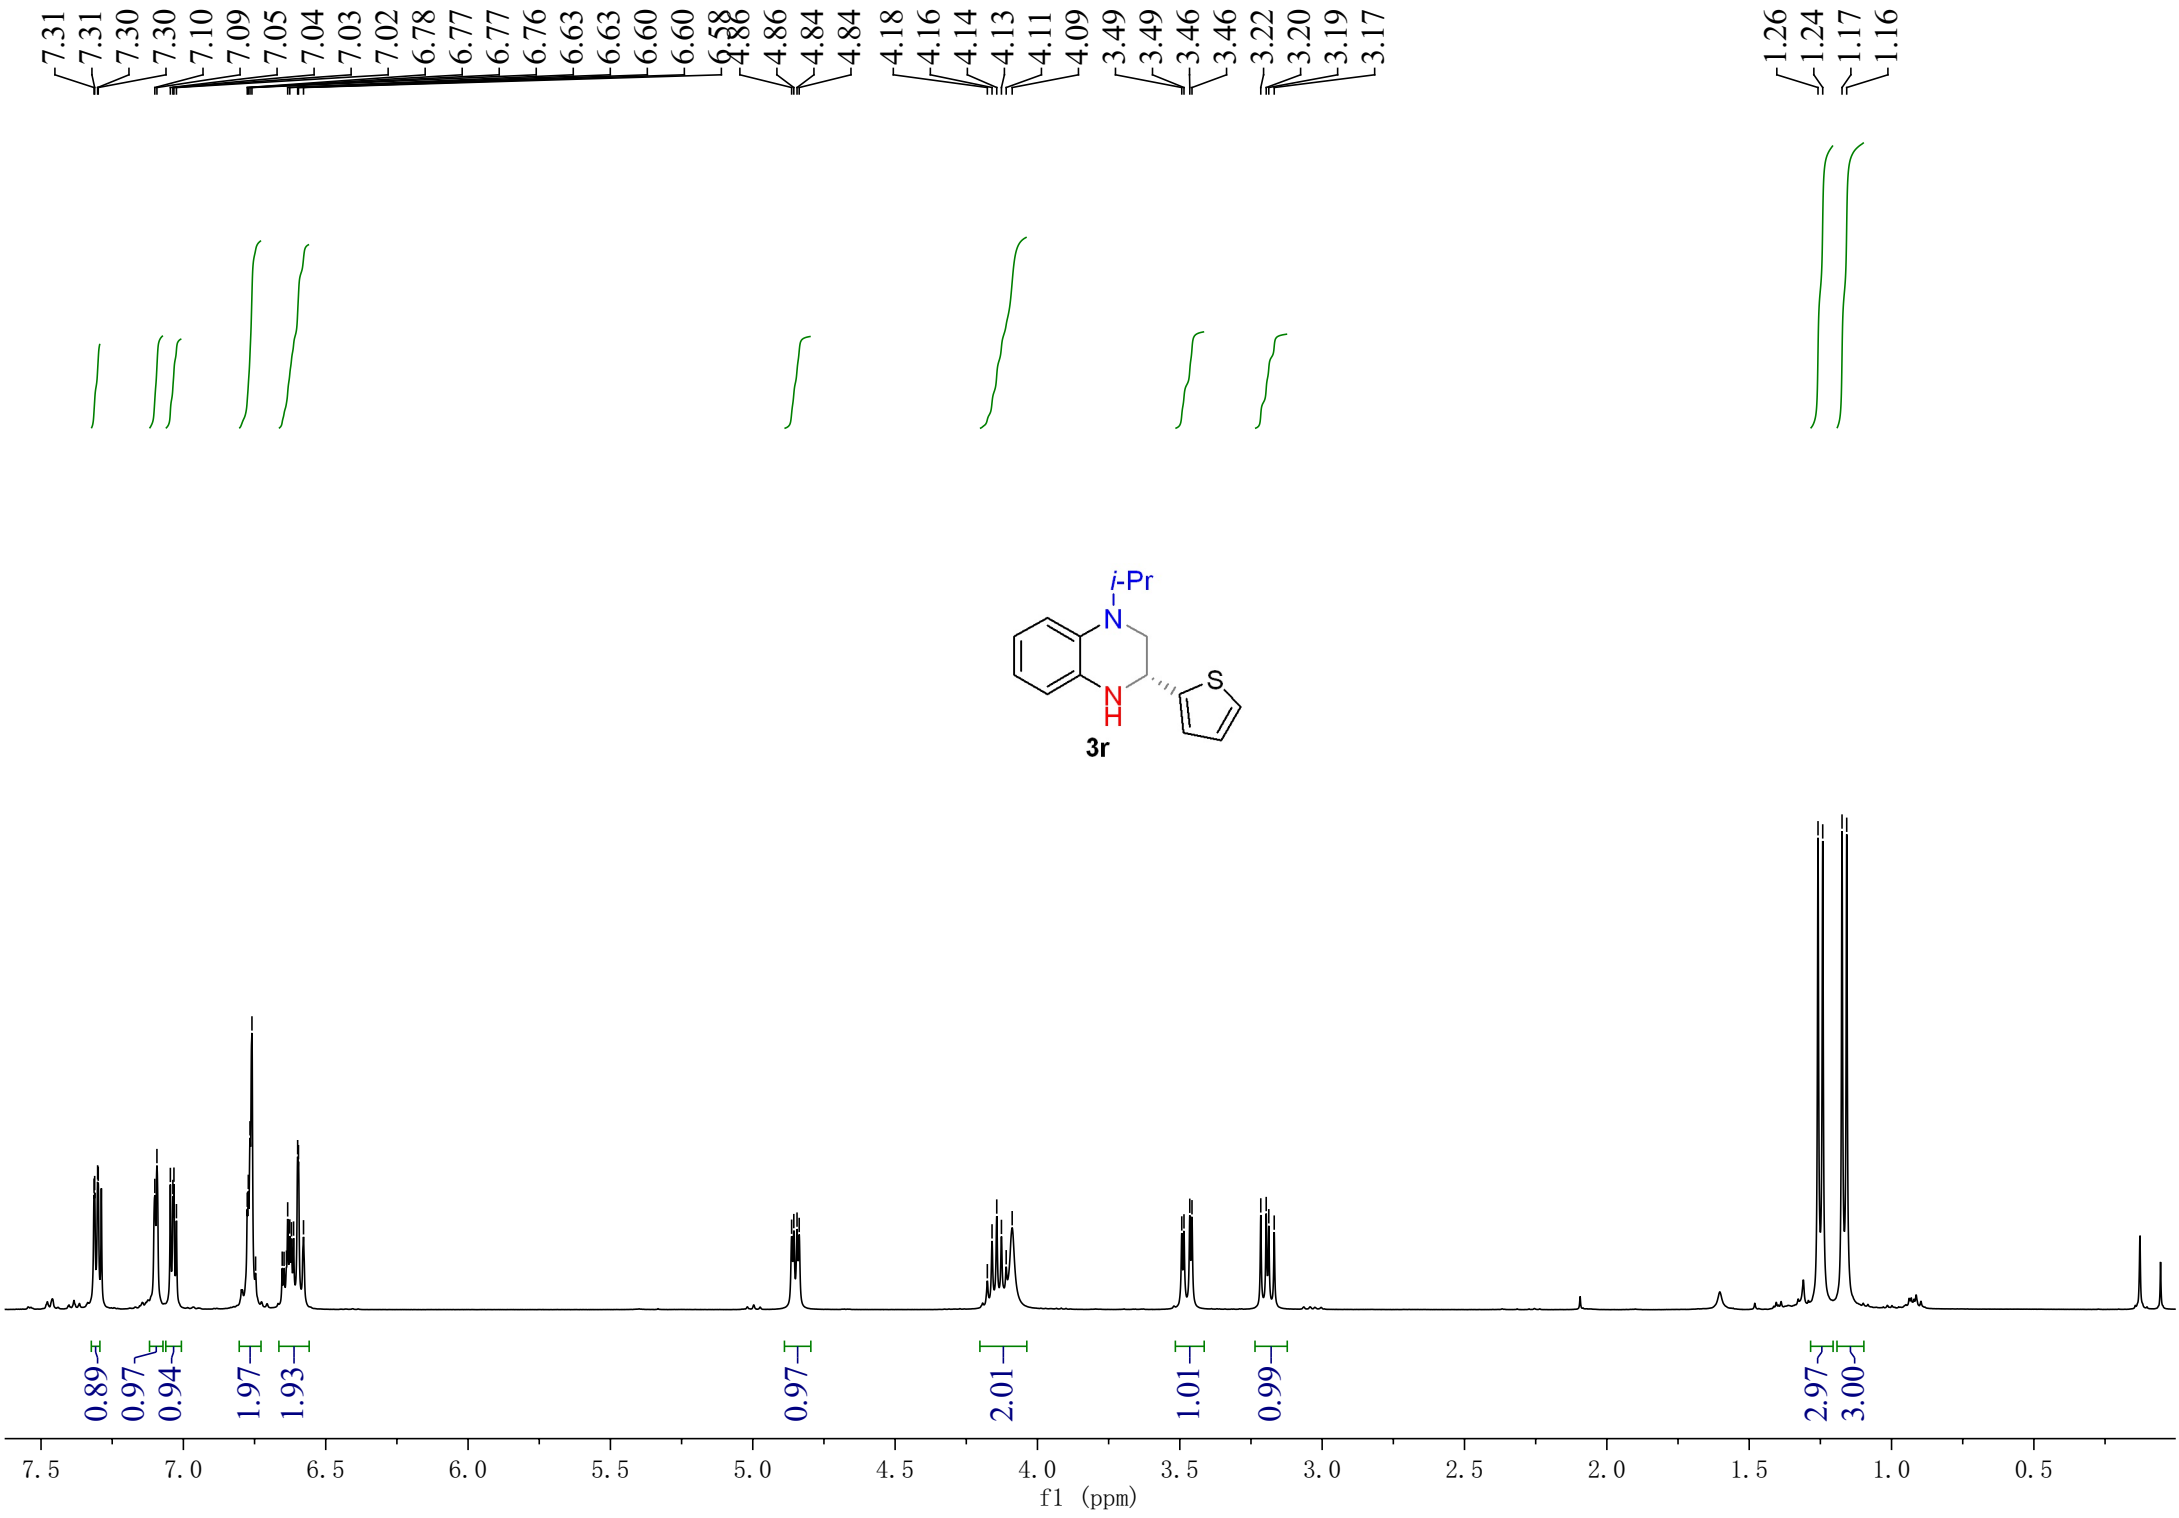

—146.18

~134.29  
~133.83

—126.50  
~125.00  
~124.05  
~119.39  
~117.46  
~114.35  
—111.50

~50.91  
~47.15  
~46.70

~19.21  
~18.14

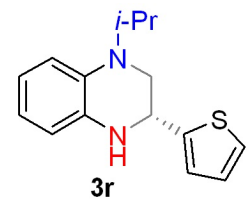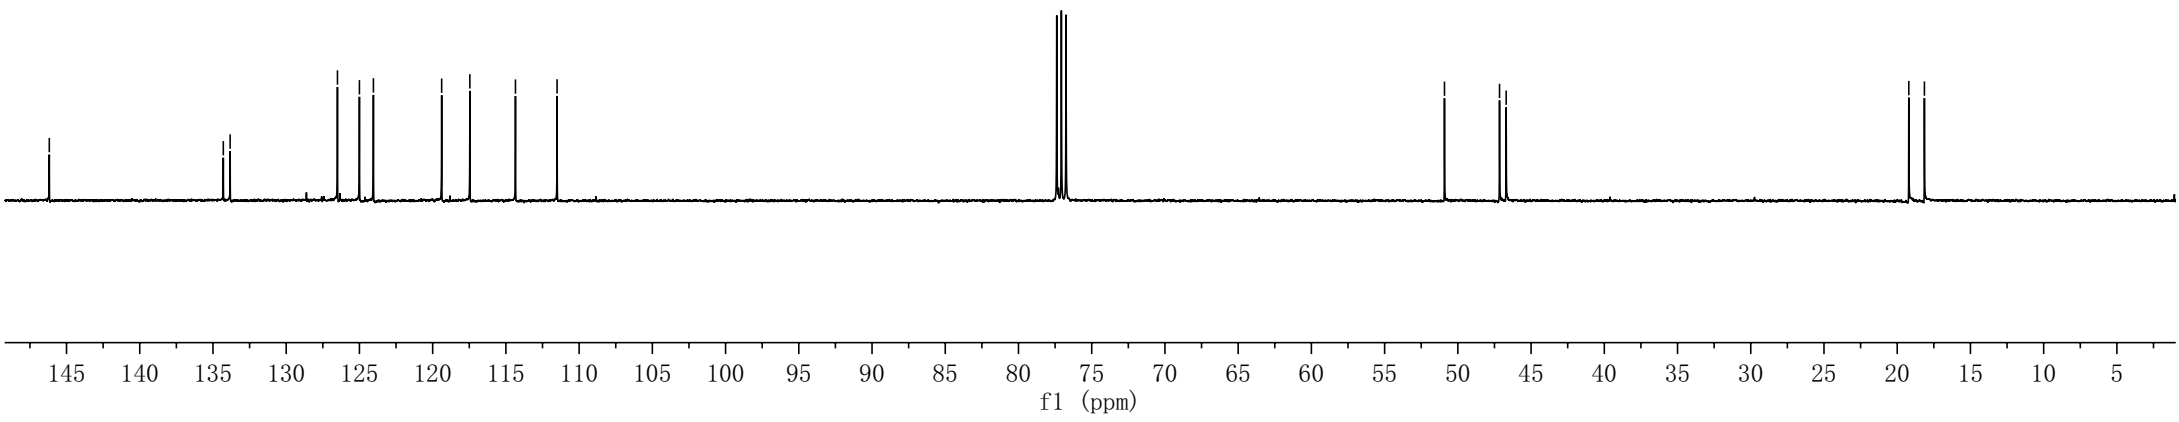

h  
7.33  
7.32  
7.31  
7.15  
7.07  
7.06  
6.74  
6.62  
6.61  
6.59

4.47  
4.47  
4.45  
4.45  
4.14  
4.12  
4.11  
4.09  
4.08  
3.94

3.36  
3.36  
3.33  
3.33  
3.03  
3.01  
3.01  
2.98

1.23  
1.21  
1.09  
1.08

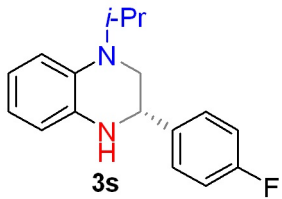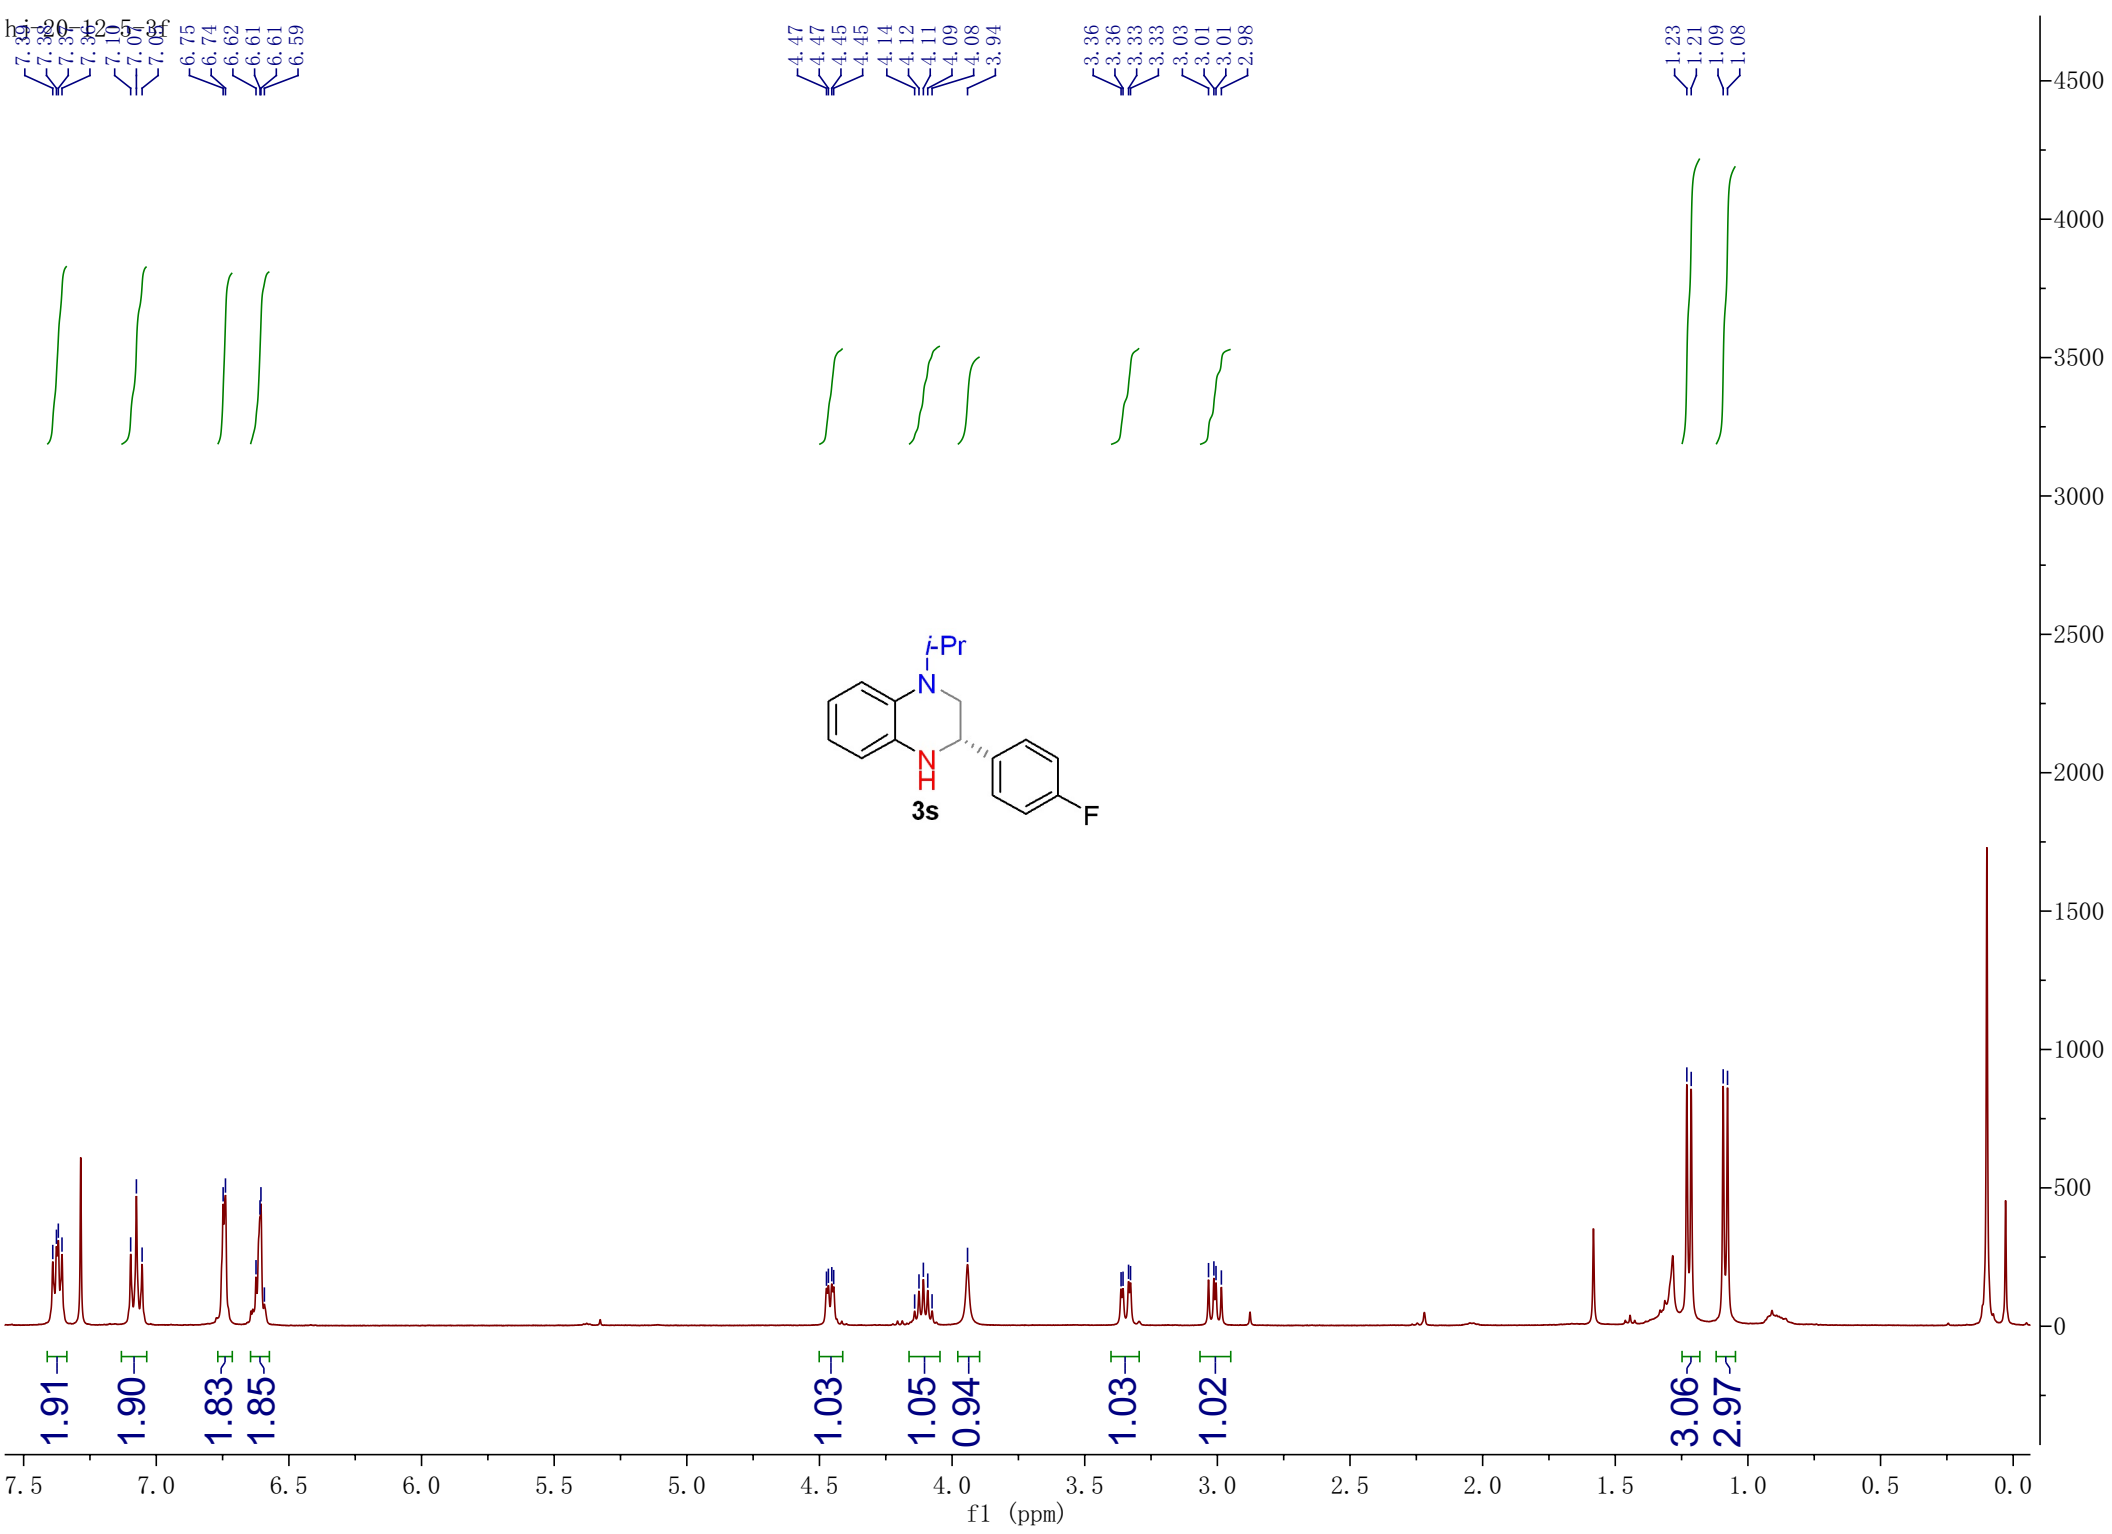



hj-1-9-2

~163.62  
~161.18

~138.12  
~134.58  
~134.18  
~128.63  
~128.55

~119.06  
~117.36  
~115.51  
~115.30  
~114.01  
~111.43

~54.31

~46.91  
~46.68

~19.27  
~17.99

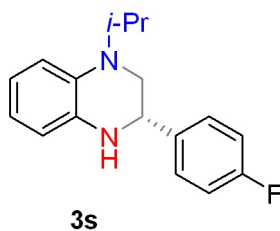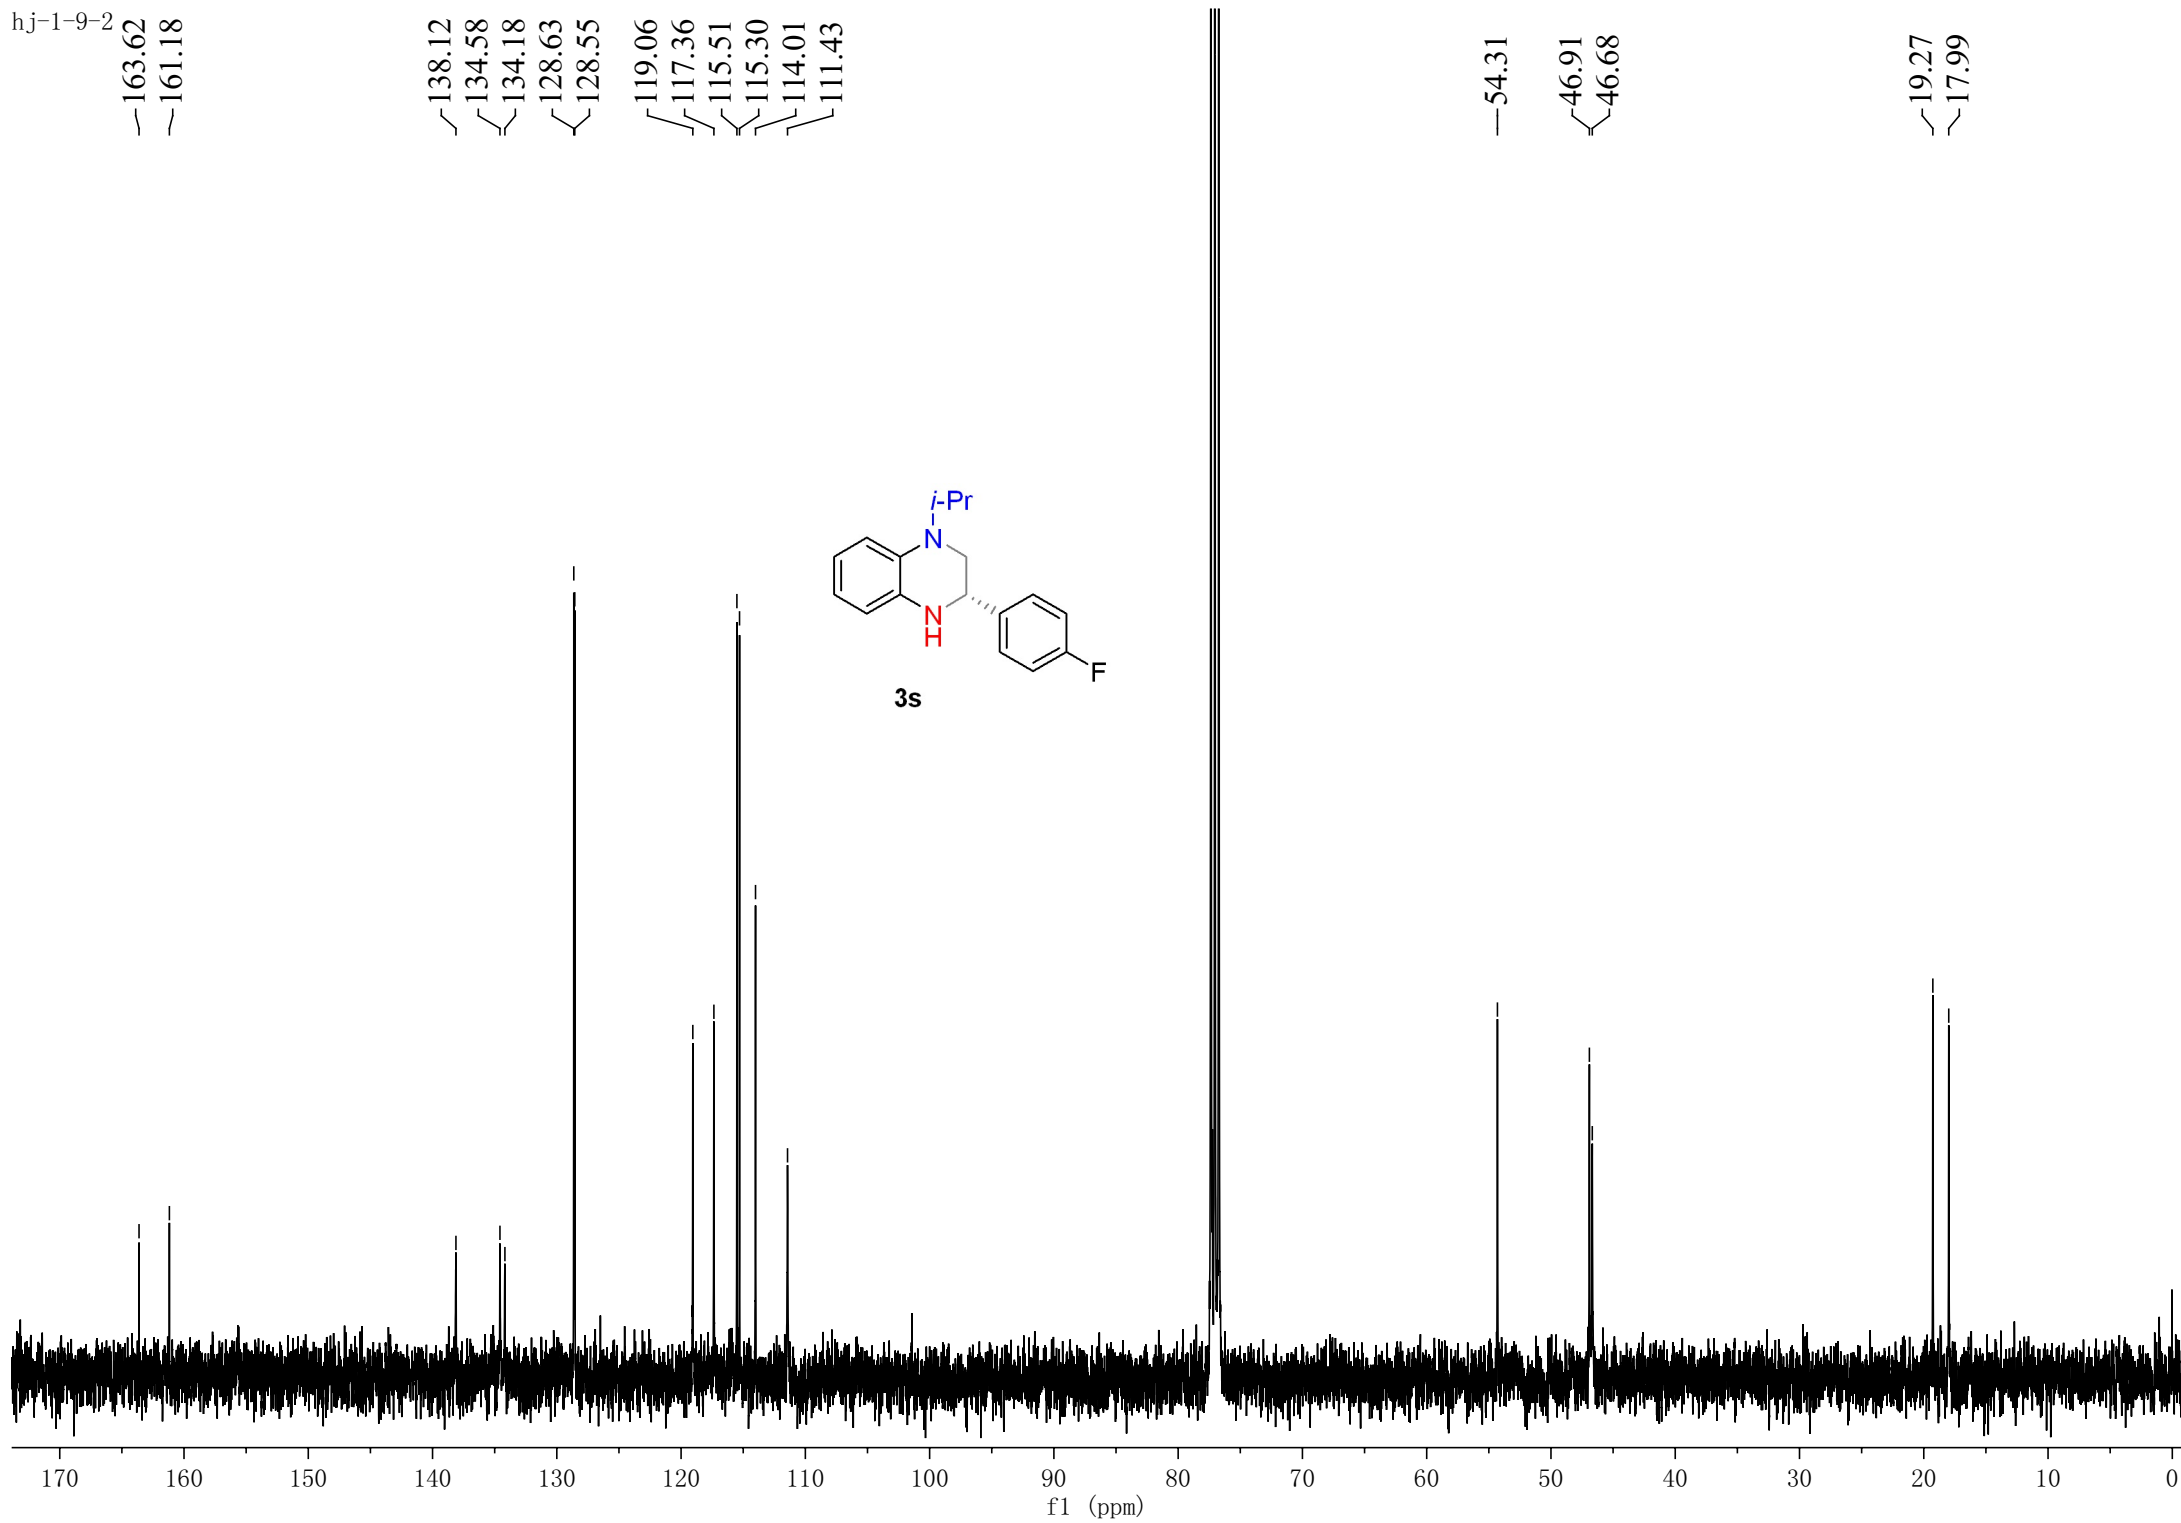

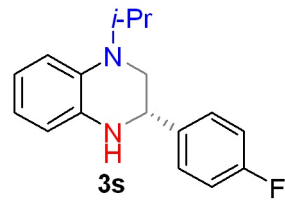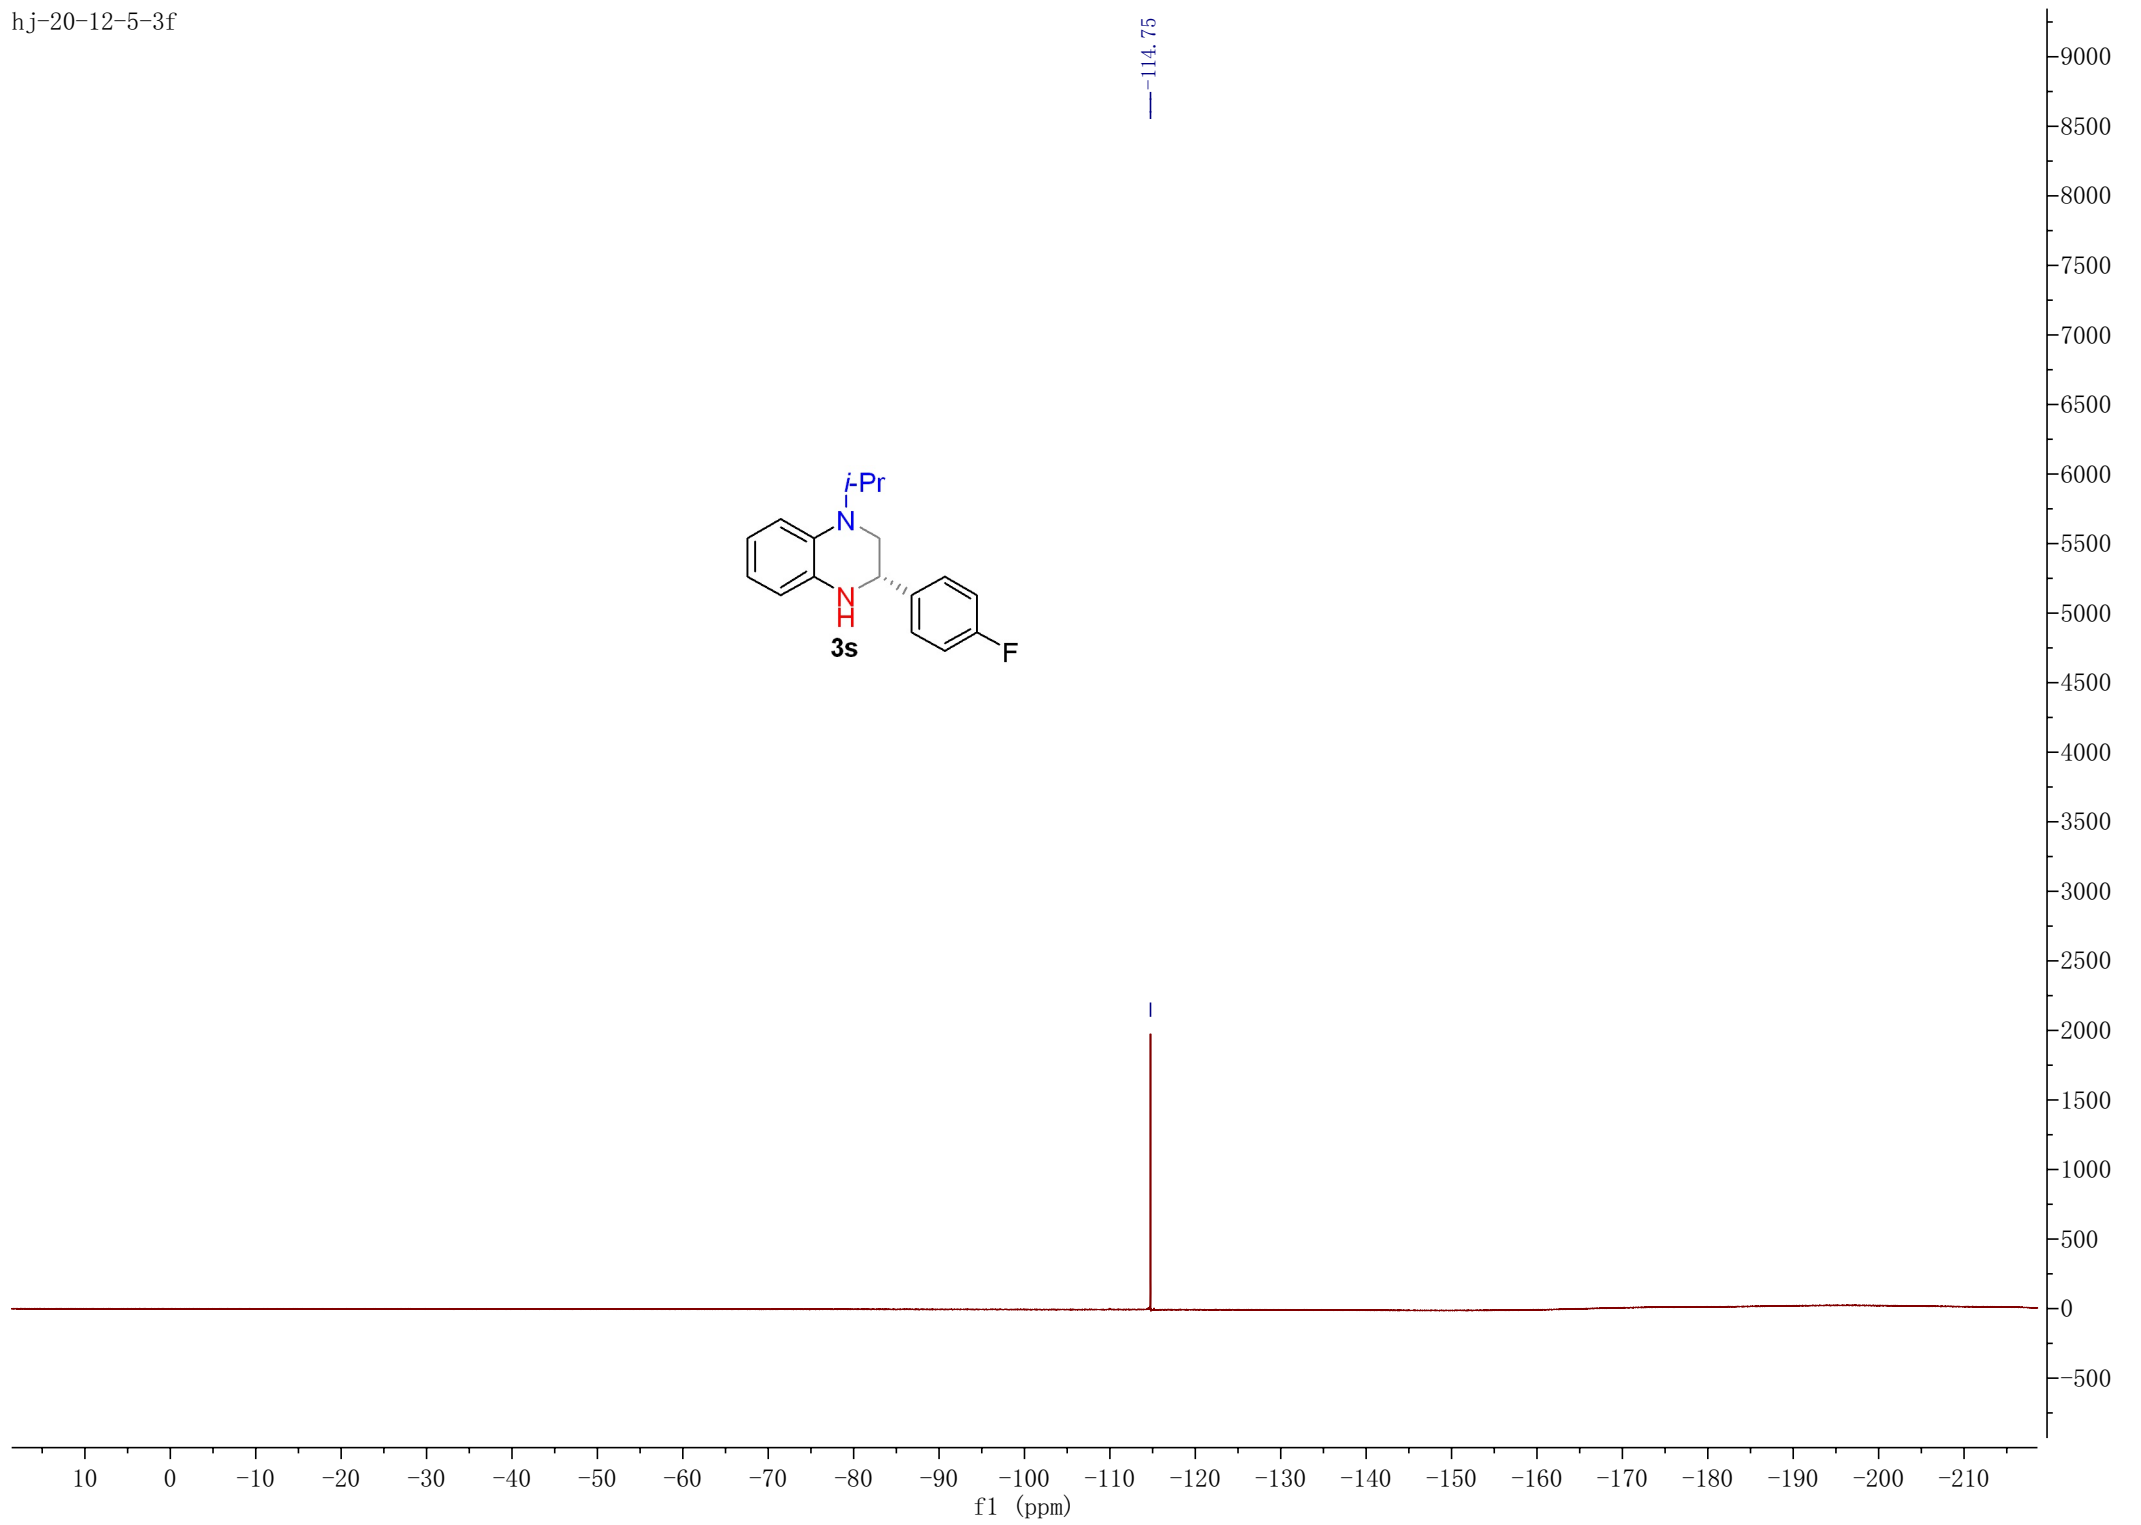

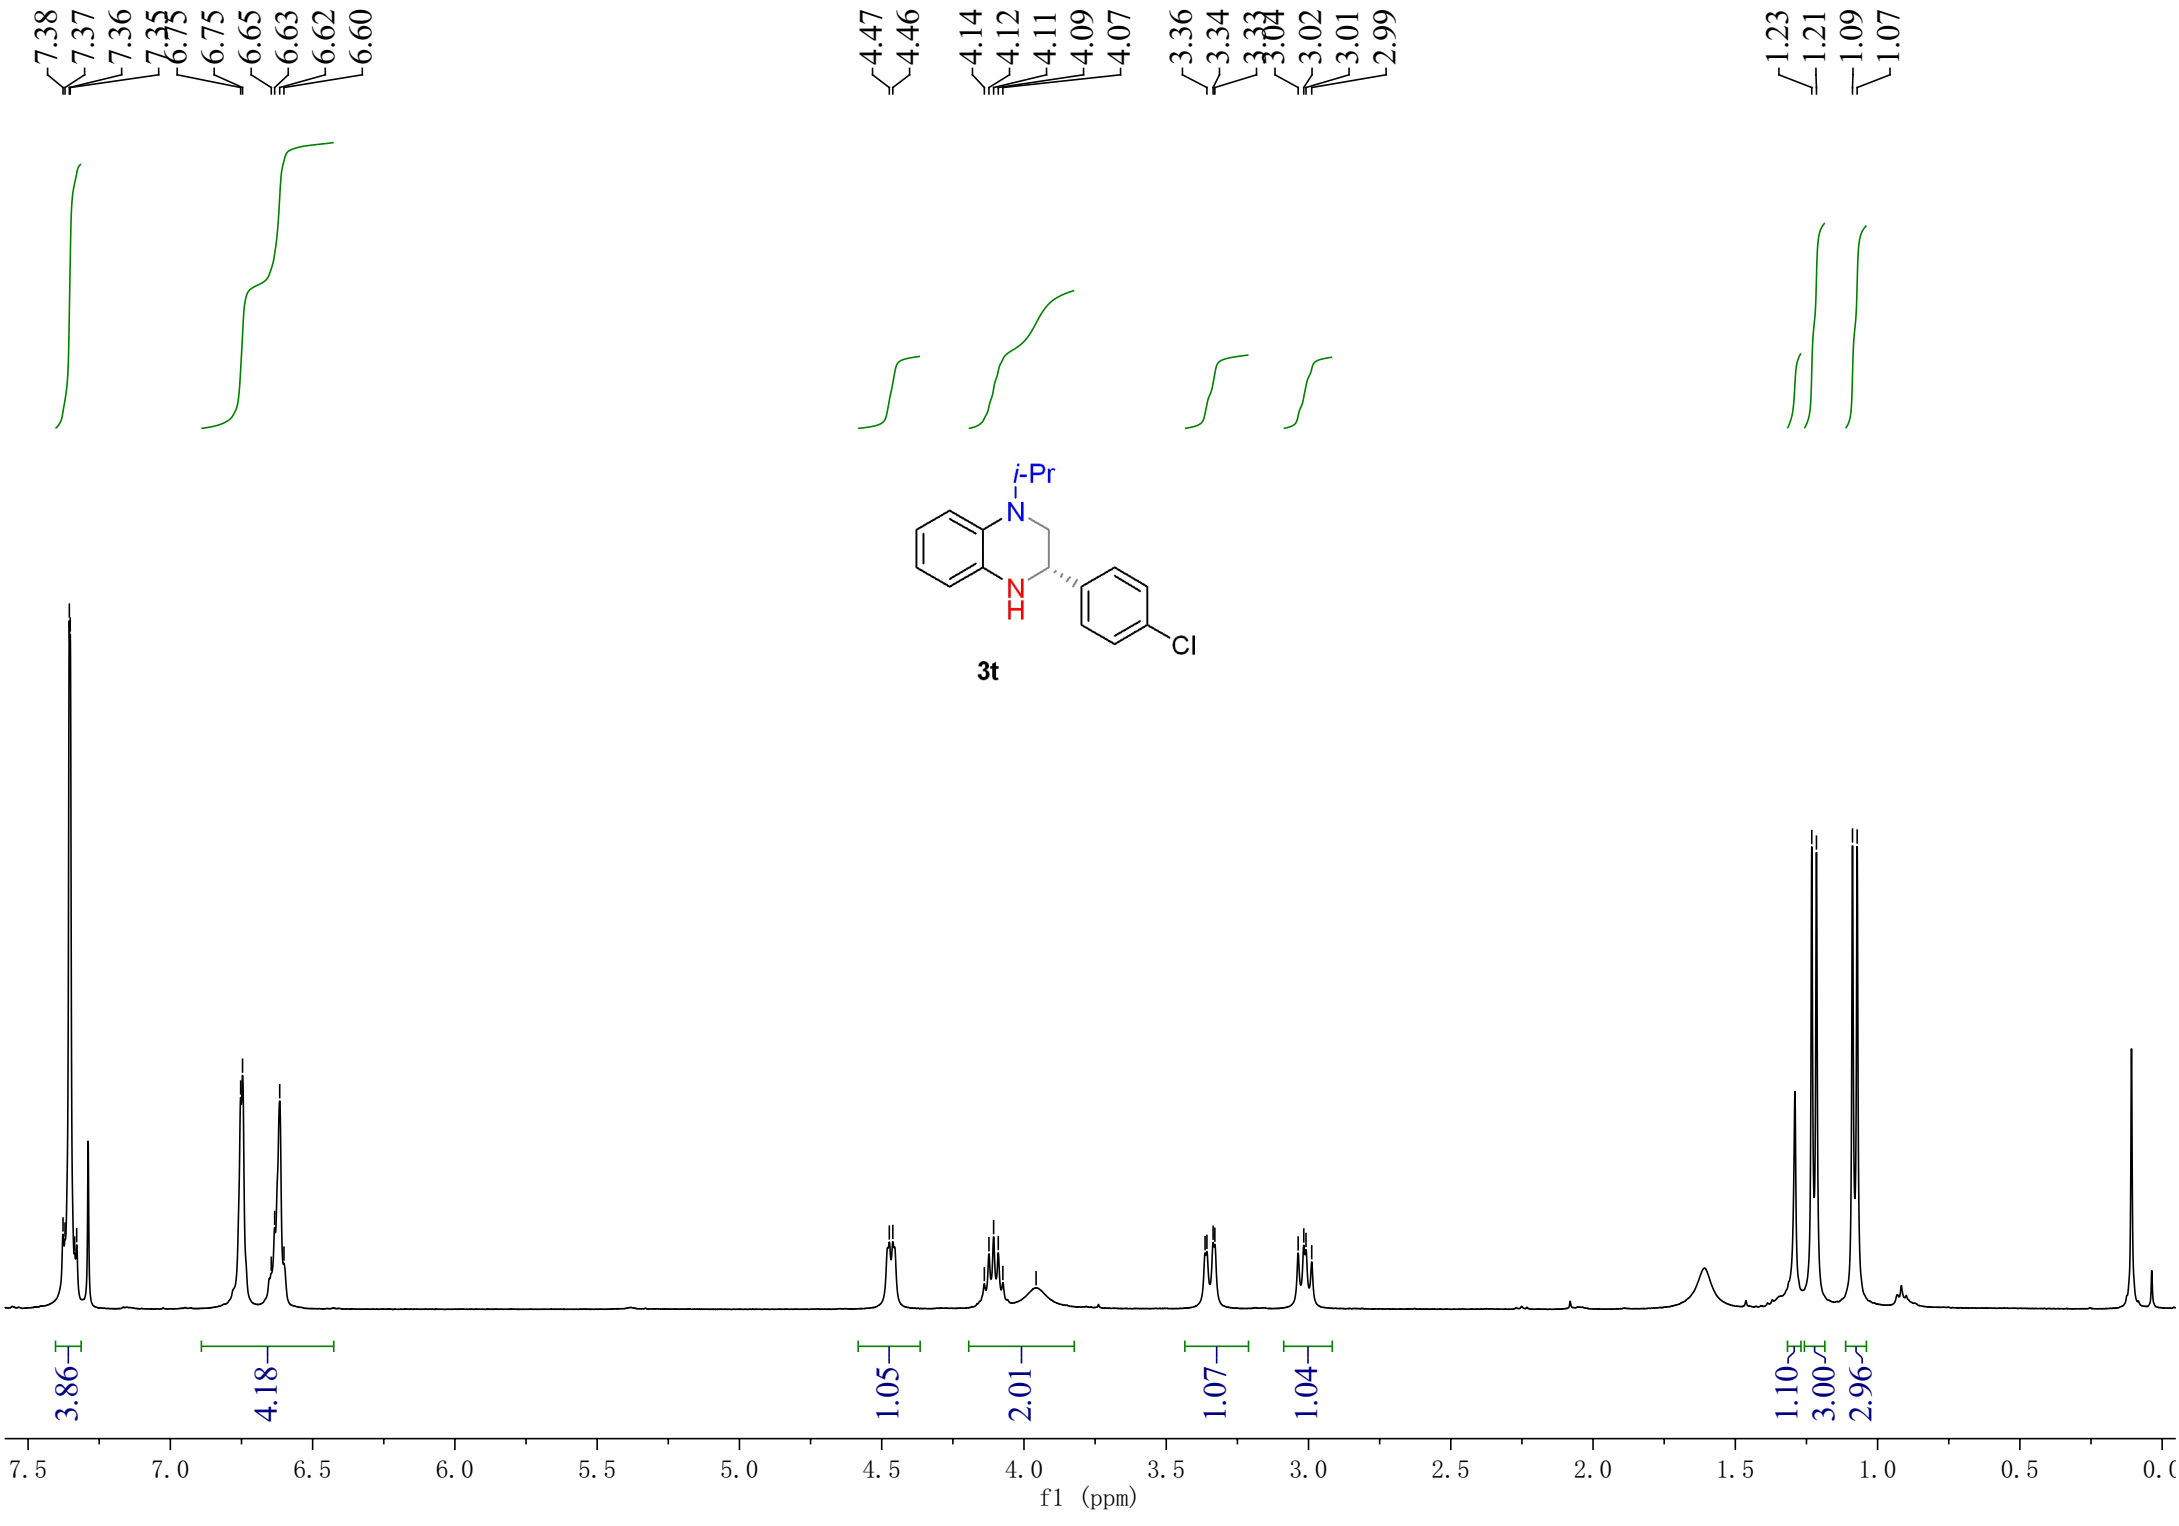

—140.98  
—134.44  
—134.19  
—133.48  
—128.71  
—128.37

—119.08  
—117.44  
—114.04  
—111.50

—54.41

—46.69

—29.73

—19.18  
—18.08

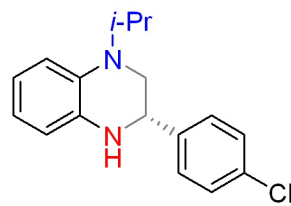

3t

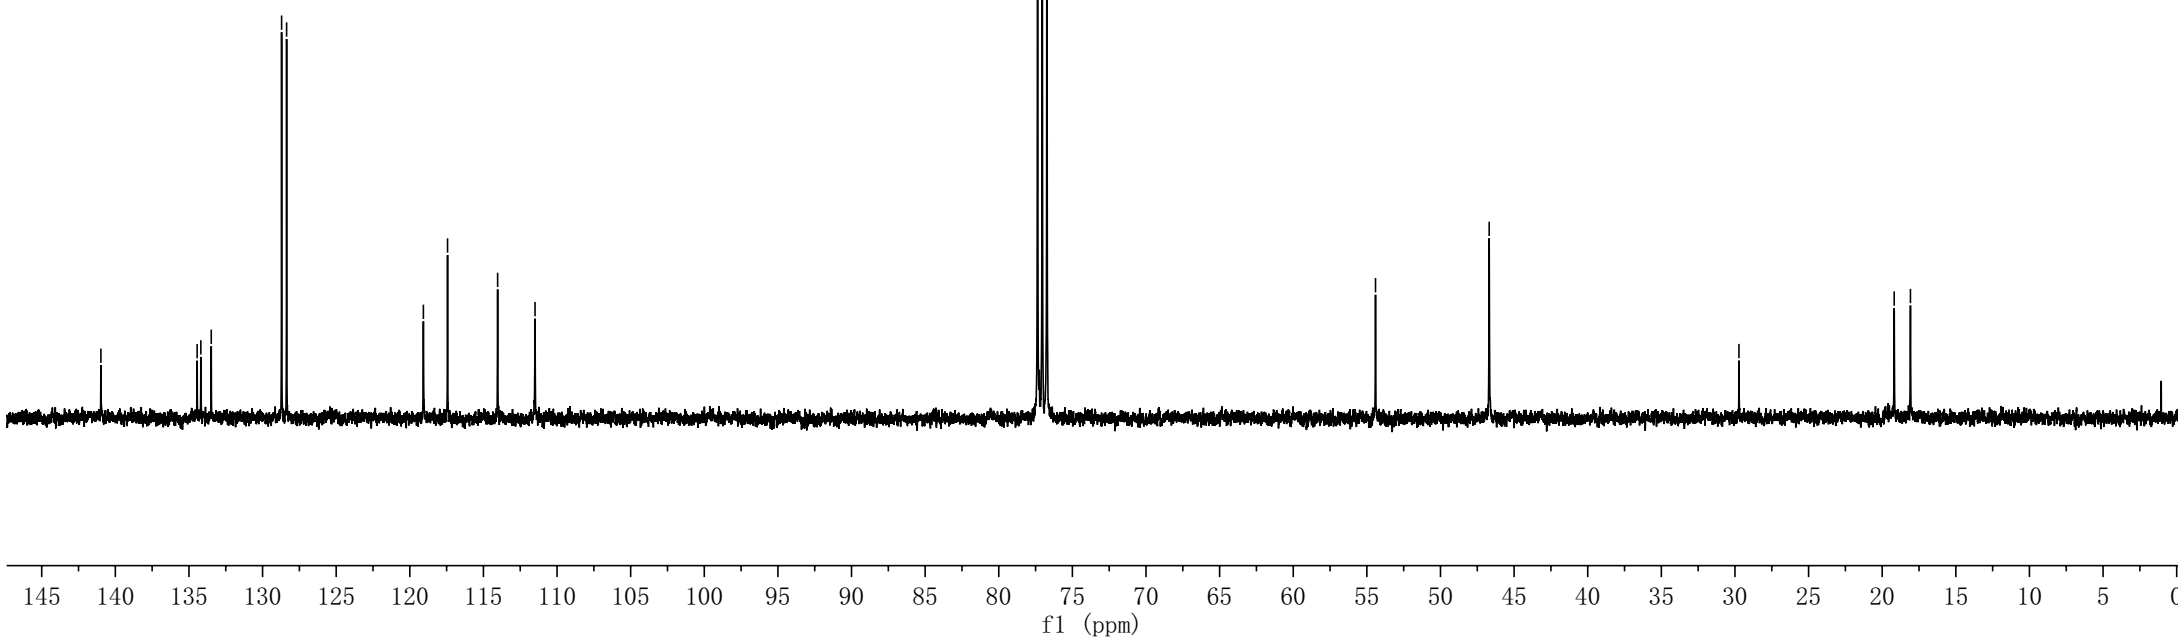

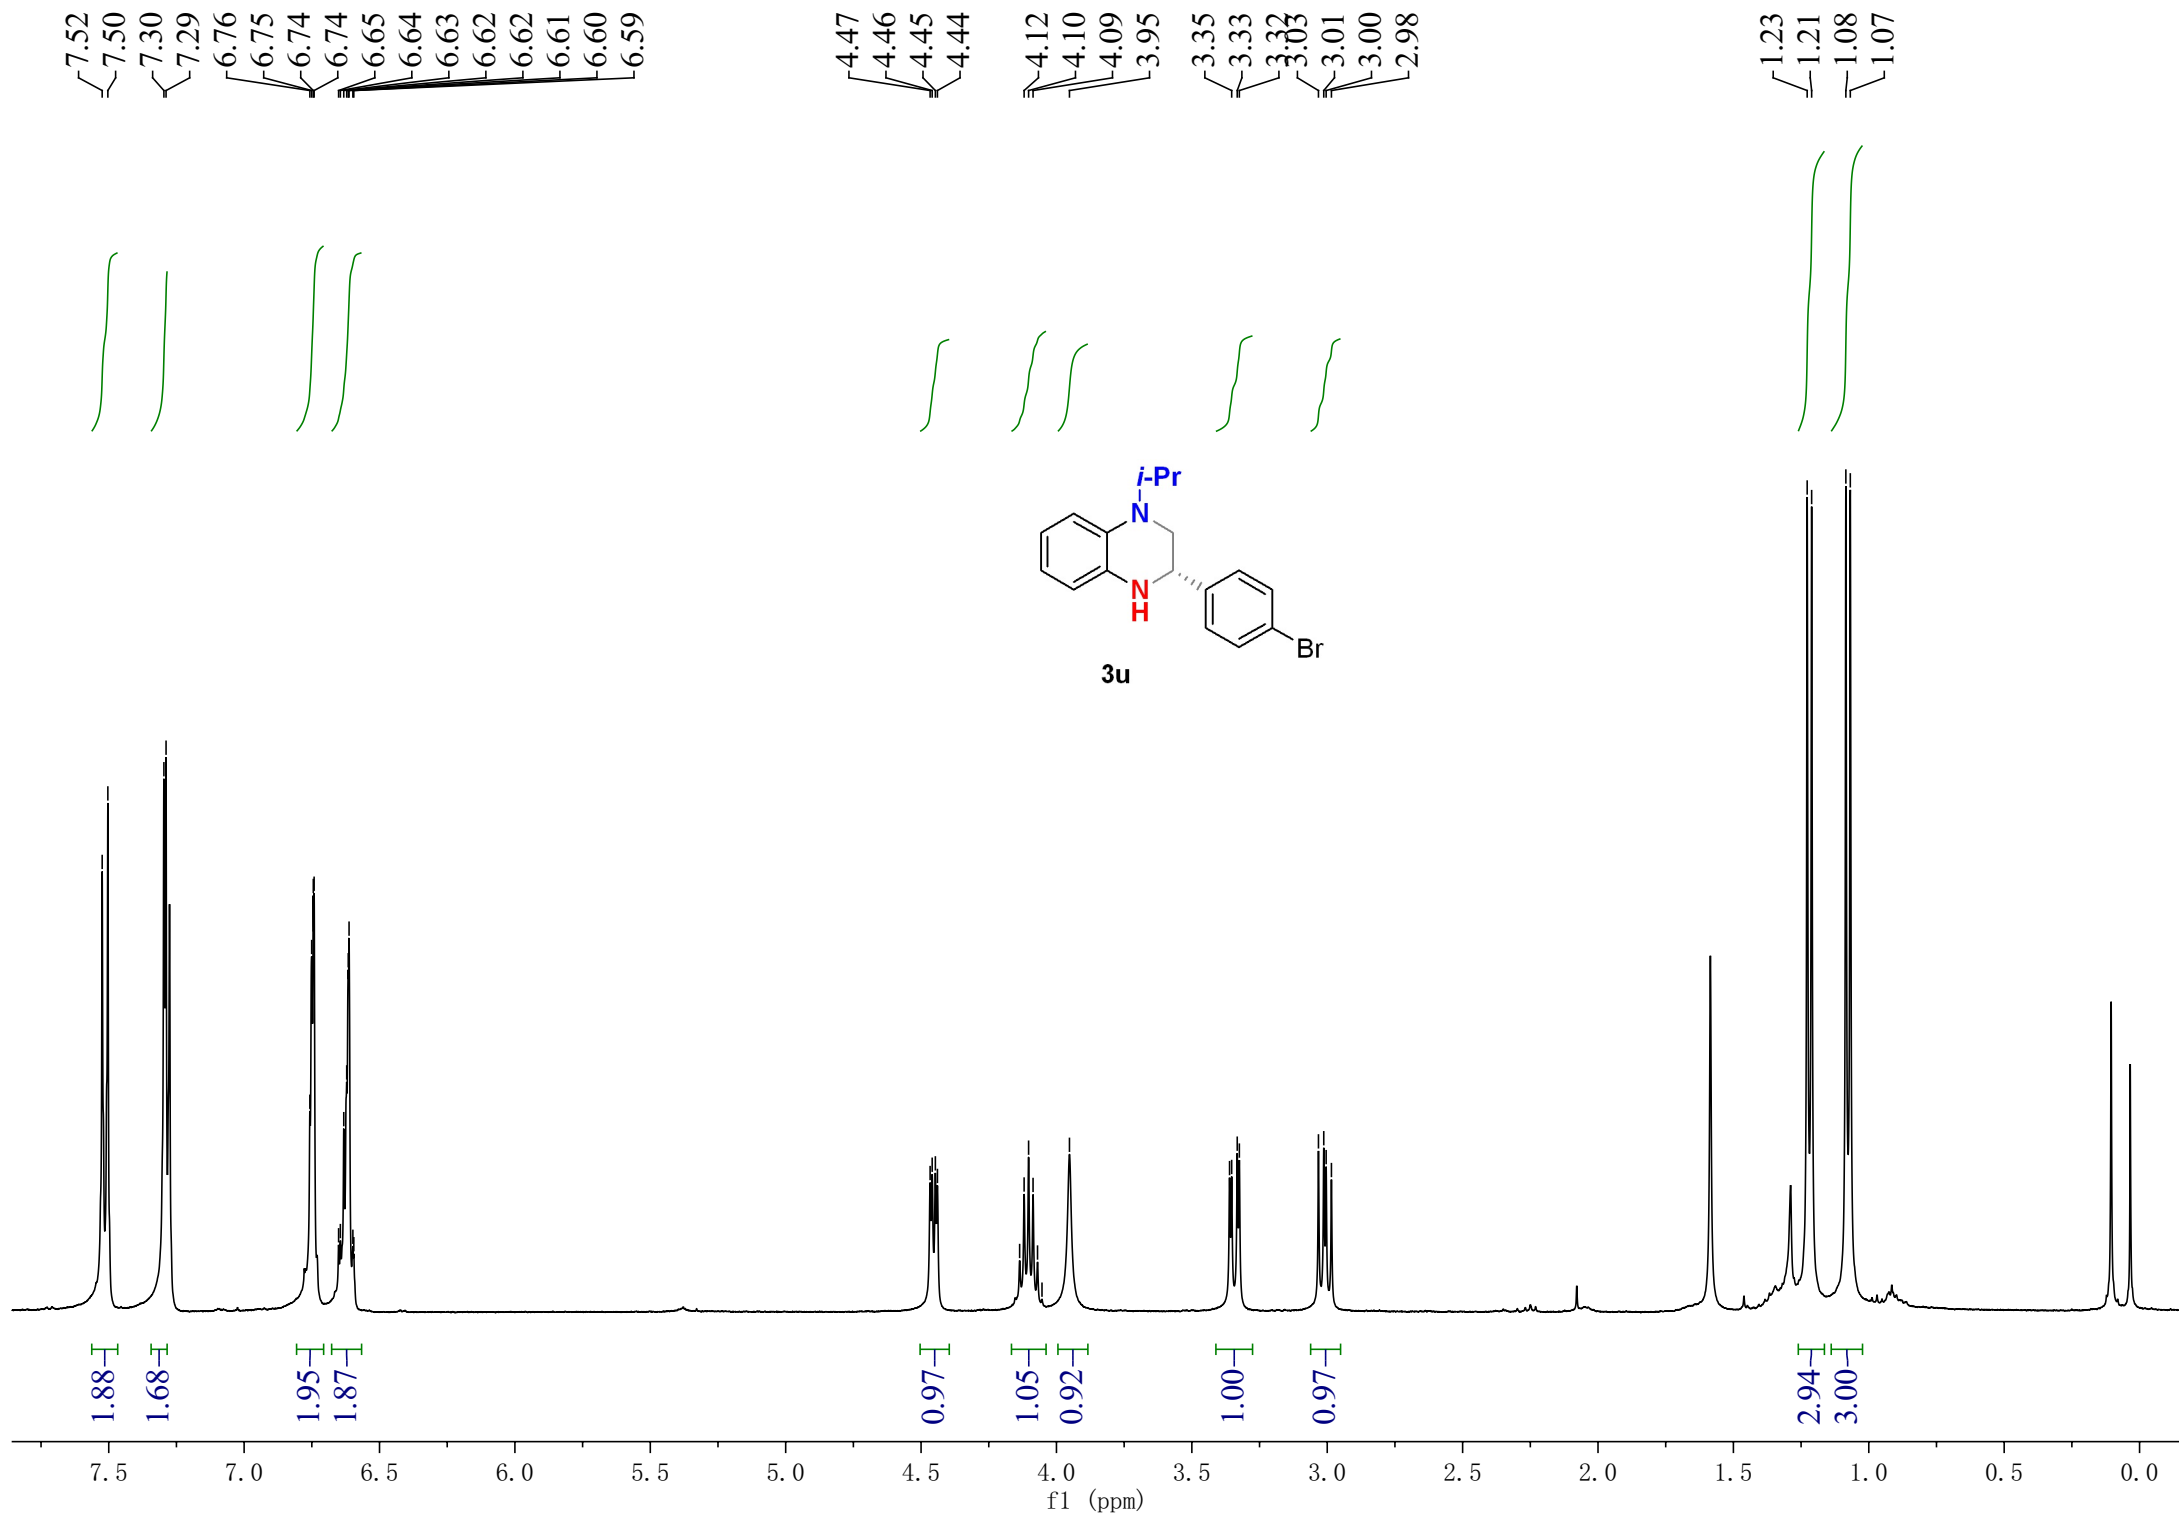

—141.51  
—134.41  
—134.19  
—131.66  
—128.72  
—121.59  
—119.08  
—117.44  
—114.03  
—111.50

—54.47  
—46.68  
—46.63

—19.17  
—18.09

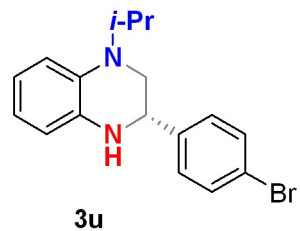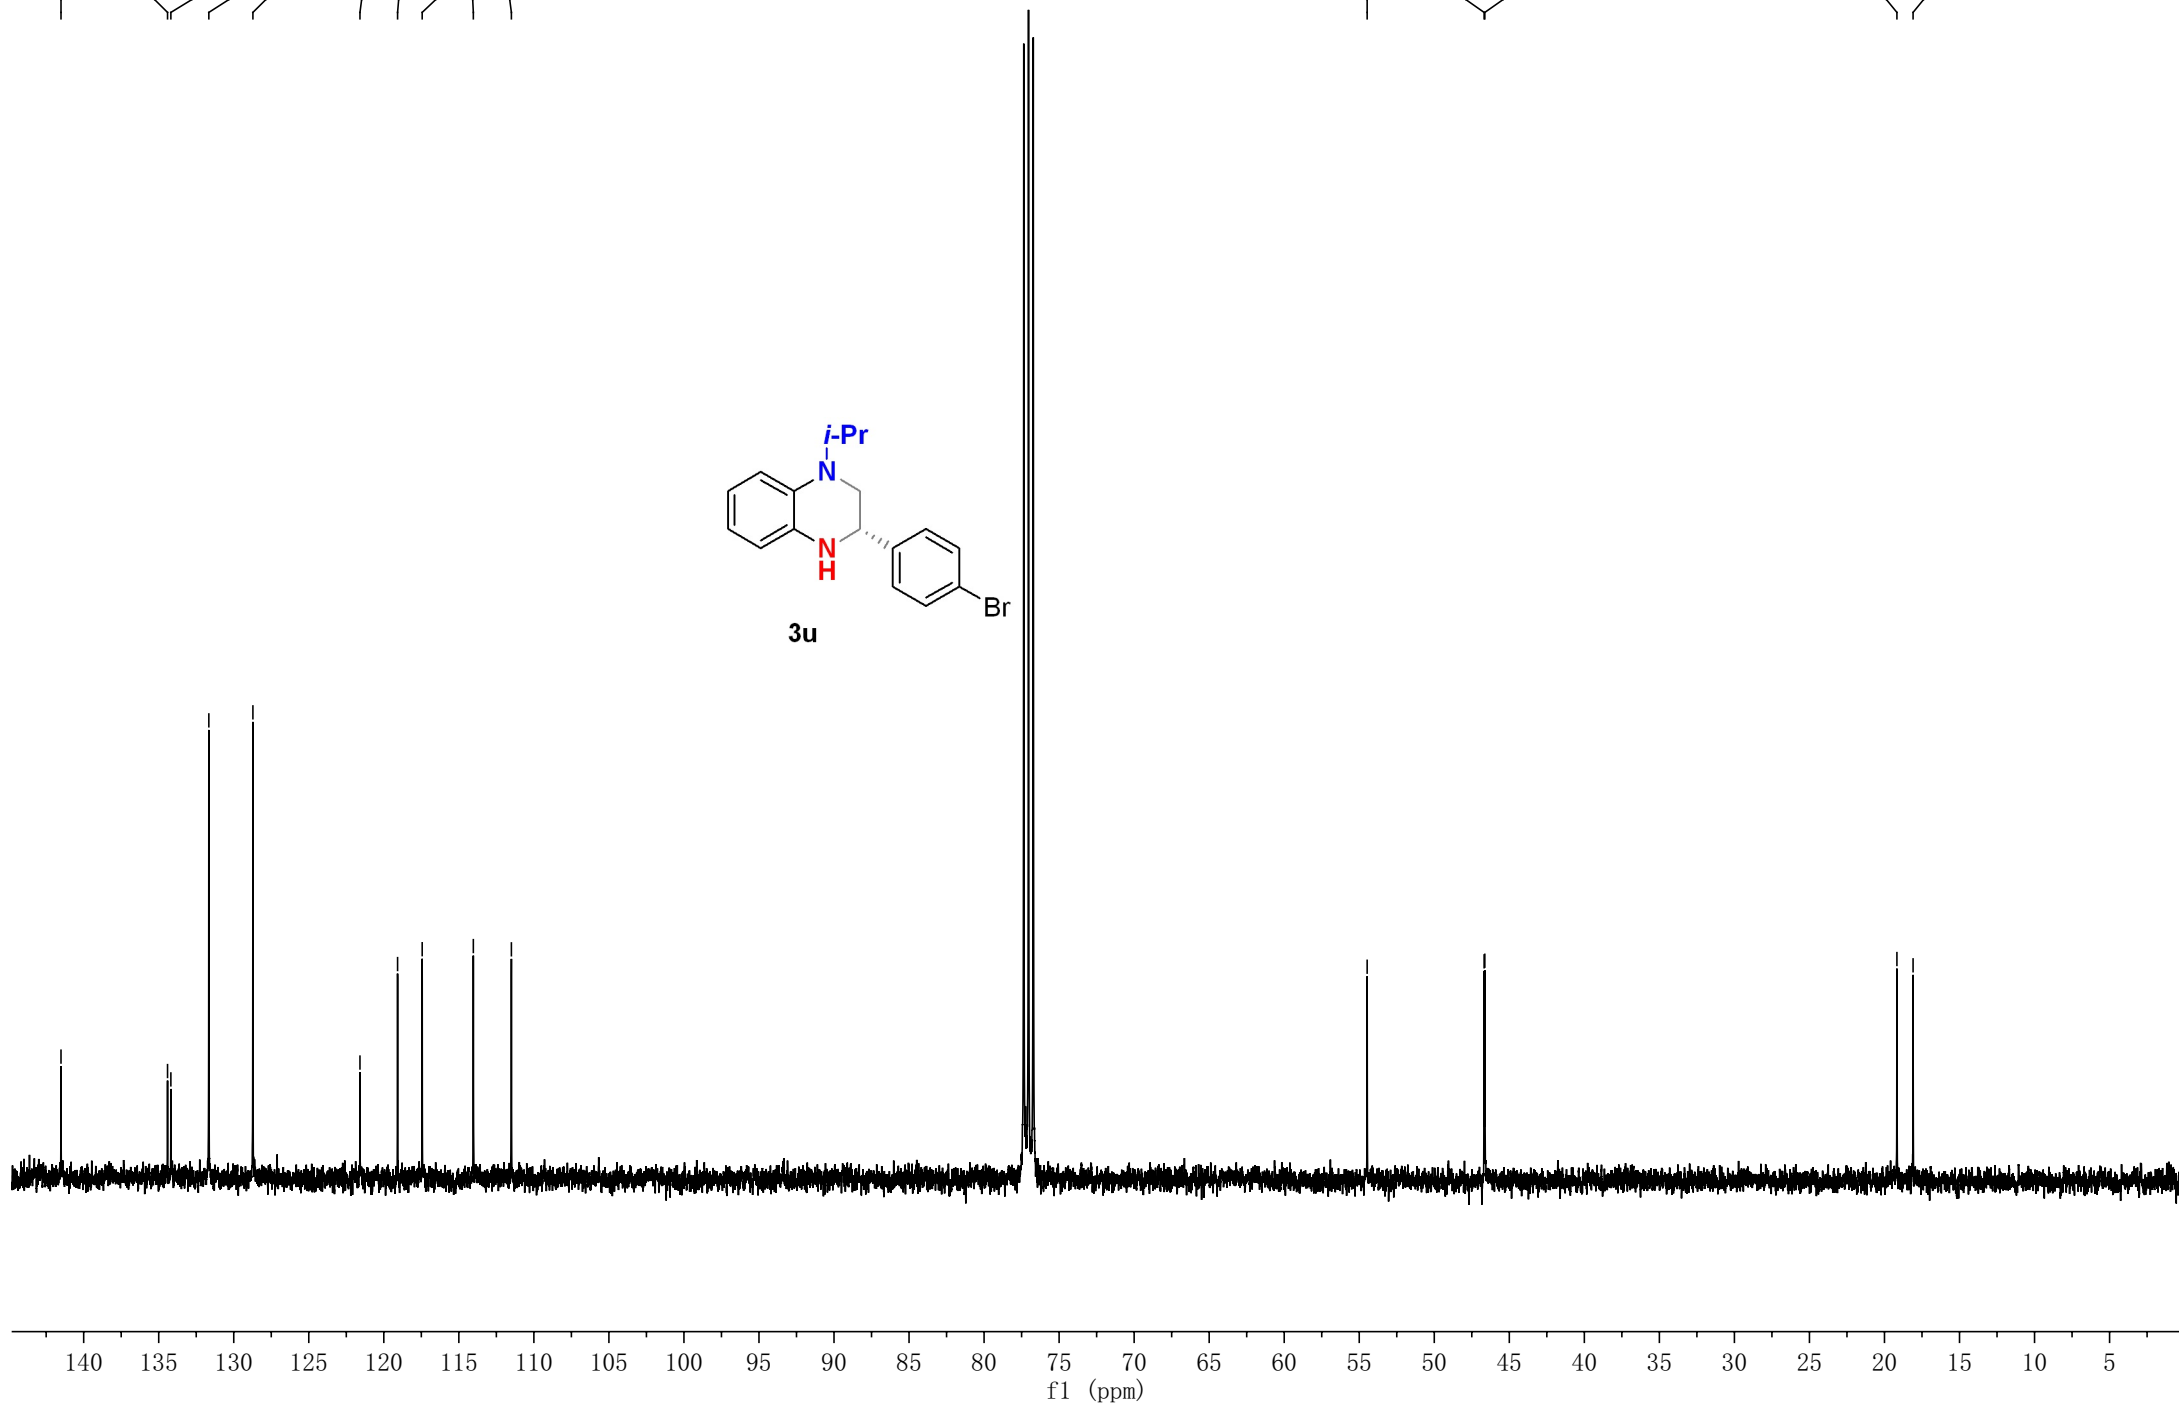

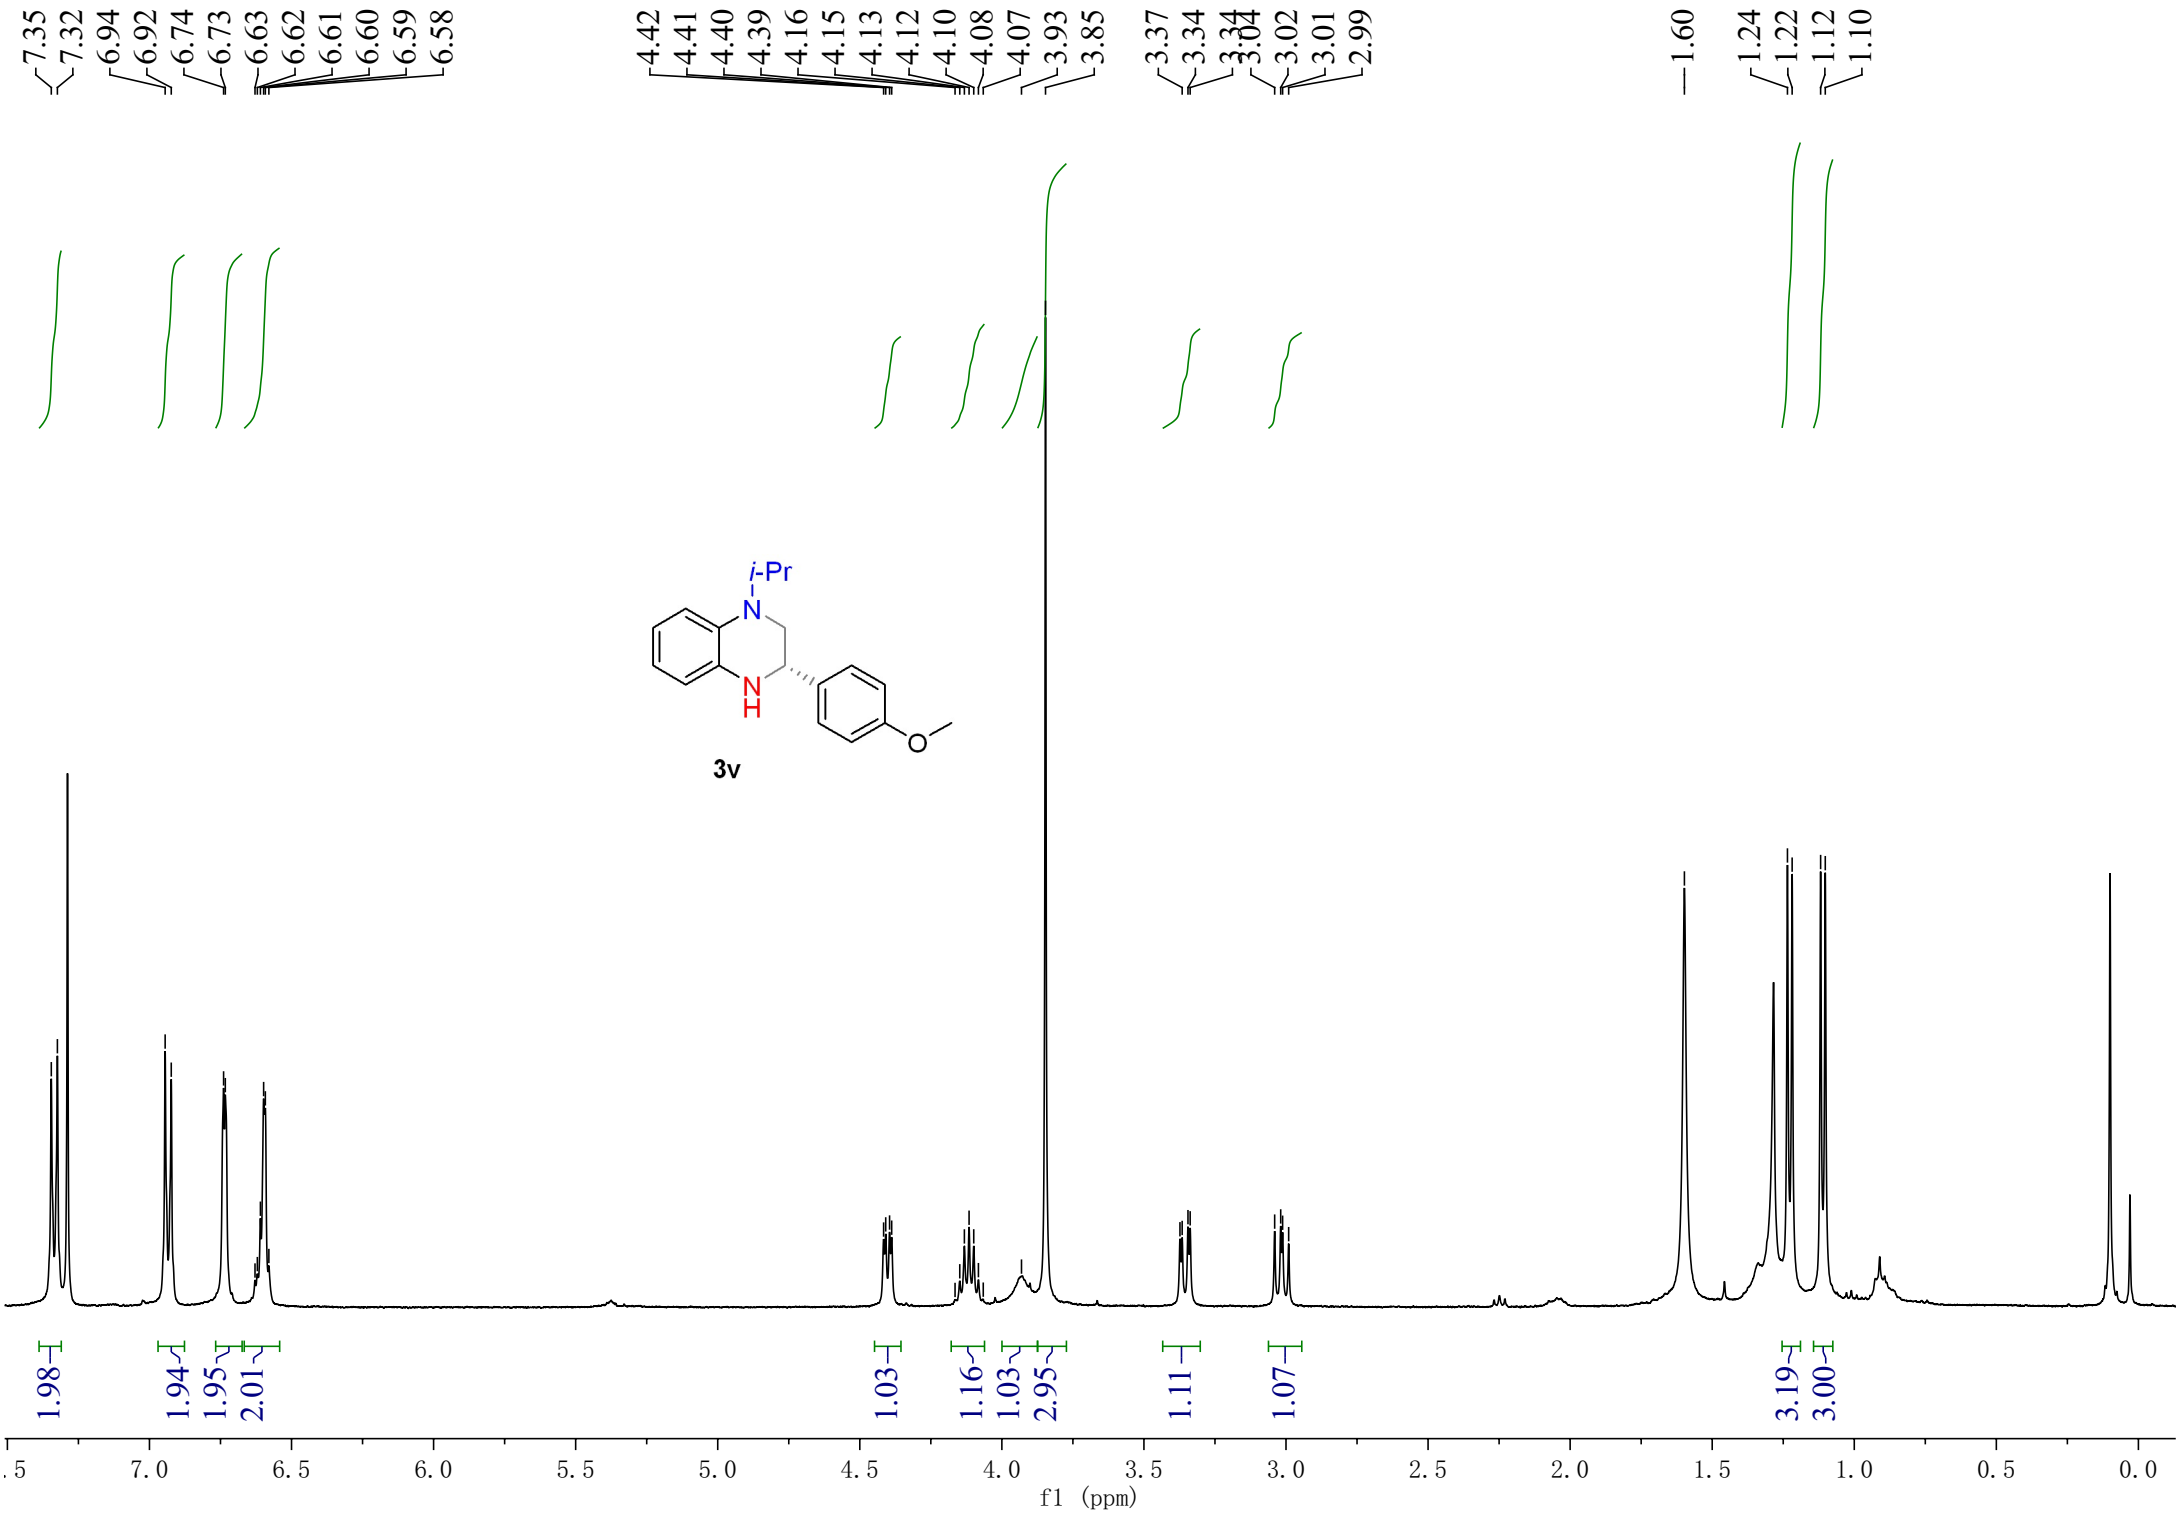

hj-19-17-3a

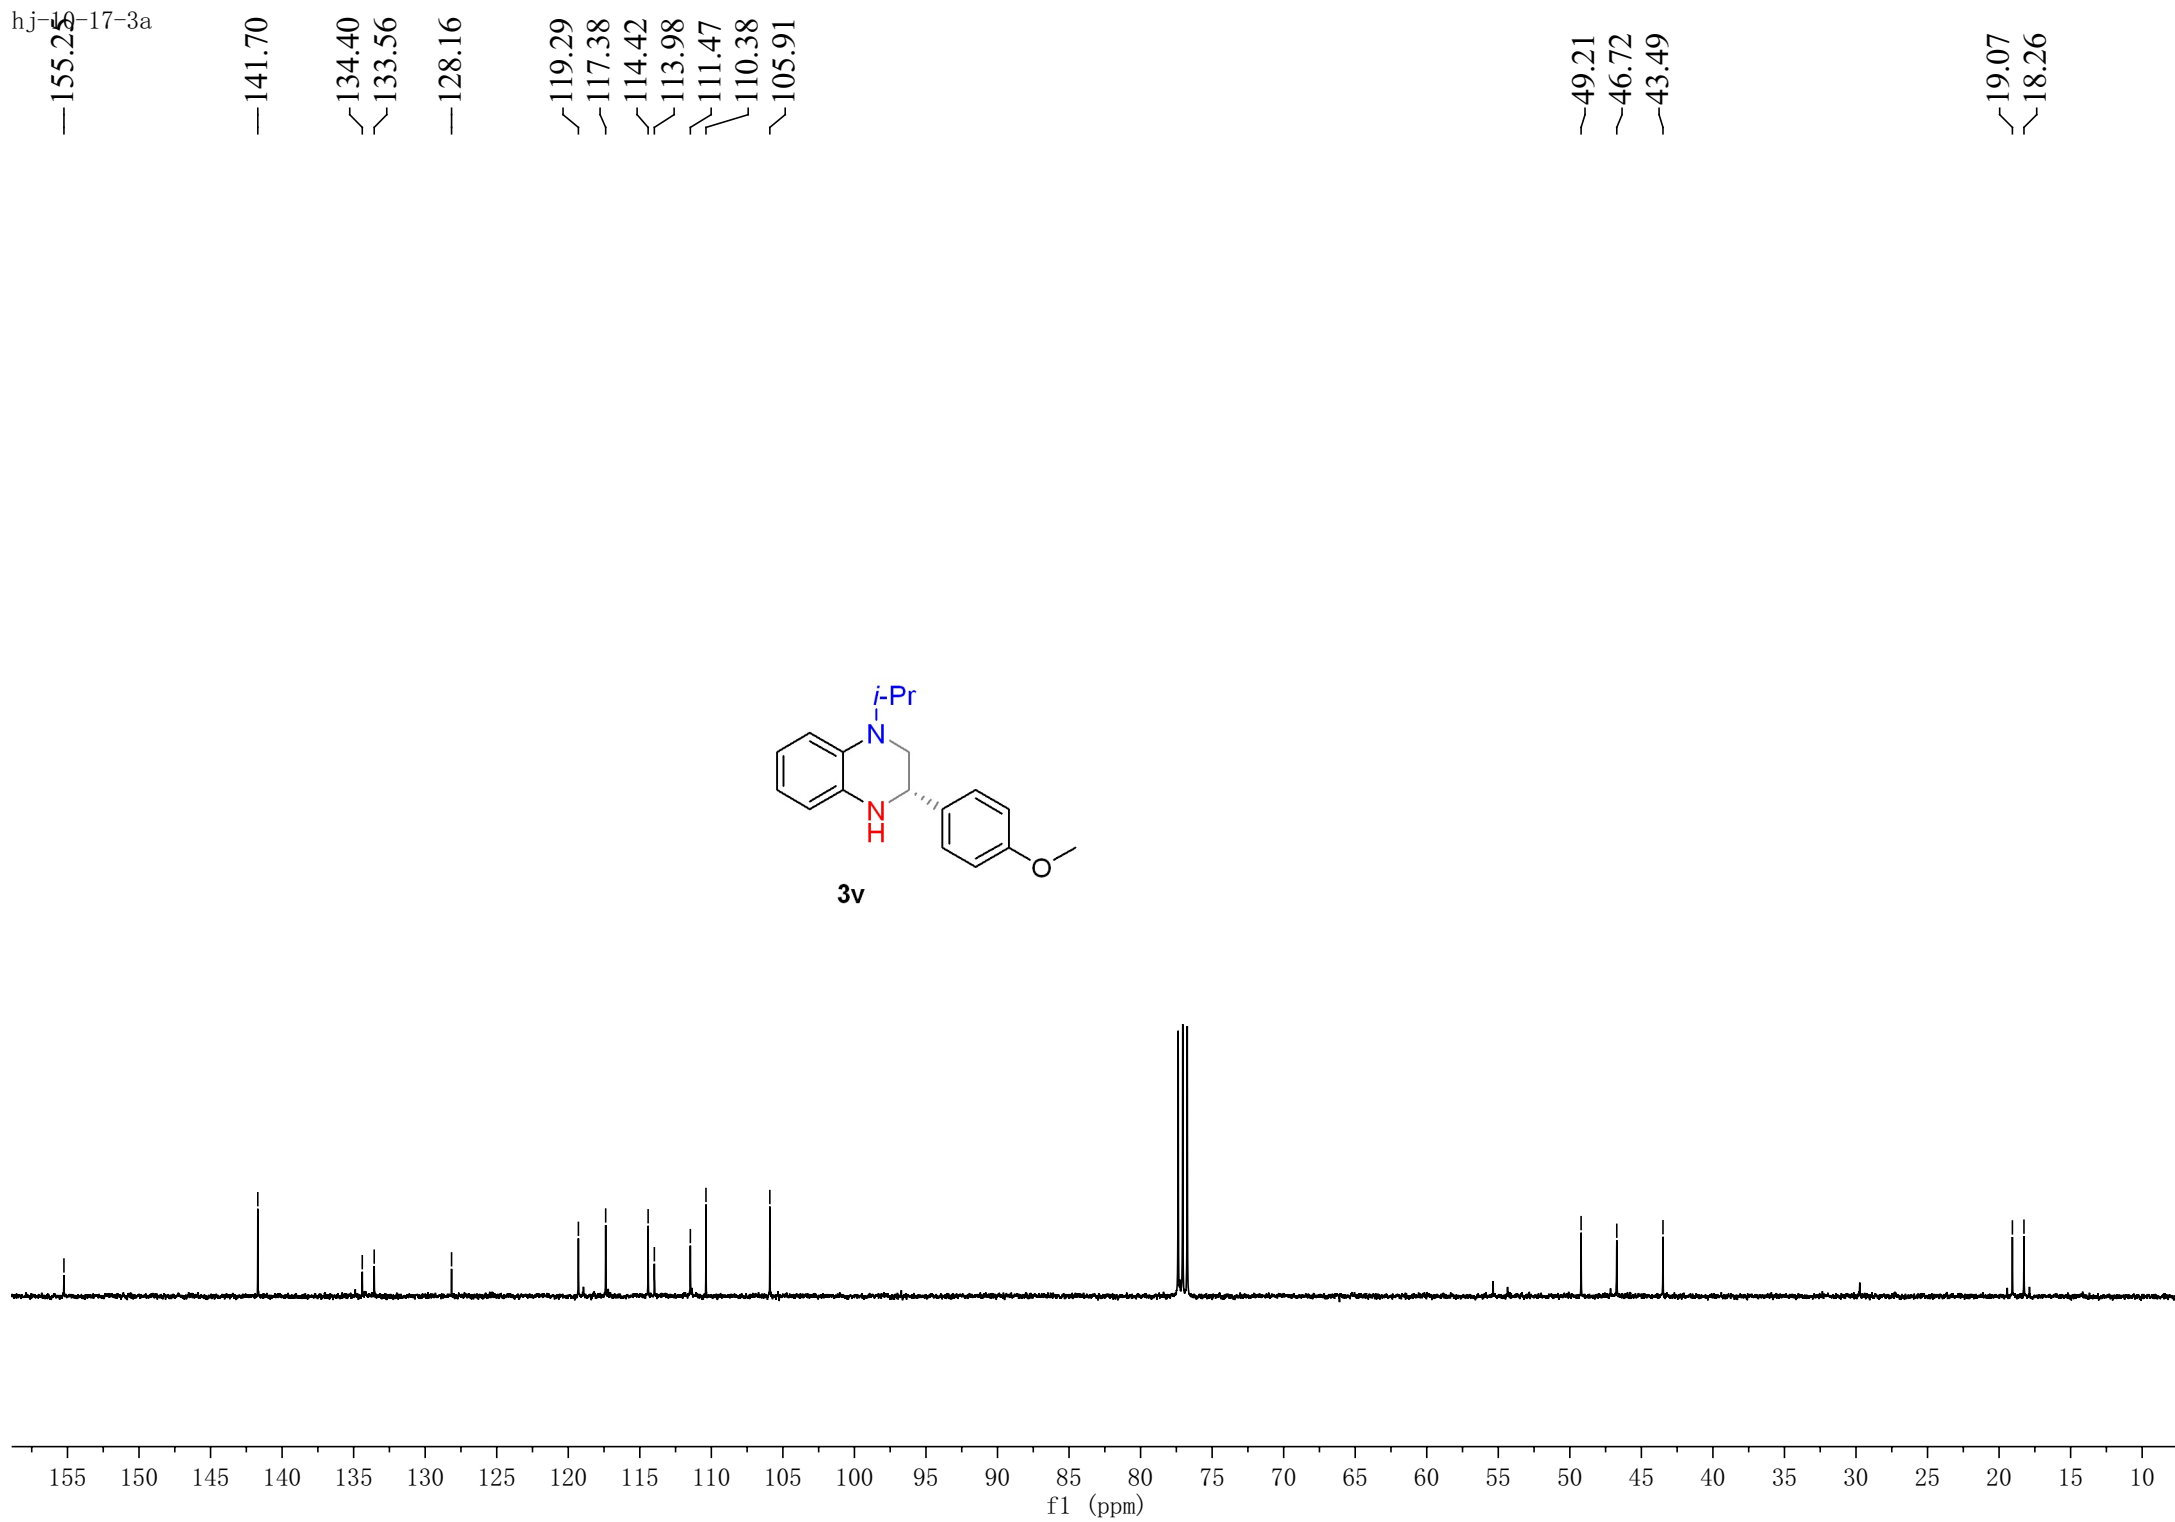



7.28  
6.68  
6.67  
6.56  
6.56  
6.55  
6.54  
6.53  
6.51

4.11  
4.10  
4.08

3.50  
3.26  
3.26  
3.24

2.81  
2.78  
2.76

1.23  
1.22  
1.21  
1.21  
1.18  
1.17

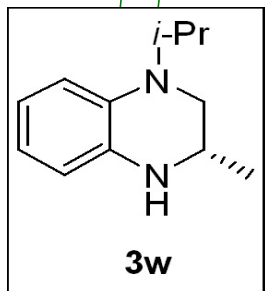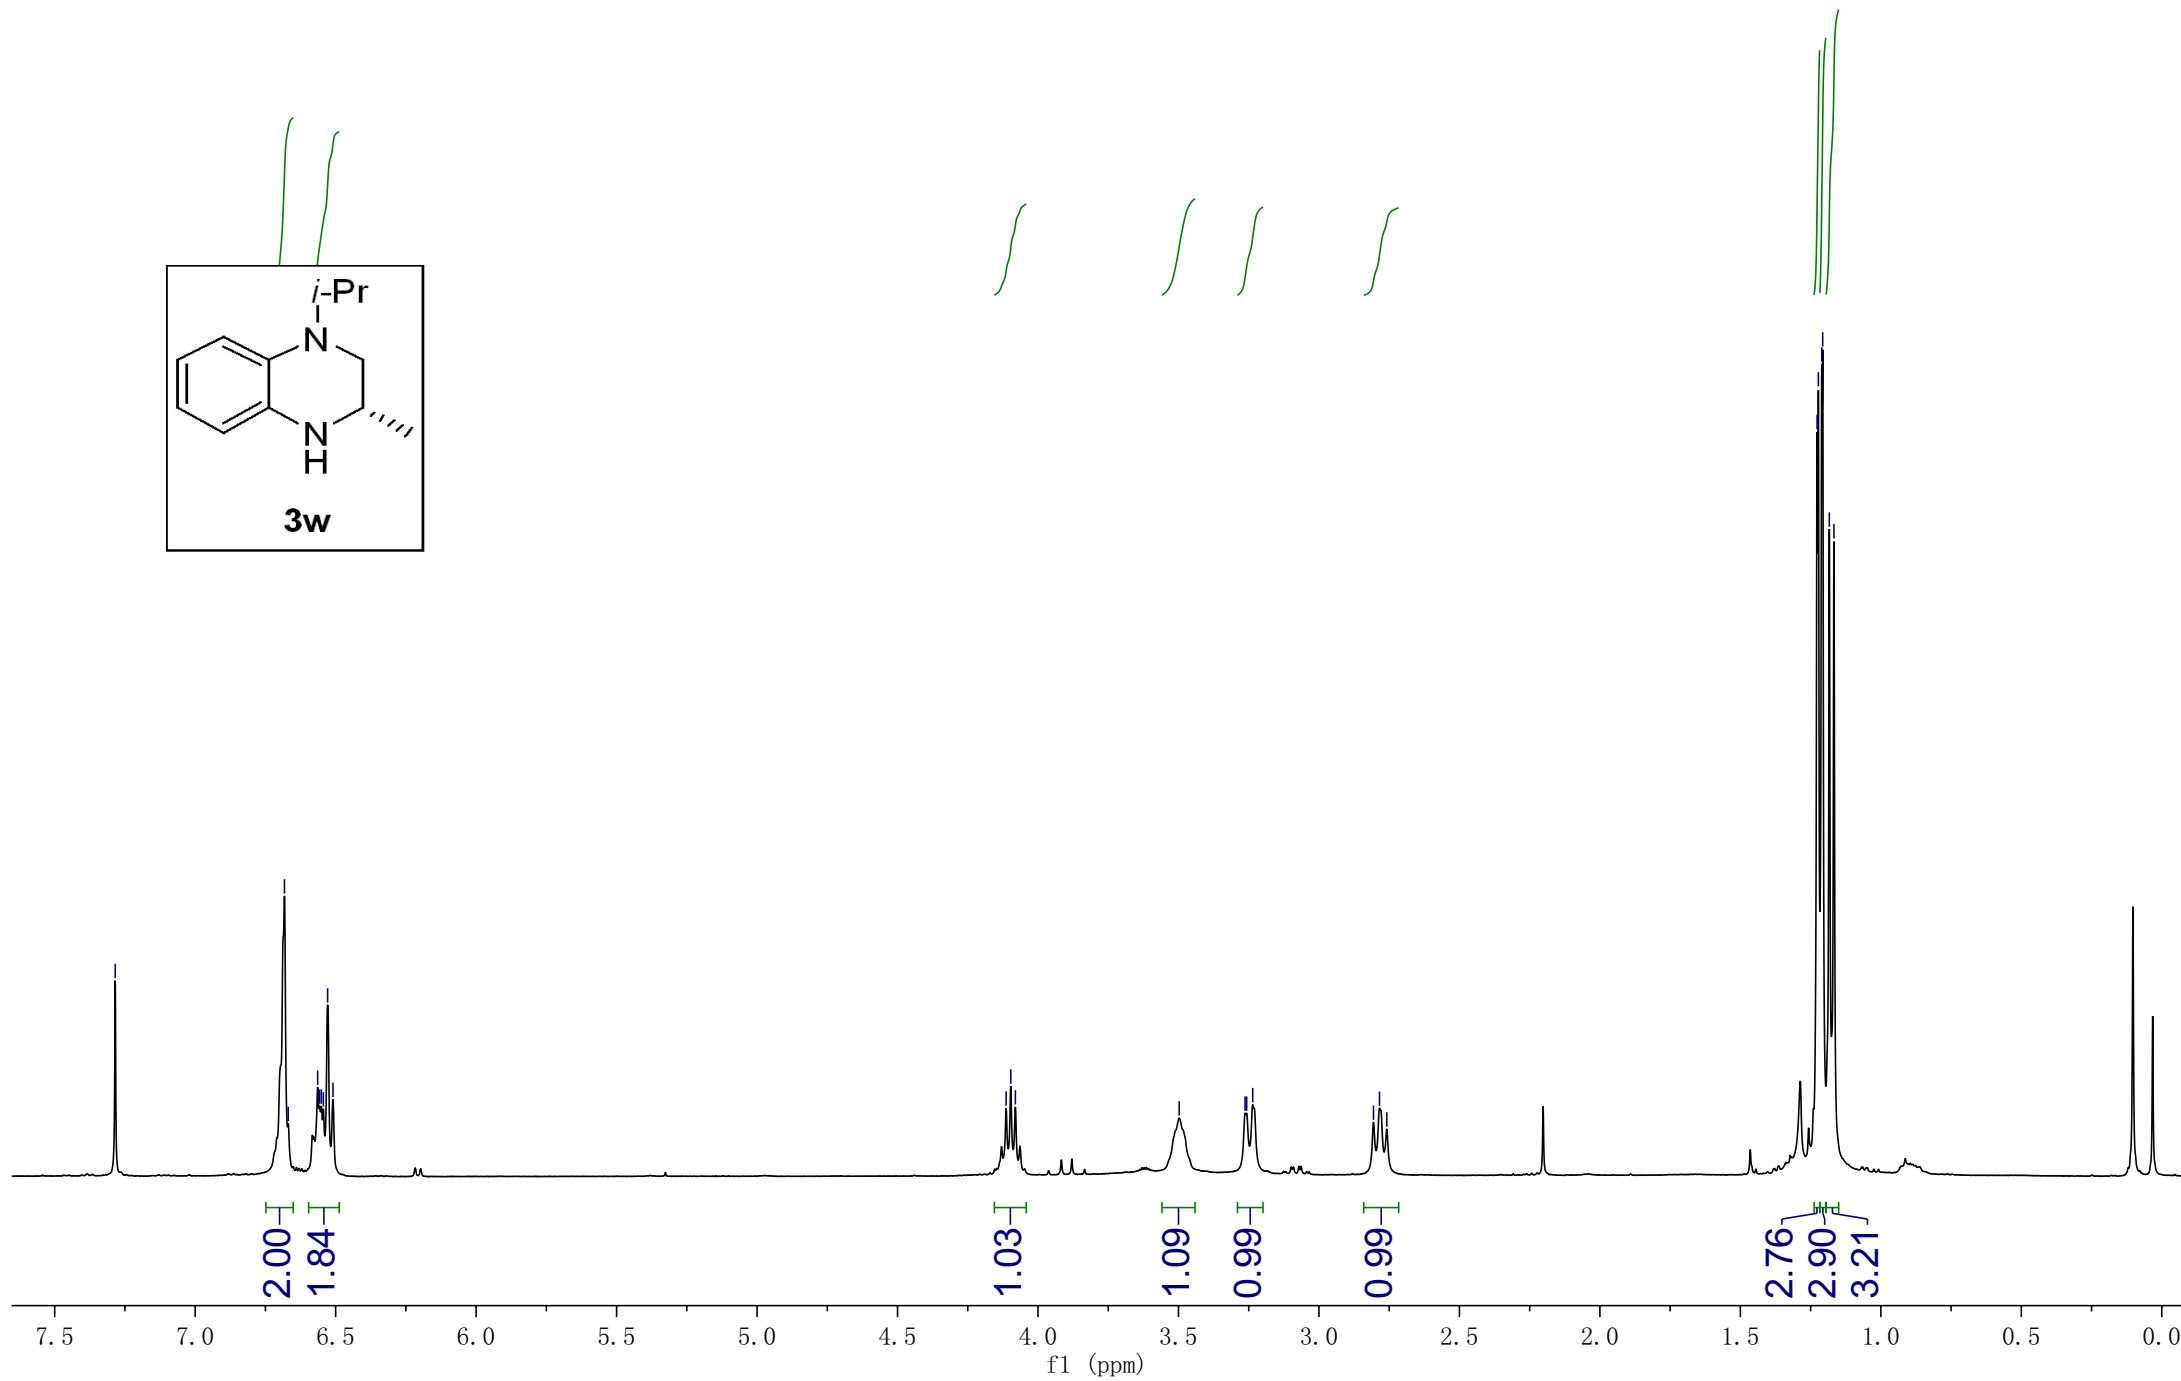

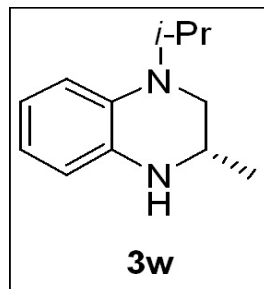

134.49  
134.34

118.86  
117.03  
113.99  
111.06

46.38  
45.85

20.32  
19.29  
17.88

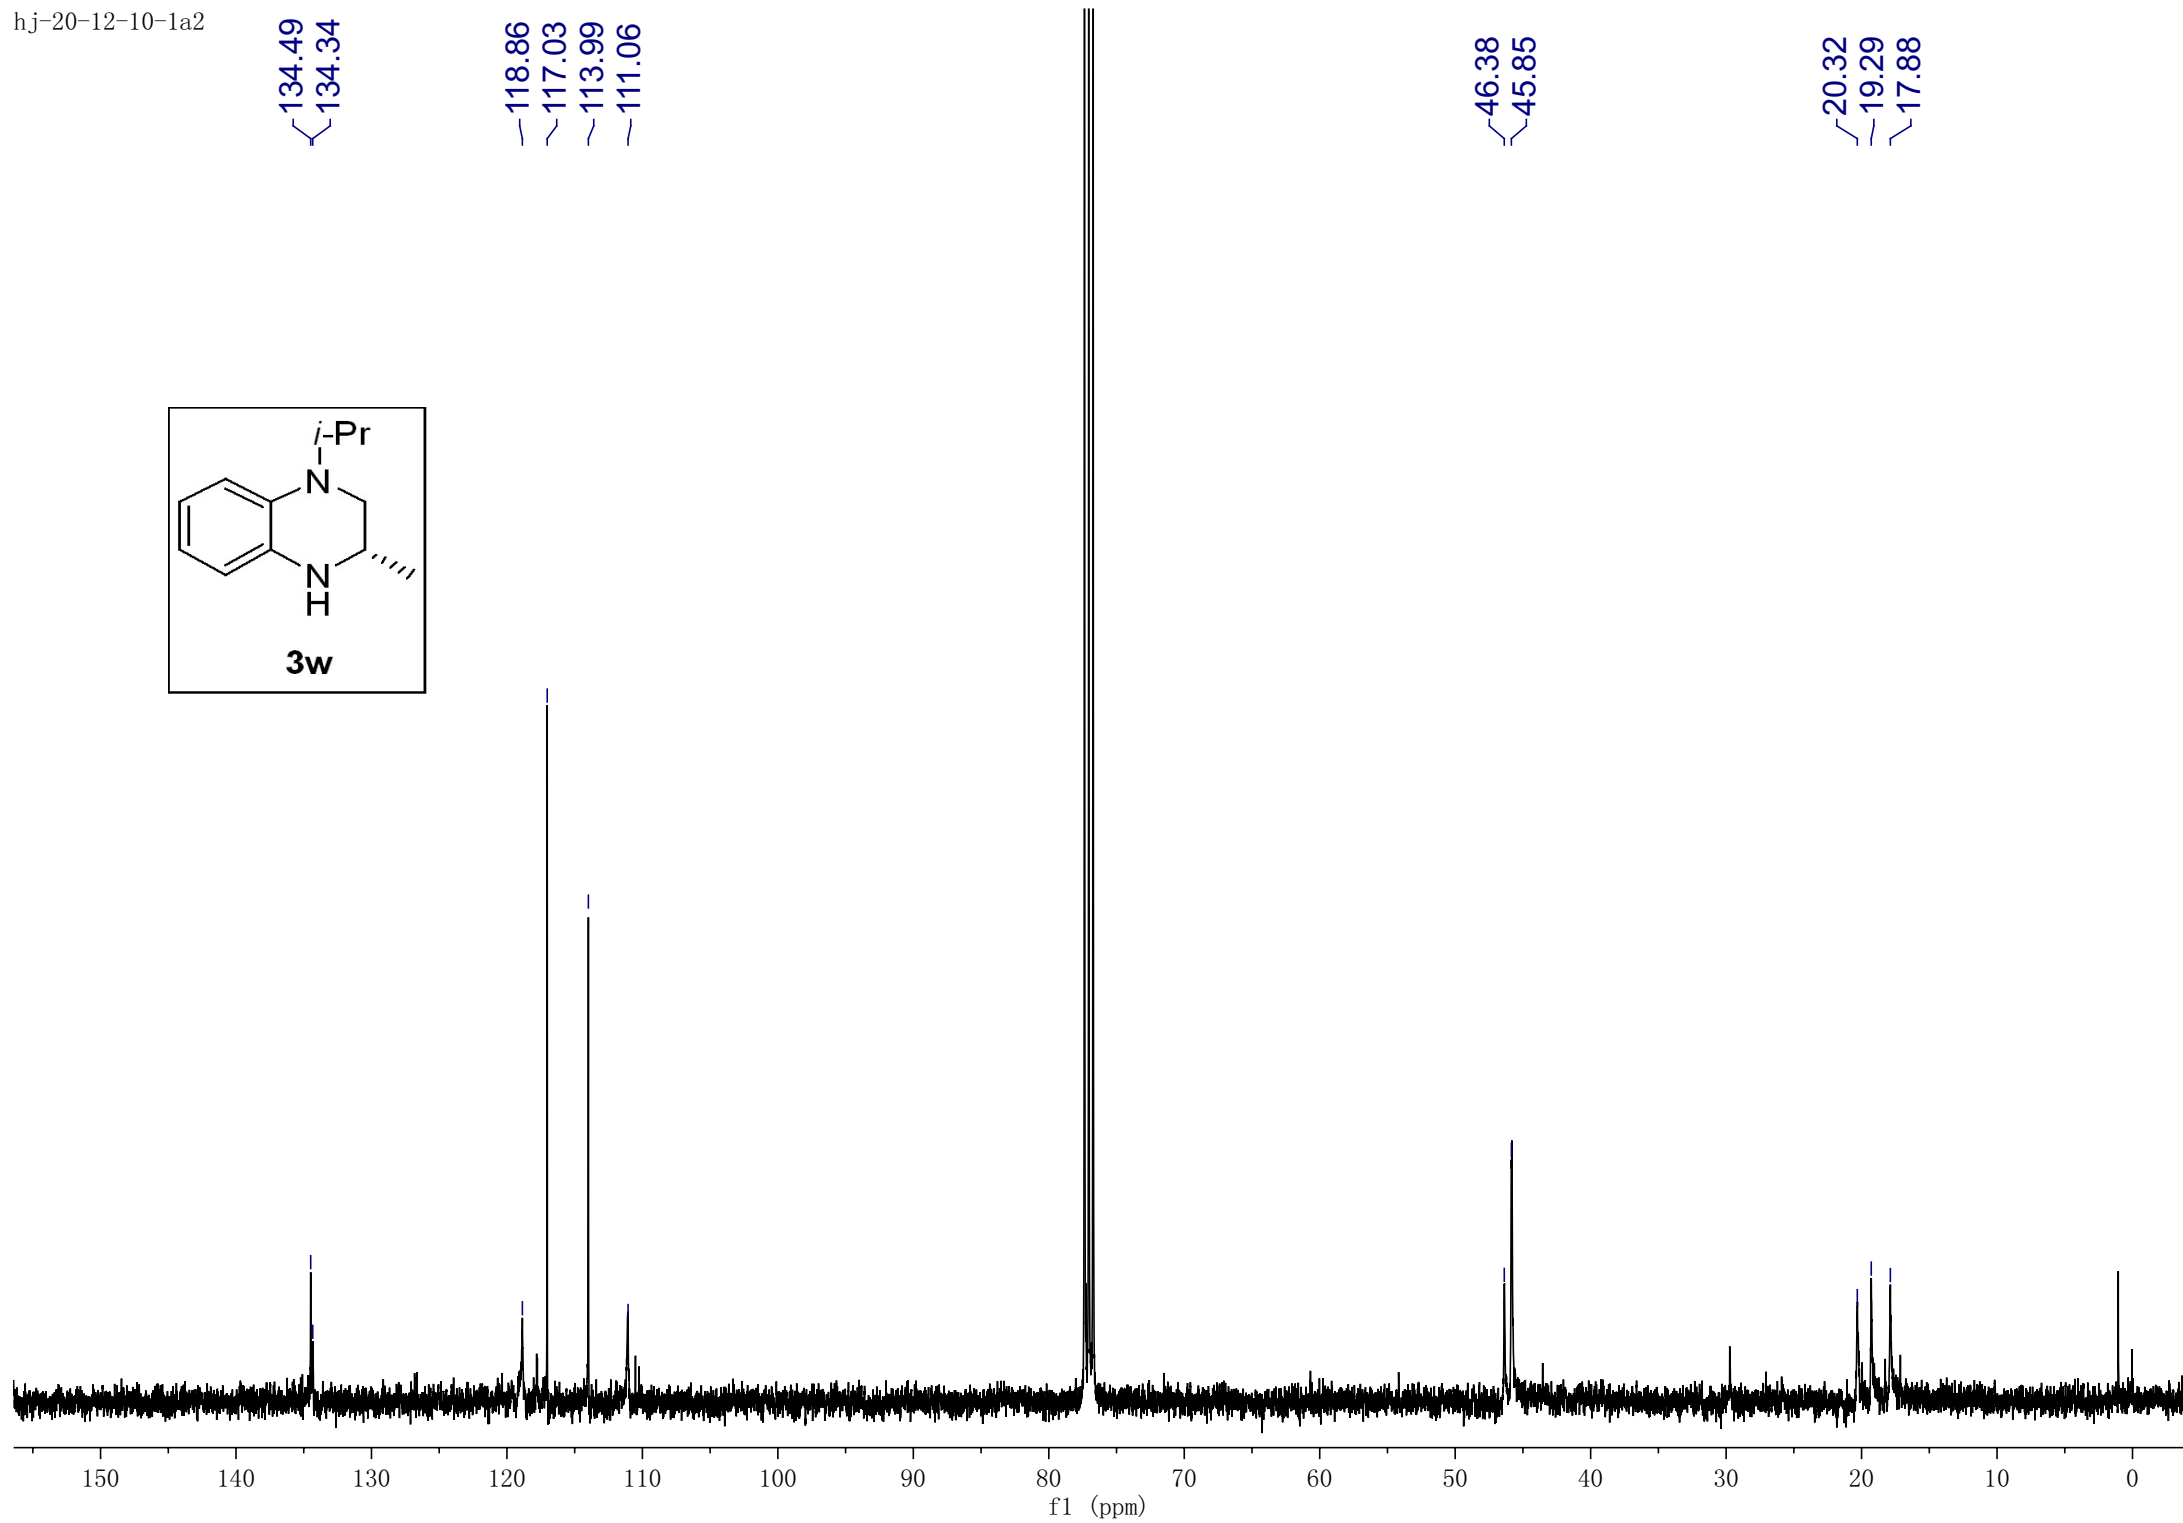

hj-20-12-5-6

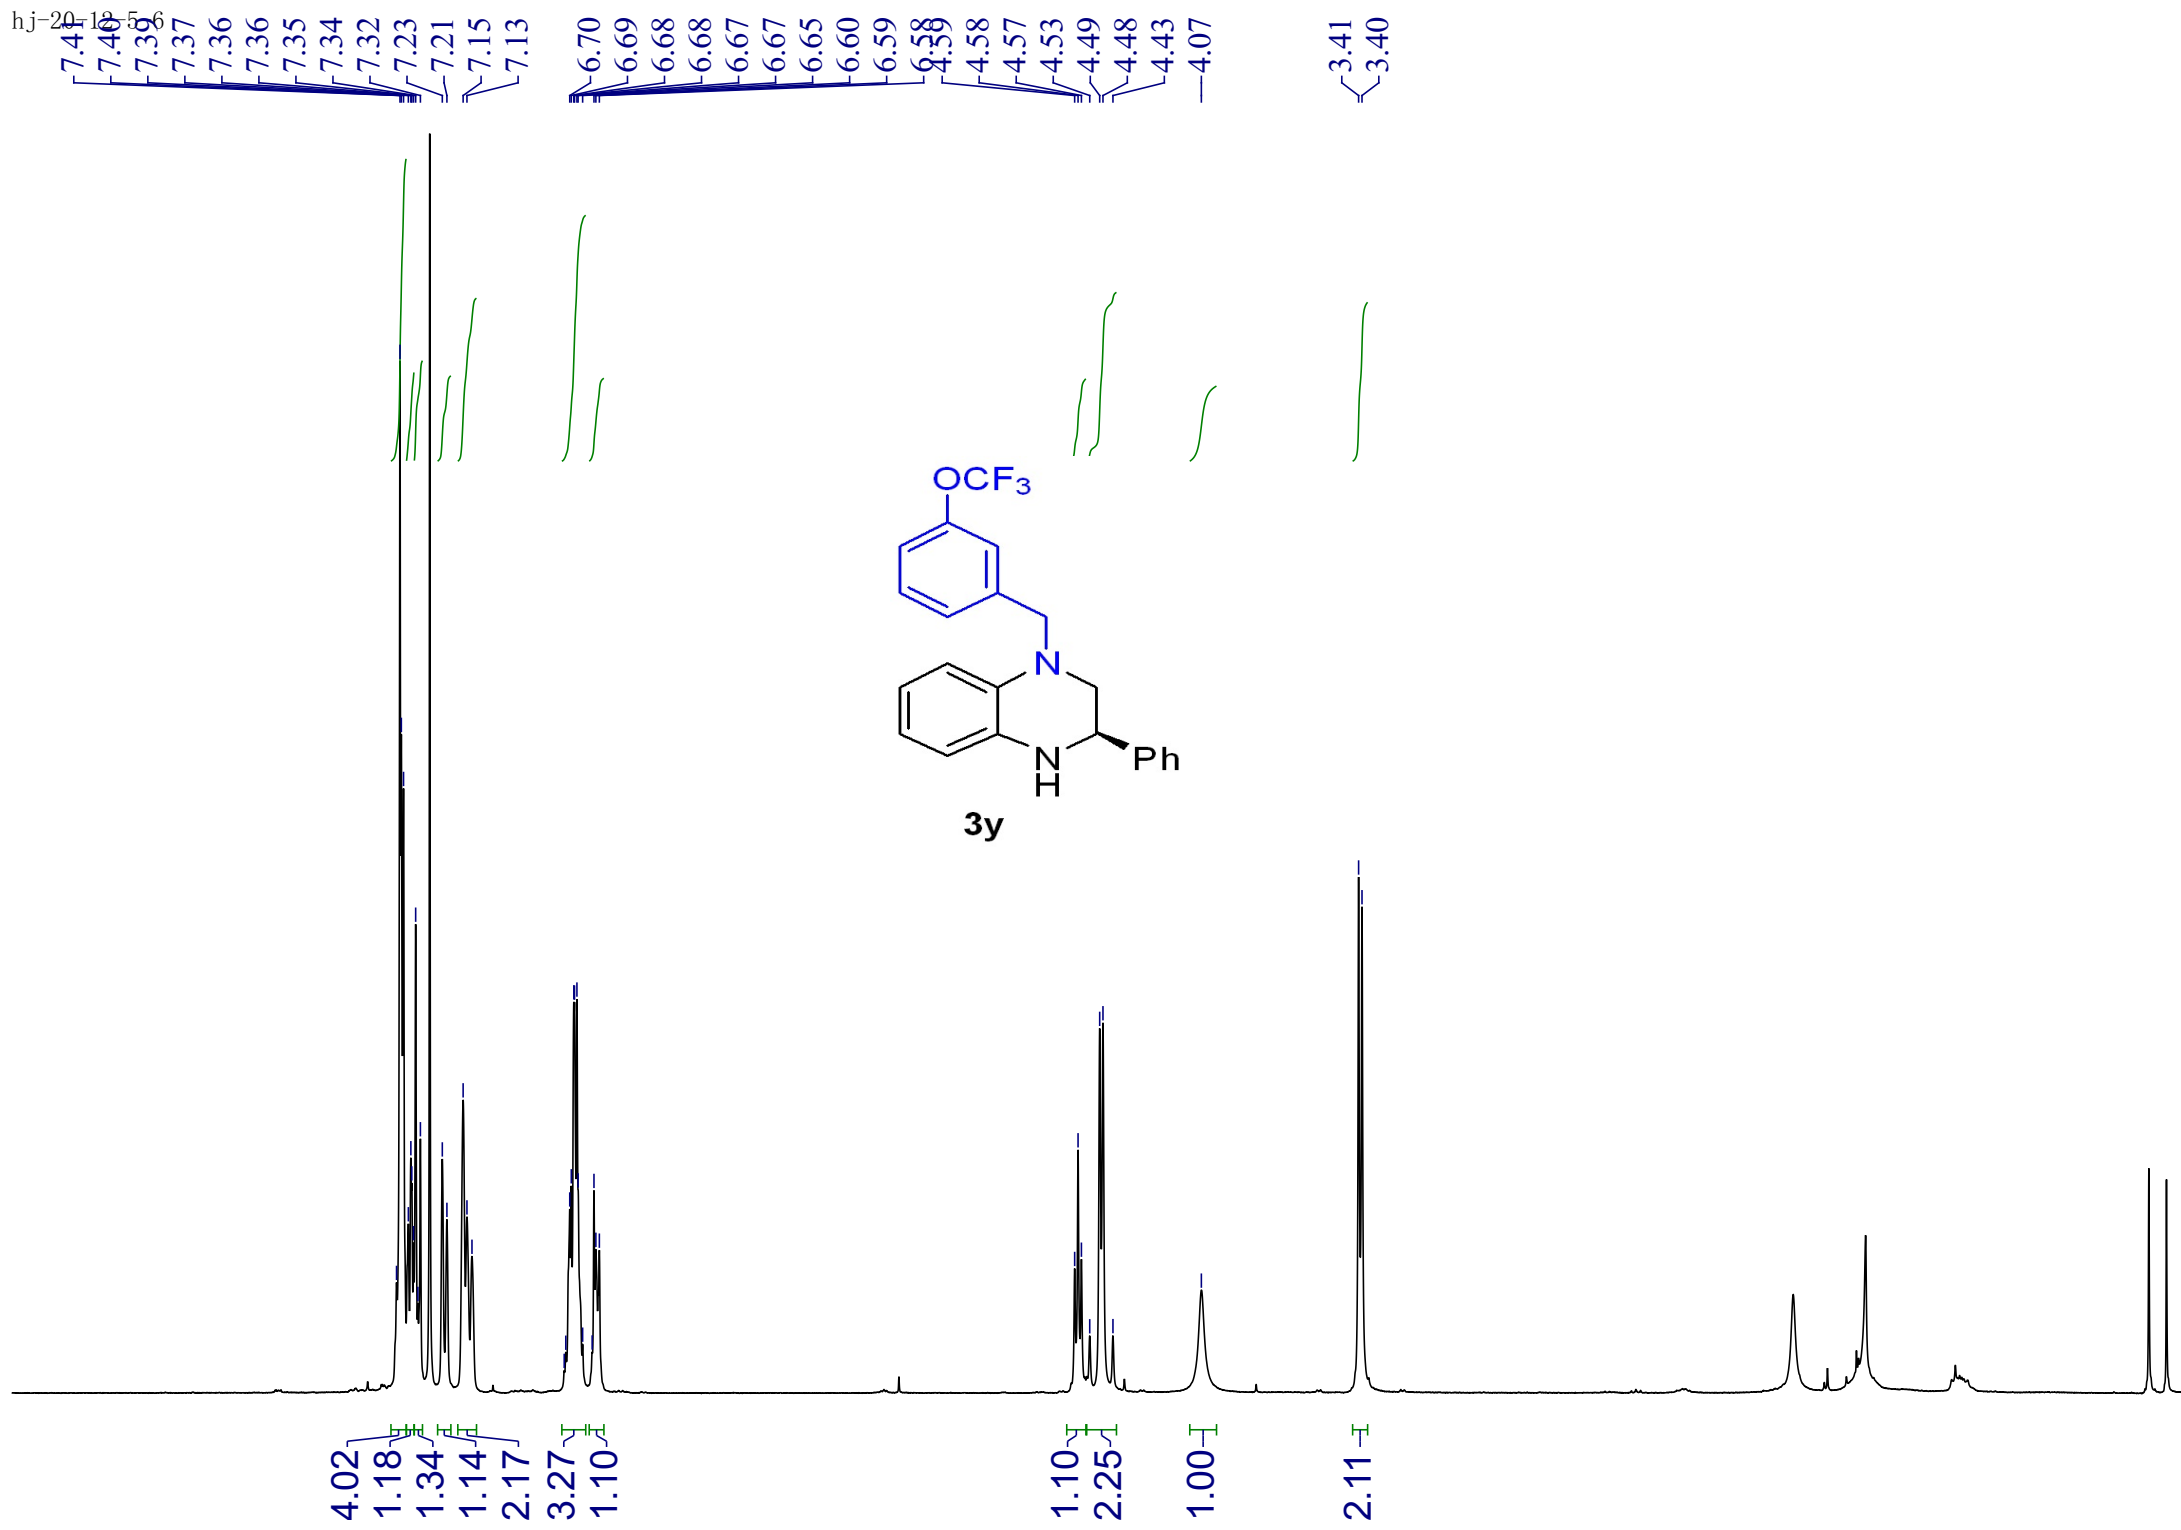

hj-20-12-5-6

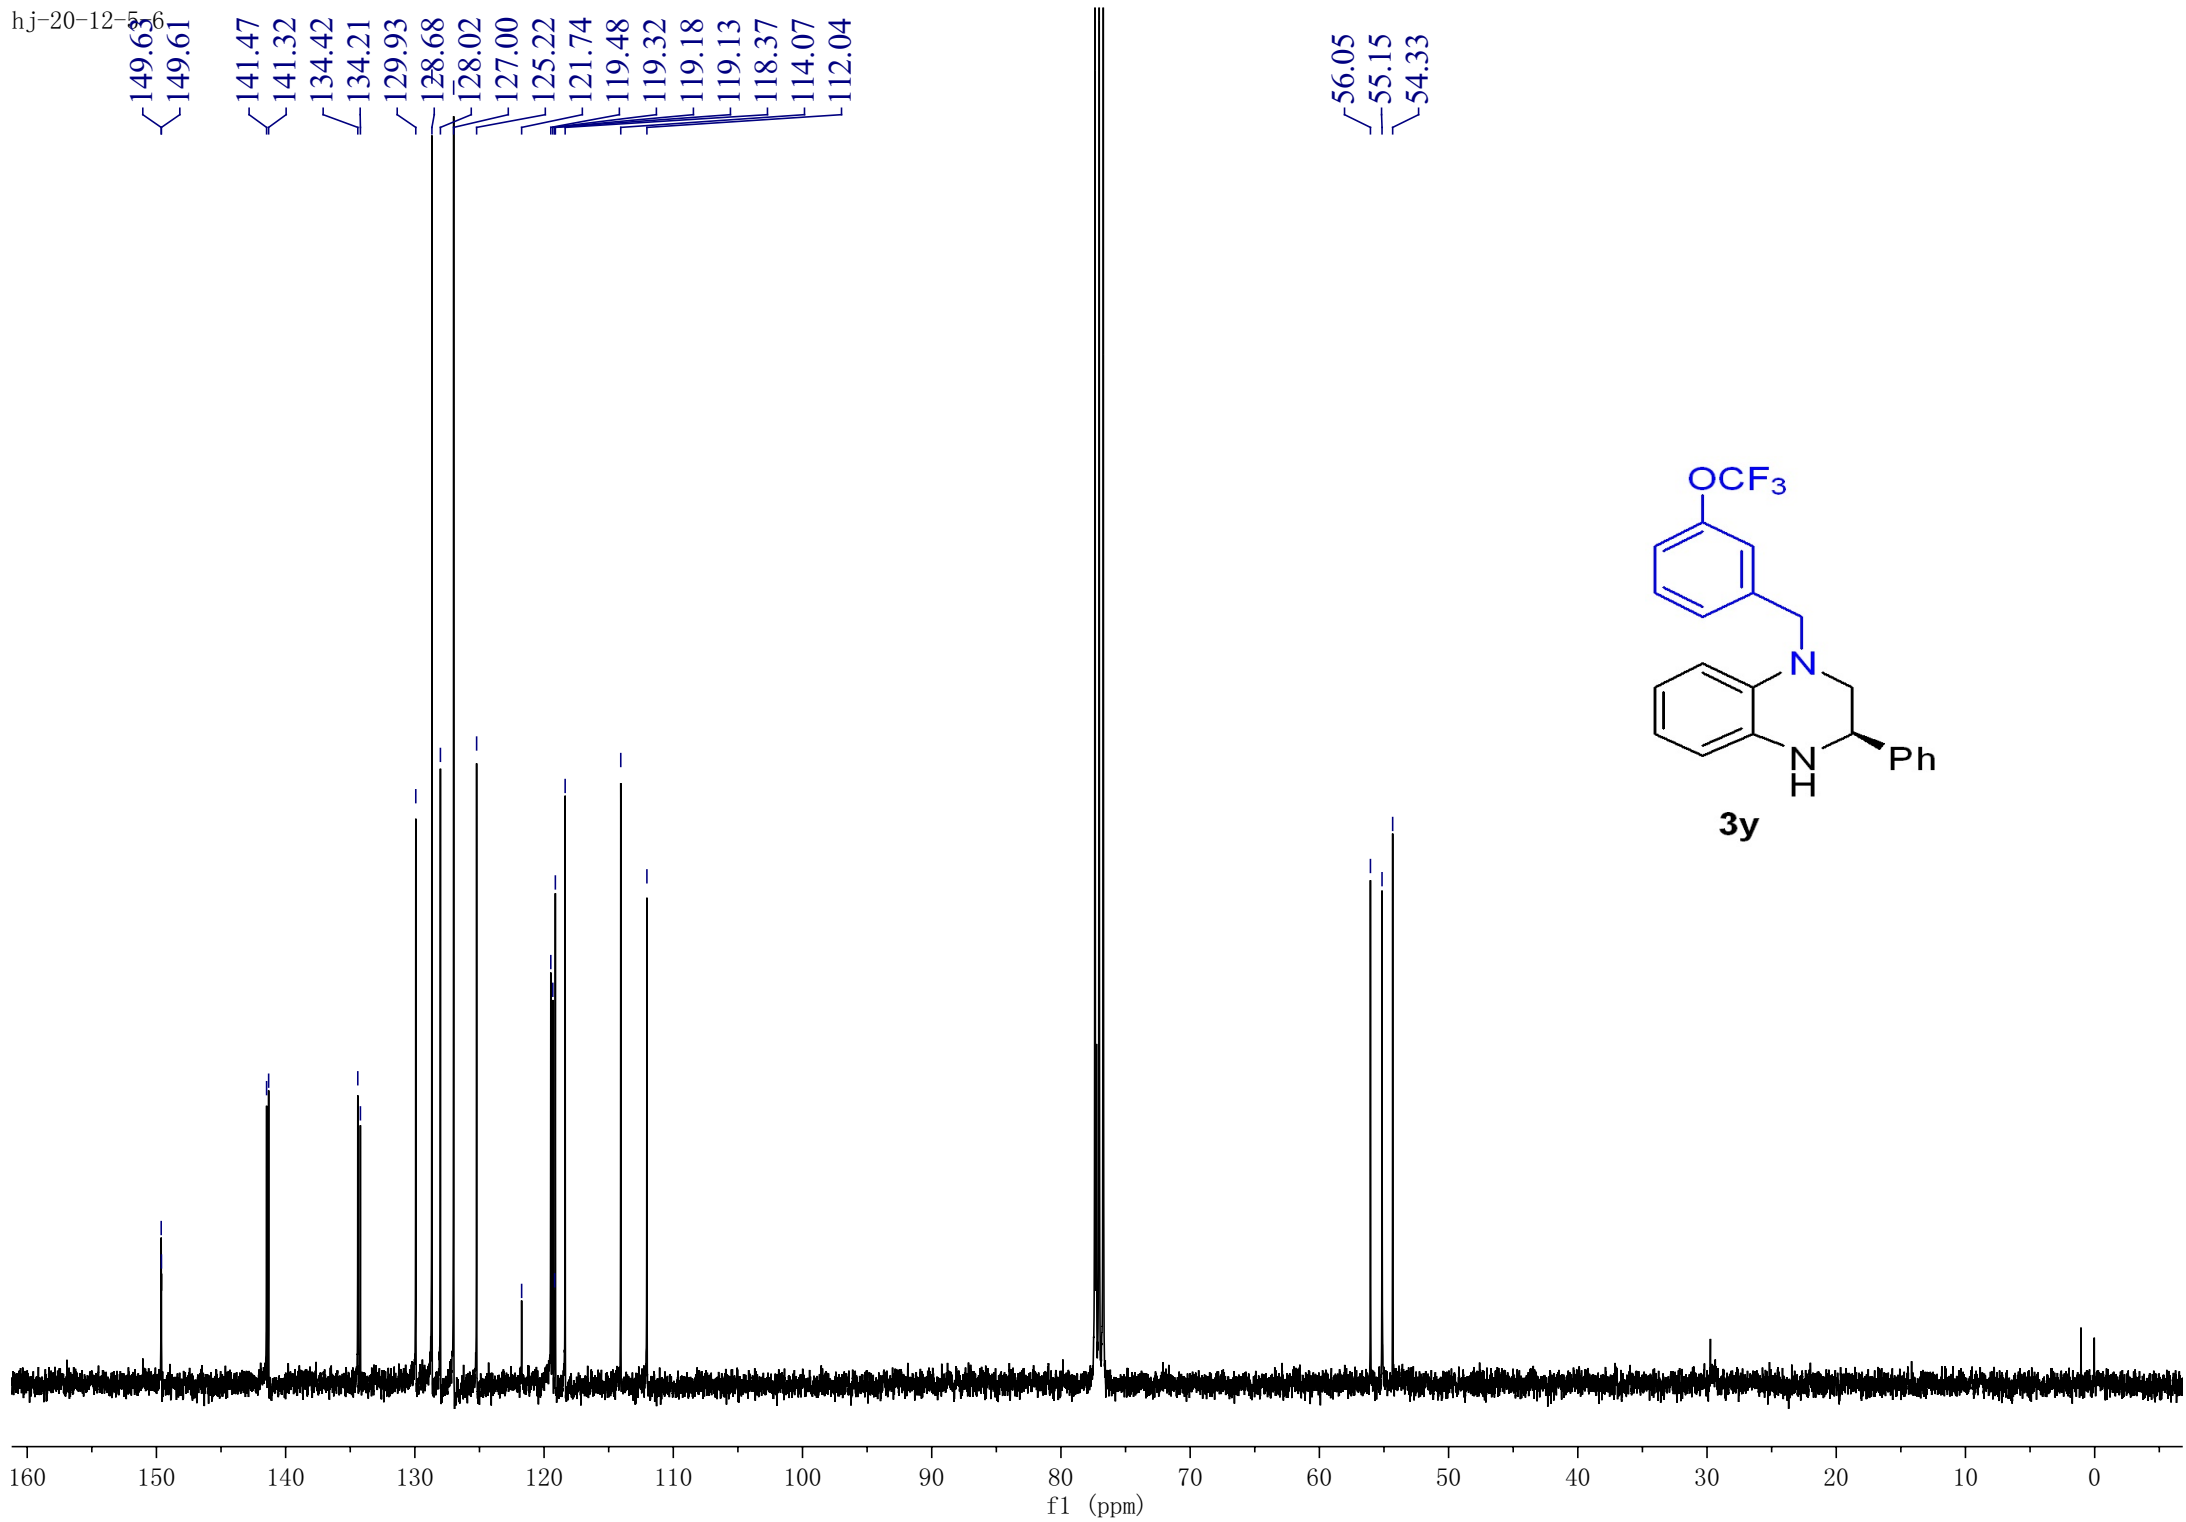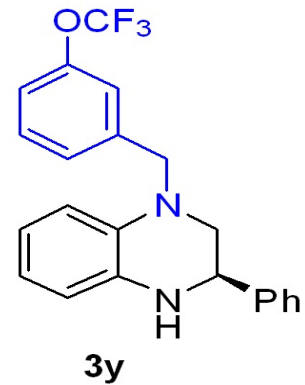

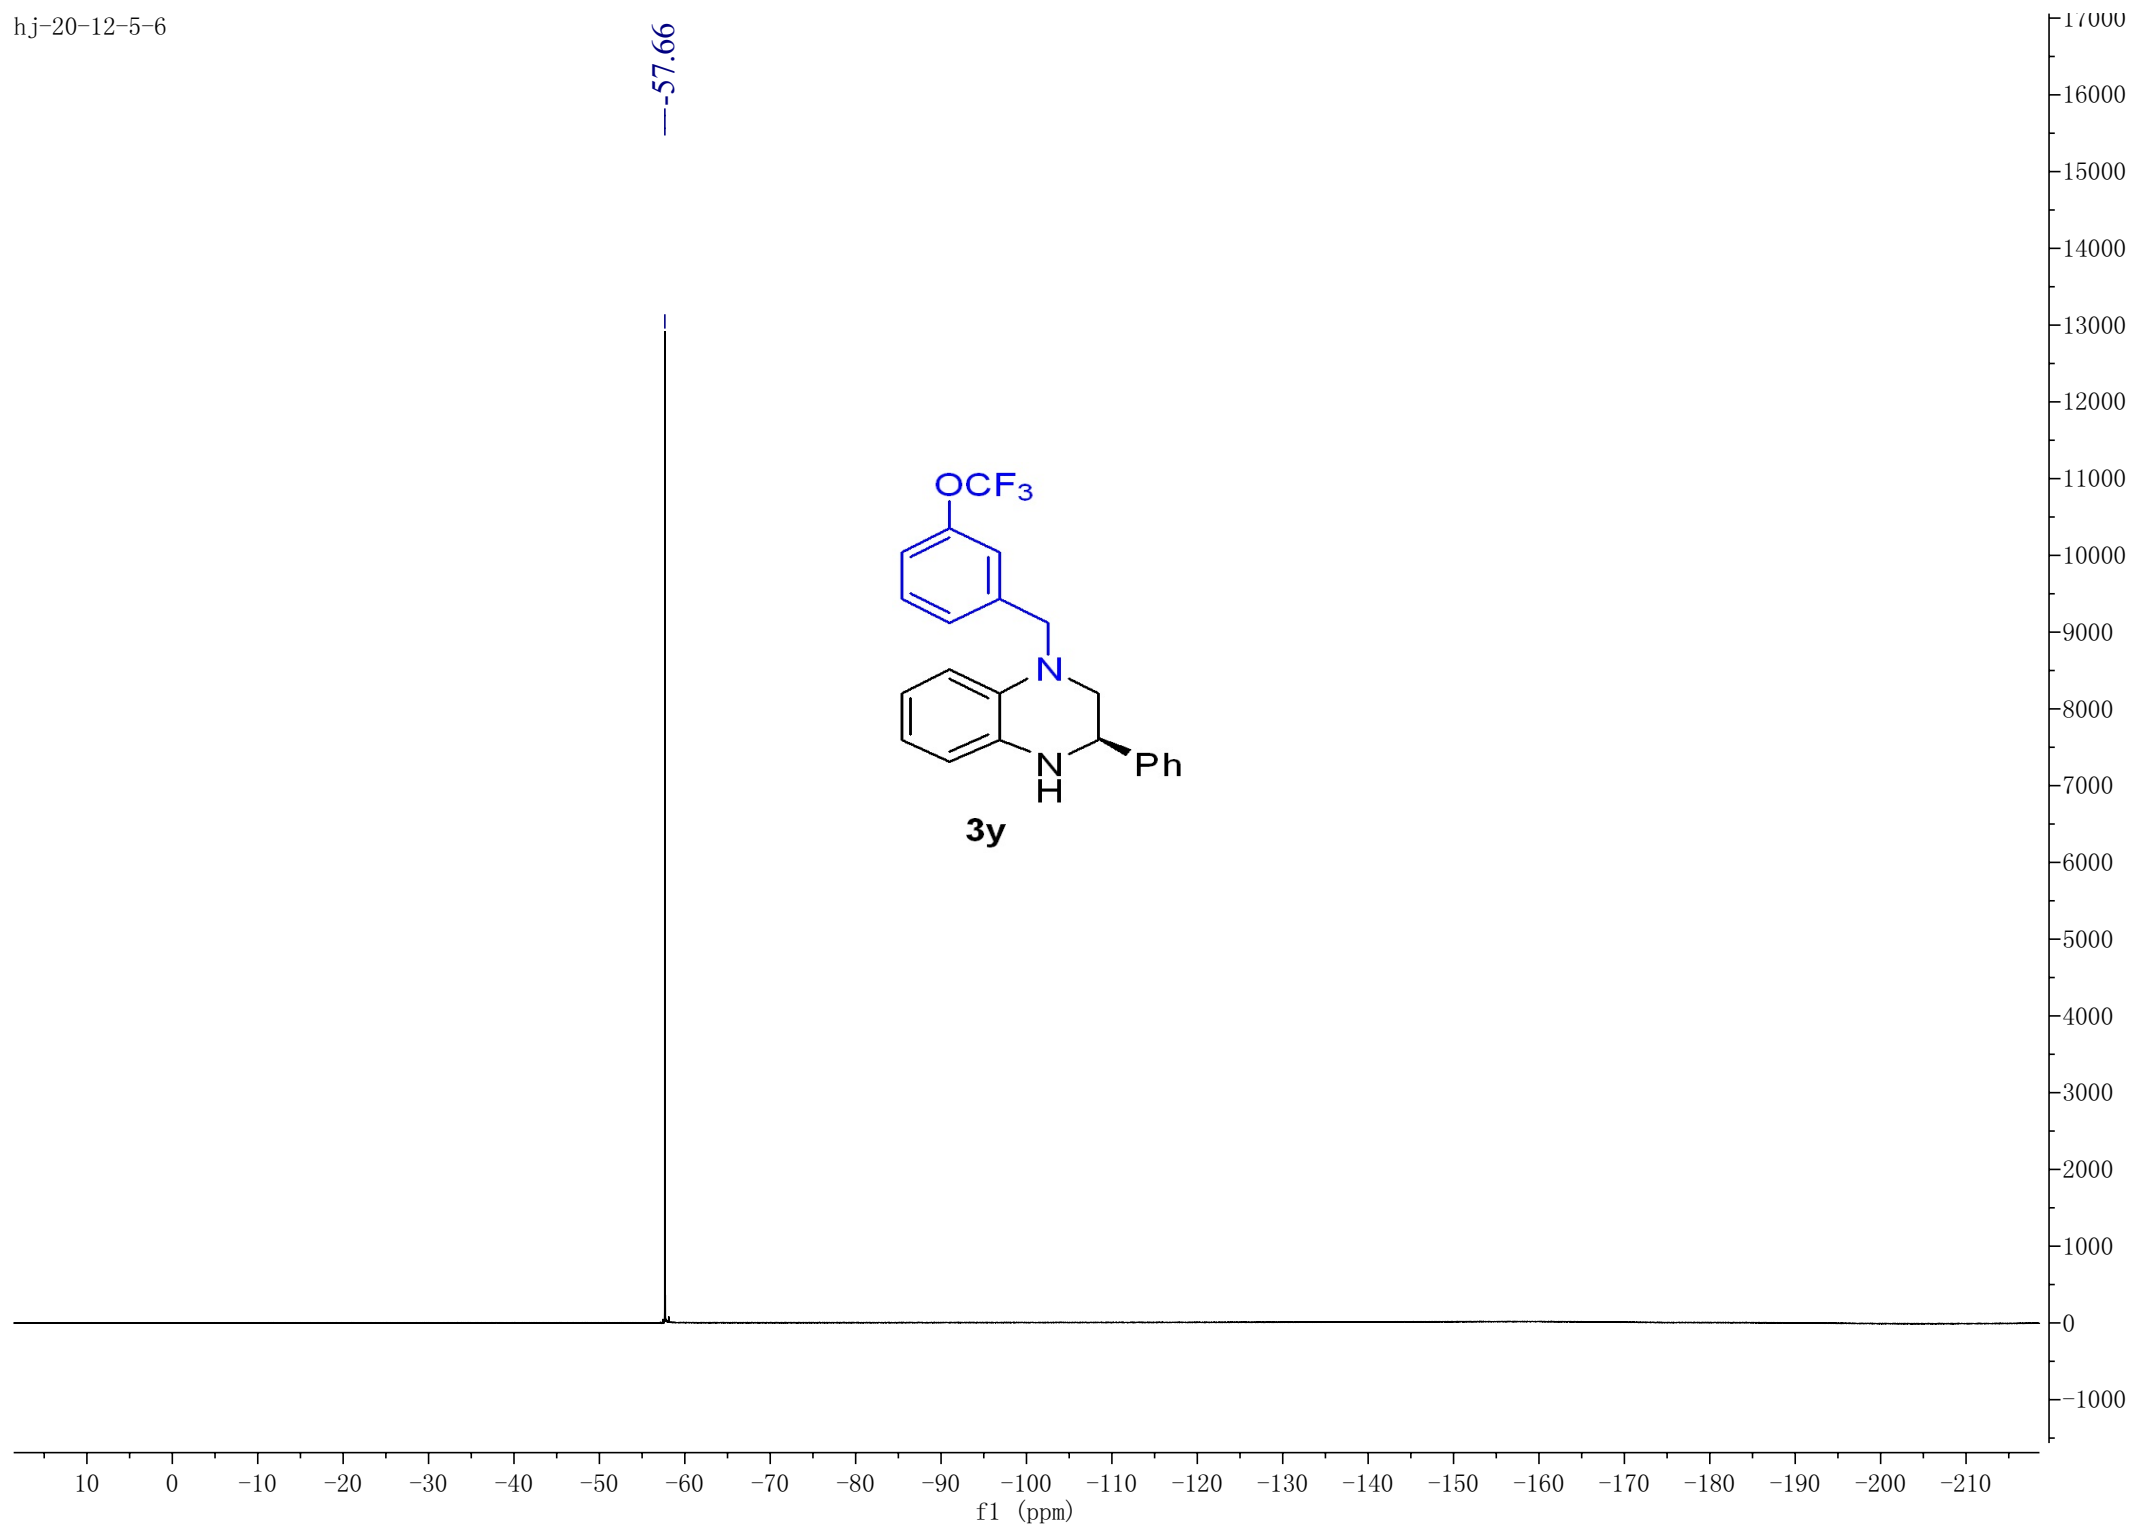

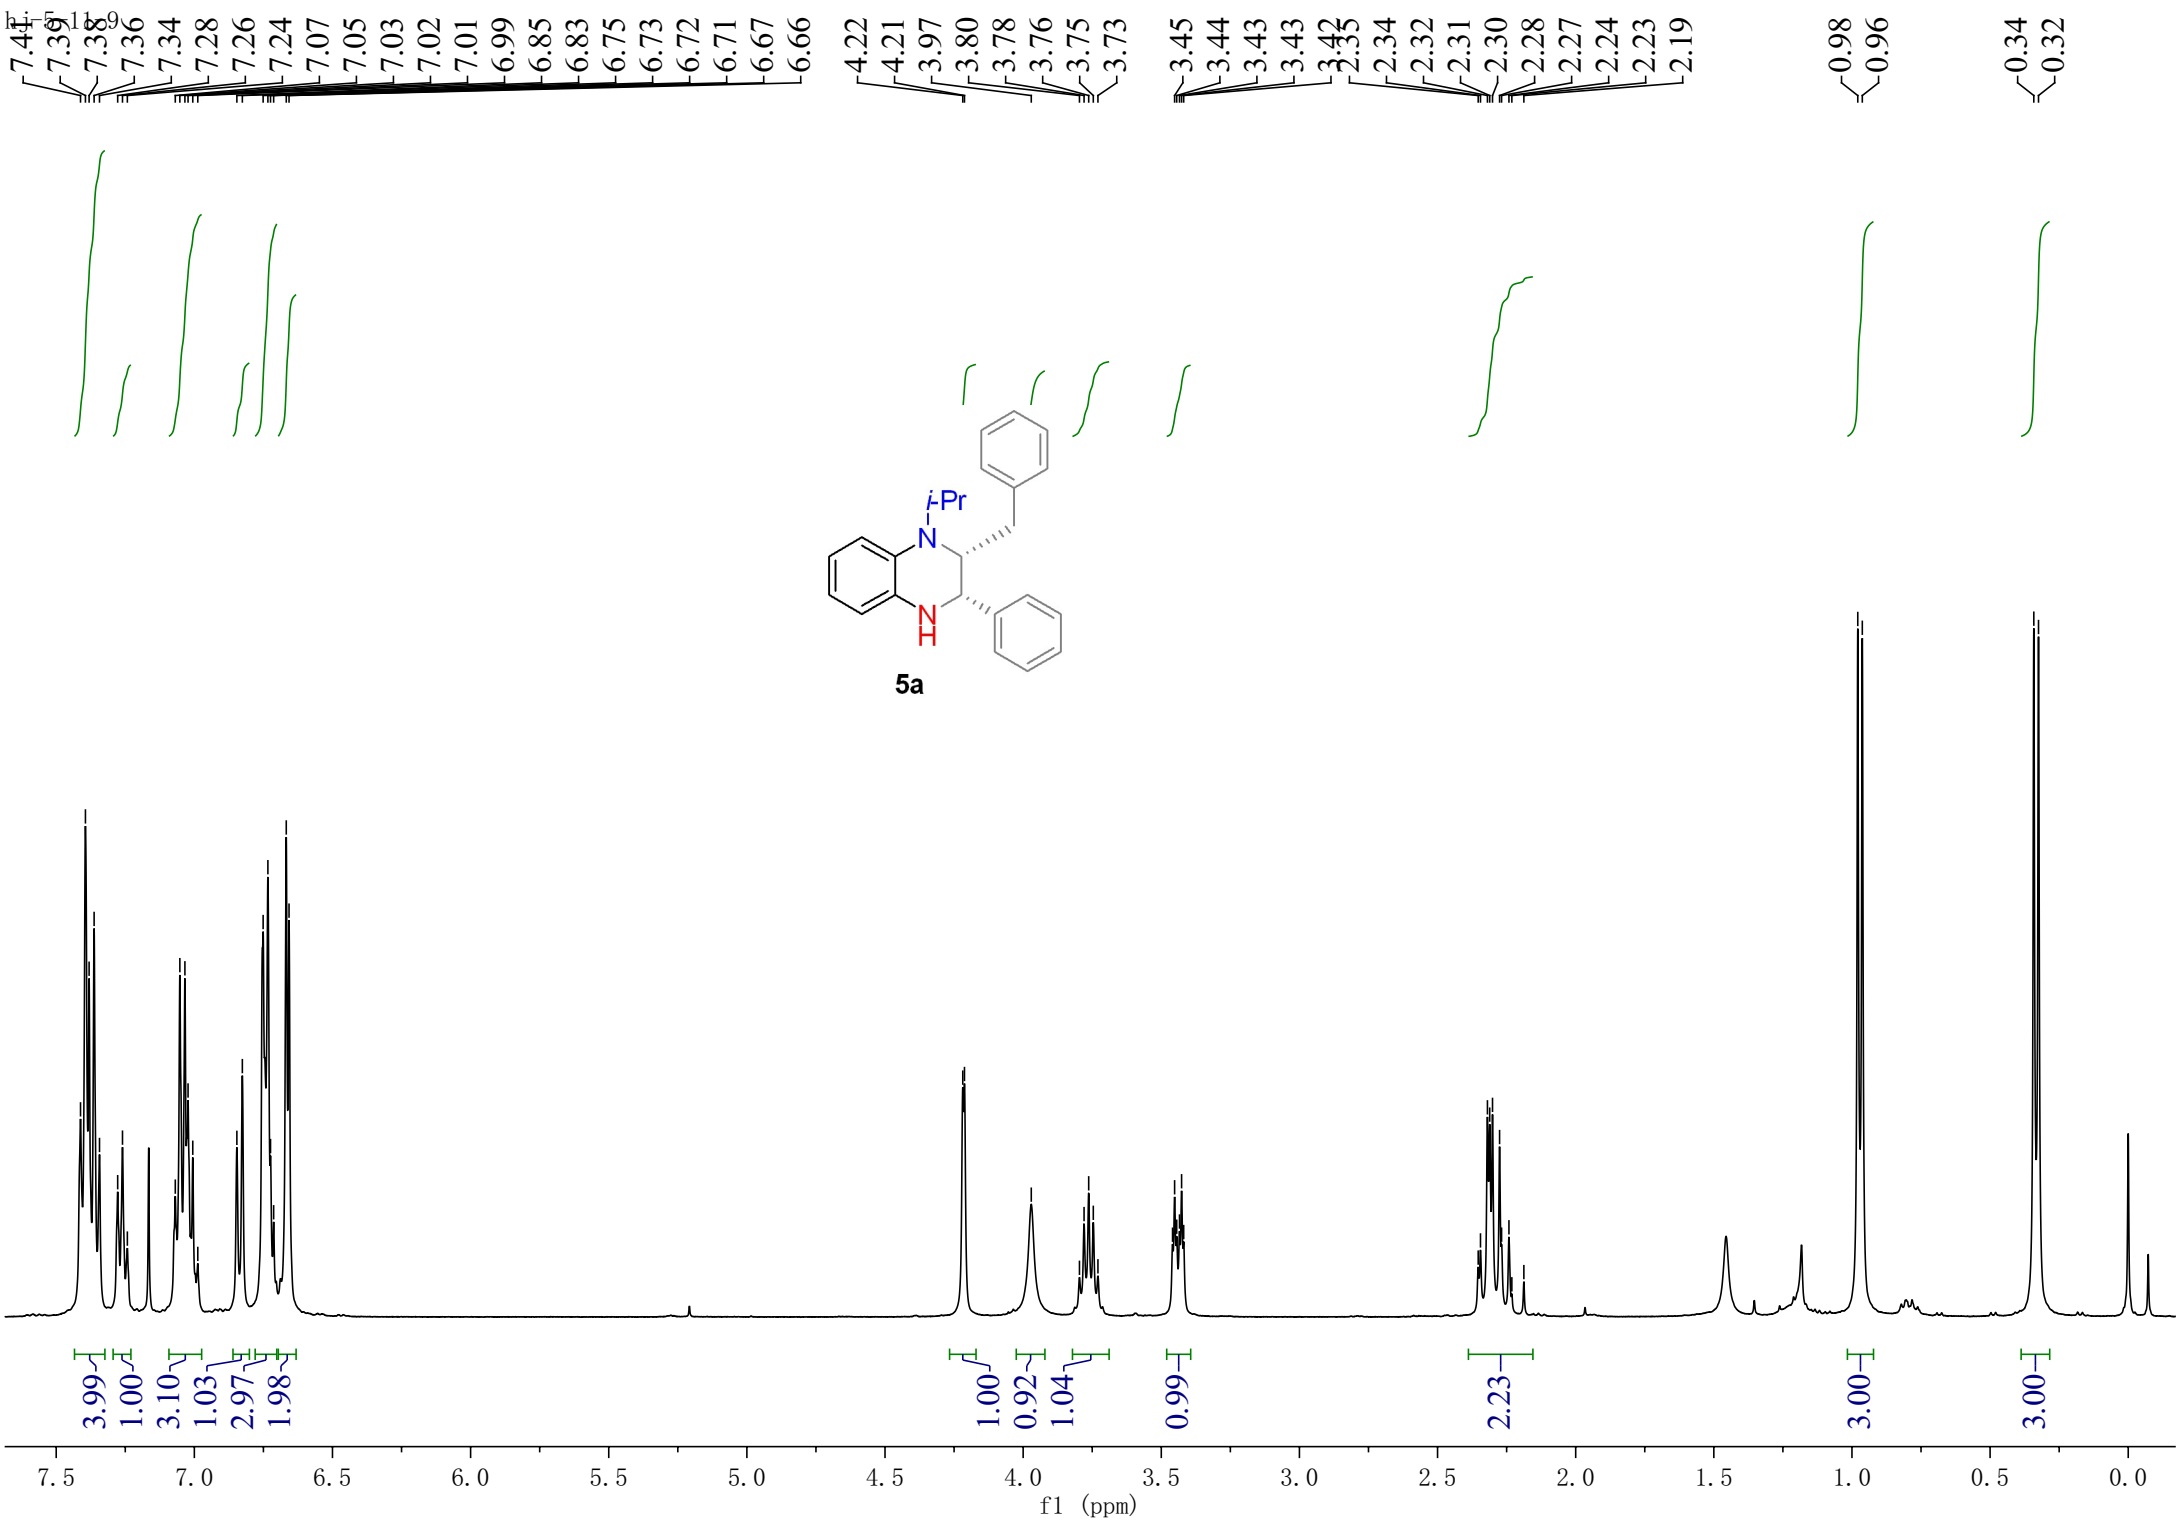

141.50  
140.69  
130.08  
128.67  
127.64  
127.40  
126.76  
125.56  
119.35  
118.71  
118.65  
115.17

58.33  
56.23  
53.57

32.92

20.83  
19.39

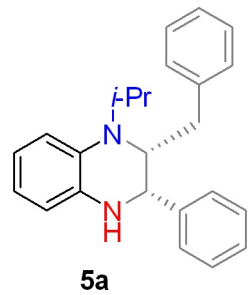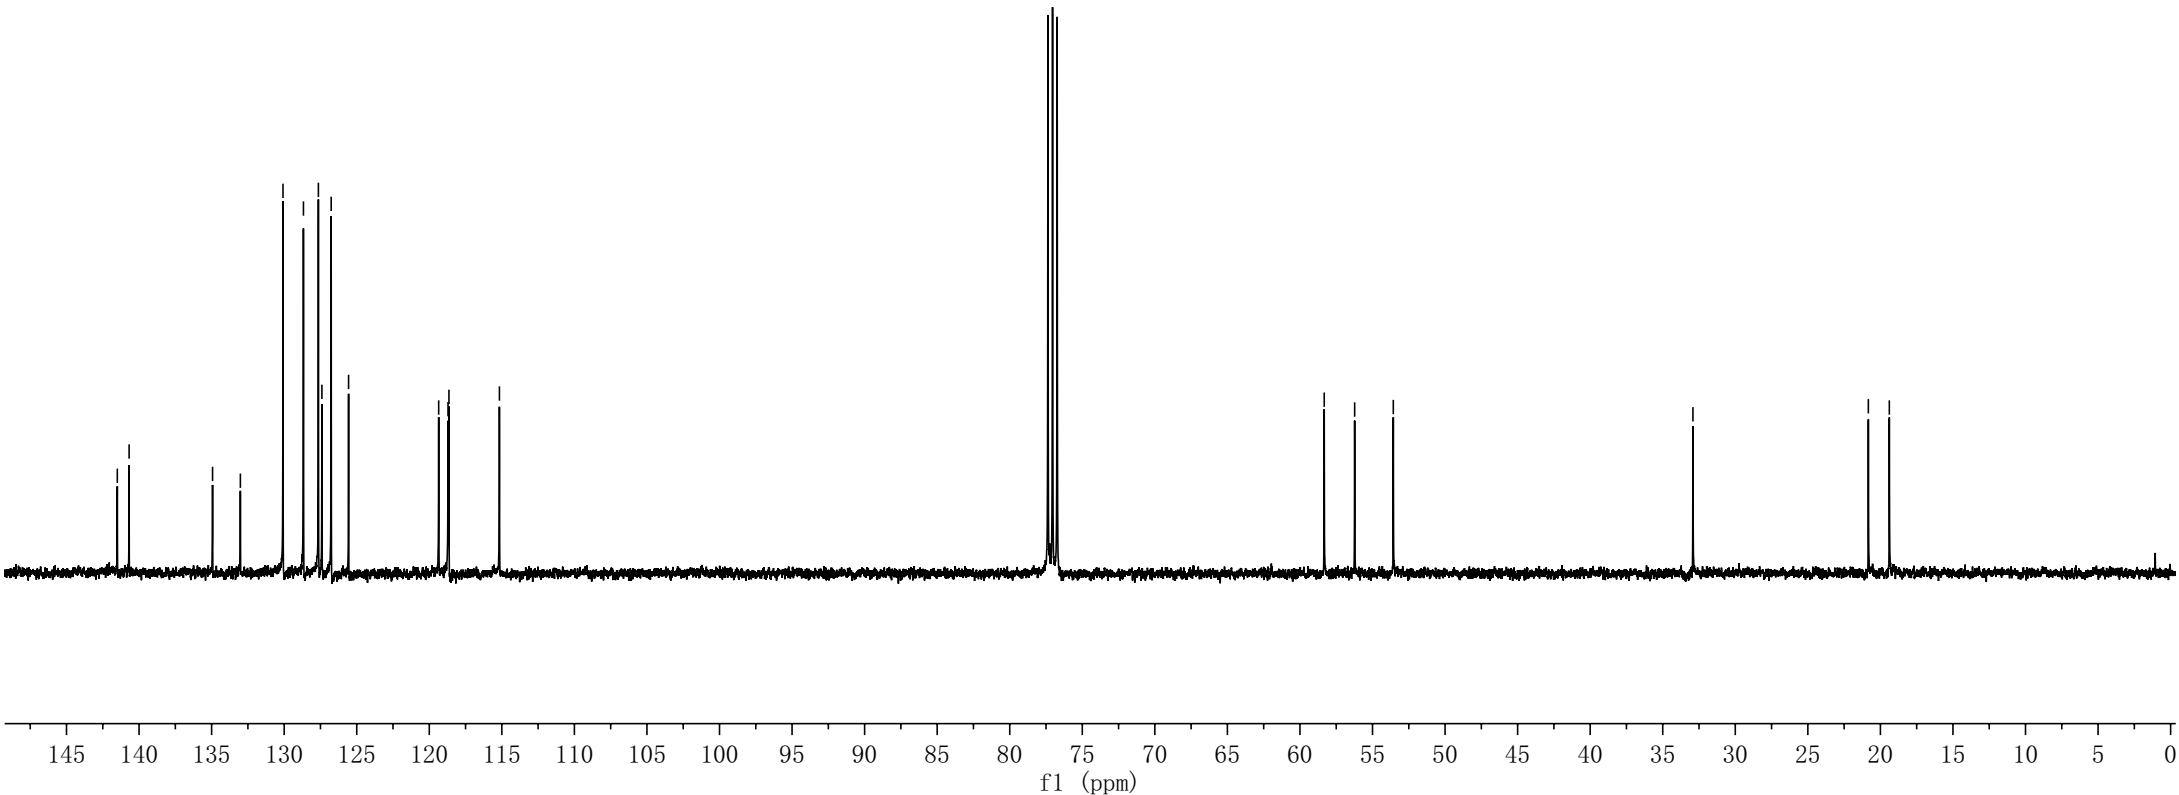

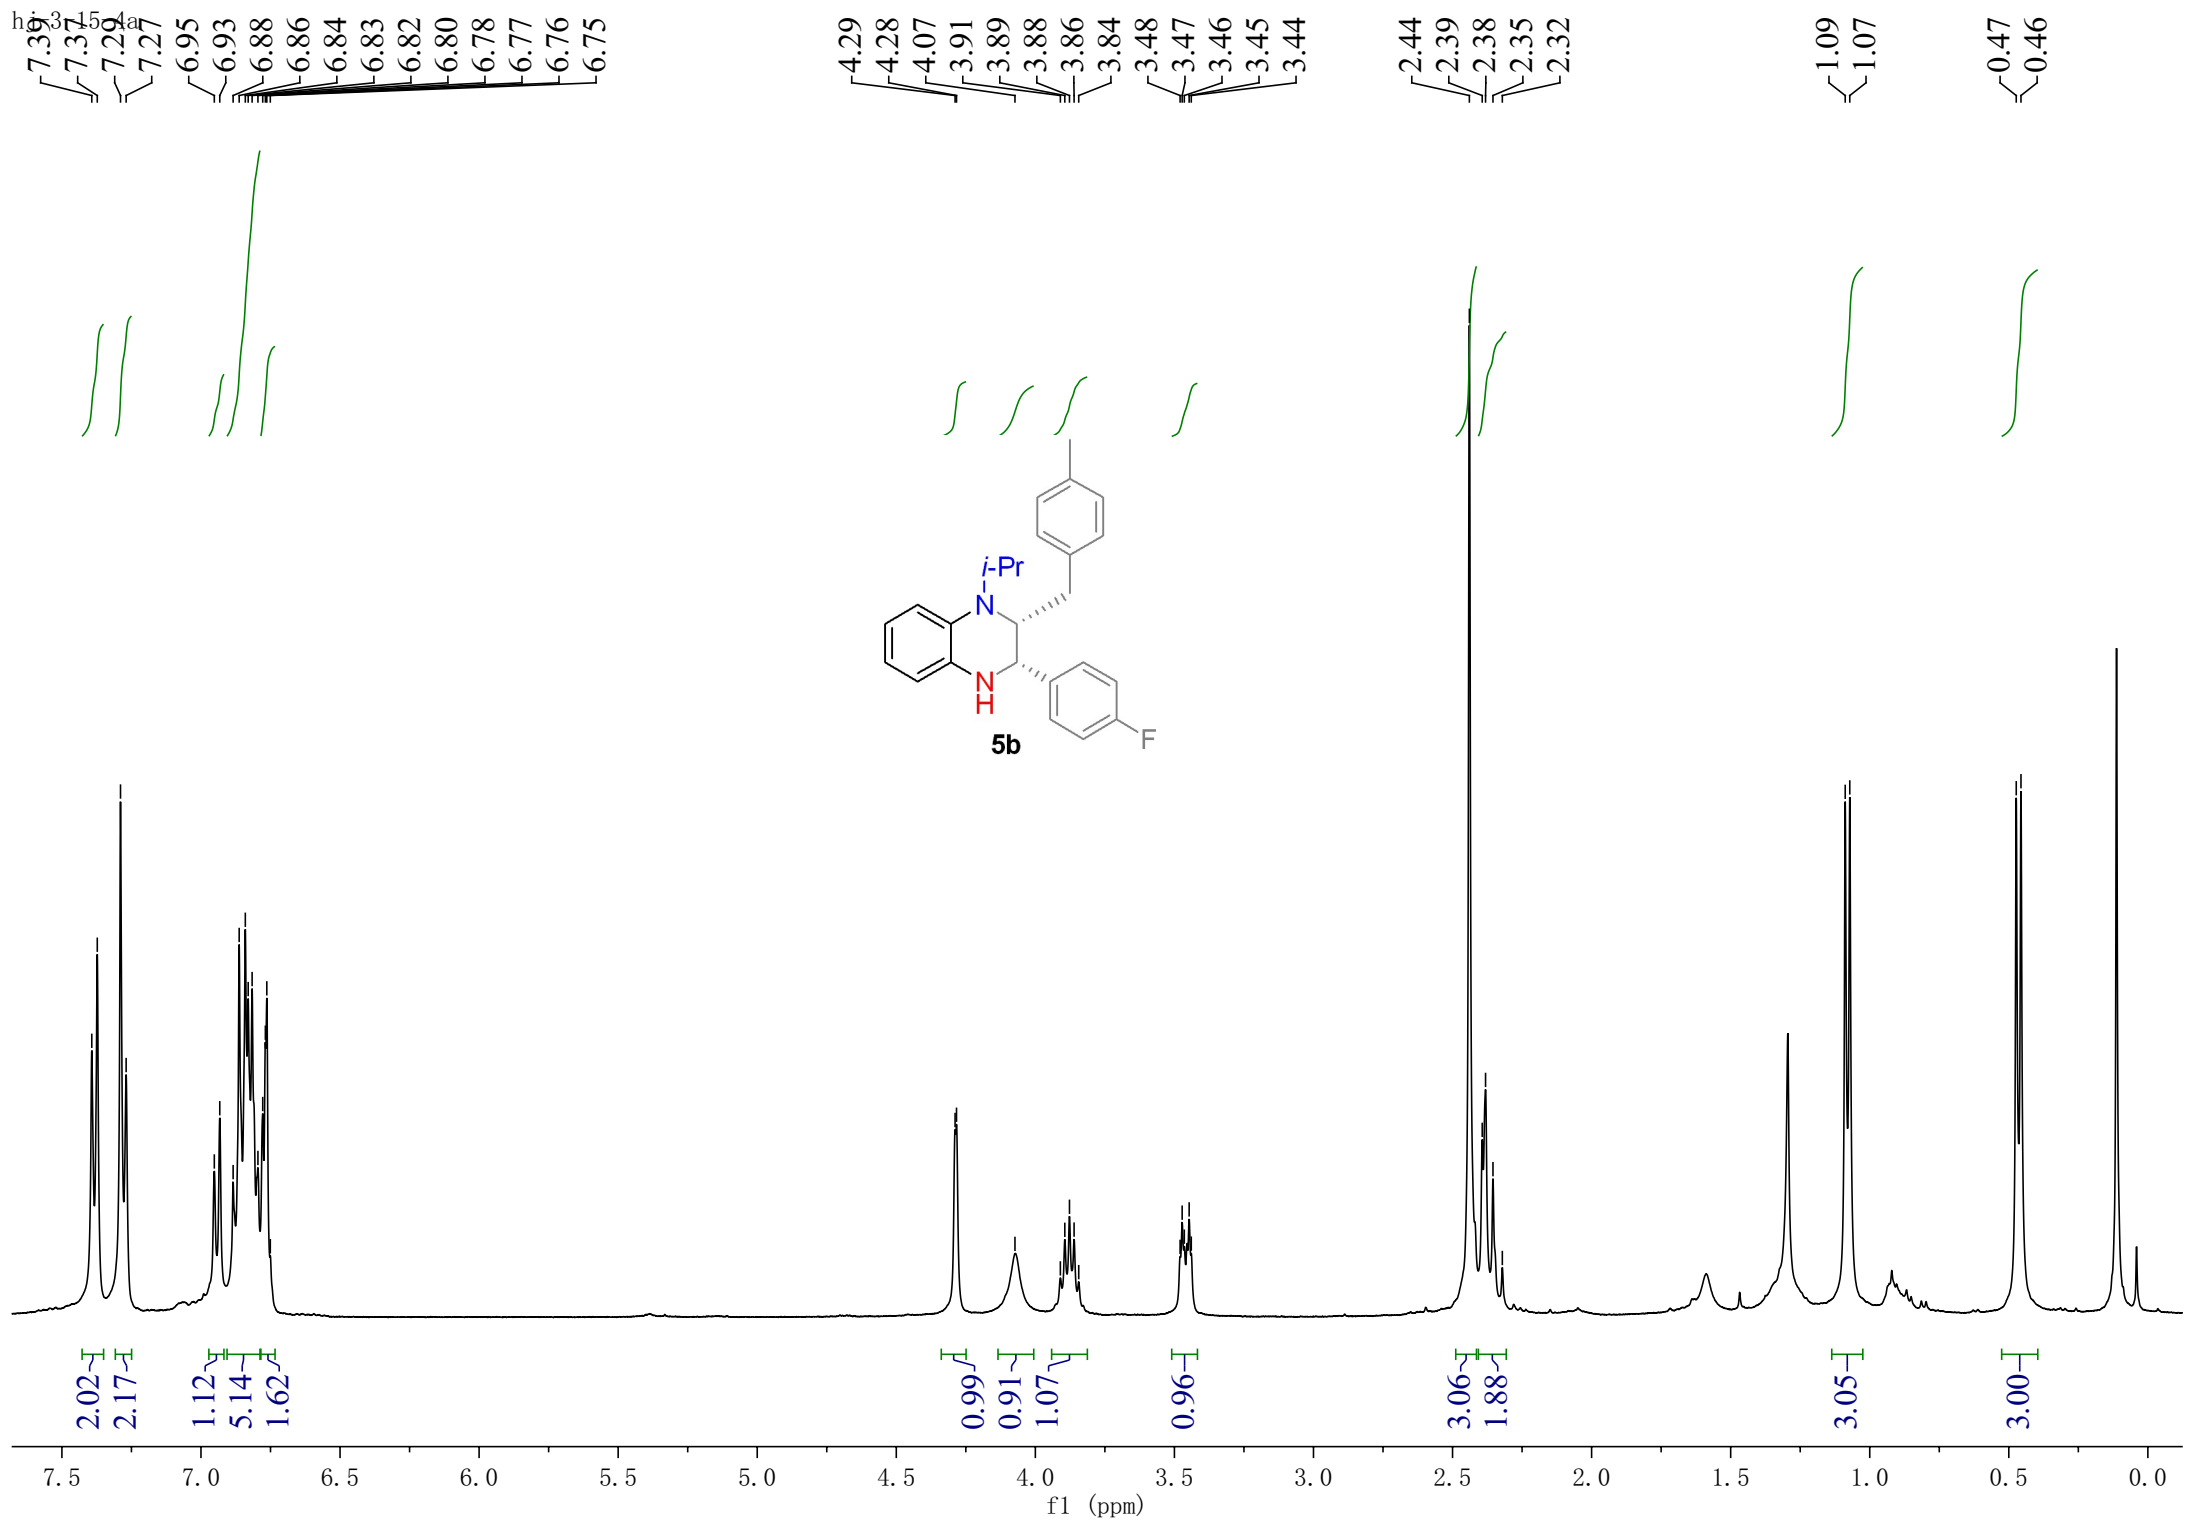



hj-3-15-4

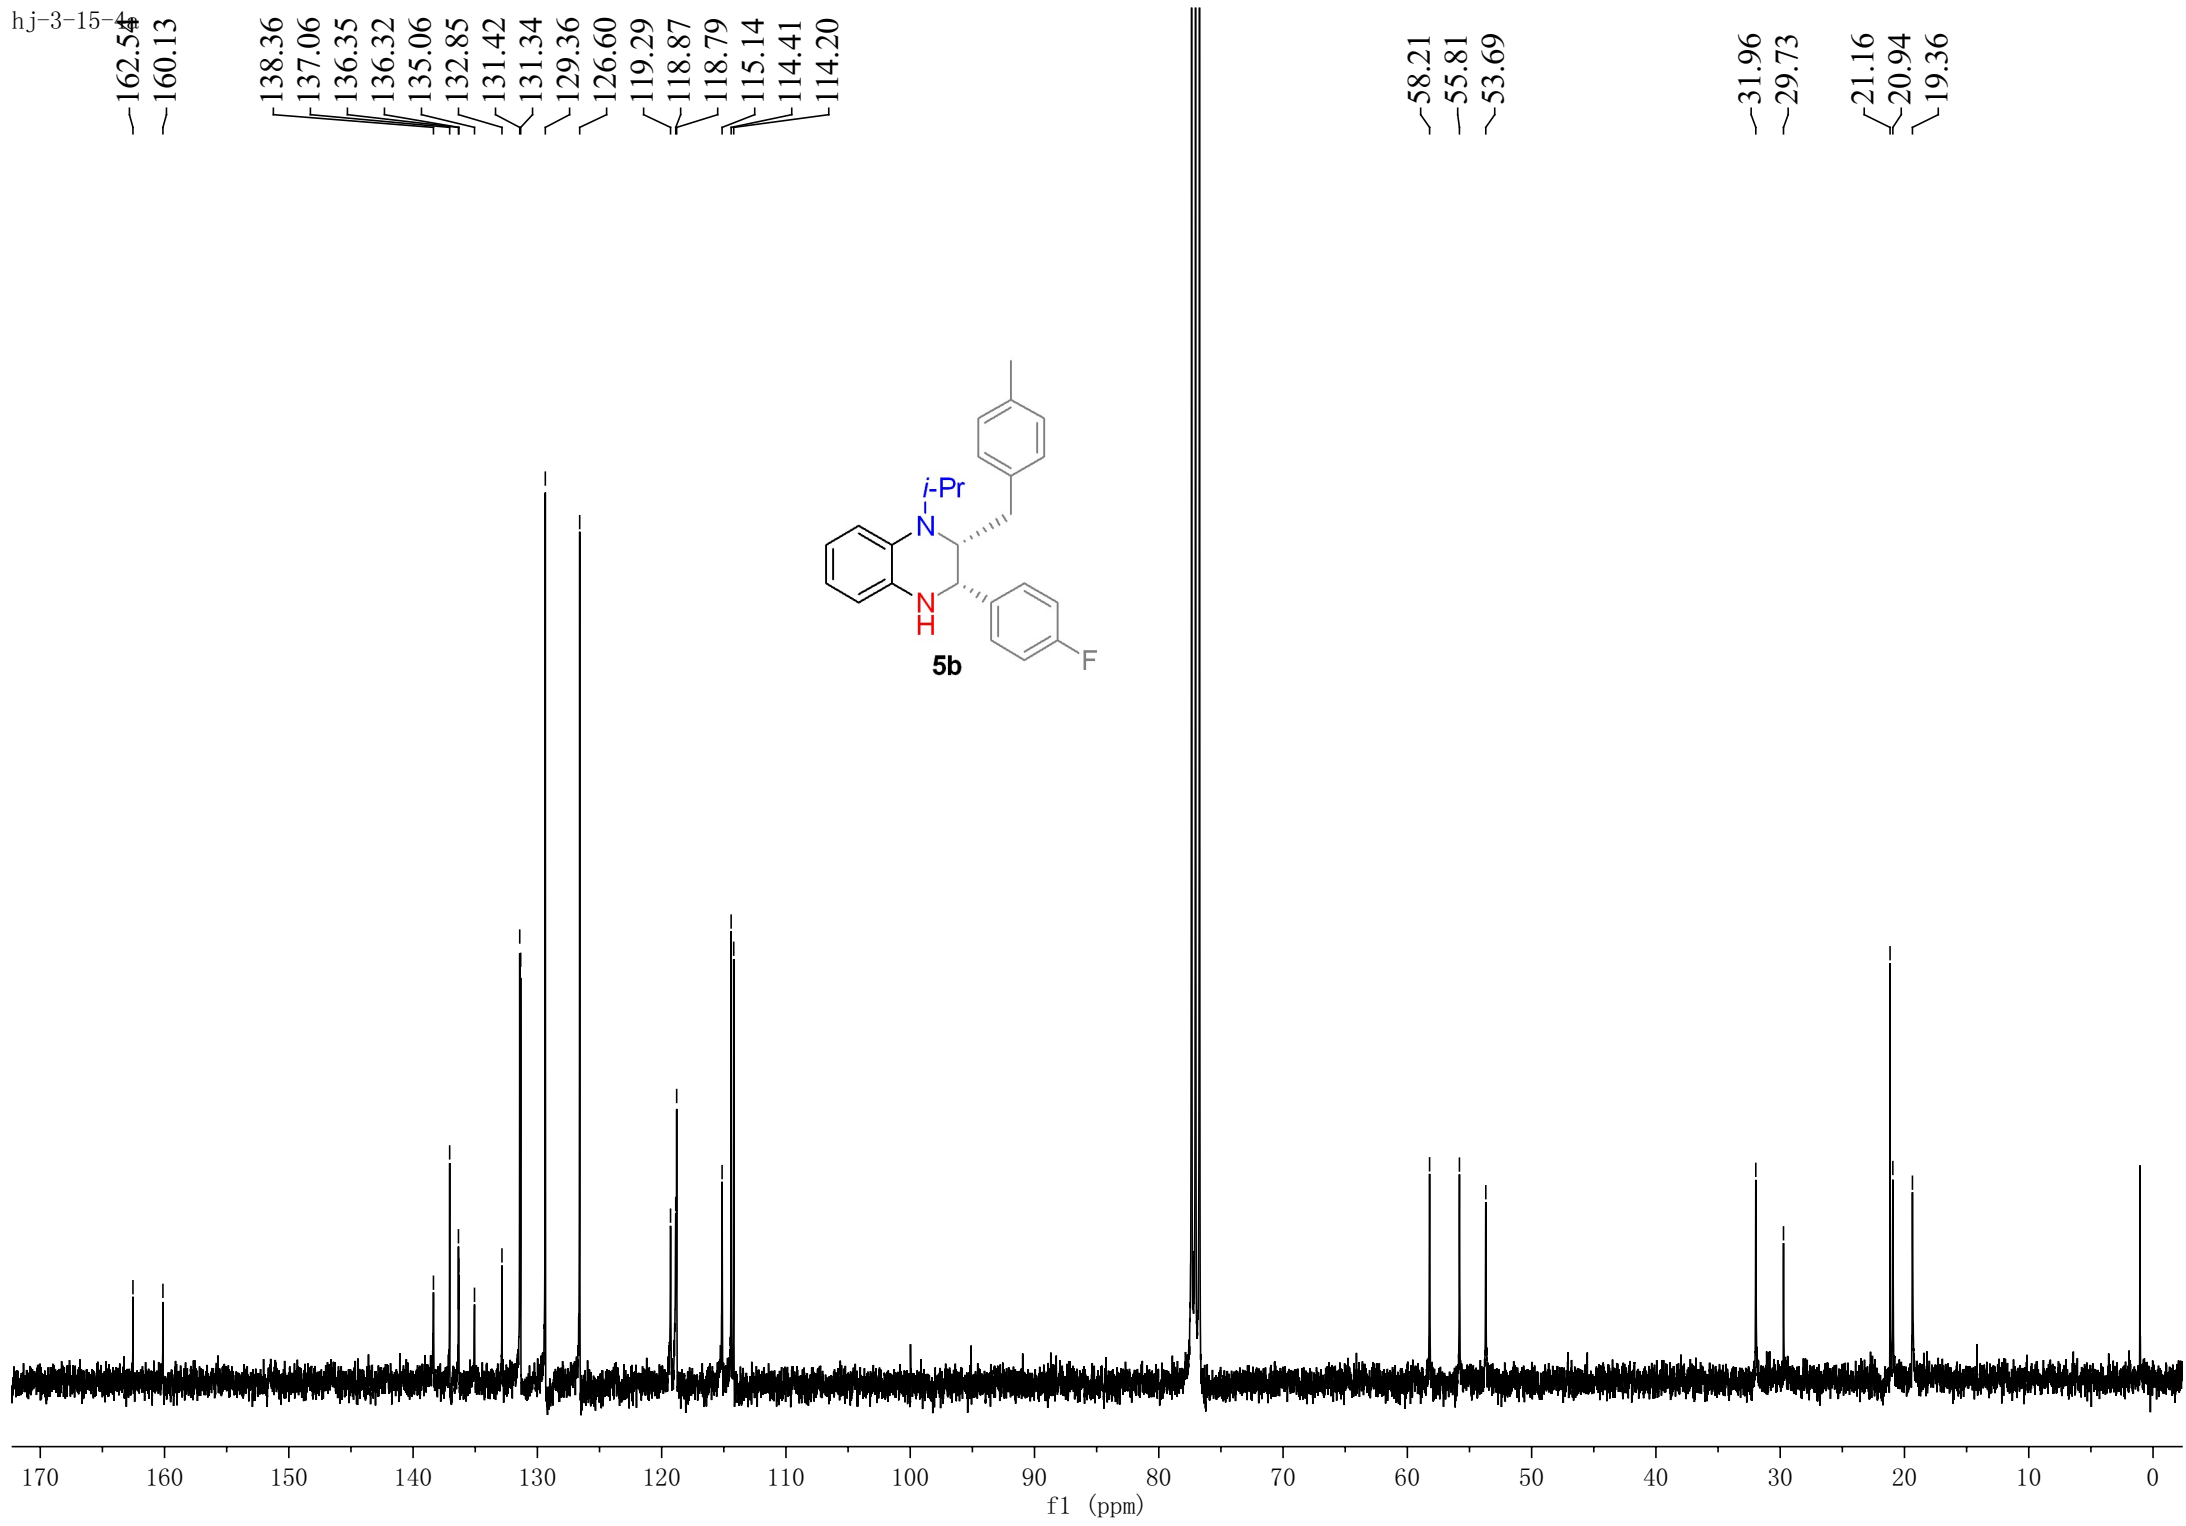

hj-20-12-7-1a

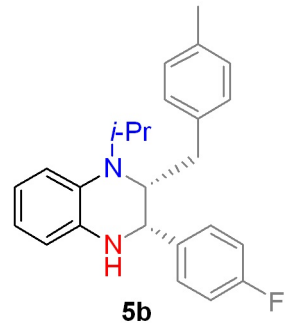

-118.32

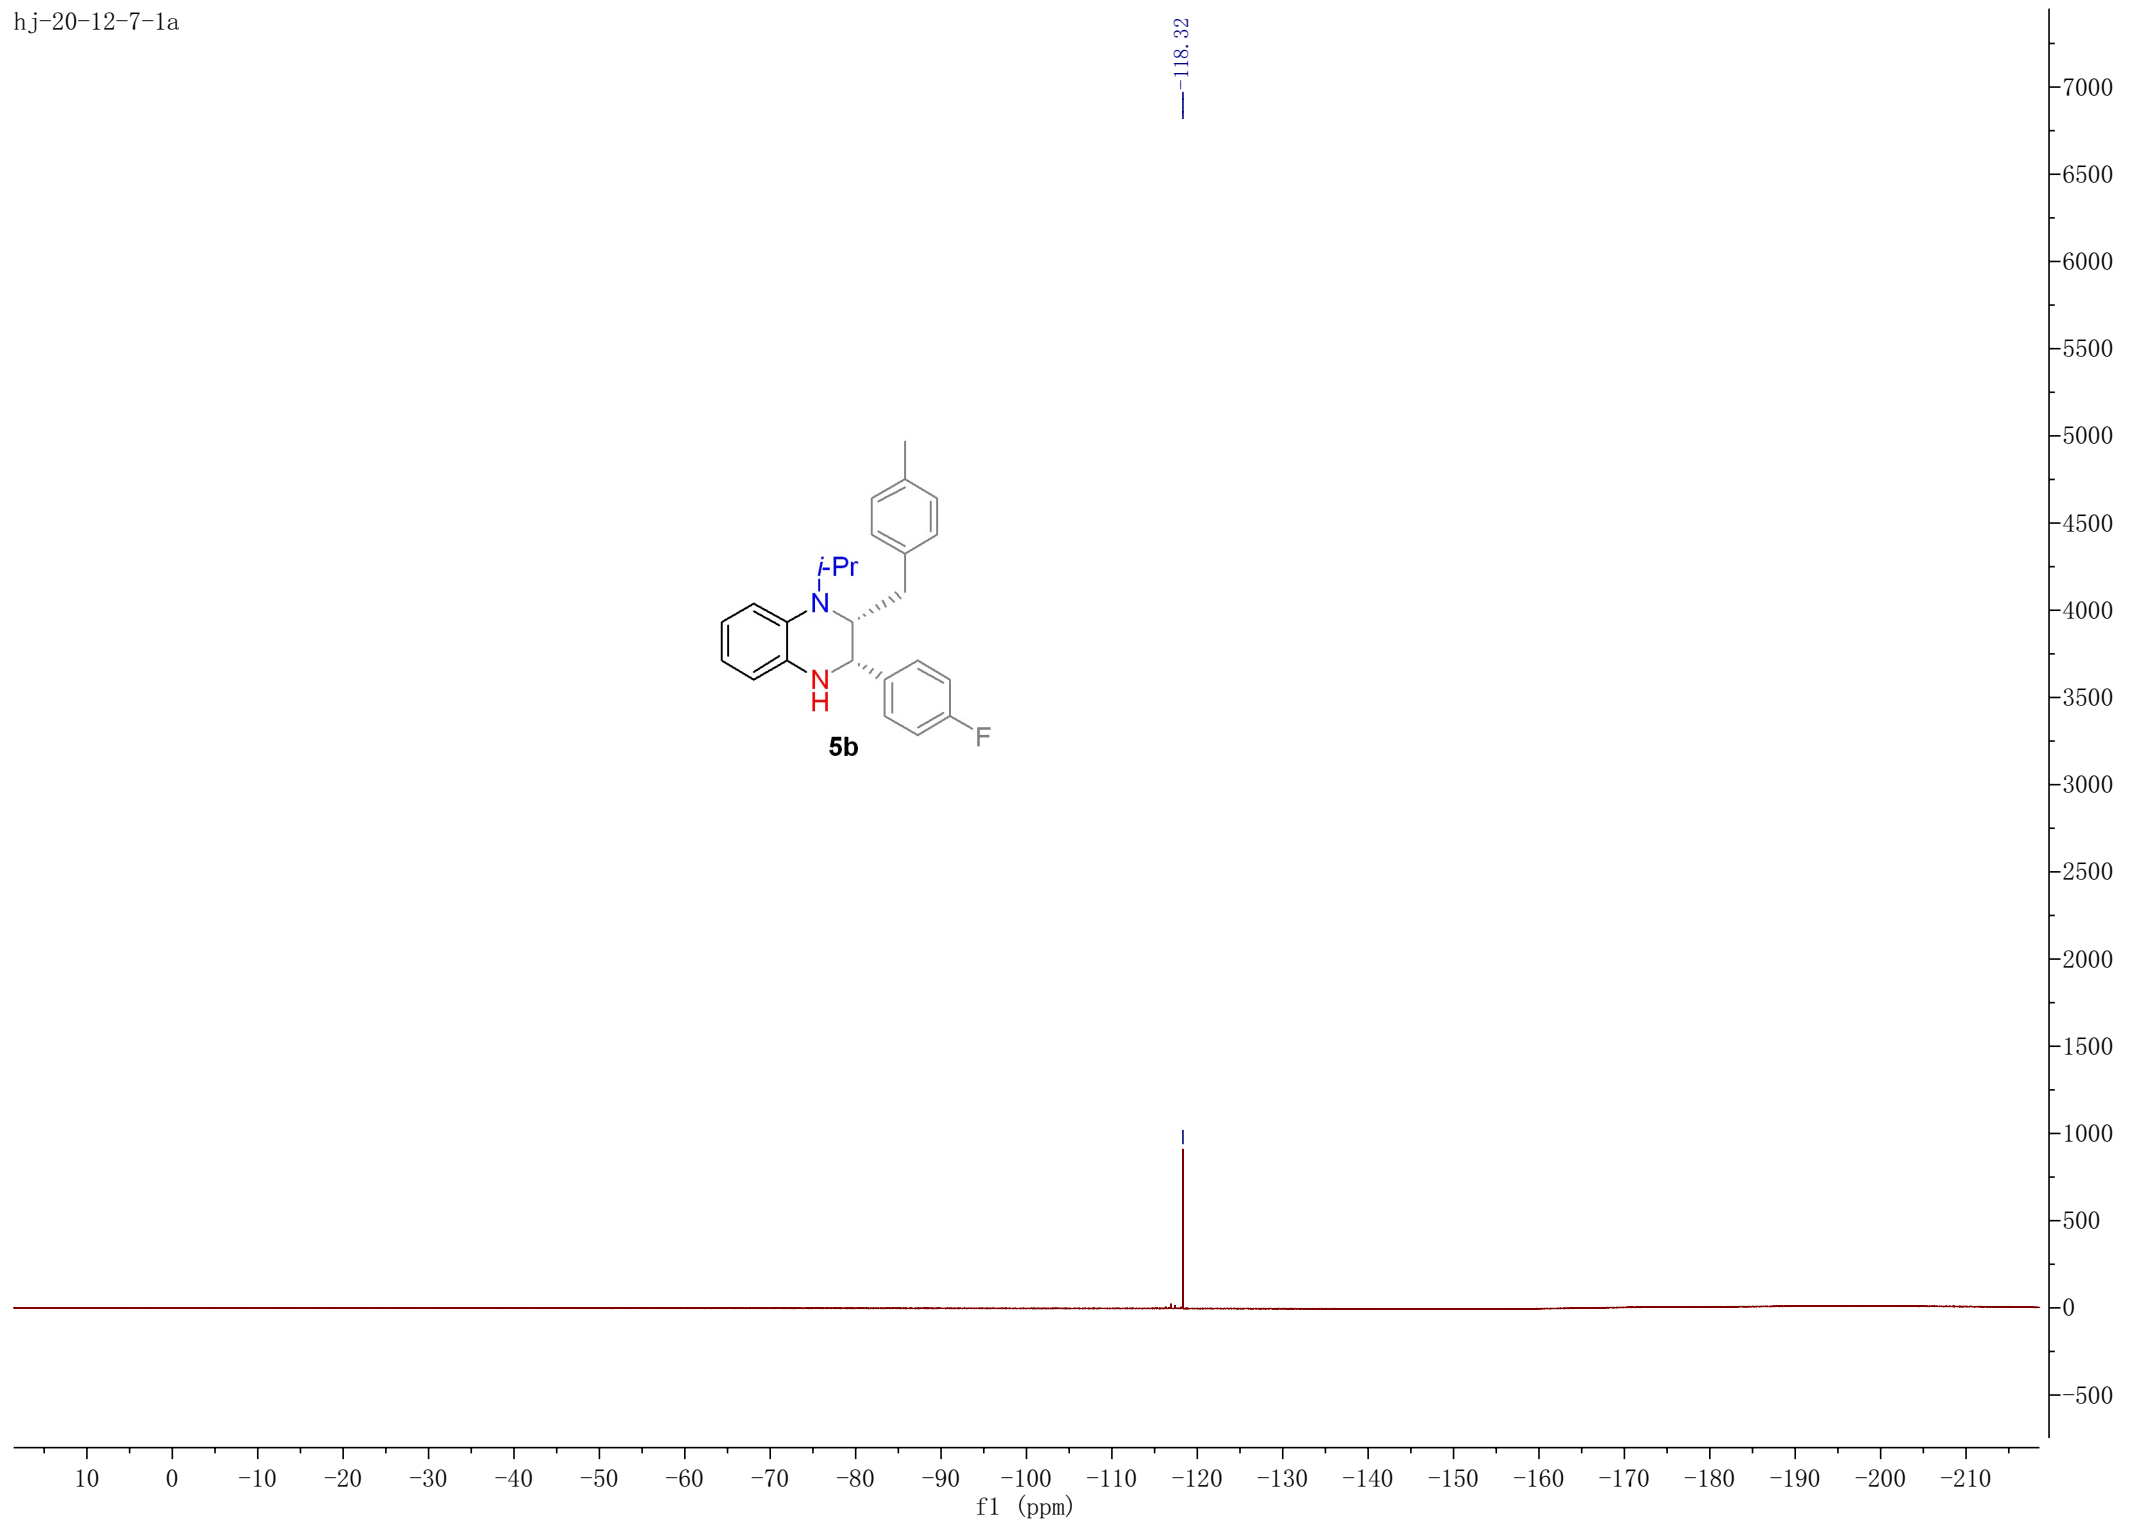

7.49  
7.47  
7.47  
7.45  
7.19  
7.17  
7.15  
6.95  
6.93  
6.89  
6.87  
6.85  
6.85  
6.82  
6.80  
6.78  
6.77  
6.77  
6.75

4.30  
4.04  
3.91  
3.89  
3.87  
3.86  
3.84  
3.45  
3.43  
3.42  
3.41

2.36  
2.35

1.08  
1.06

0.47  
0.46

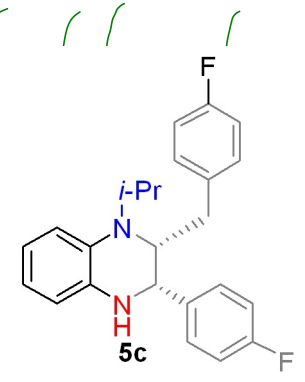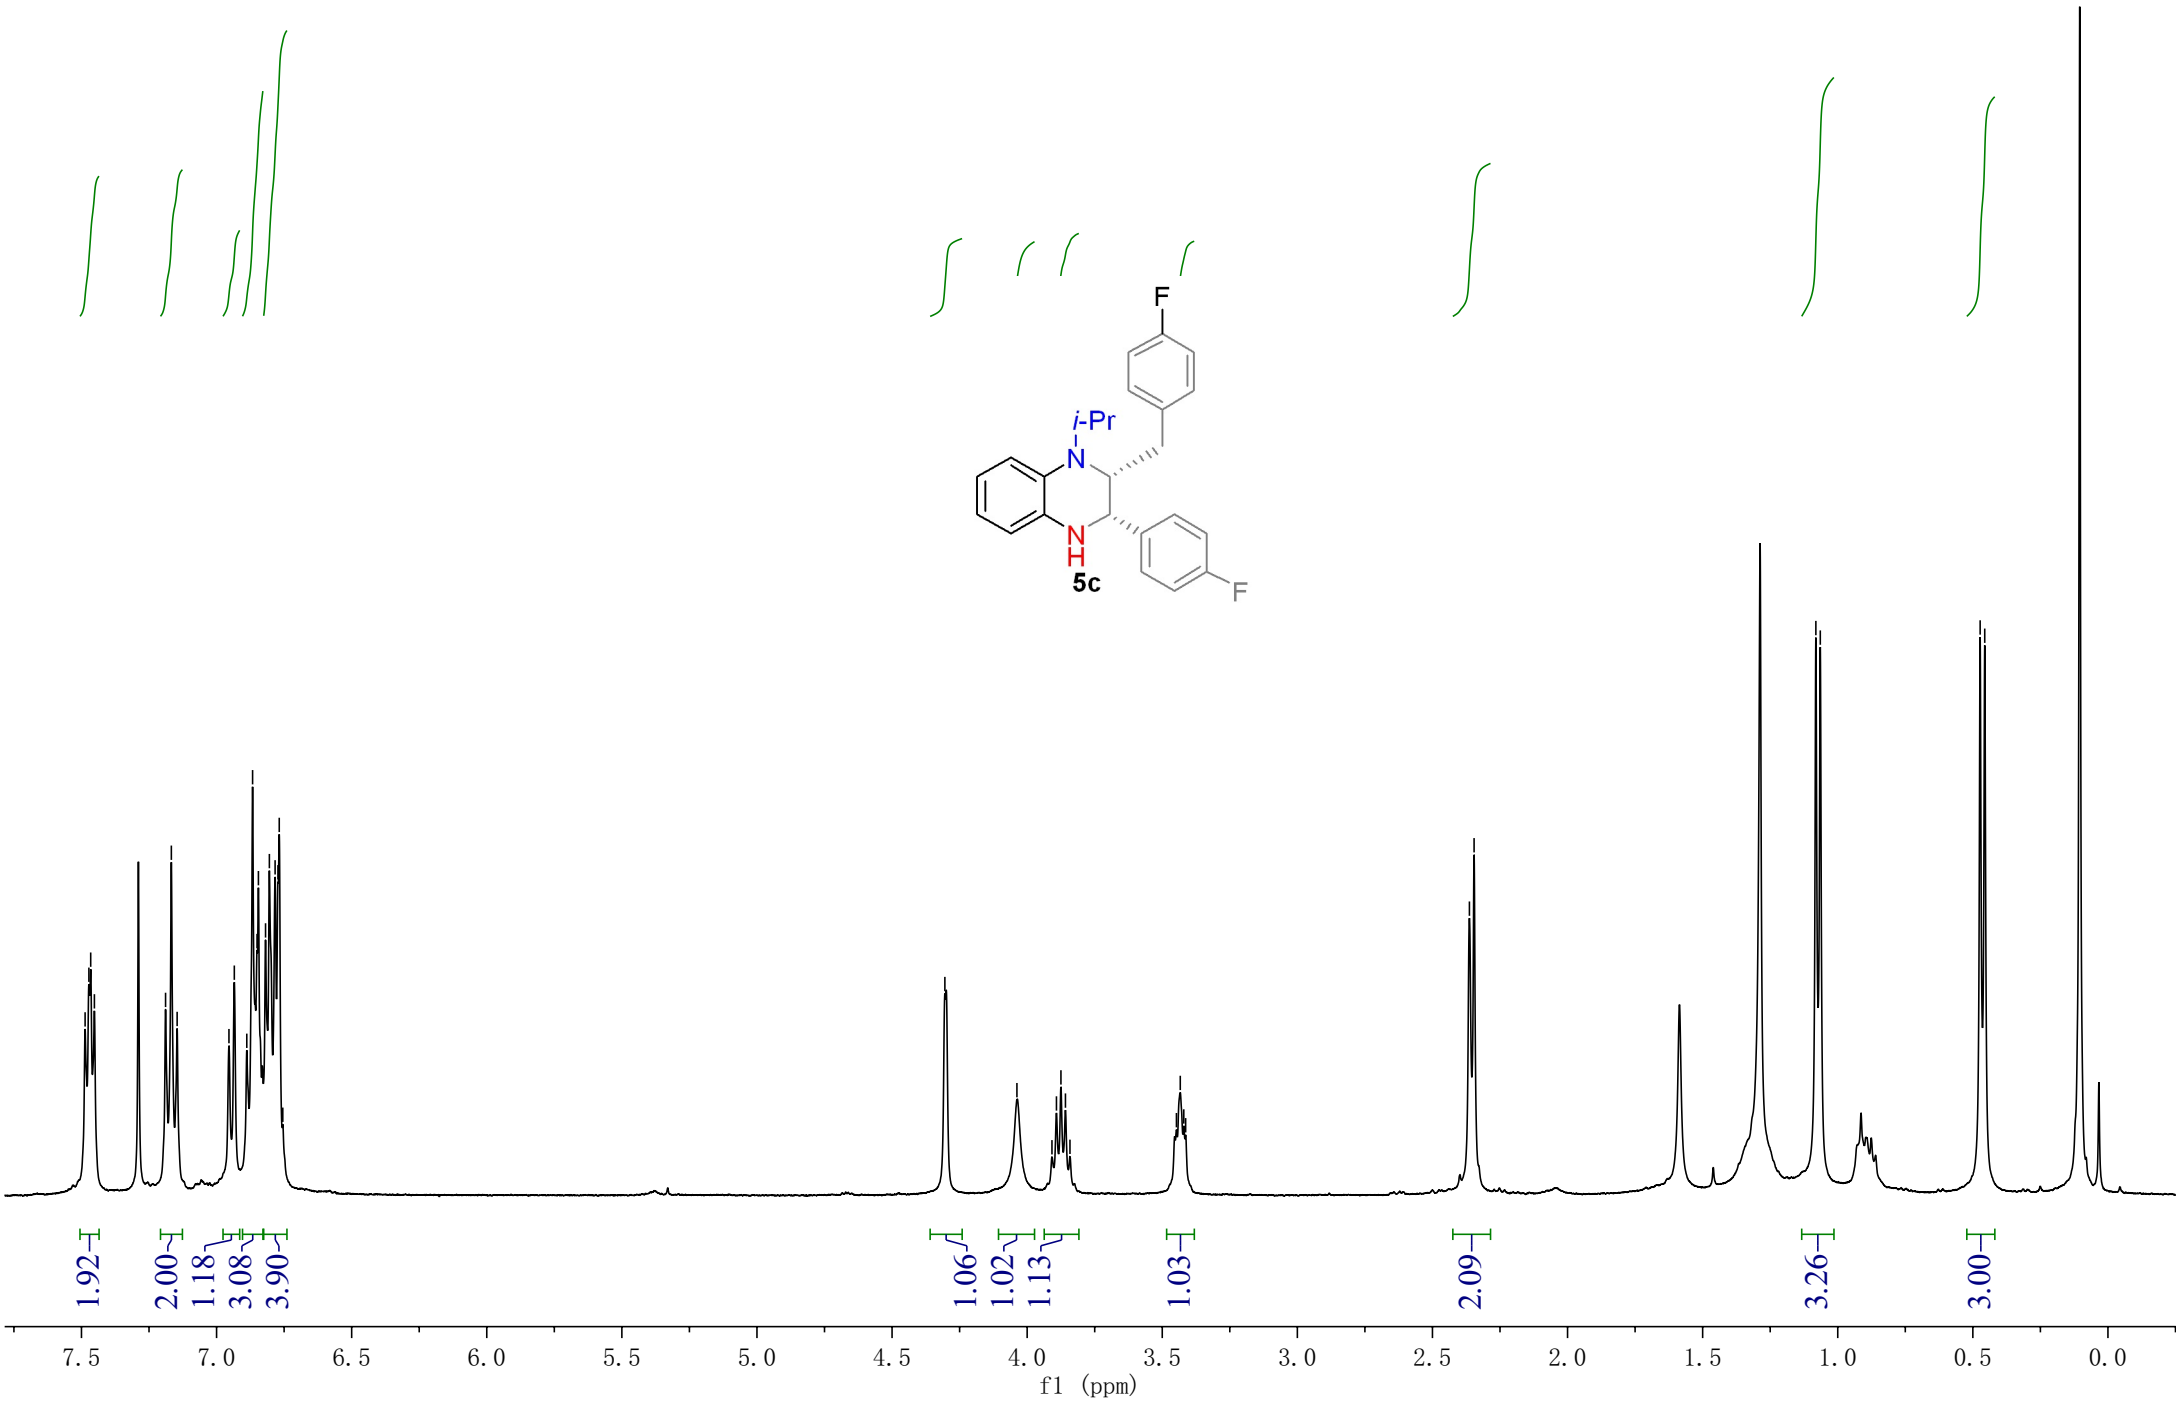

hj-3-10-5

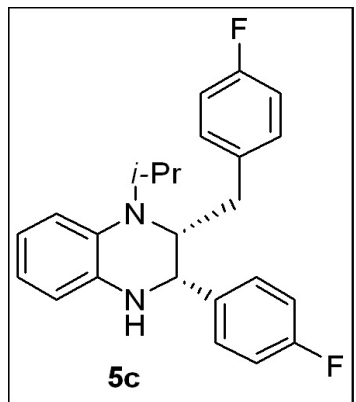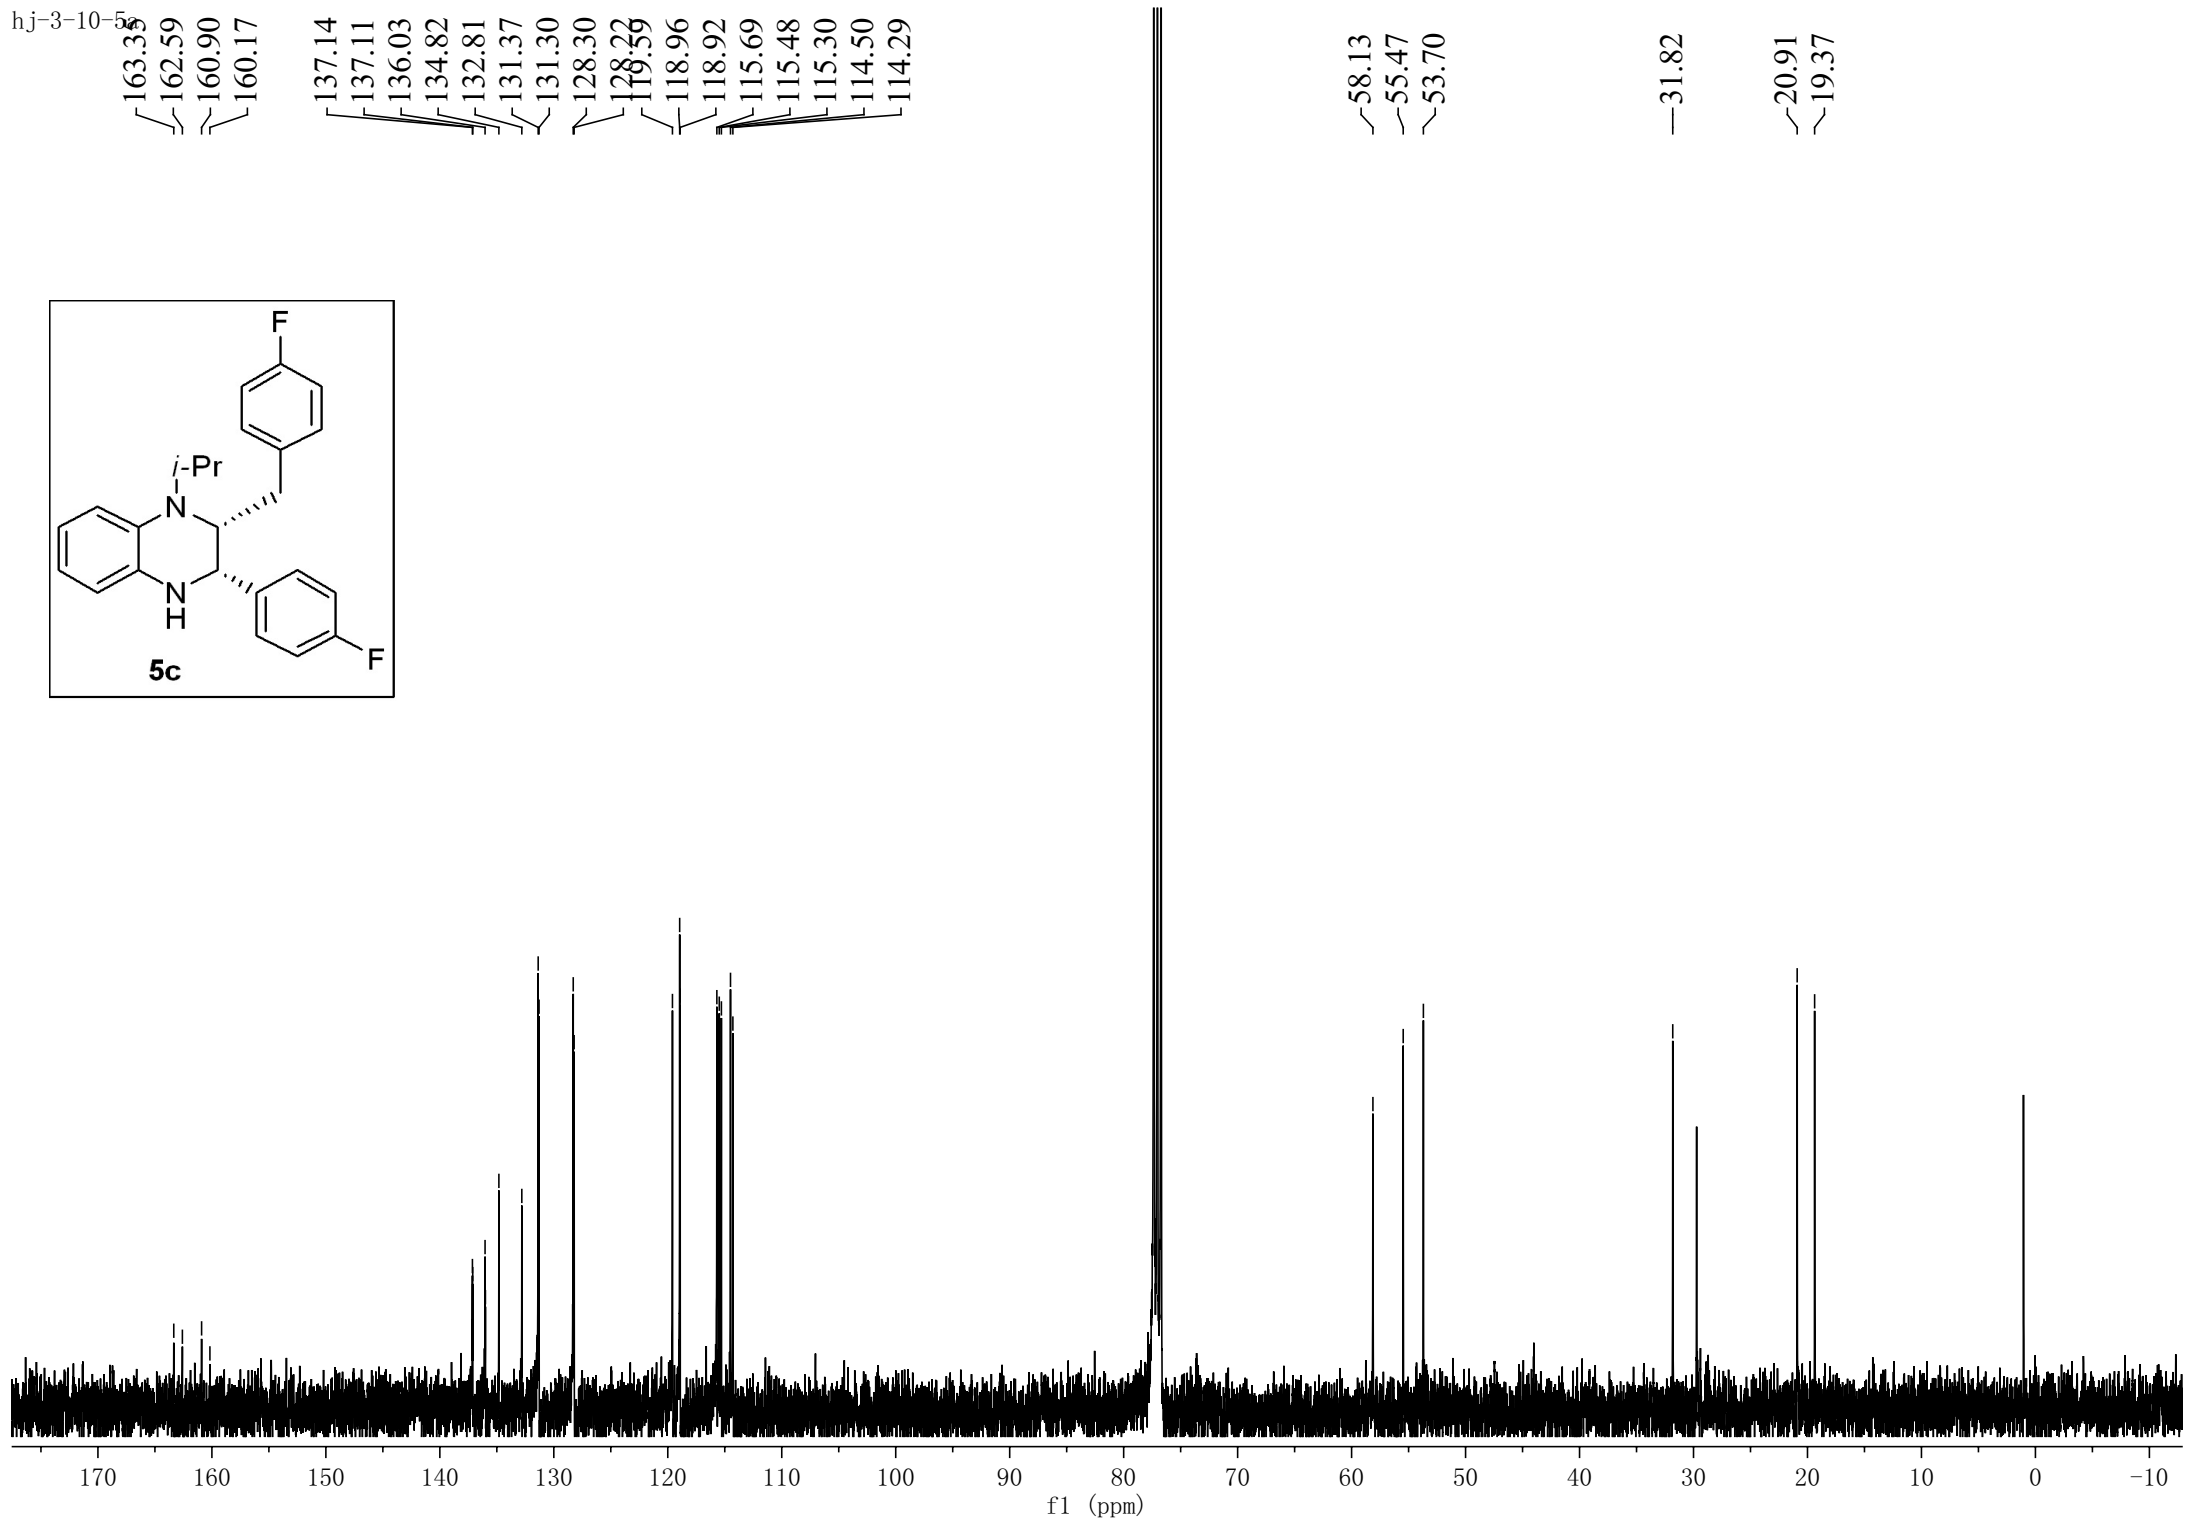

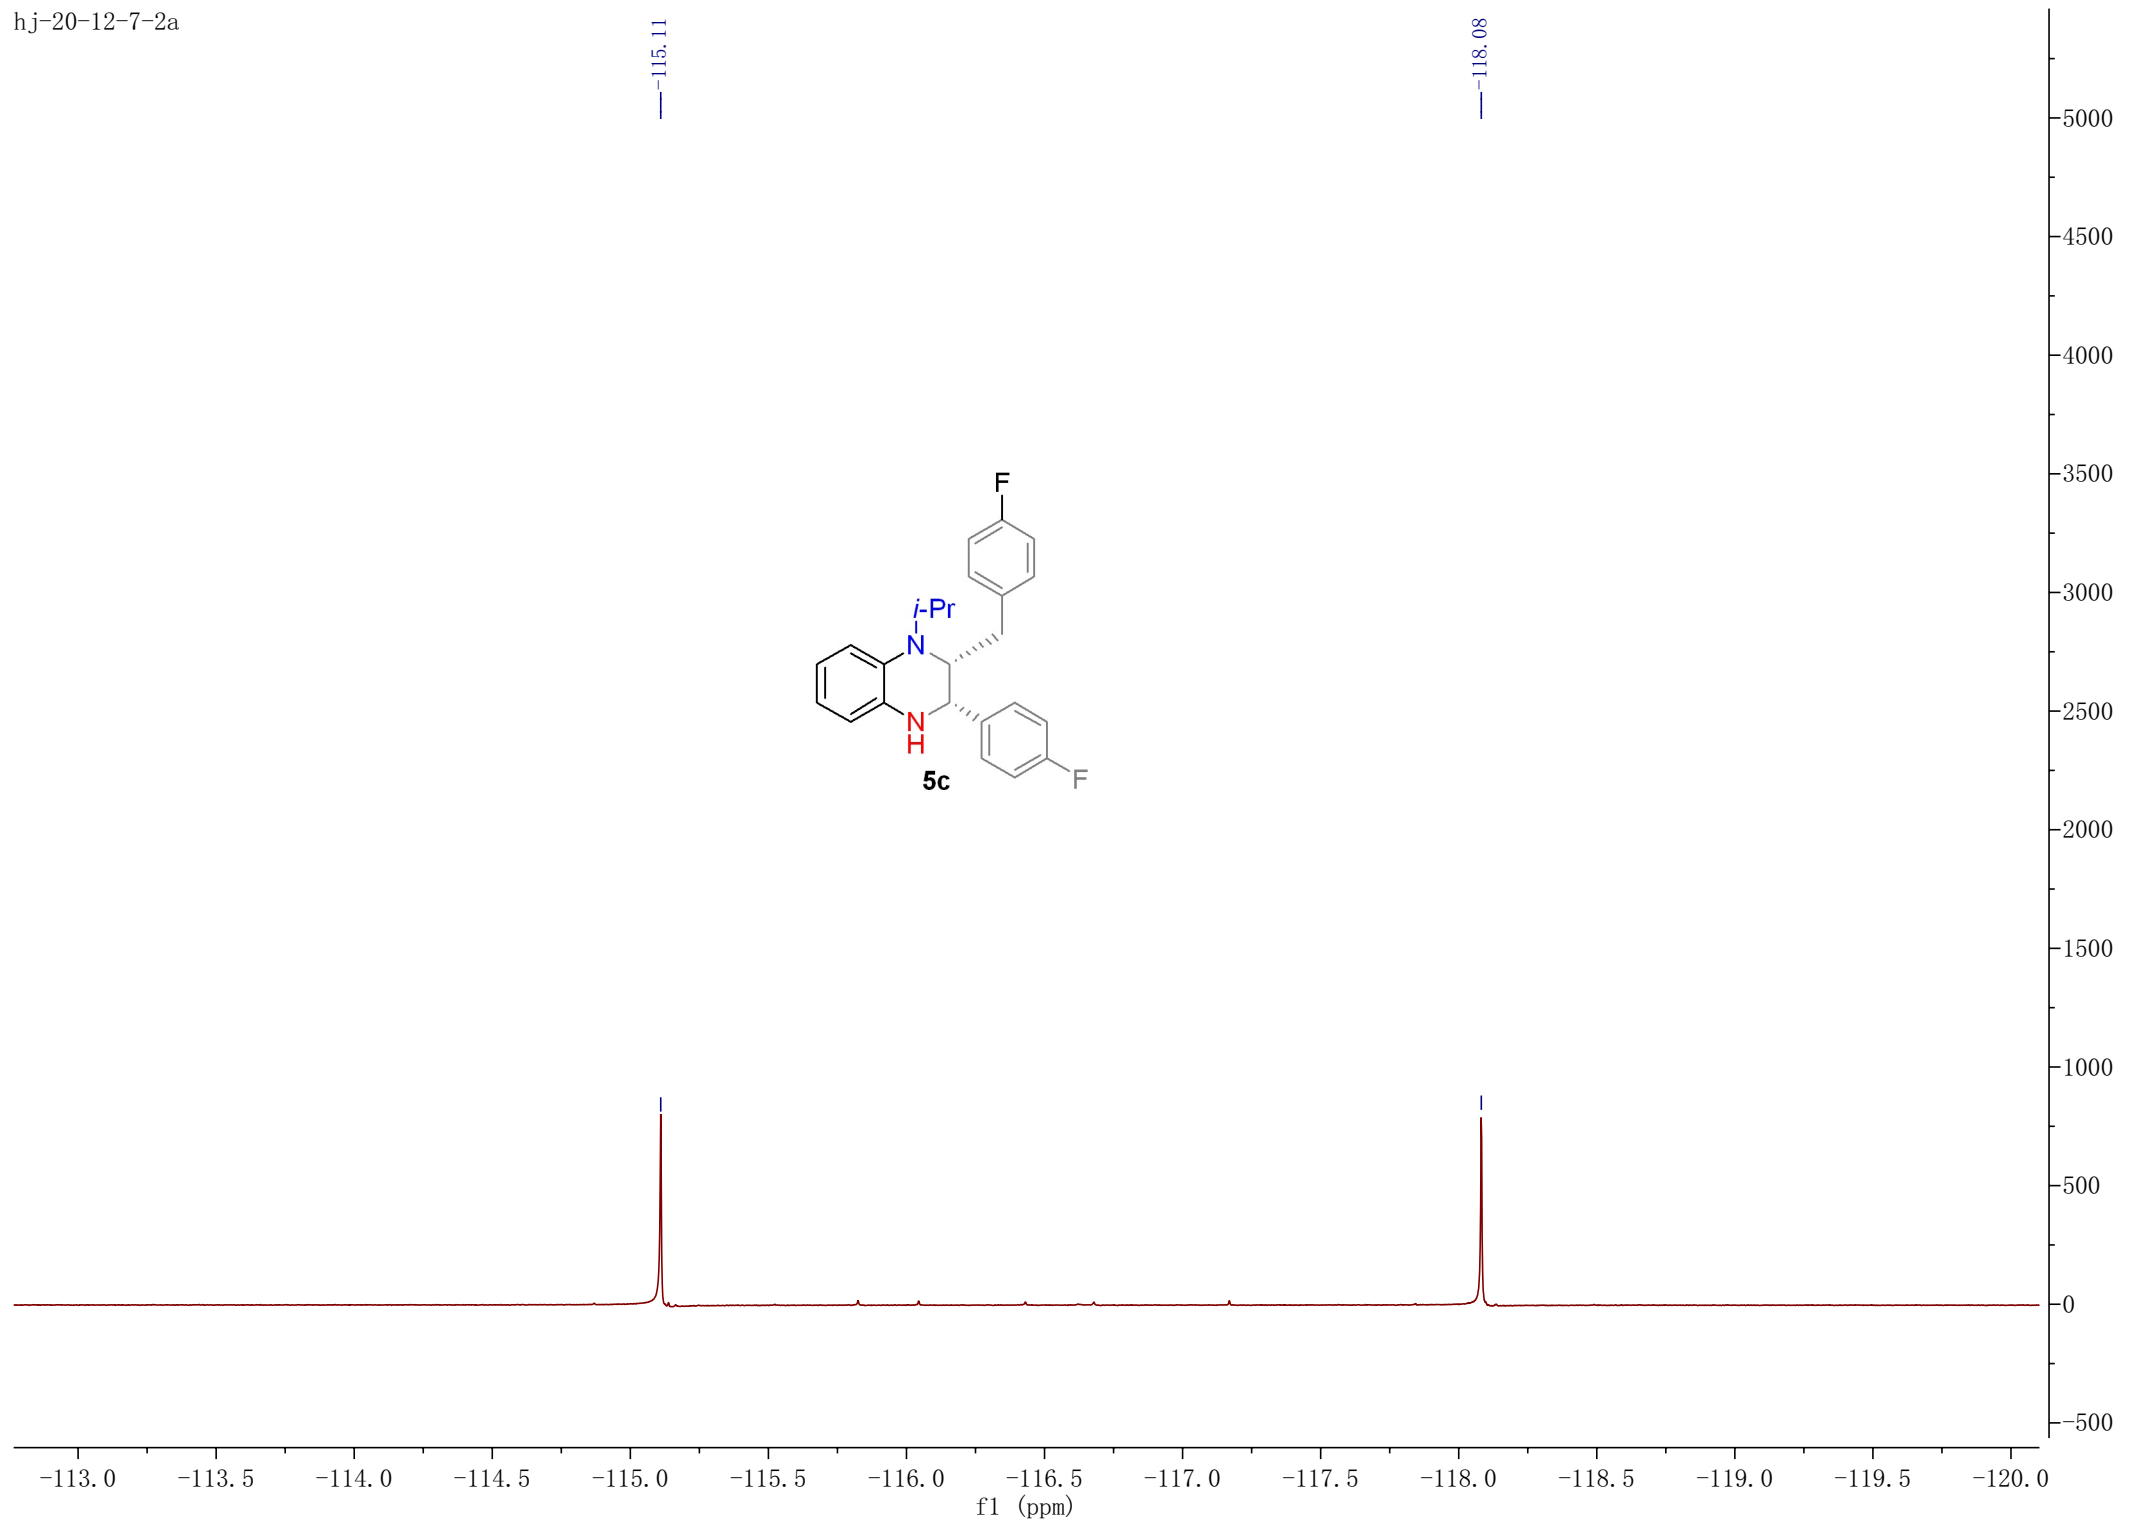

7.37  
7.28  
7.28  
6.89  
6.86  
6.84  
6.83  
6.82  
6.81  
6.75  
6.58

4.25  
3.88  
3.86  
3.85  
3.41  
3.39

2.44  
2.38  
2.37  
2.34  
2.32  
2.31  
2.25  
2.24

1.08  
1.07

0.47  
0.46

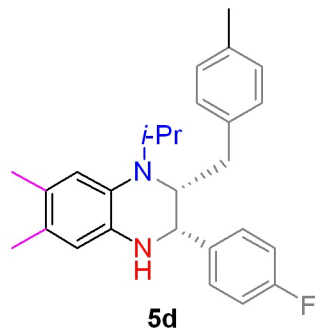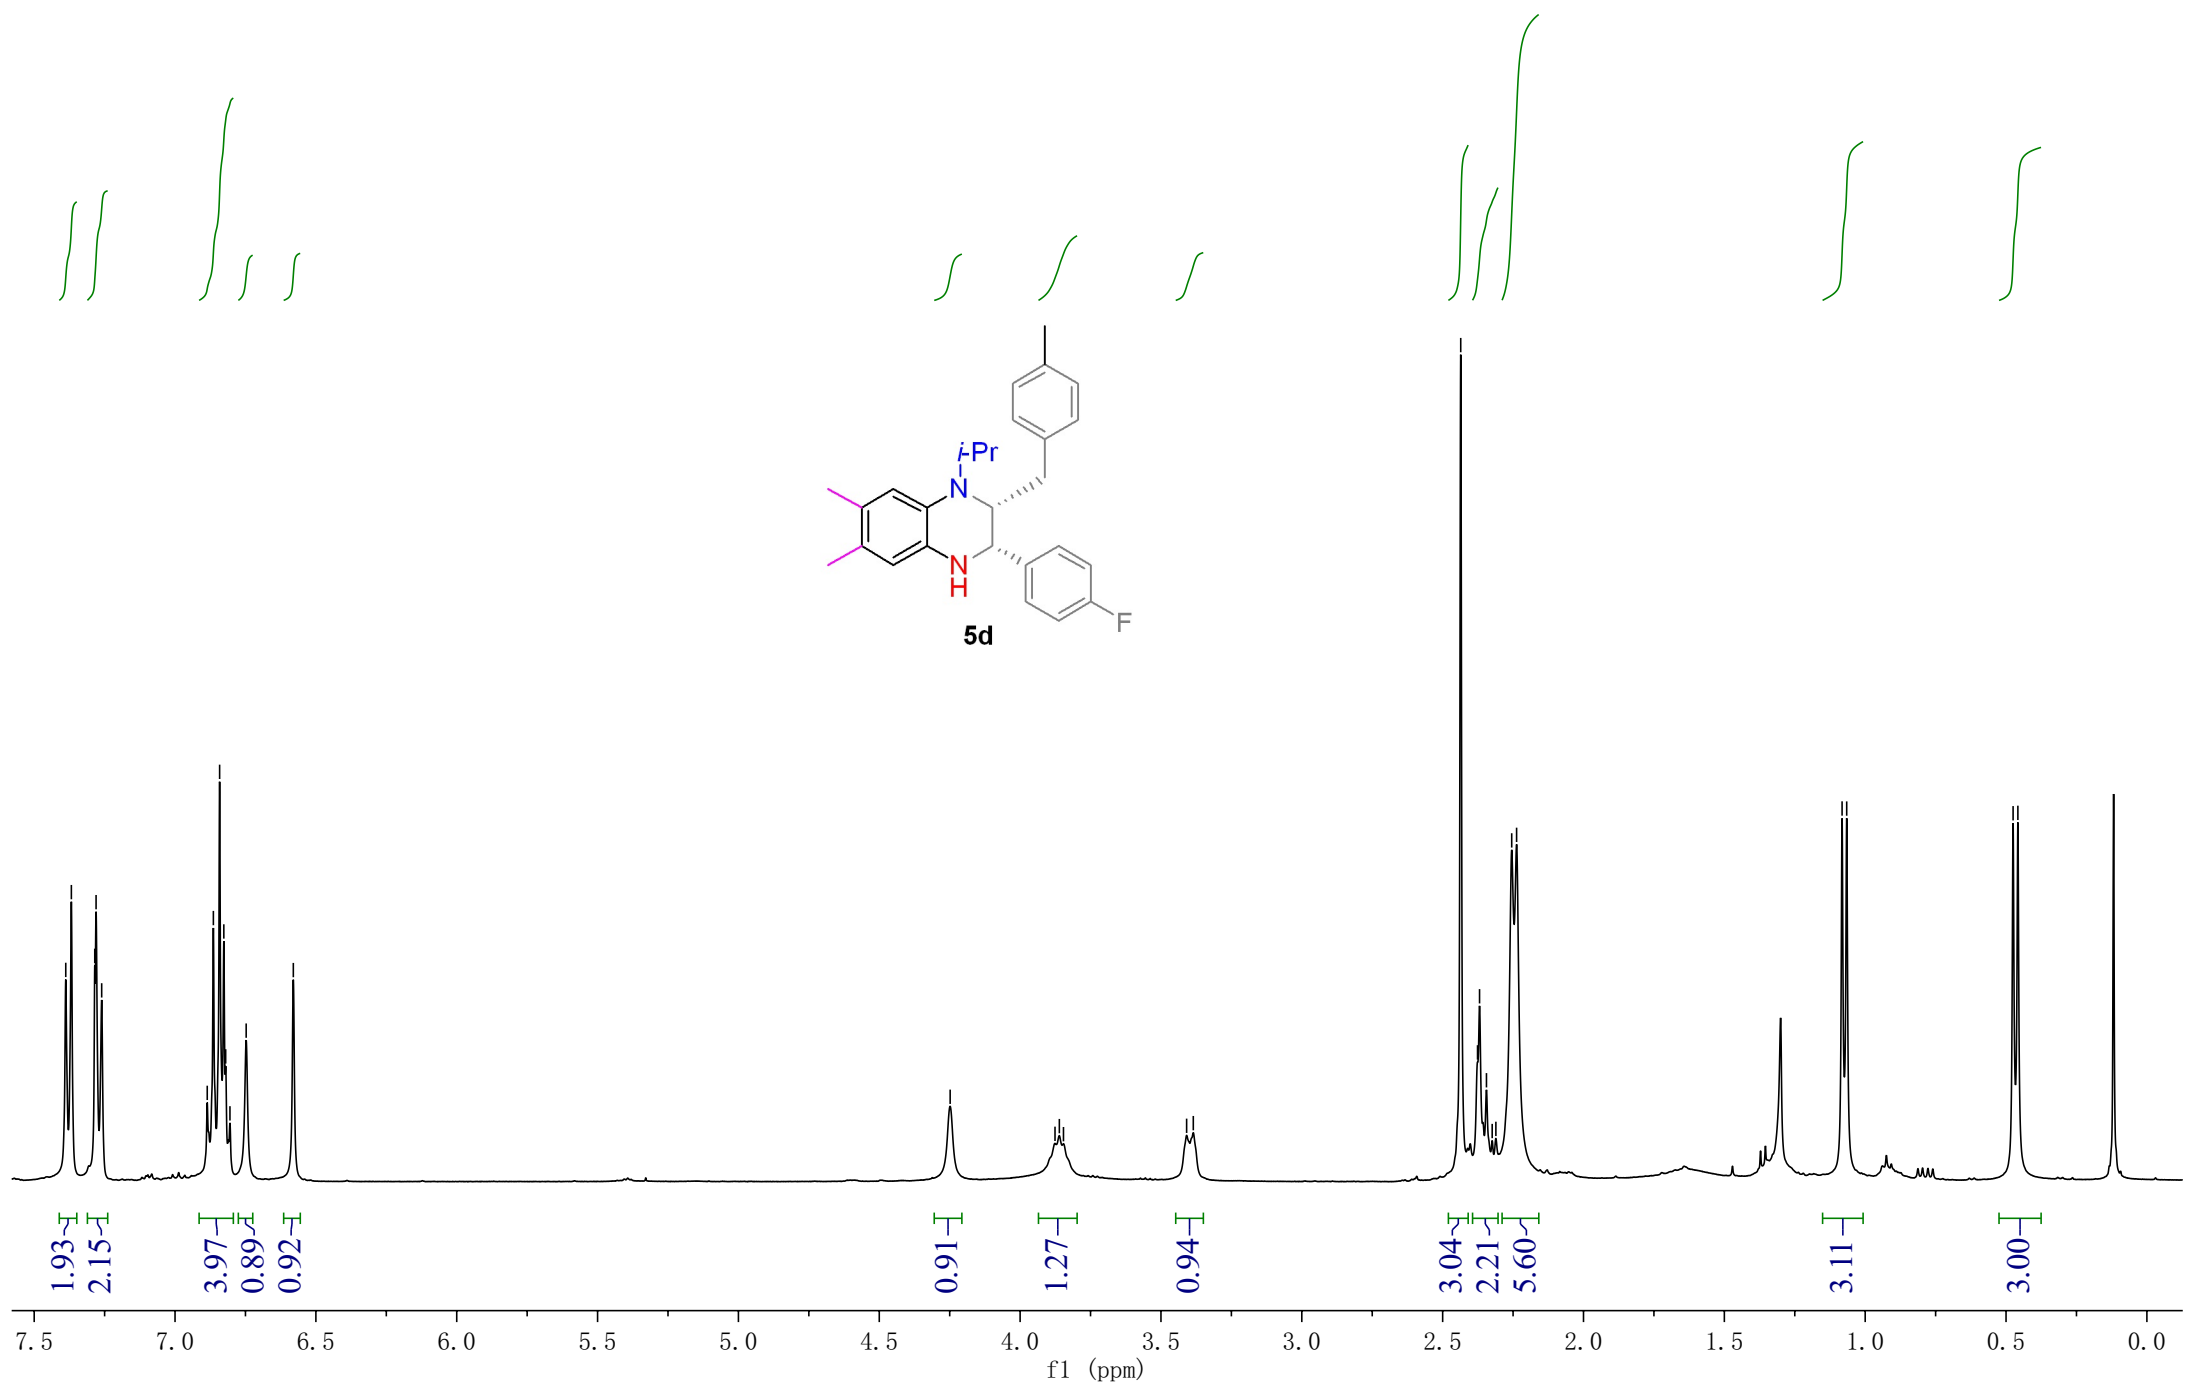

hj-7-13-3

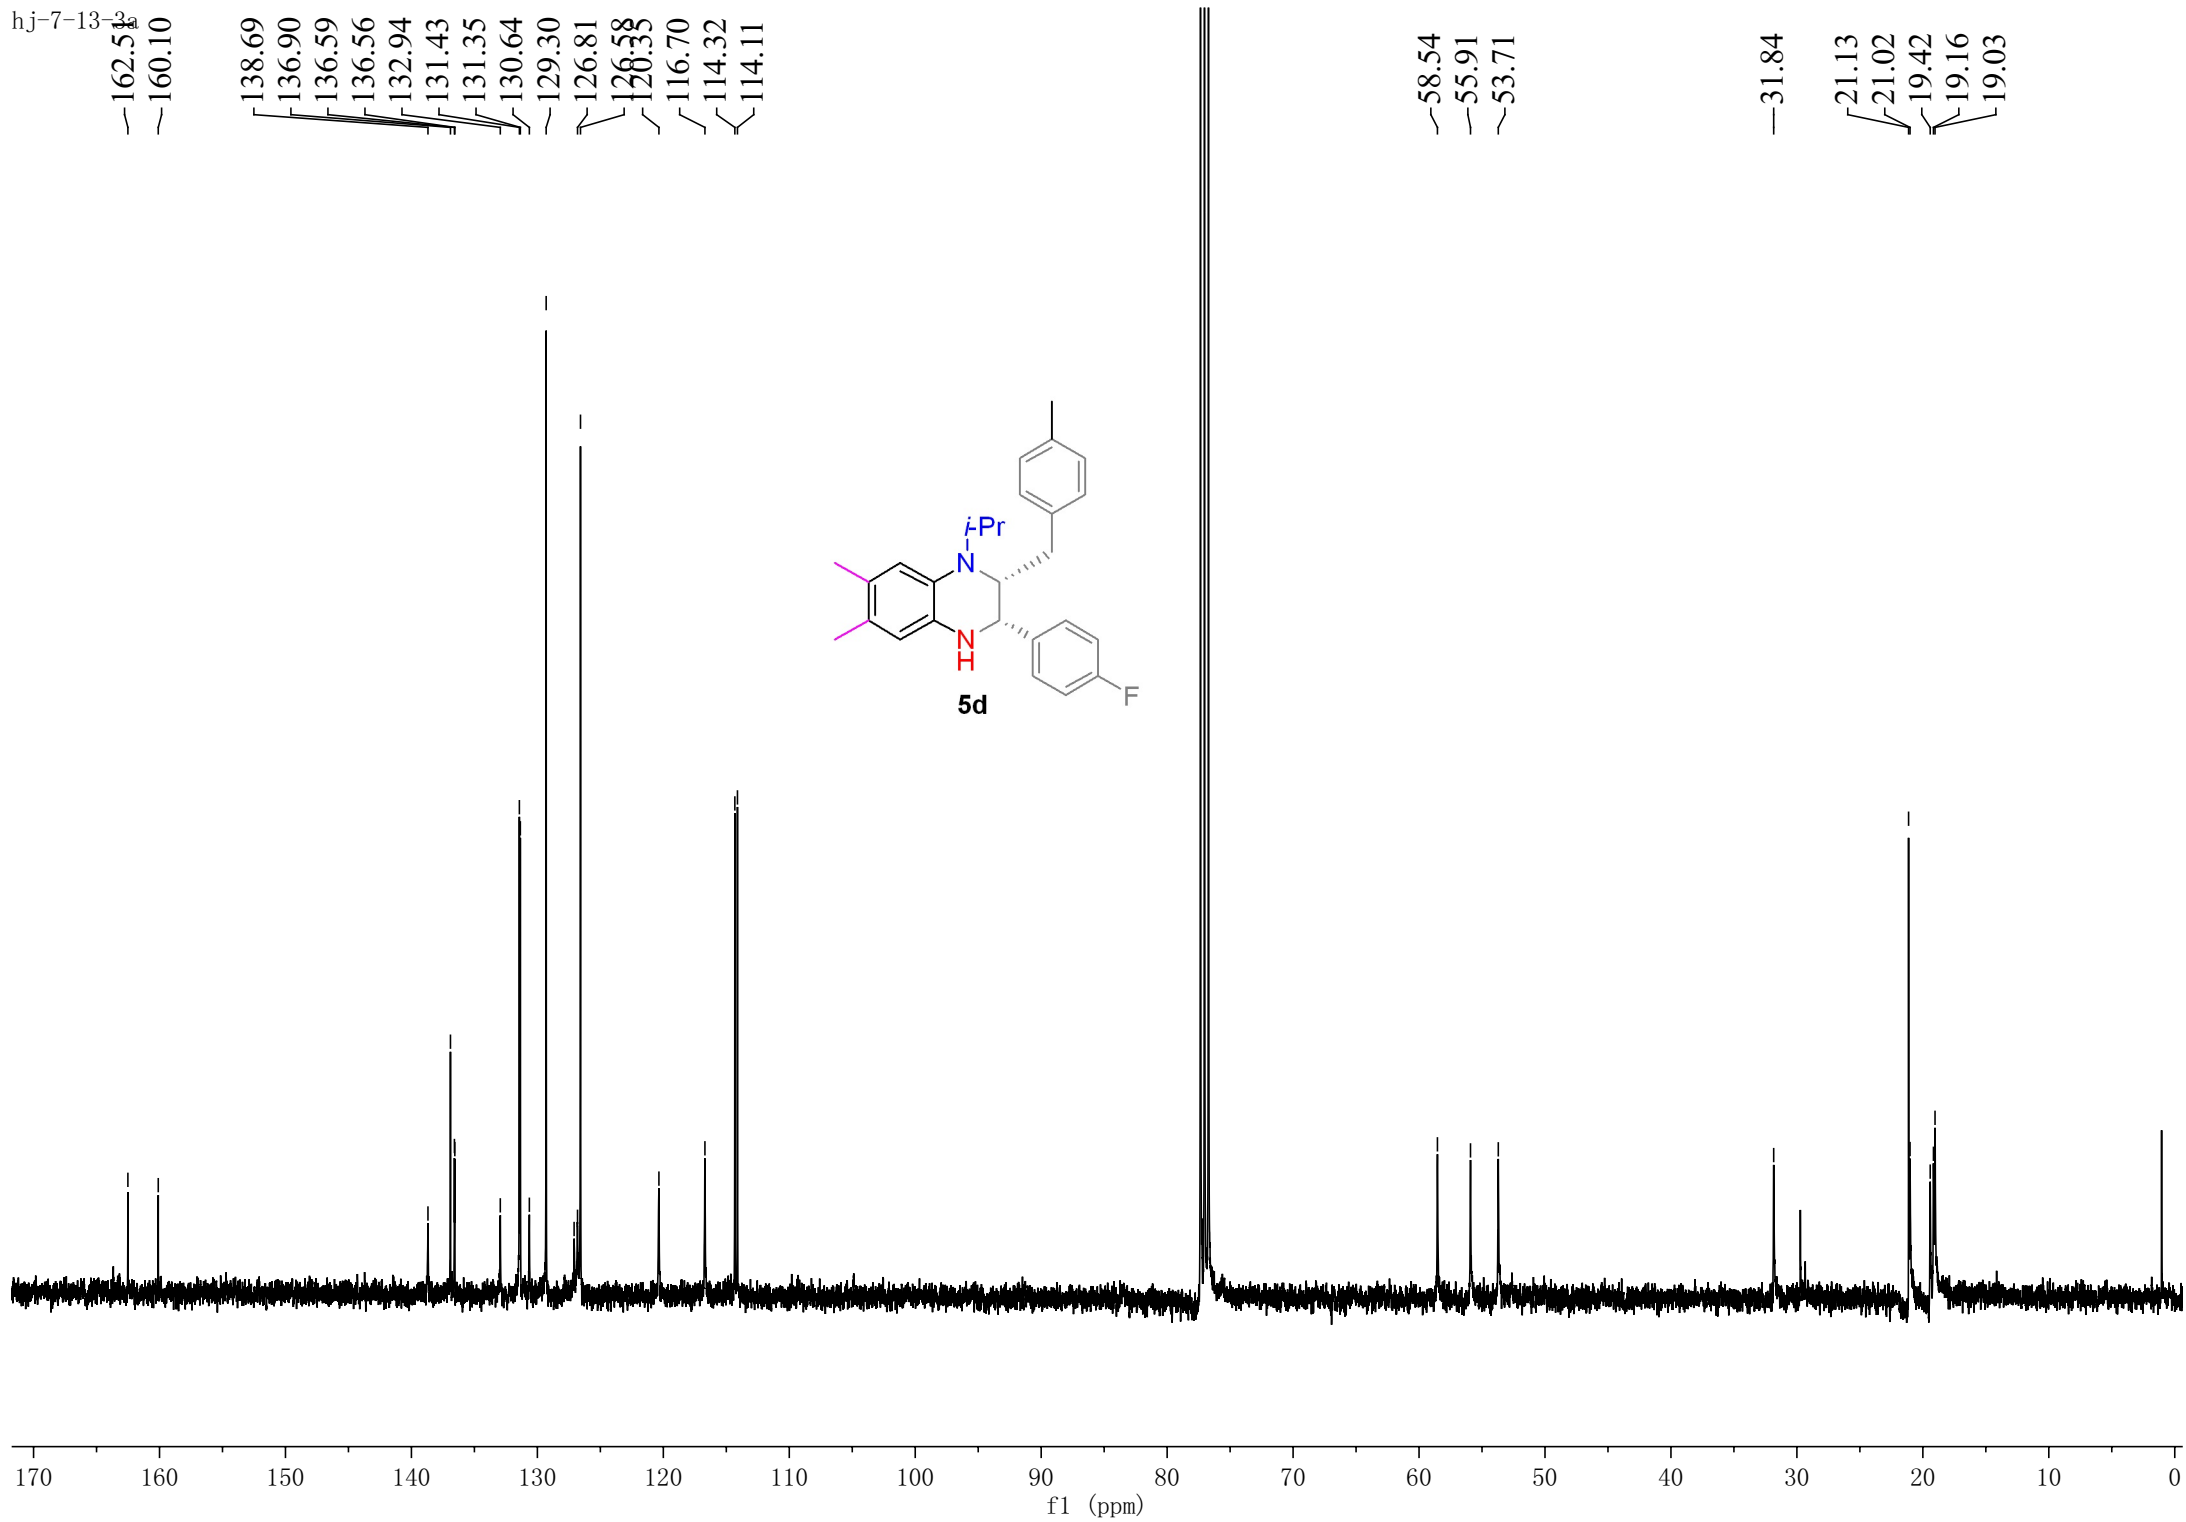

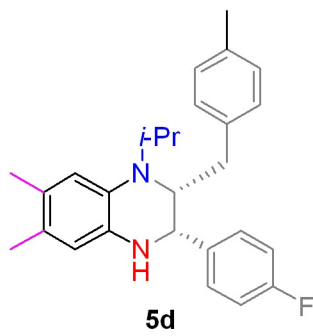

—118.49

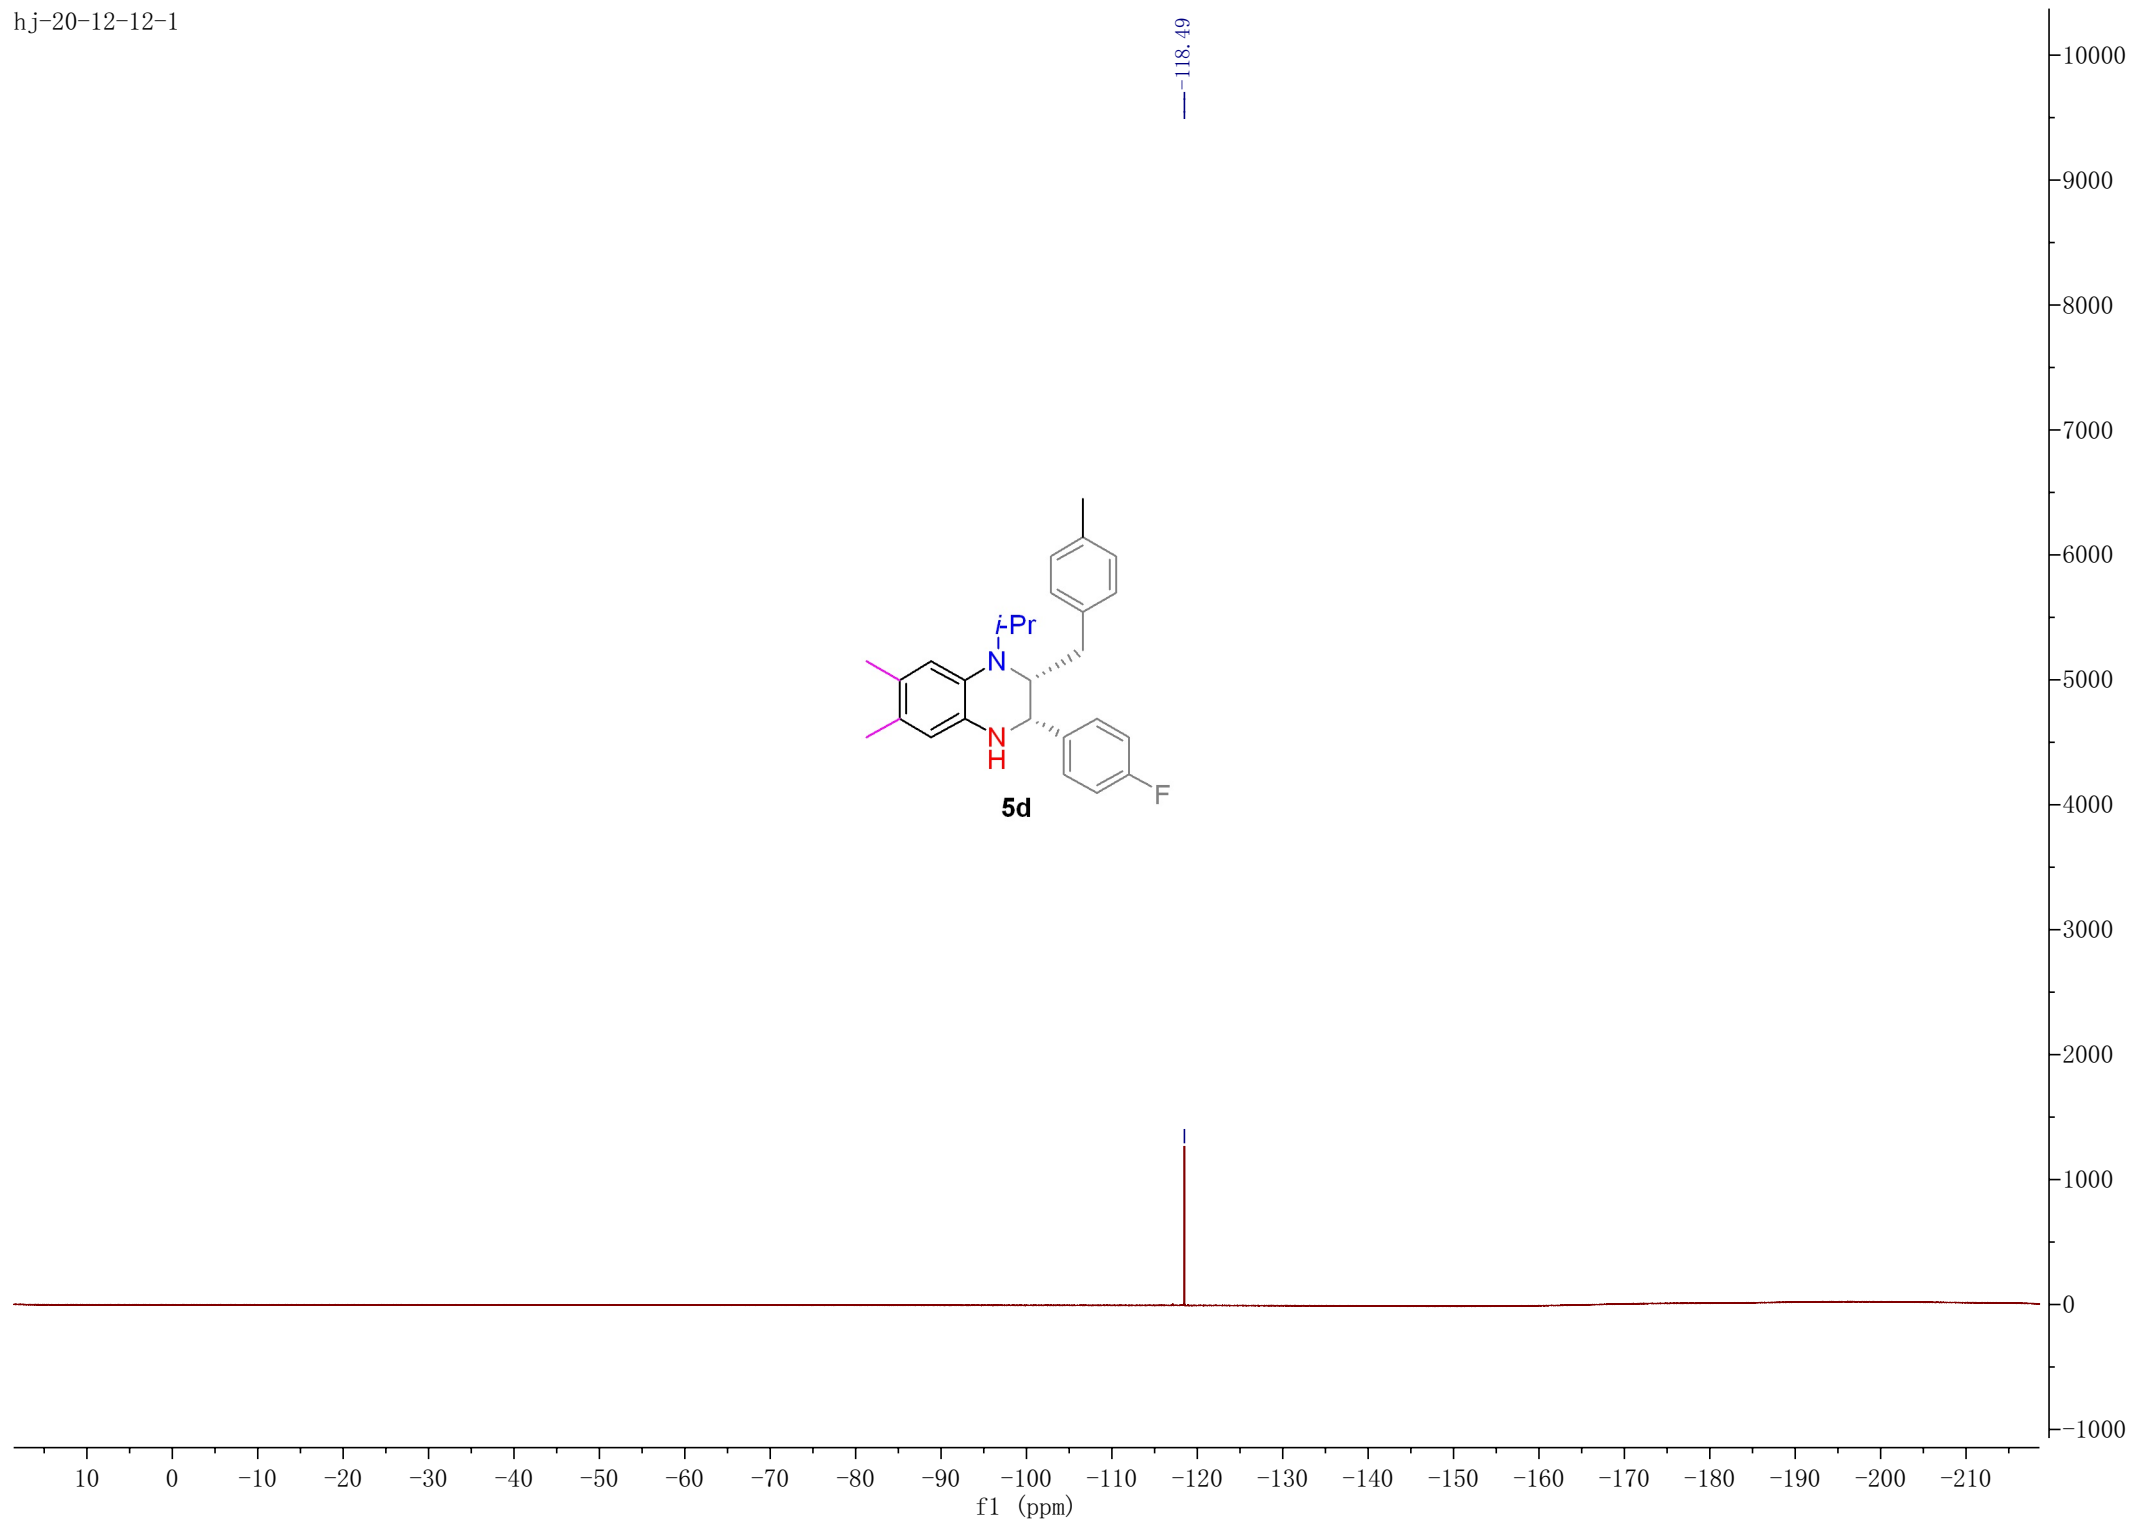



7.48  
7.47  
7.46  
7.45  
7.18  
7.16  
7.14  
6.89  
6.87  
6.85  
6.83  
6.82  
6.81  
6.80  
6.75  
6.58

4.27  
3.86  
3.37

2.35  
2.35  
2.33  
2.25  
2.24

1.08  
1.06

0.48  
0.46

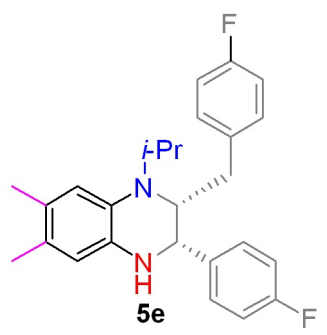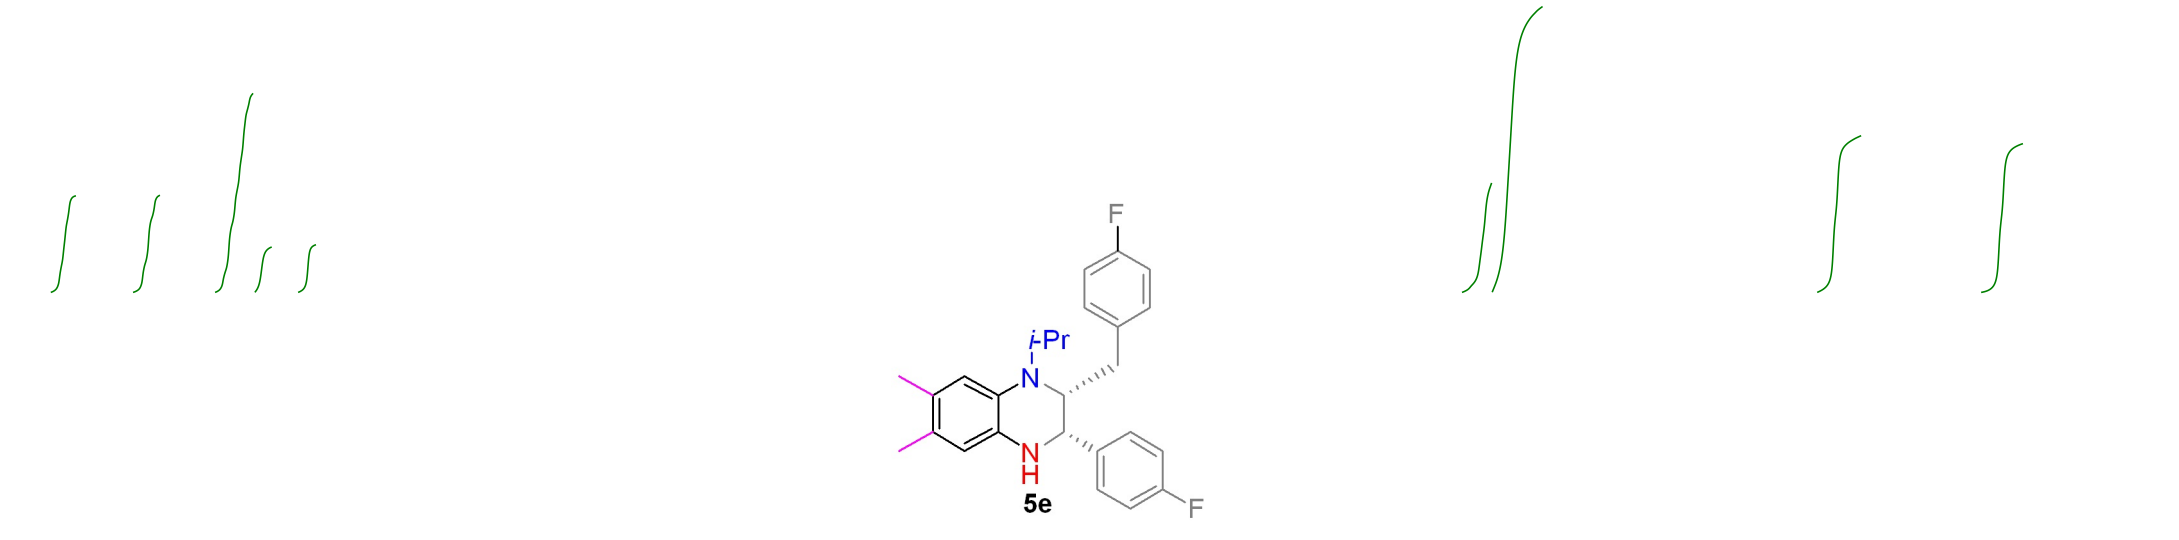

1.95  
1.96  
4.01  
0.92  
0.96  
0.97  
1.63  
0.95  
2.21  
5.76  
3.16  
3.00

163.34  
163.29  
162.56  
160.85  
160.15

136.26  
136.24  
132.75  
132.71  
131.38  
131.30  
130.58  
128.25  
128.18  
120.48  
116.81  
115.62  
115.40  
114.41  
114.20

58.43  
55.55  
53.71

31.70  
29.72

20.97  
19.45  
19.12

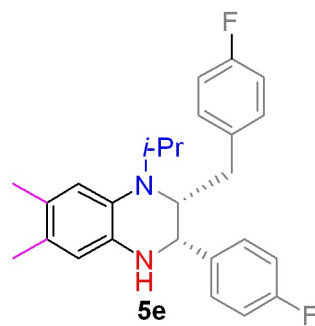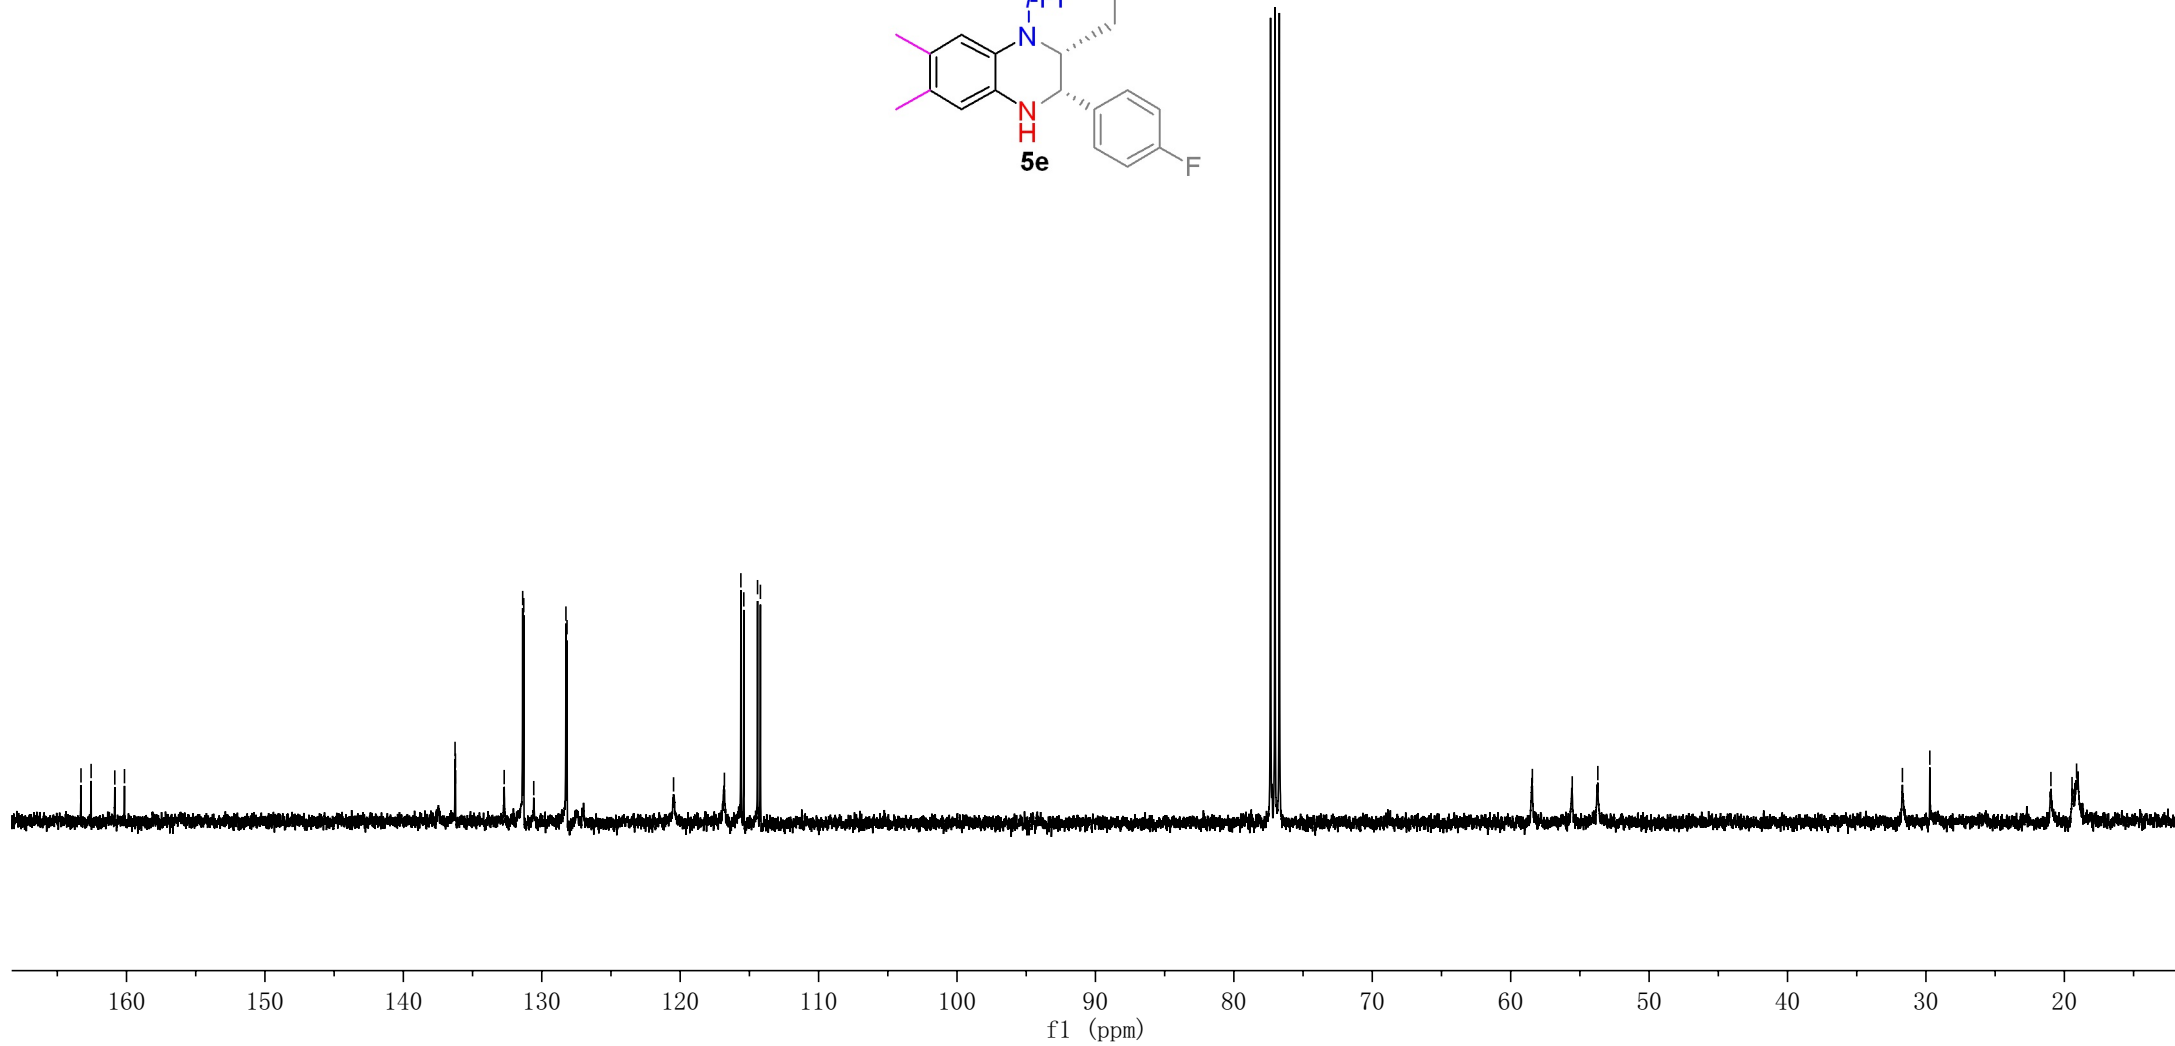

hj-20-12-12-2

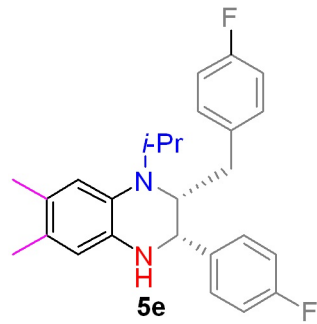

-115.32  
-118.26

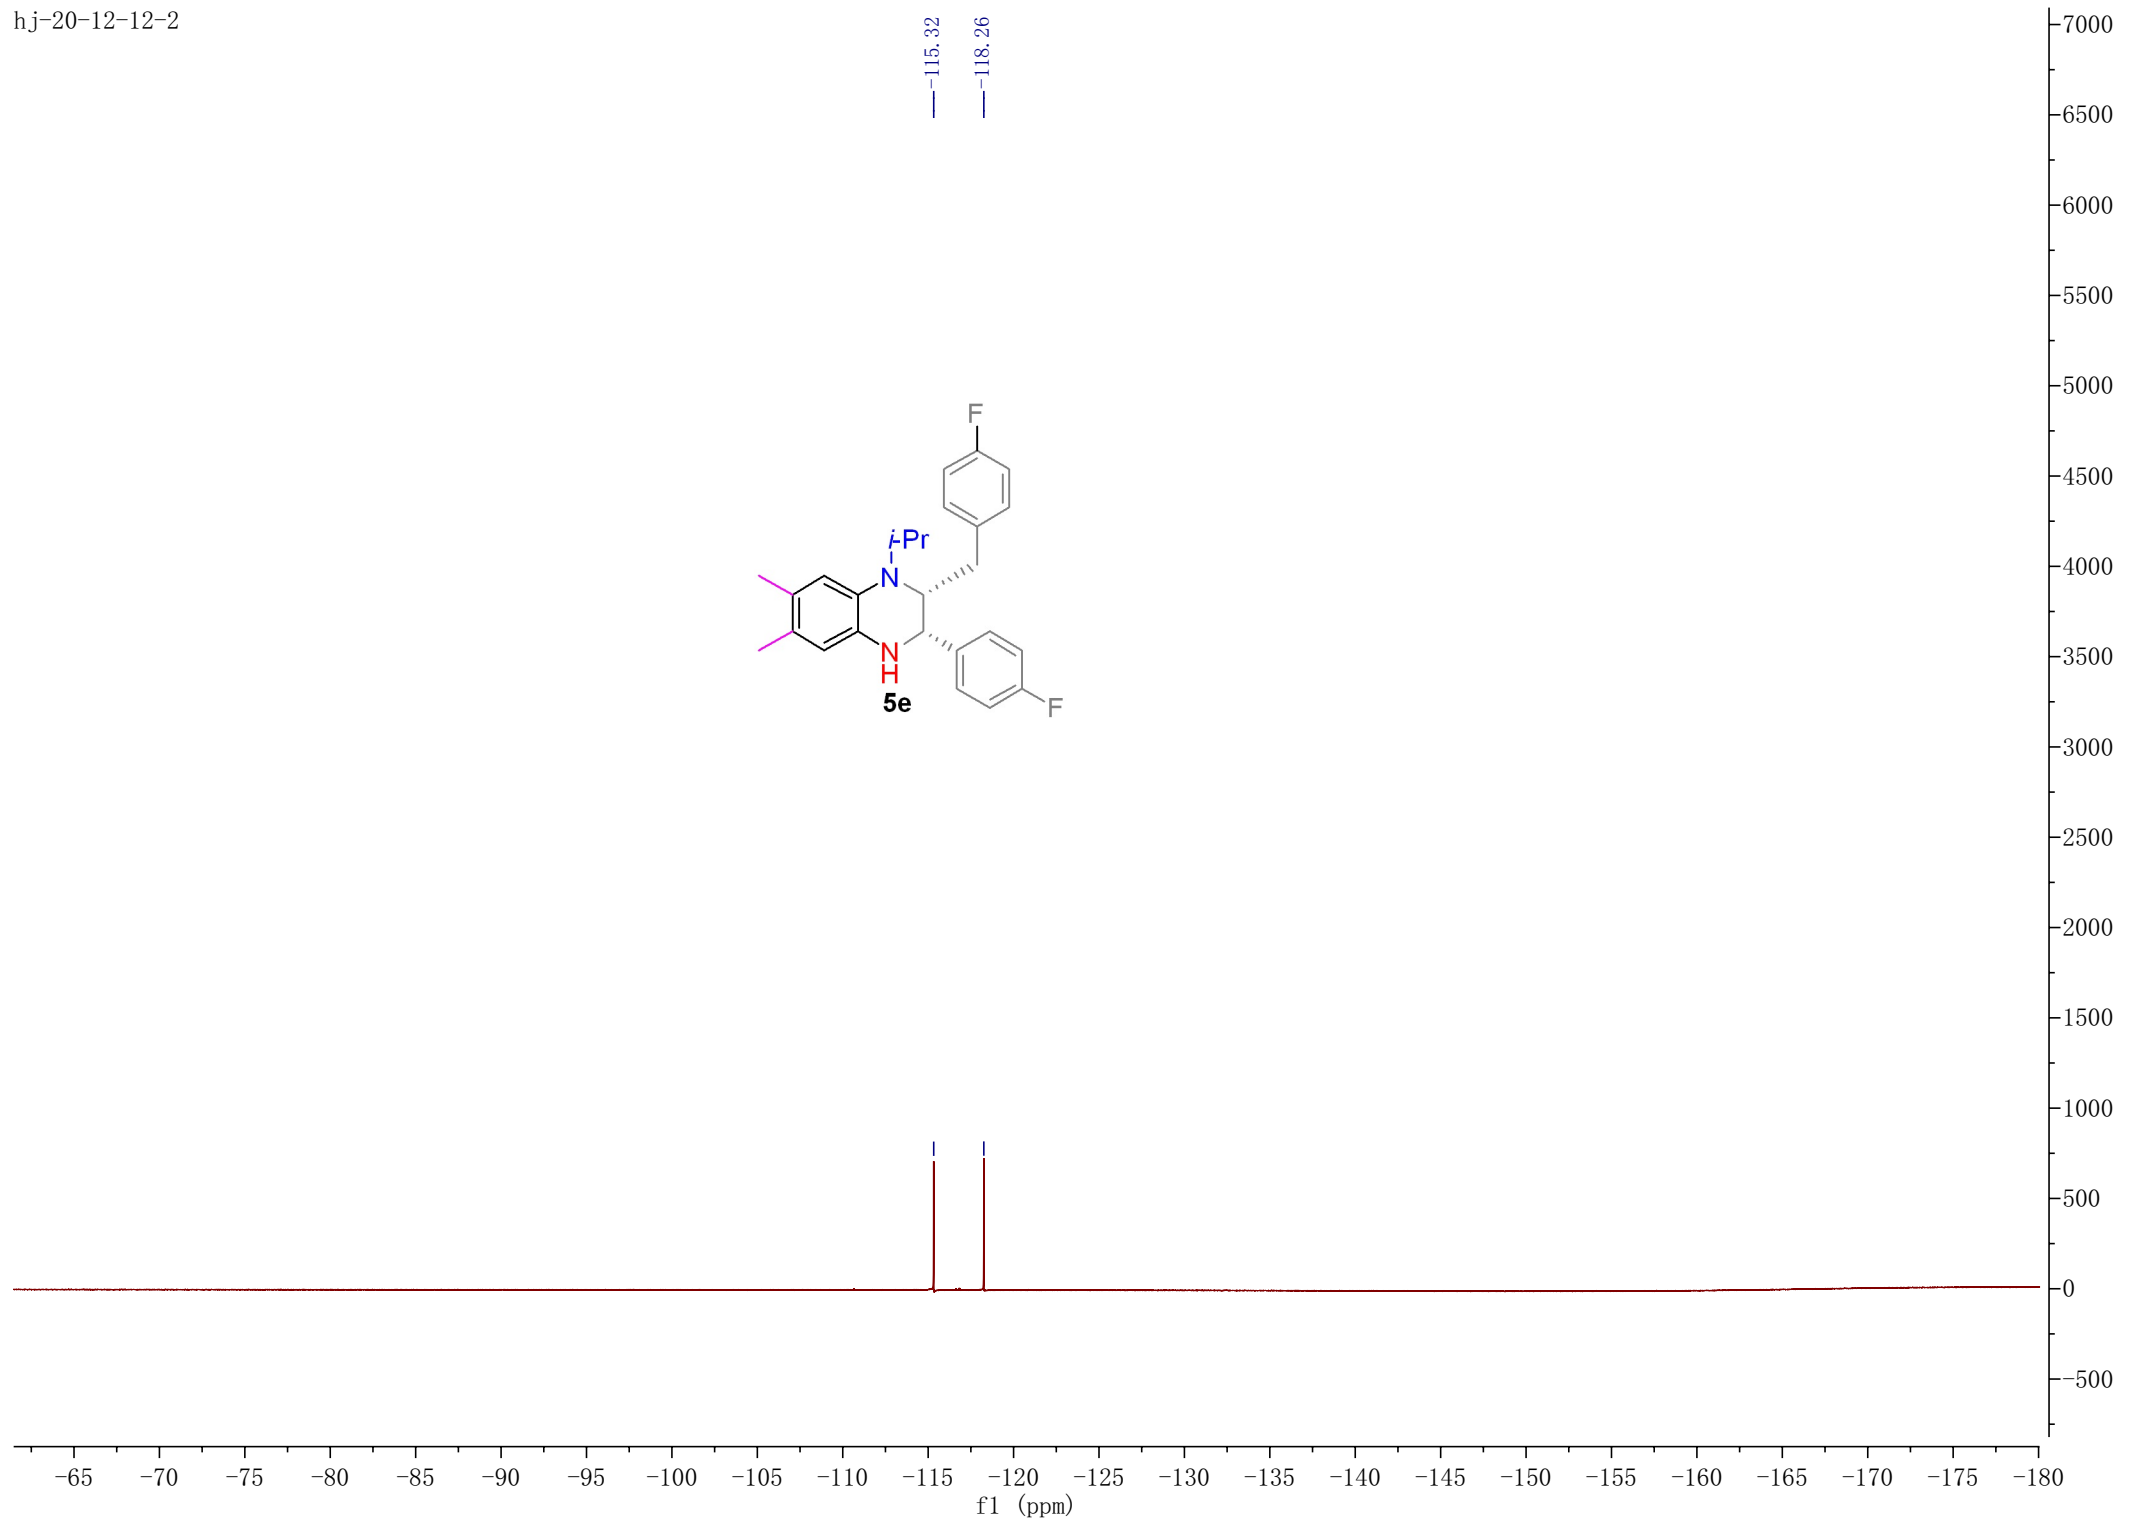

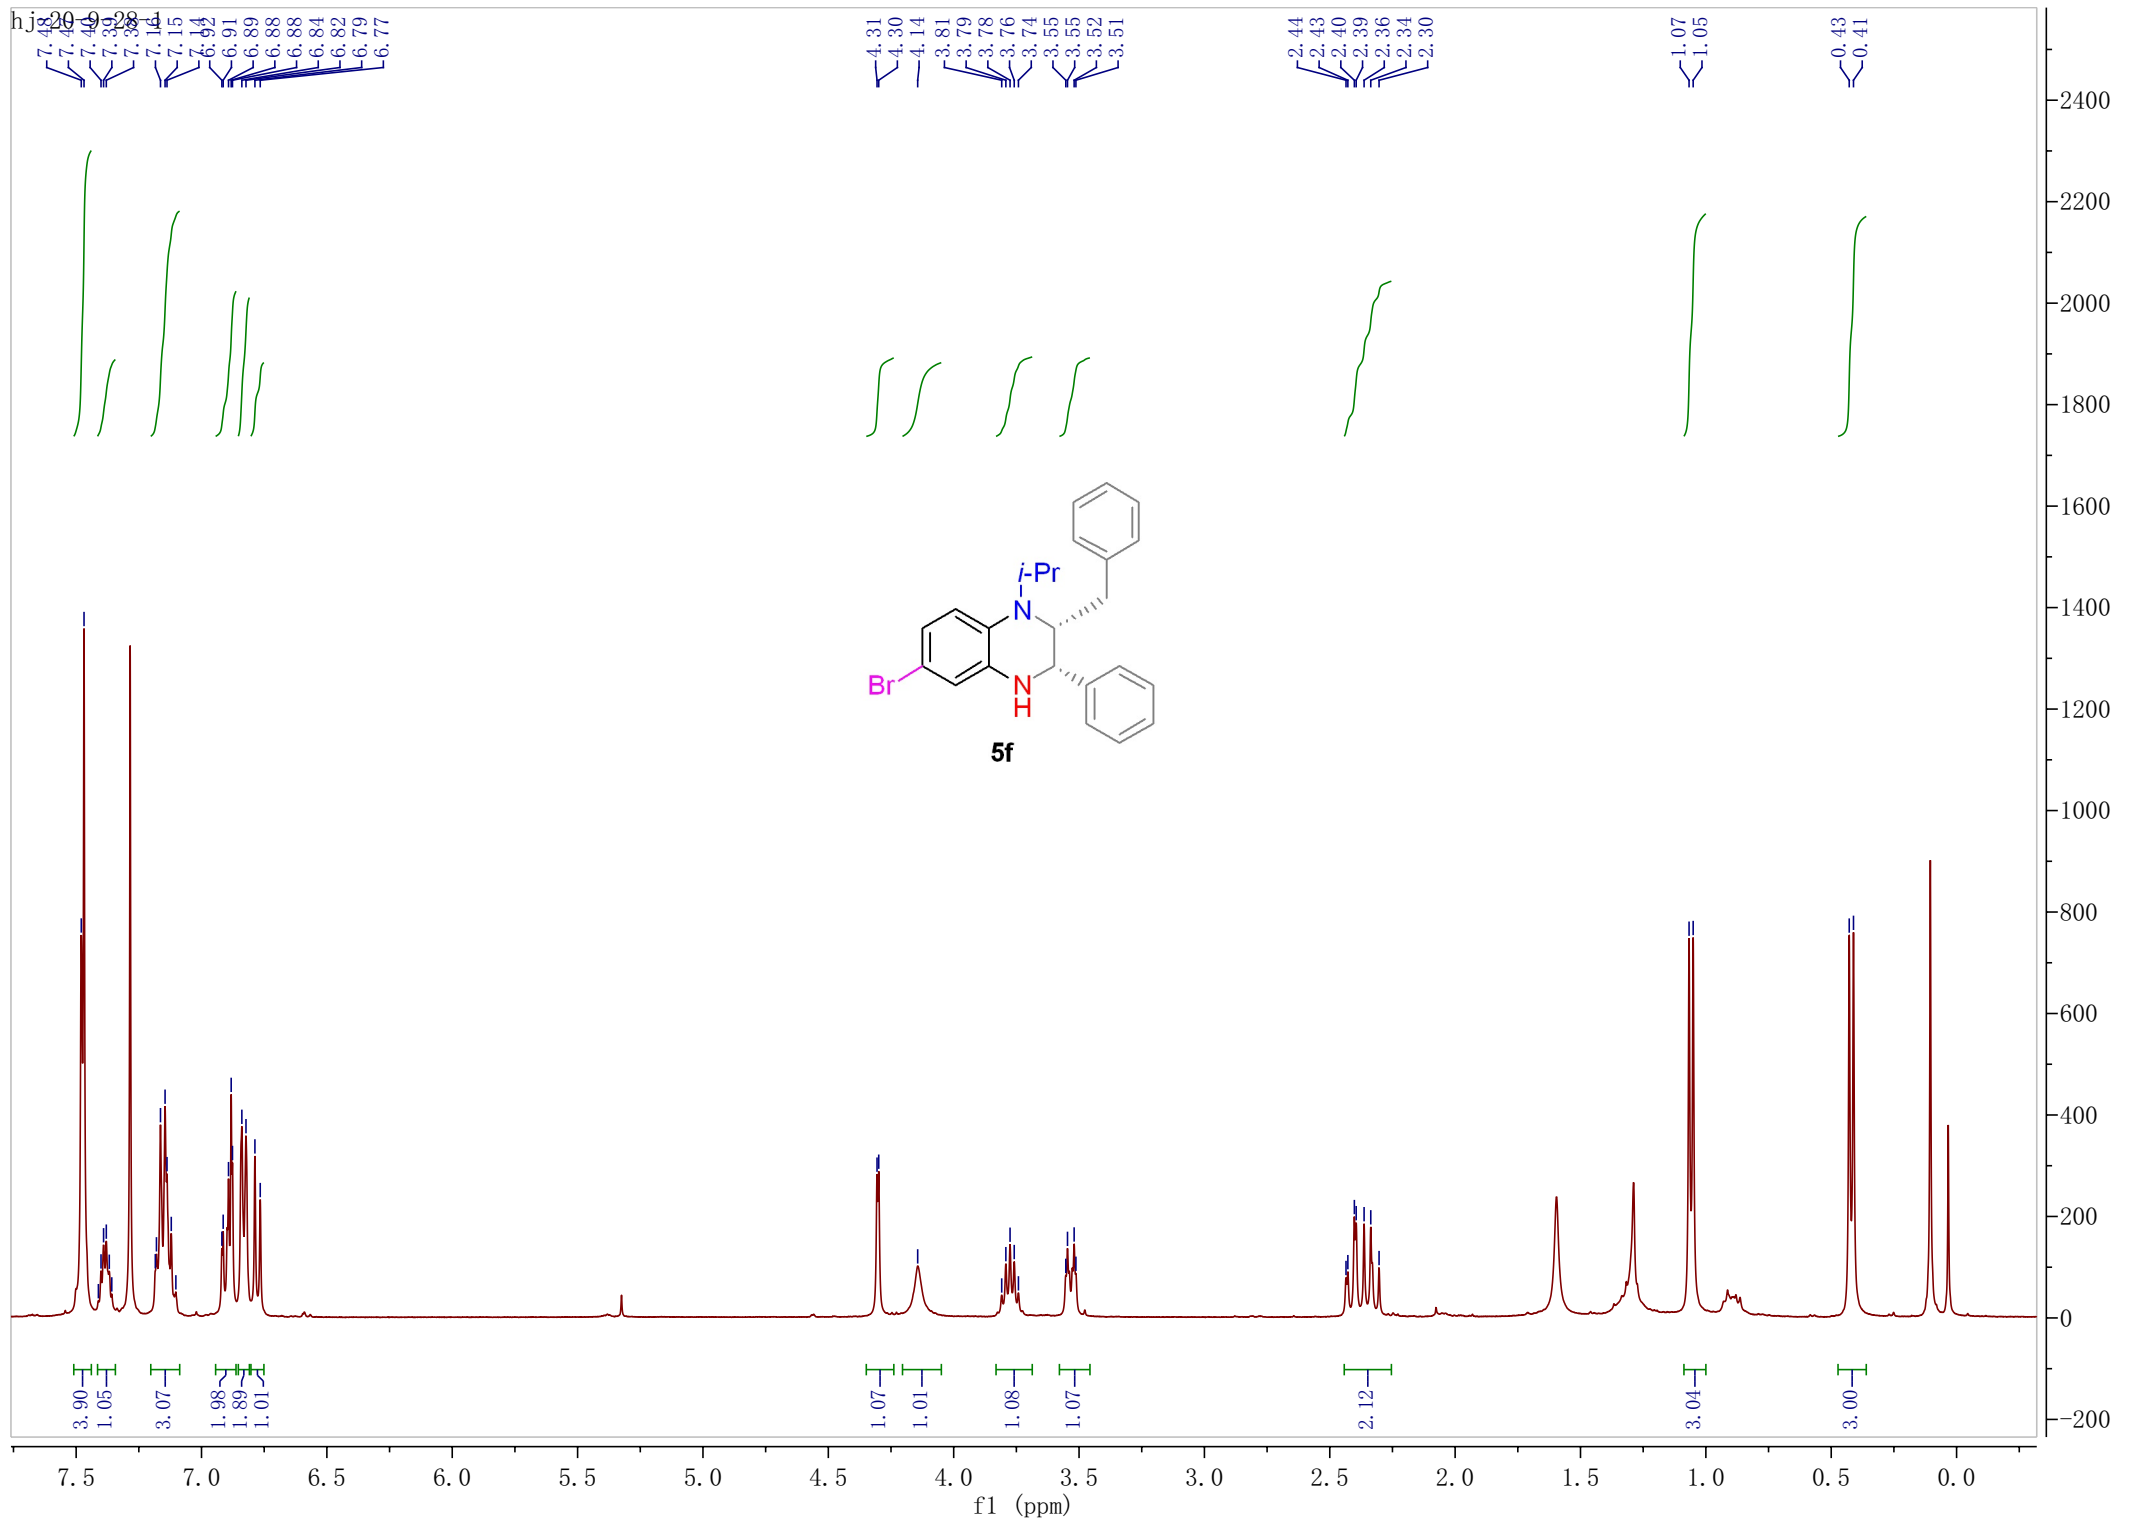

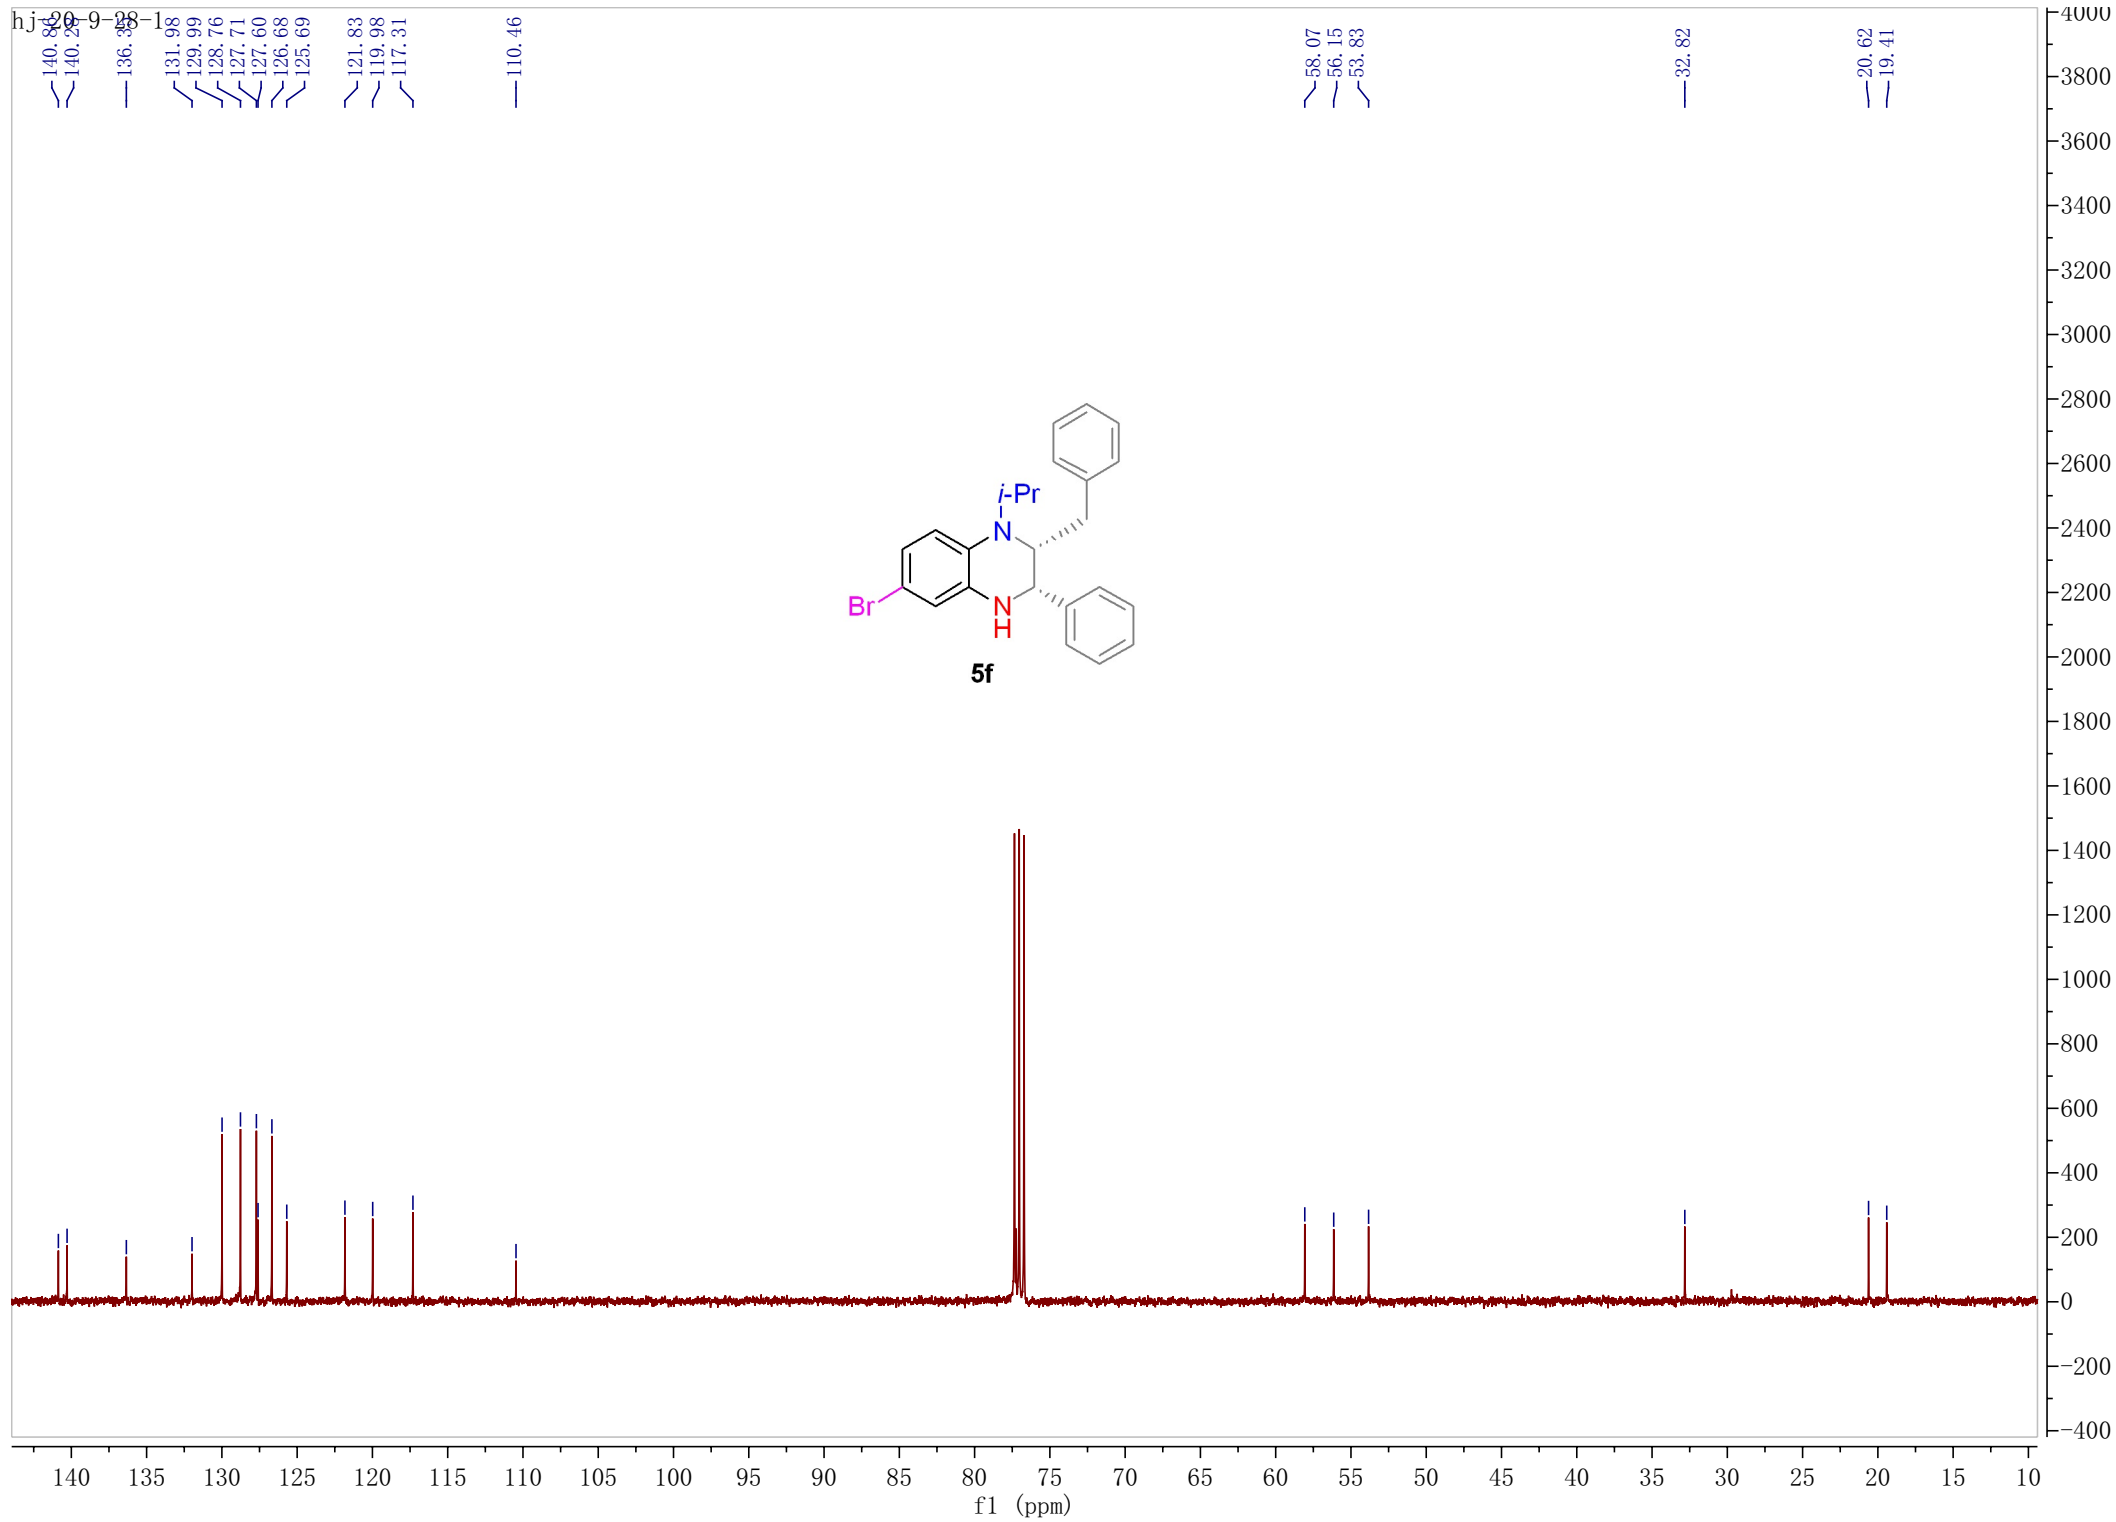

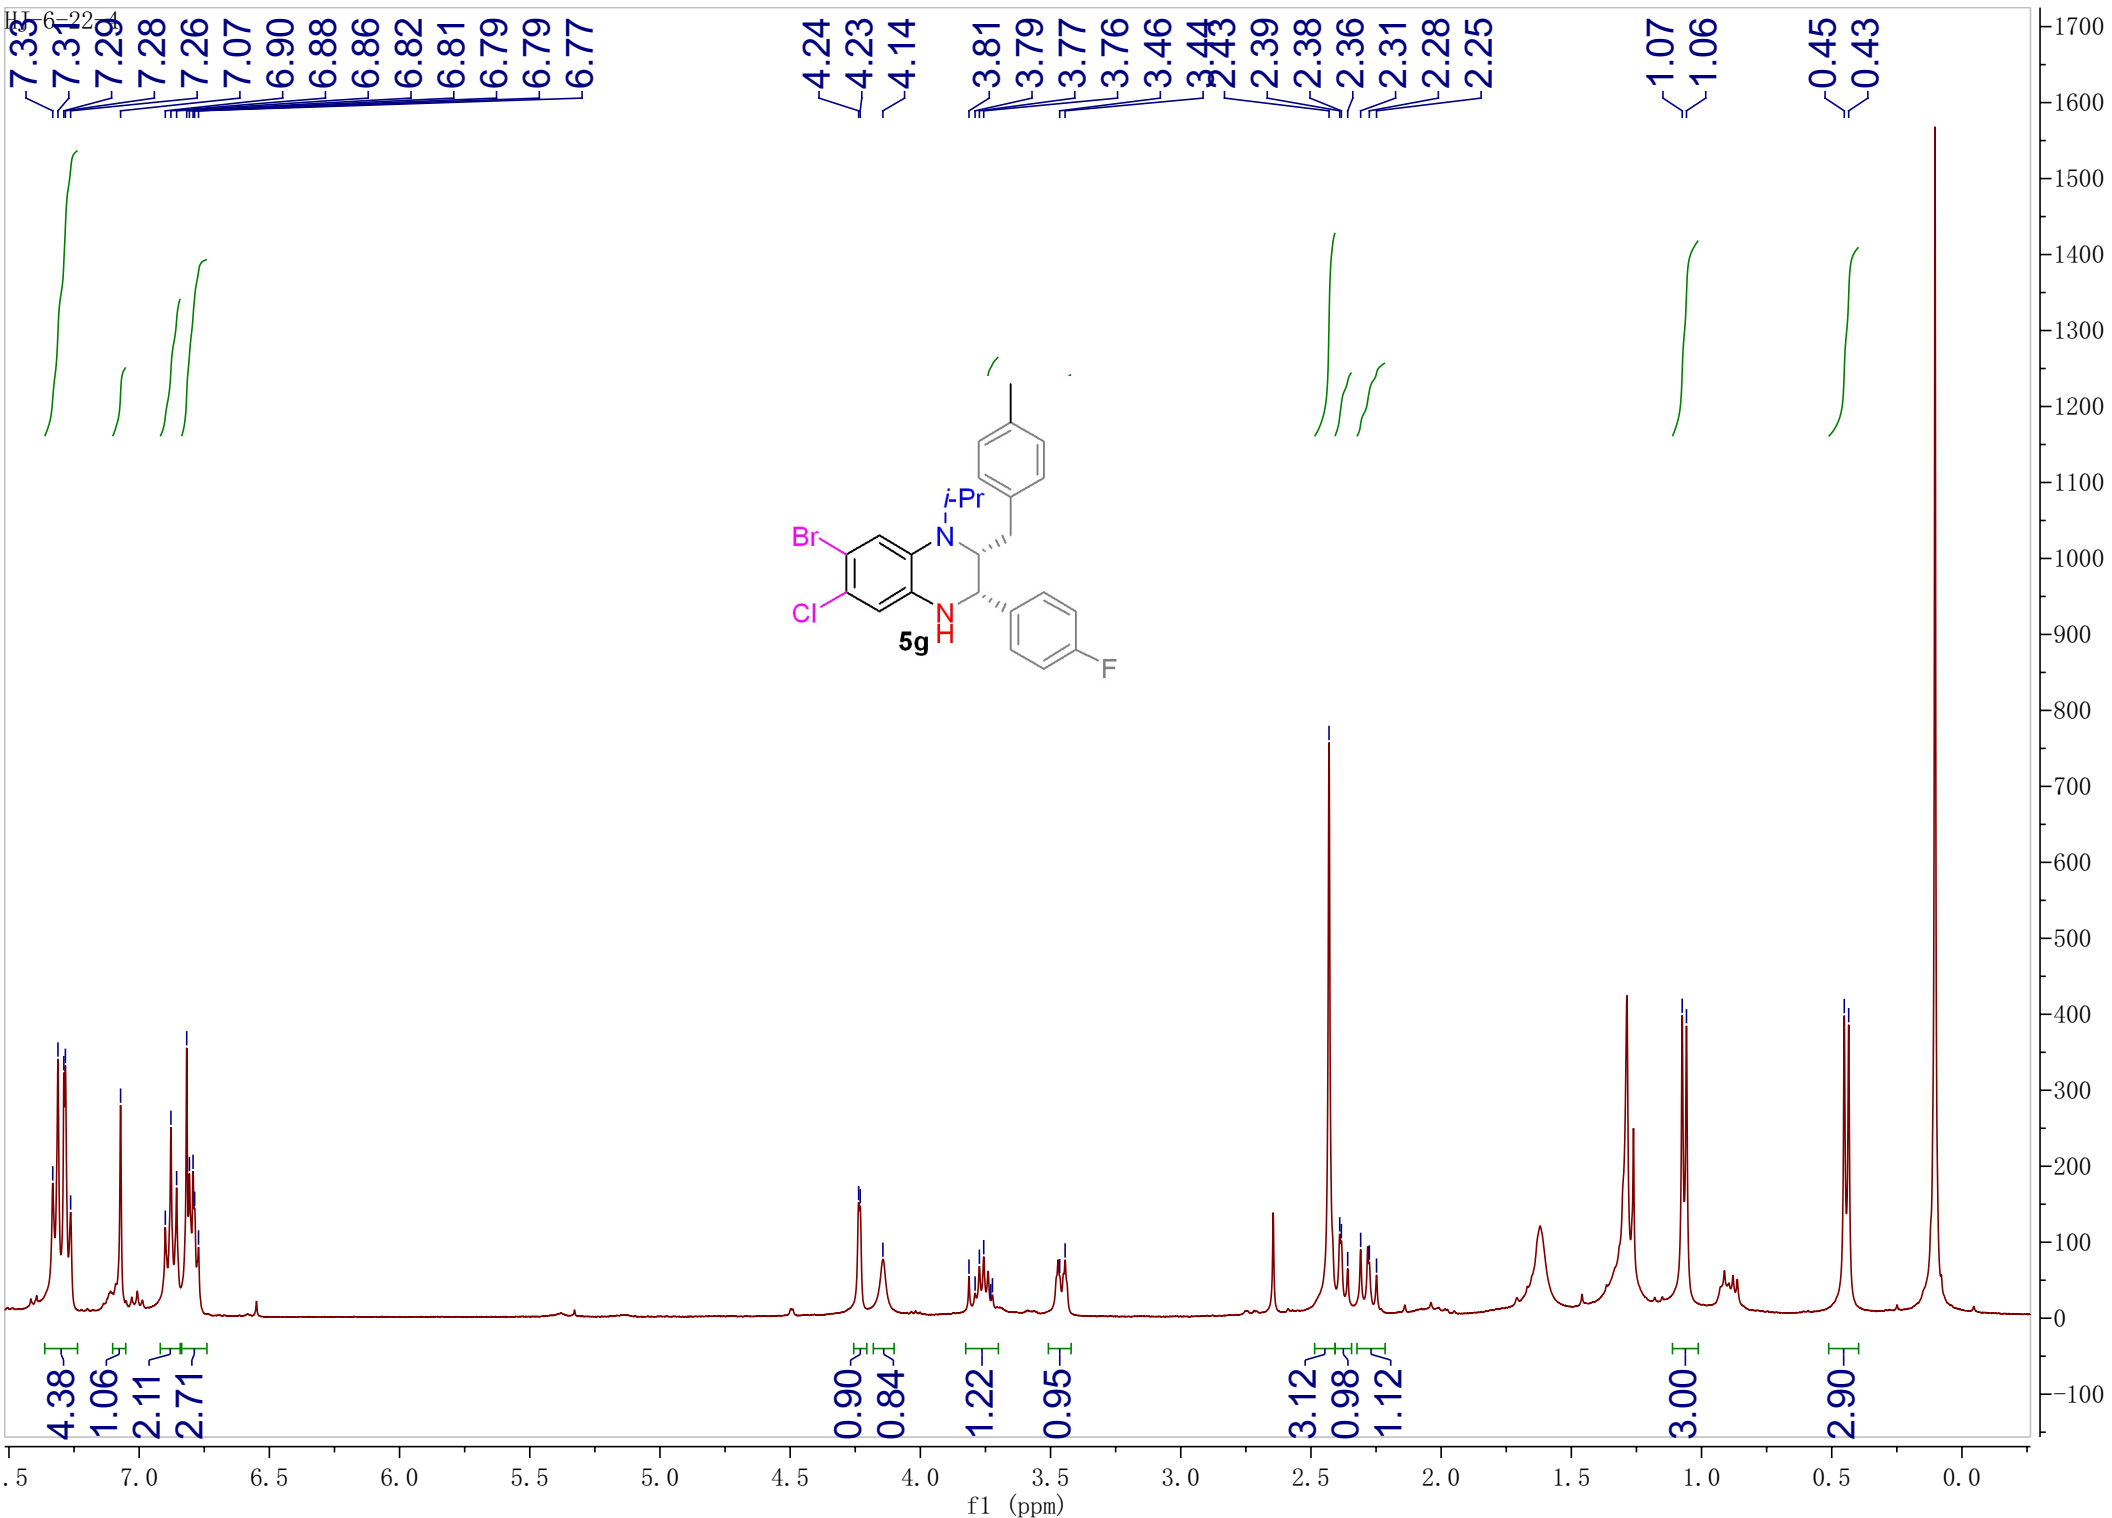

HJ-6-22-4

162.66  
160.24

137.49  
137.31  
135.67  
135.64  
135.41  
132.91  
131.28  
131.21  
129.52  
126.47  
122.92  
122.29  
115.45  
114.67  
114.46  
110.11

57.82  
55.92  
54.09

32.04

21.14  
20.60  
19.42

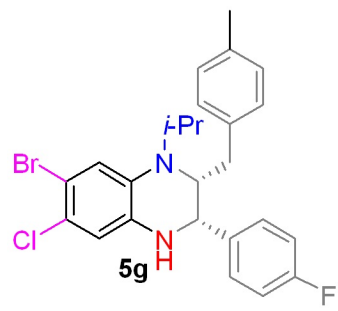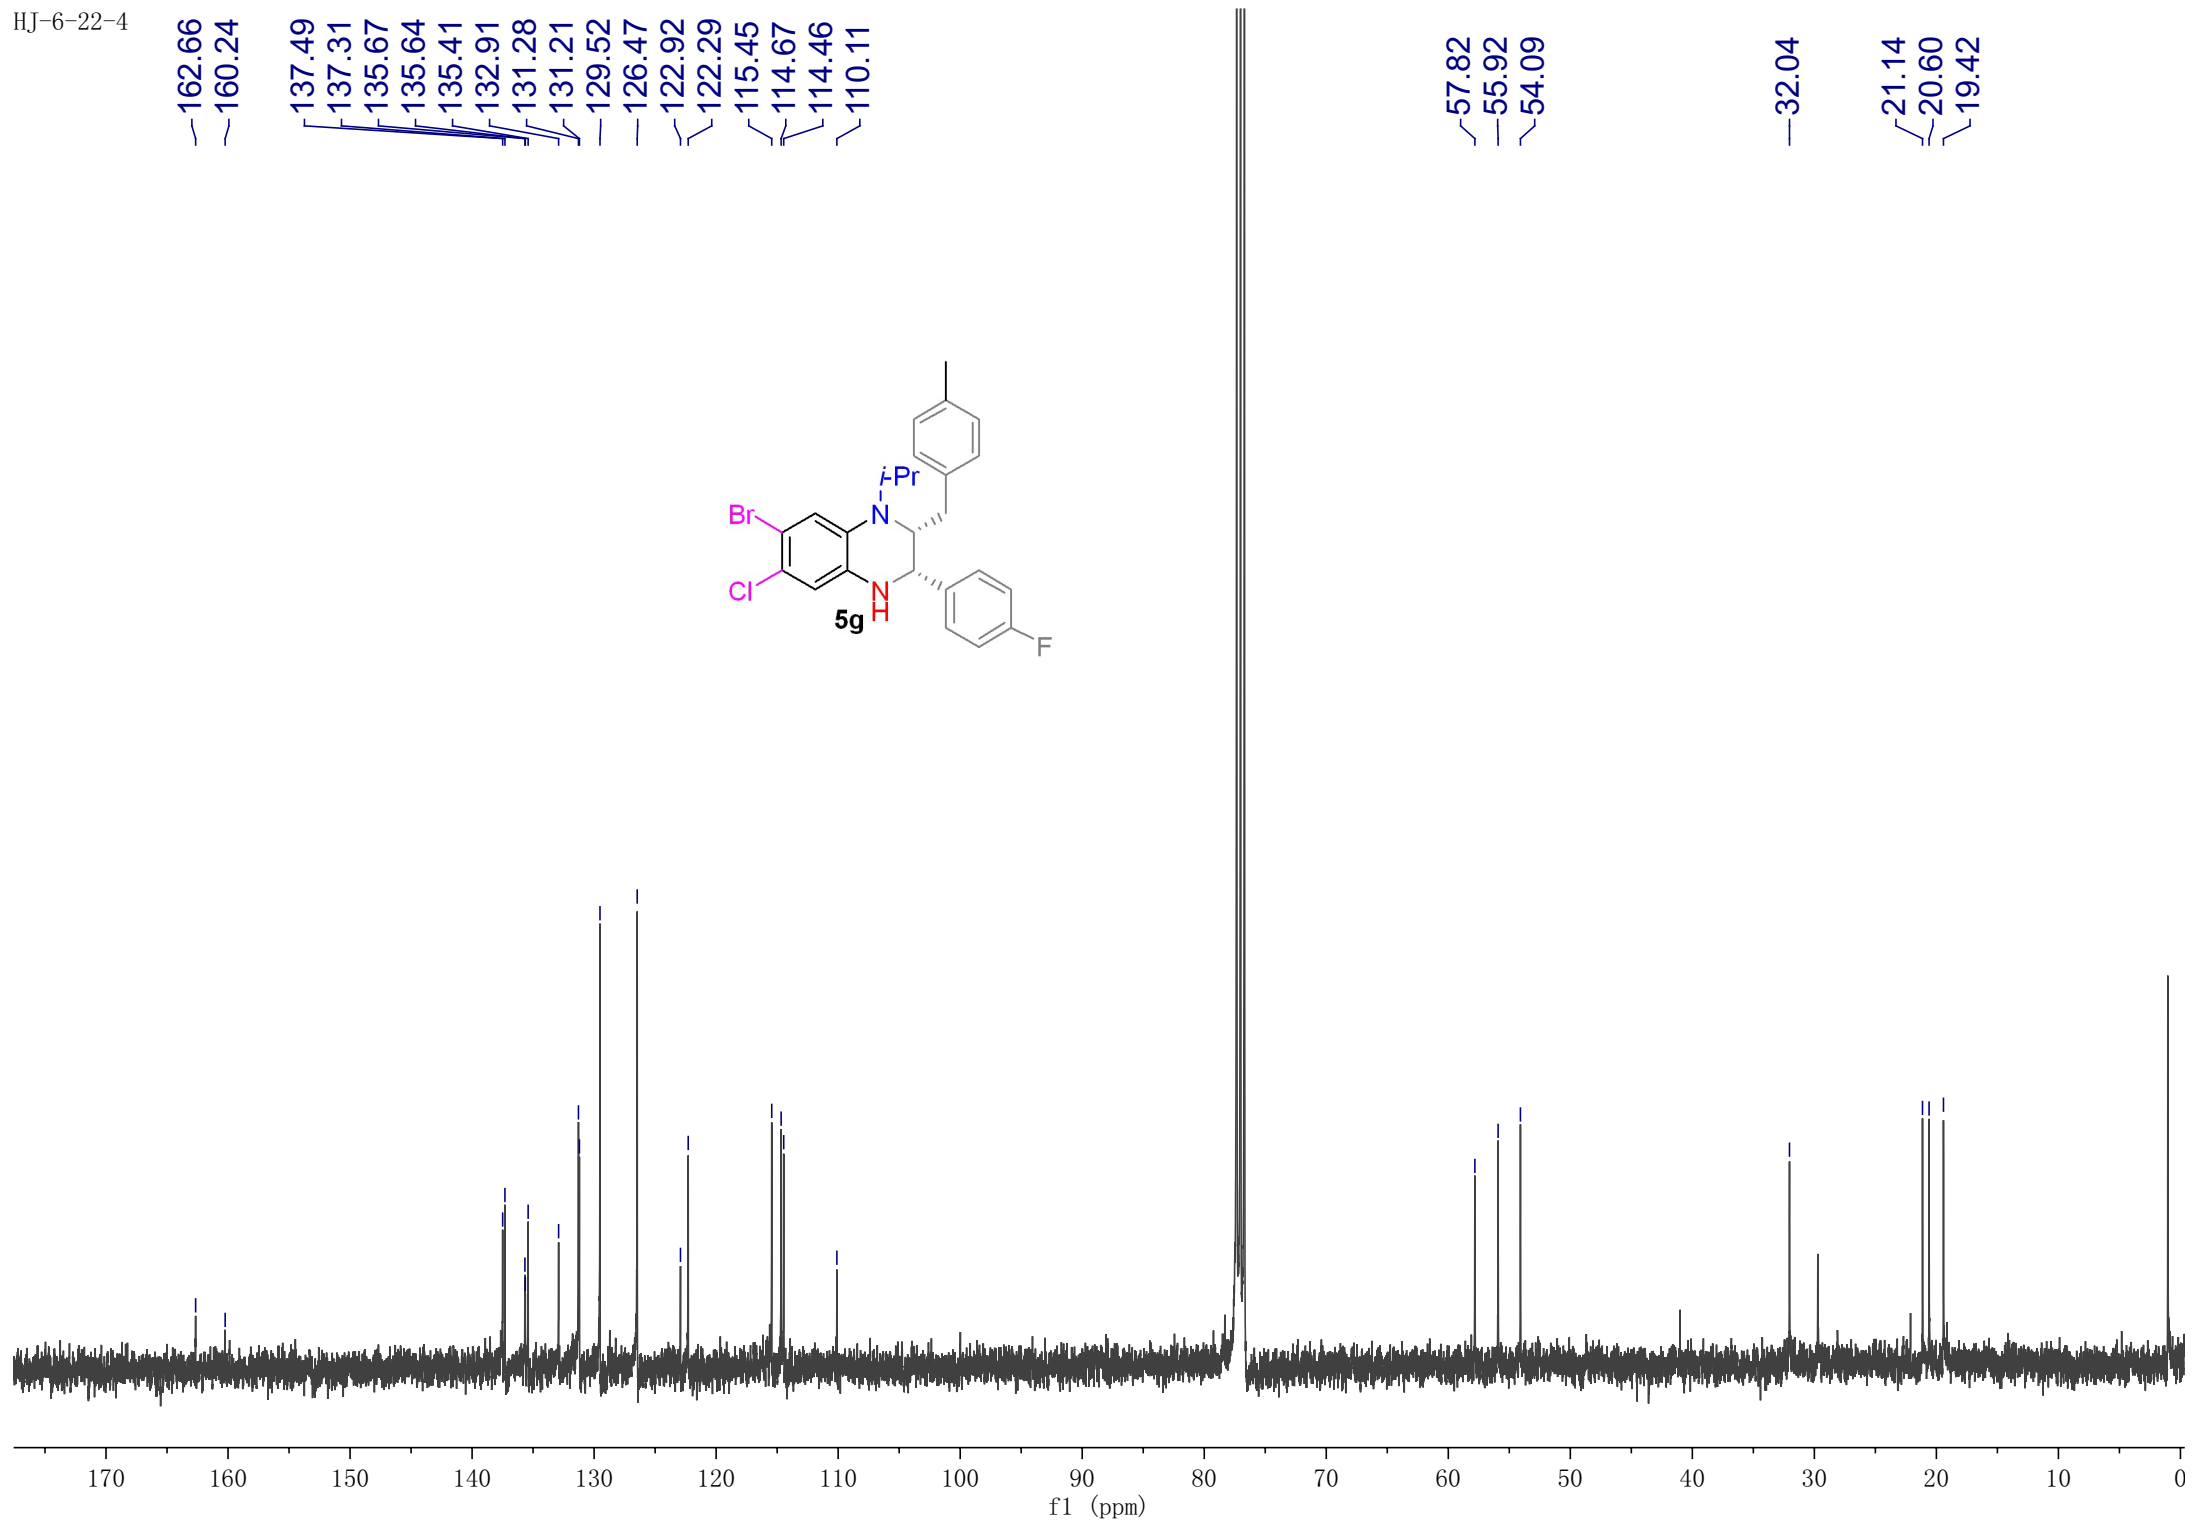

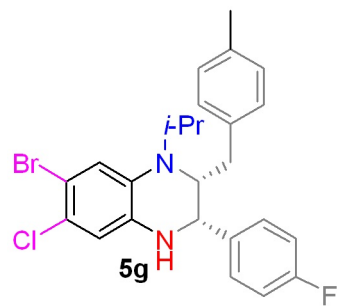

-117.72

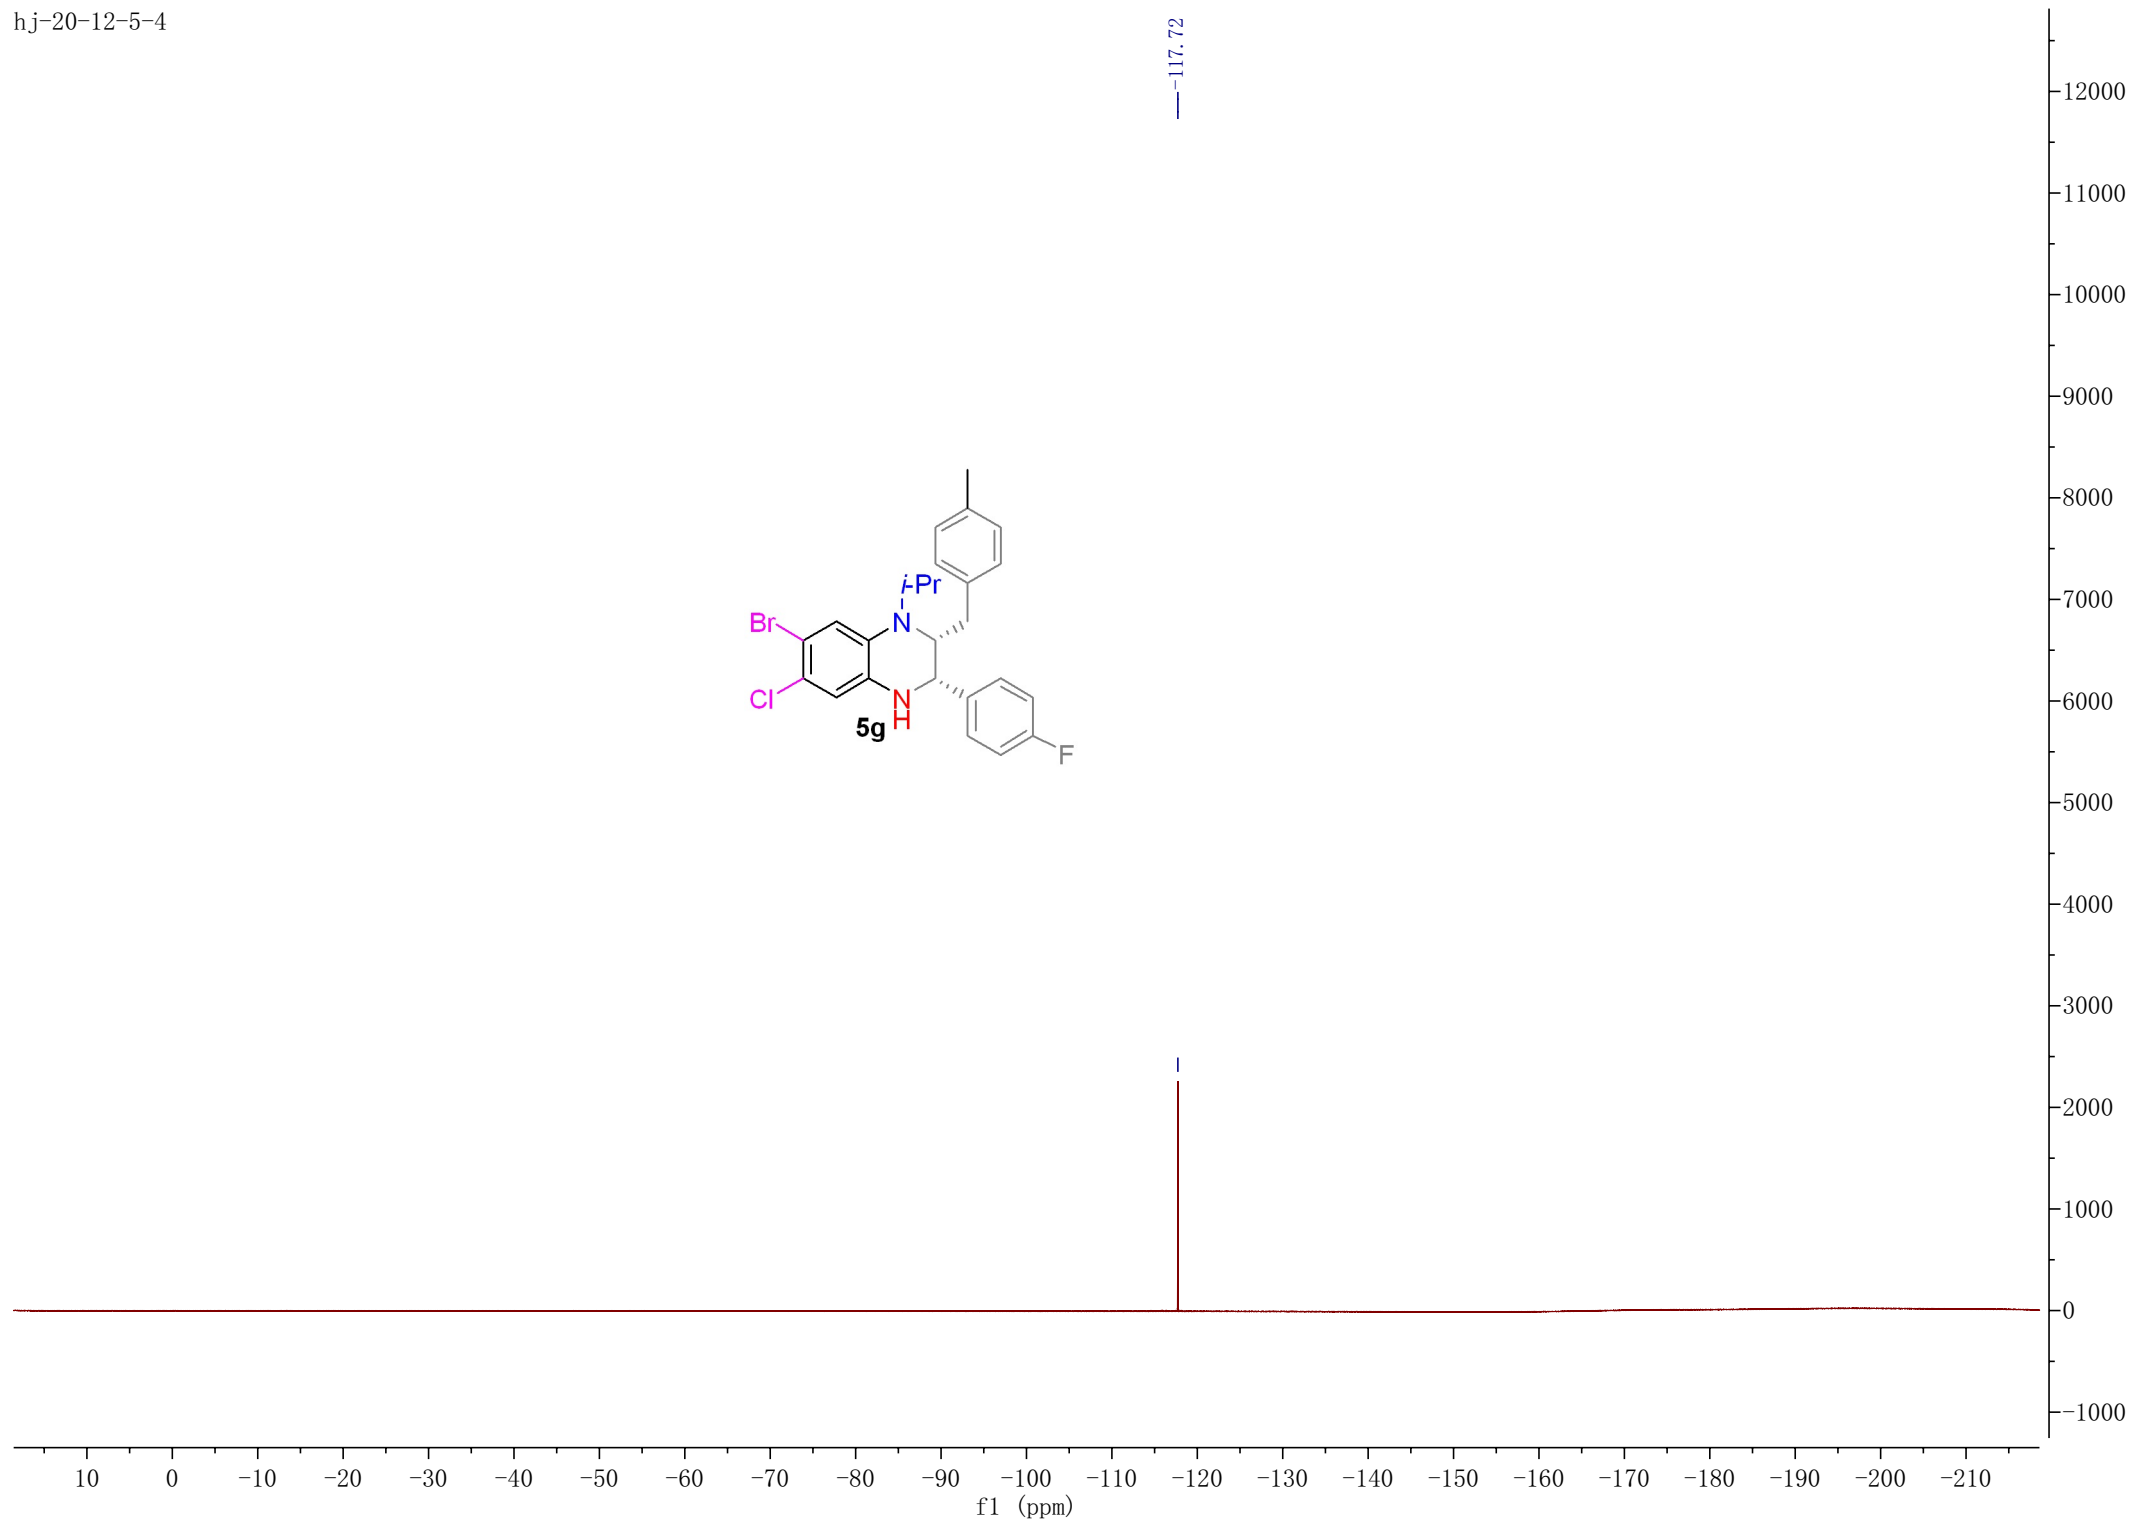



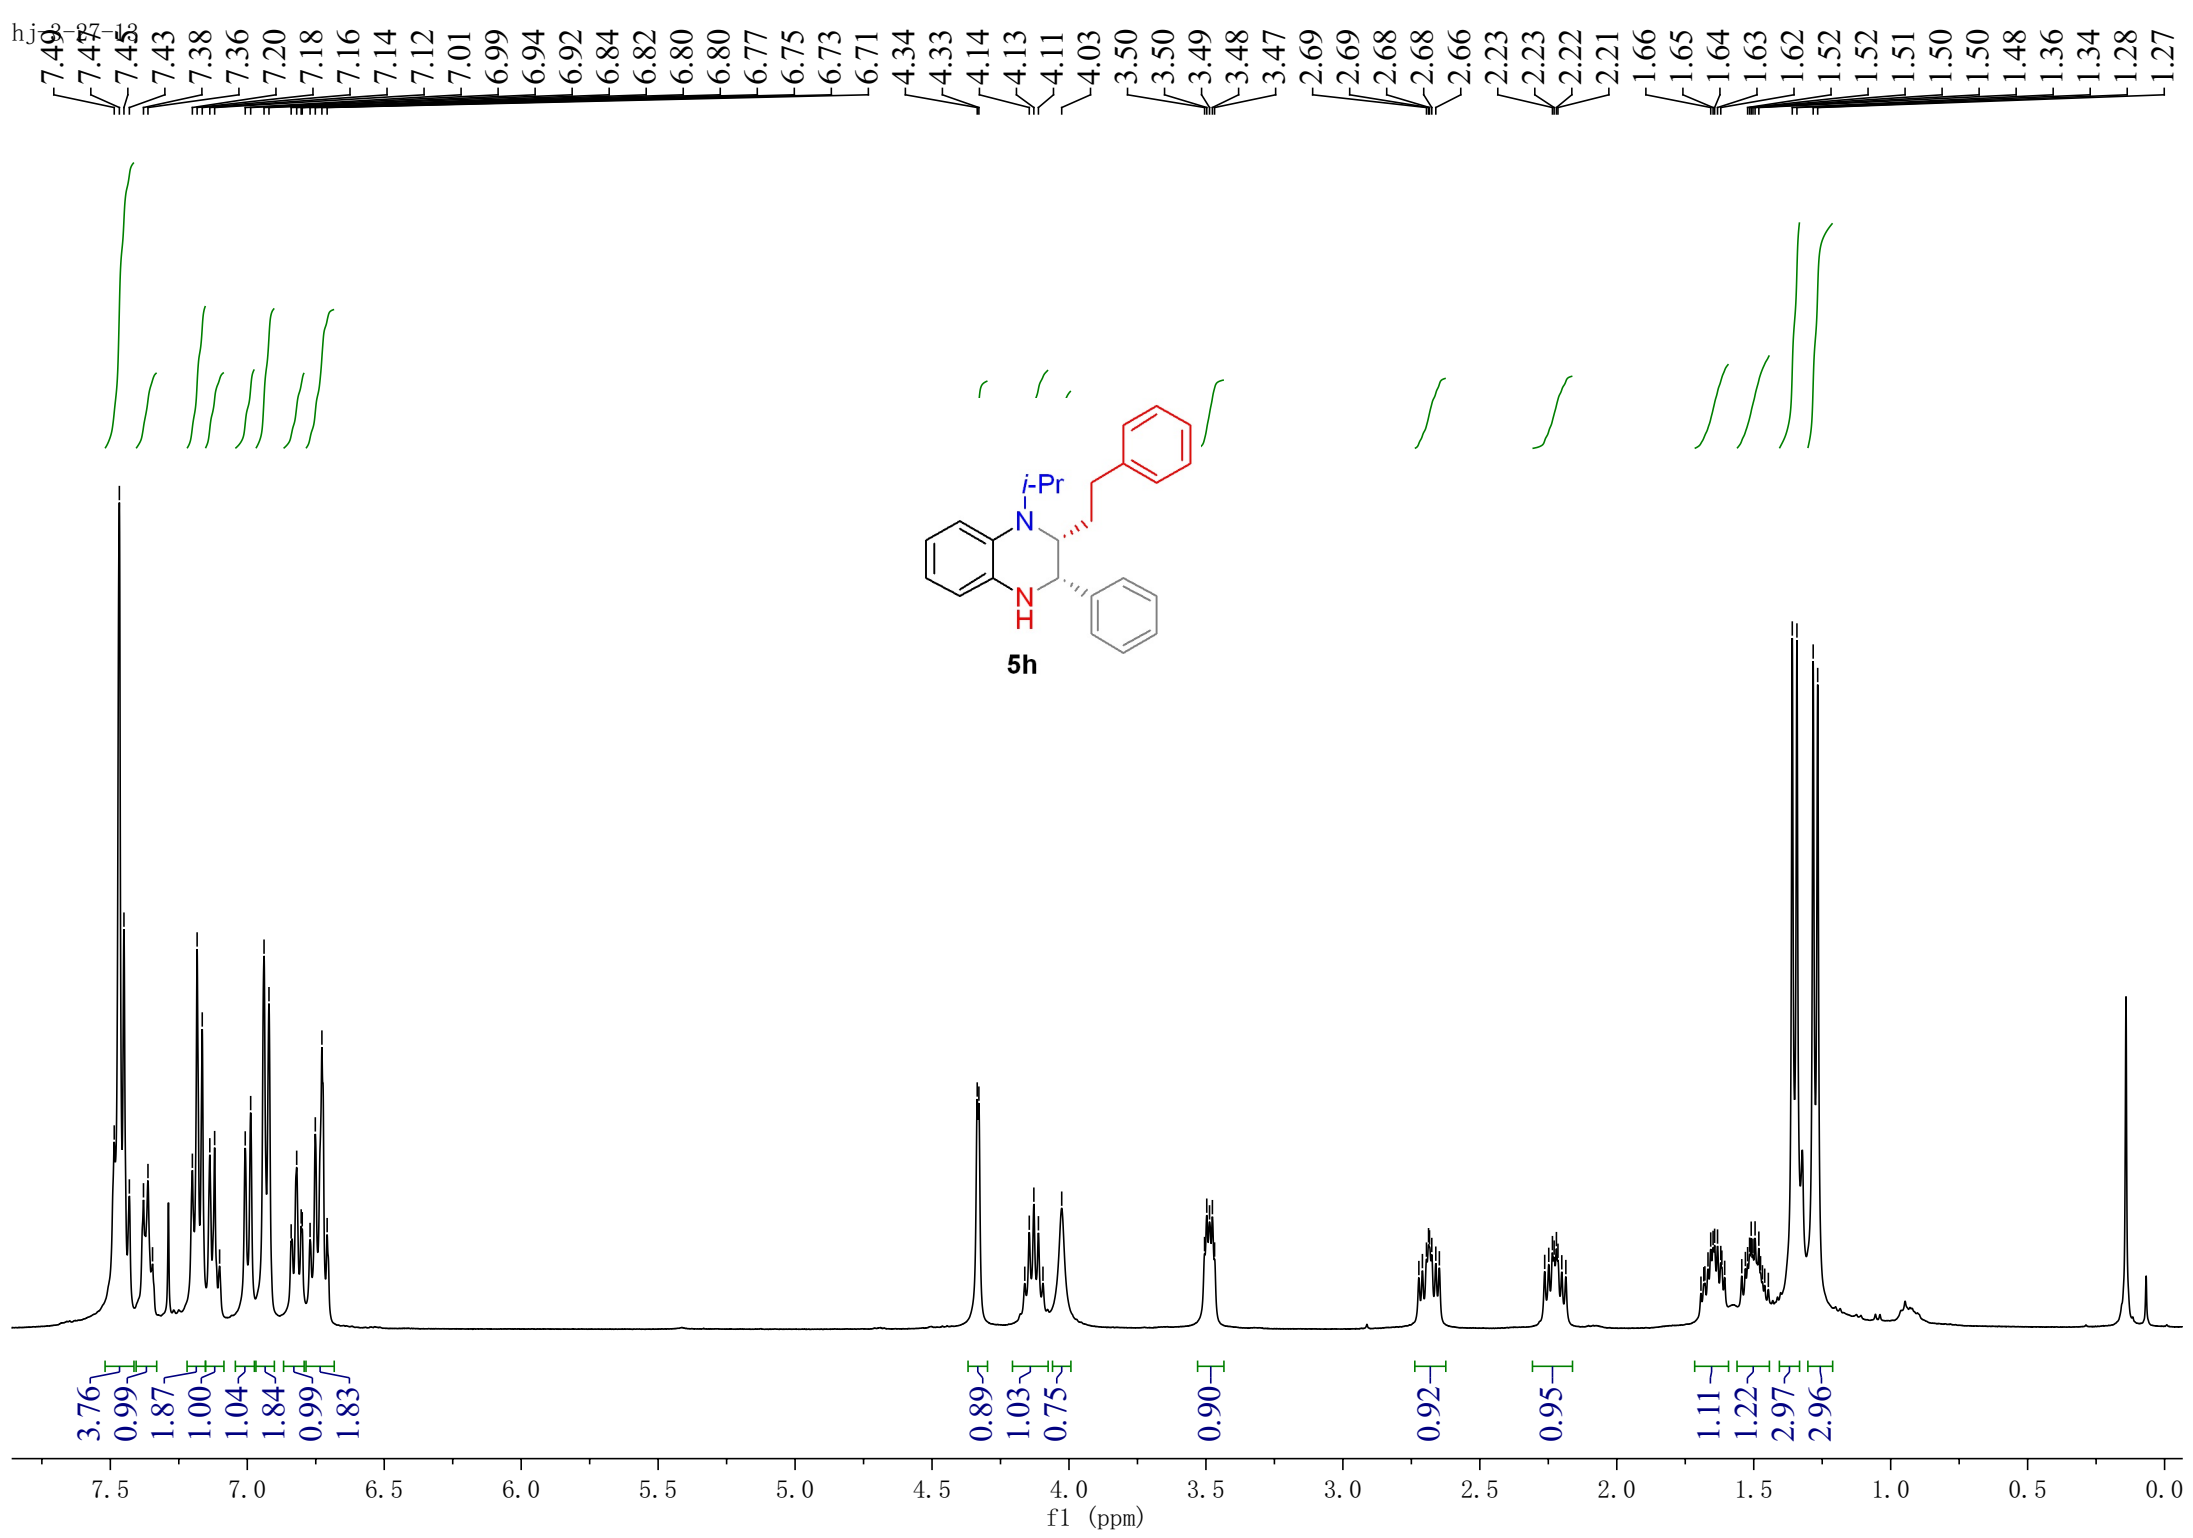

h j 1 2 7 13

~142.61  
~141.37  
132.97  
128.60  
128.31  
128.09  
127.36  
126.85  
125.42  
119.05  
118.65  
118.23  
115.06

55.99  
55.37  
53.48

33.12  
29.07

22.24  
19.68

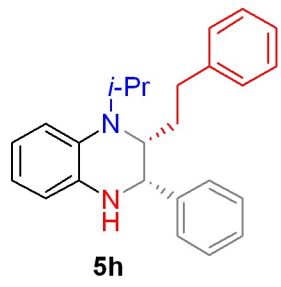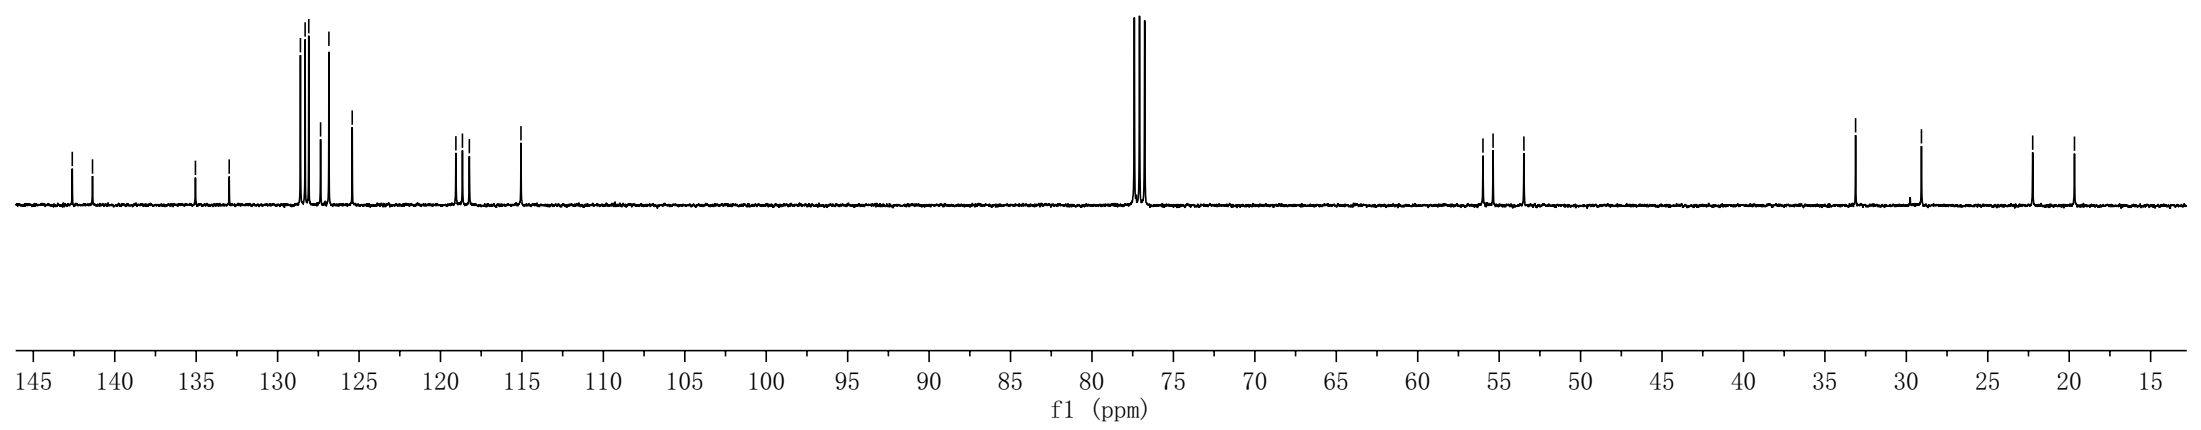

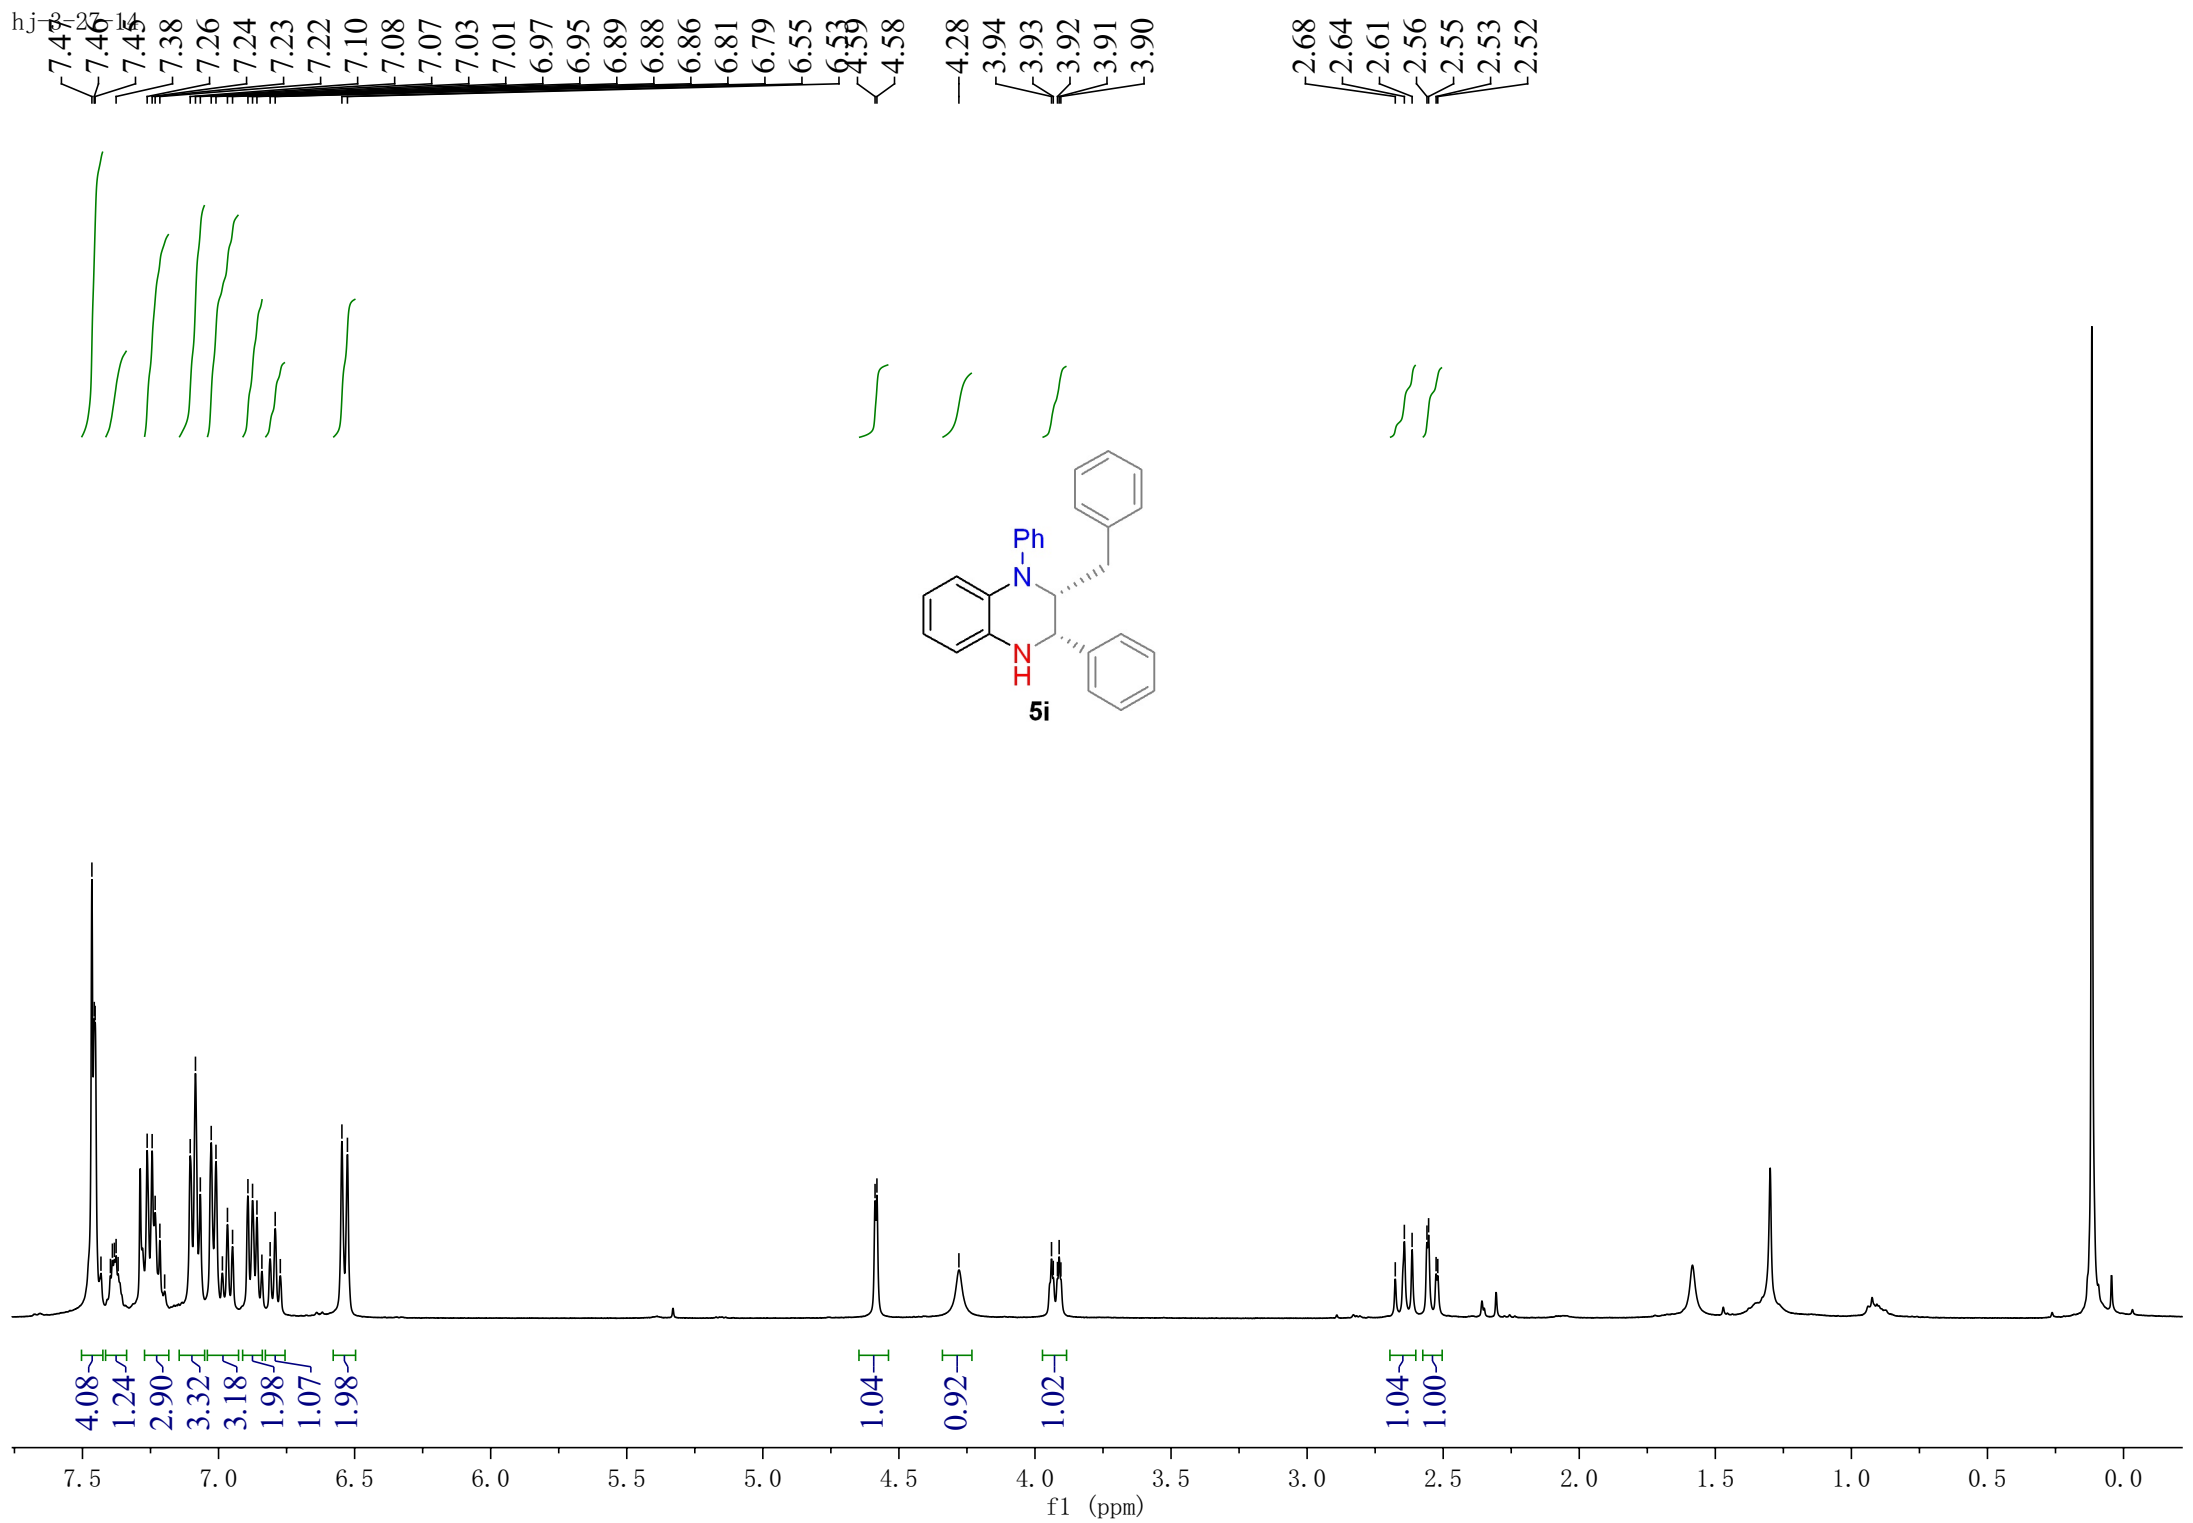

hja-27-14

150.42  
140.41  
140.08  
136.71  
129.81  
128.93  
128.71  
128.26  
127.91  
127.66  
126.92  
126.06  
123.37  
122.17  
121.63  
121.36  
118.79  
115.71

67.32

54.95

31.99

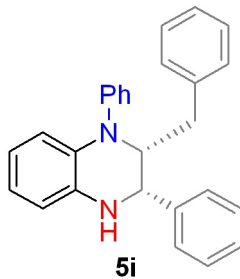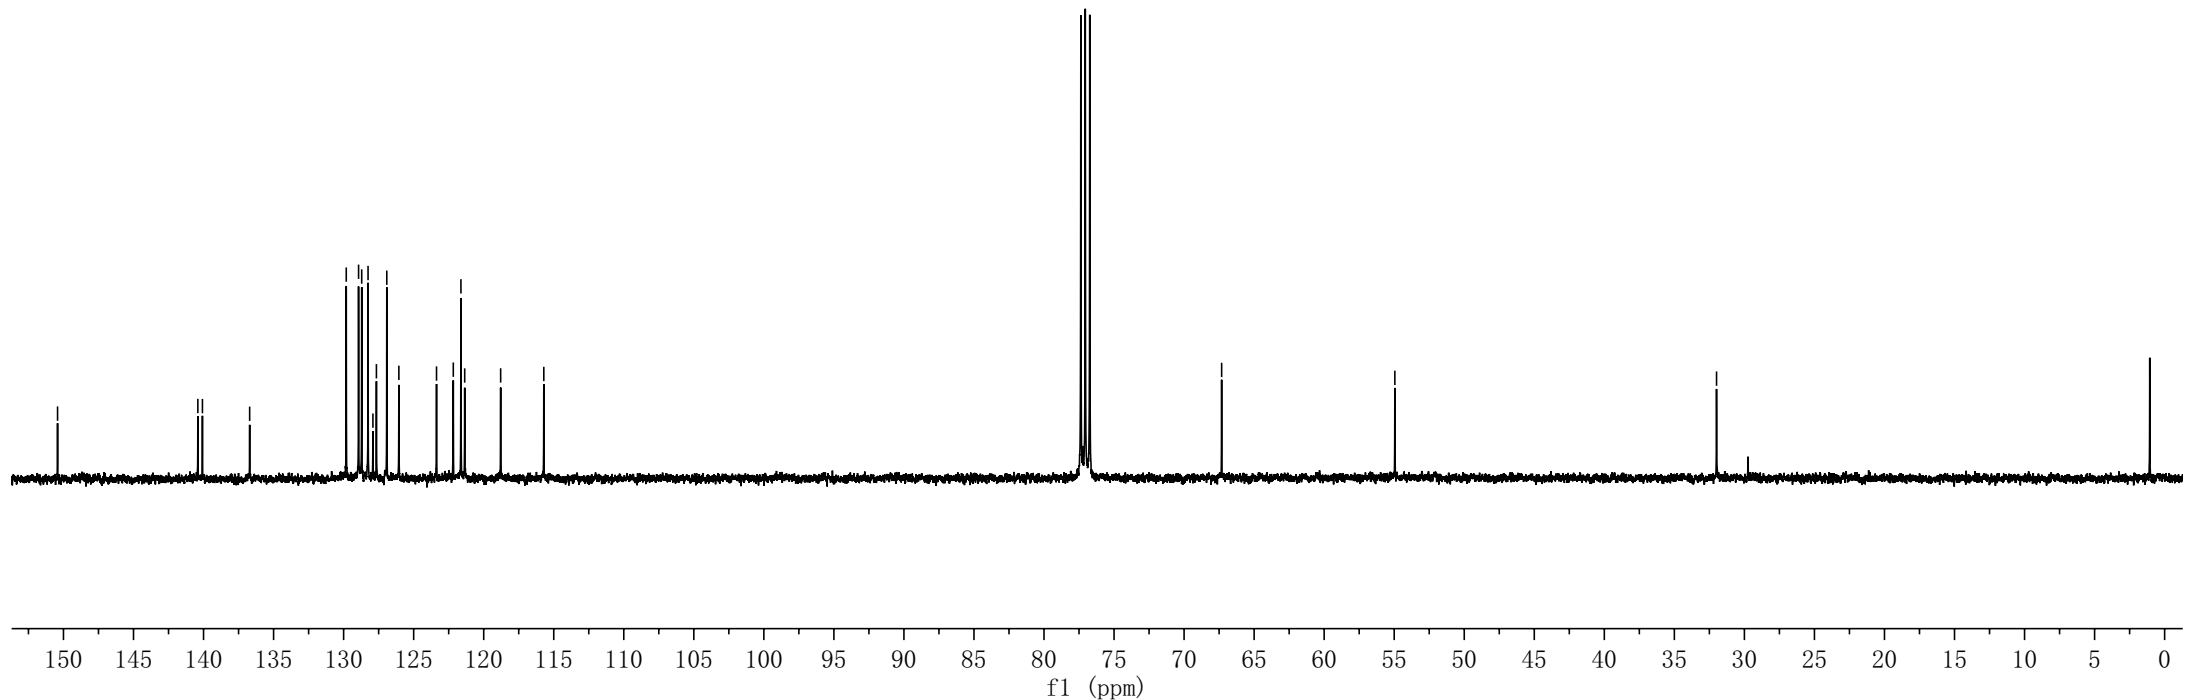

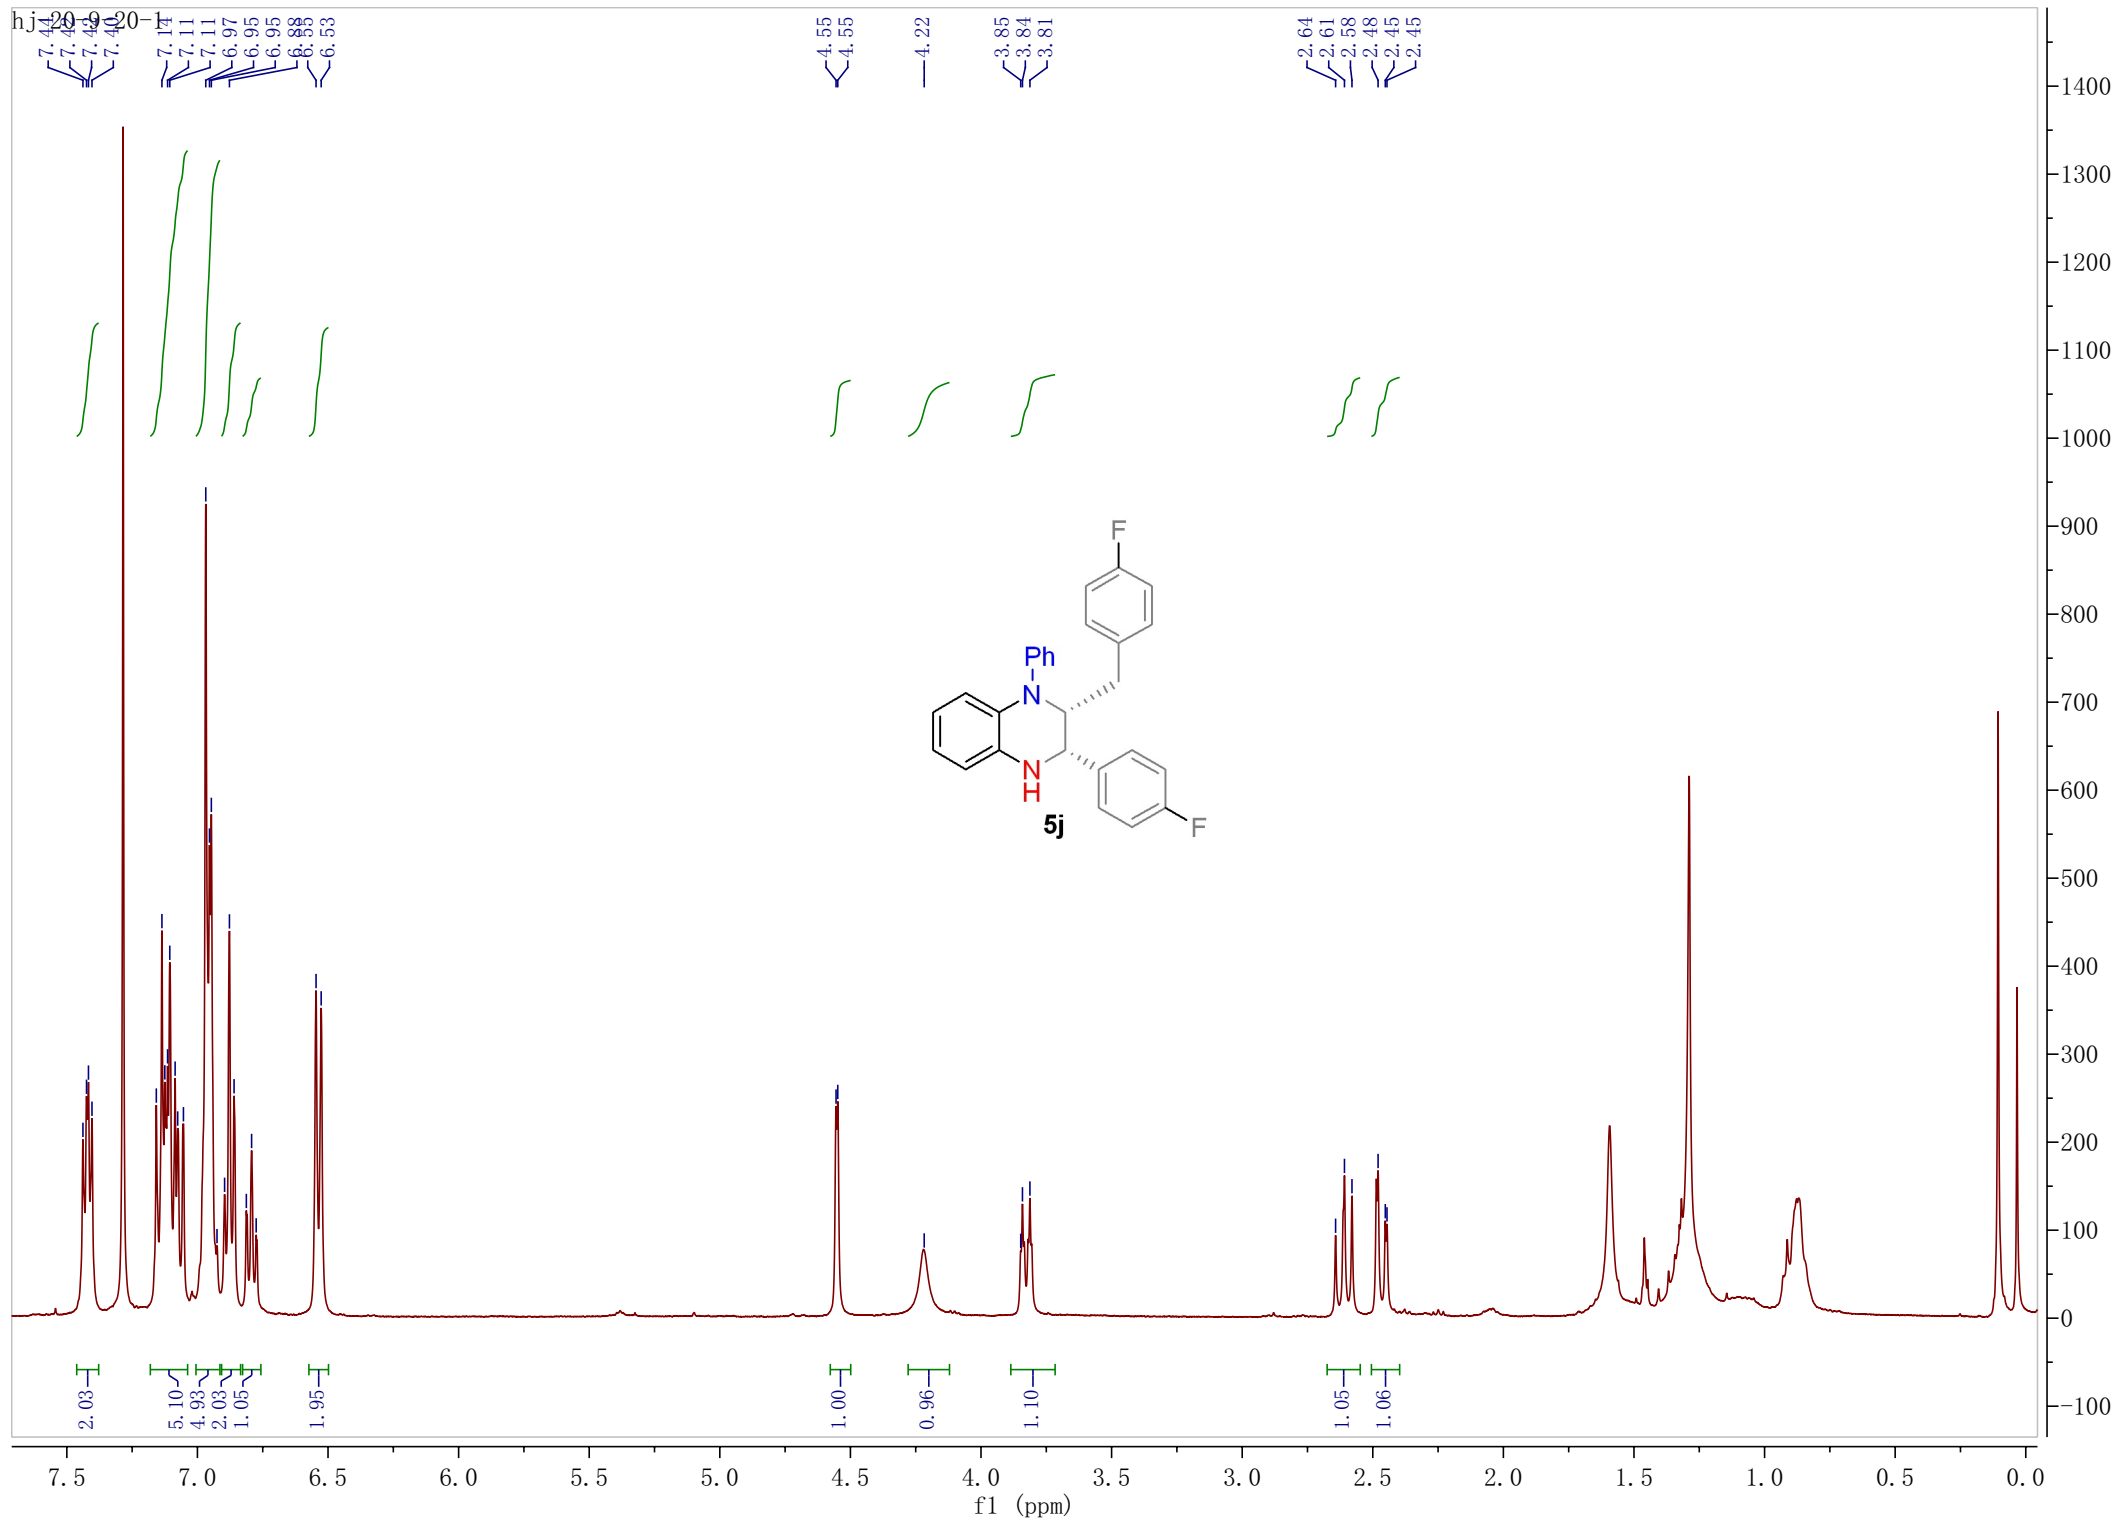

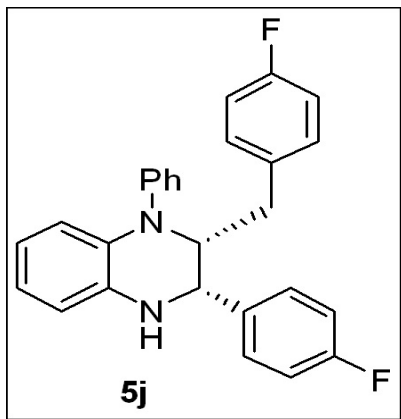

163.46  
162.78  
160.98  
160.36  
150.35  
136.57  
136.06  
136.03  
135.46  
135.43  
131.16  
131.09  
129.03  
128.50  
128.43  
127.79  
123.39  
122.34  
121.57  
119.08  
115.86  
115.73  
115.52  
115.15  
114.94

67.29

54.19

30.98  
29.72

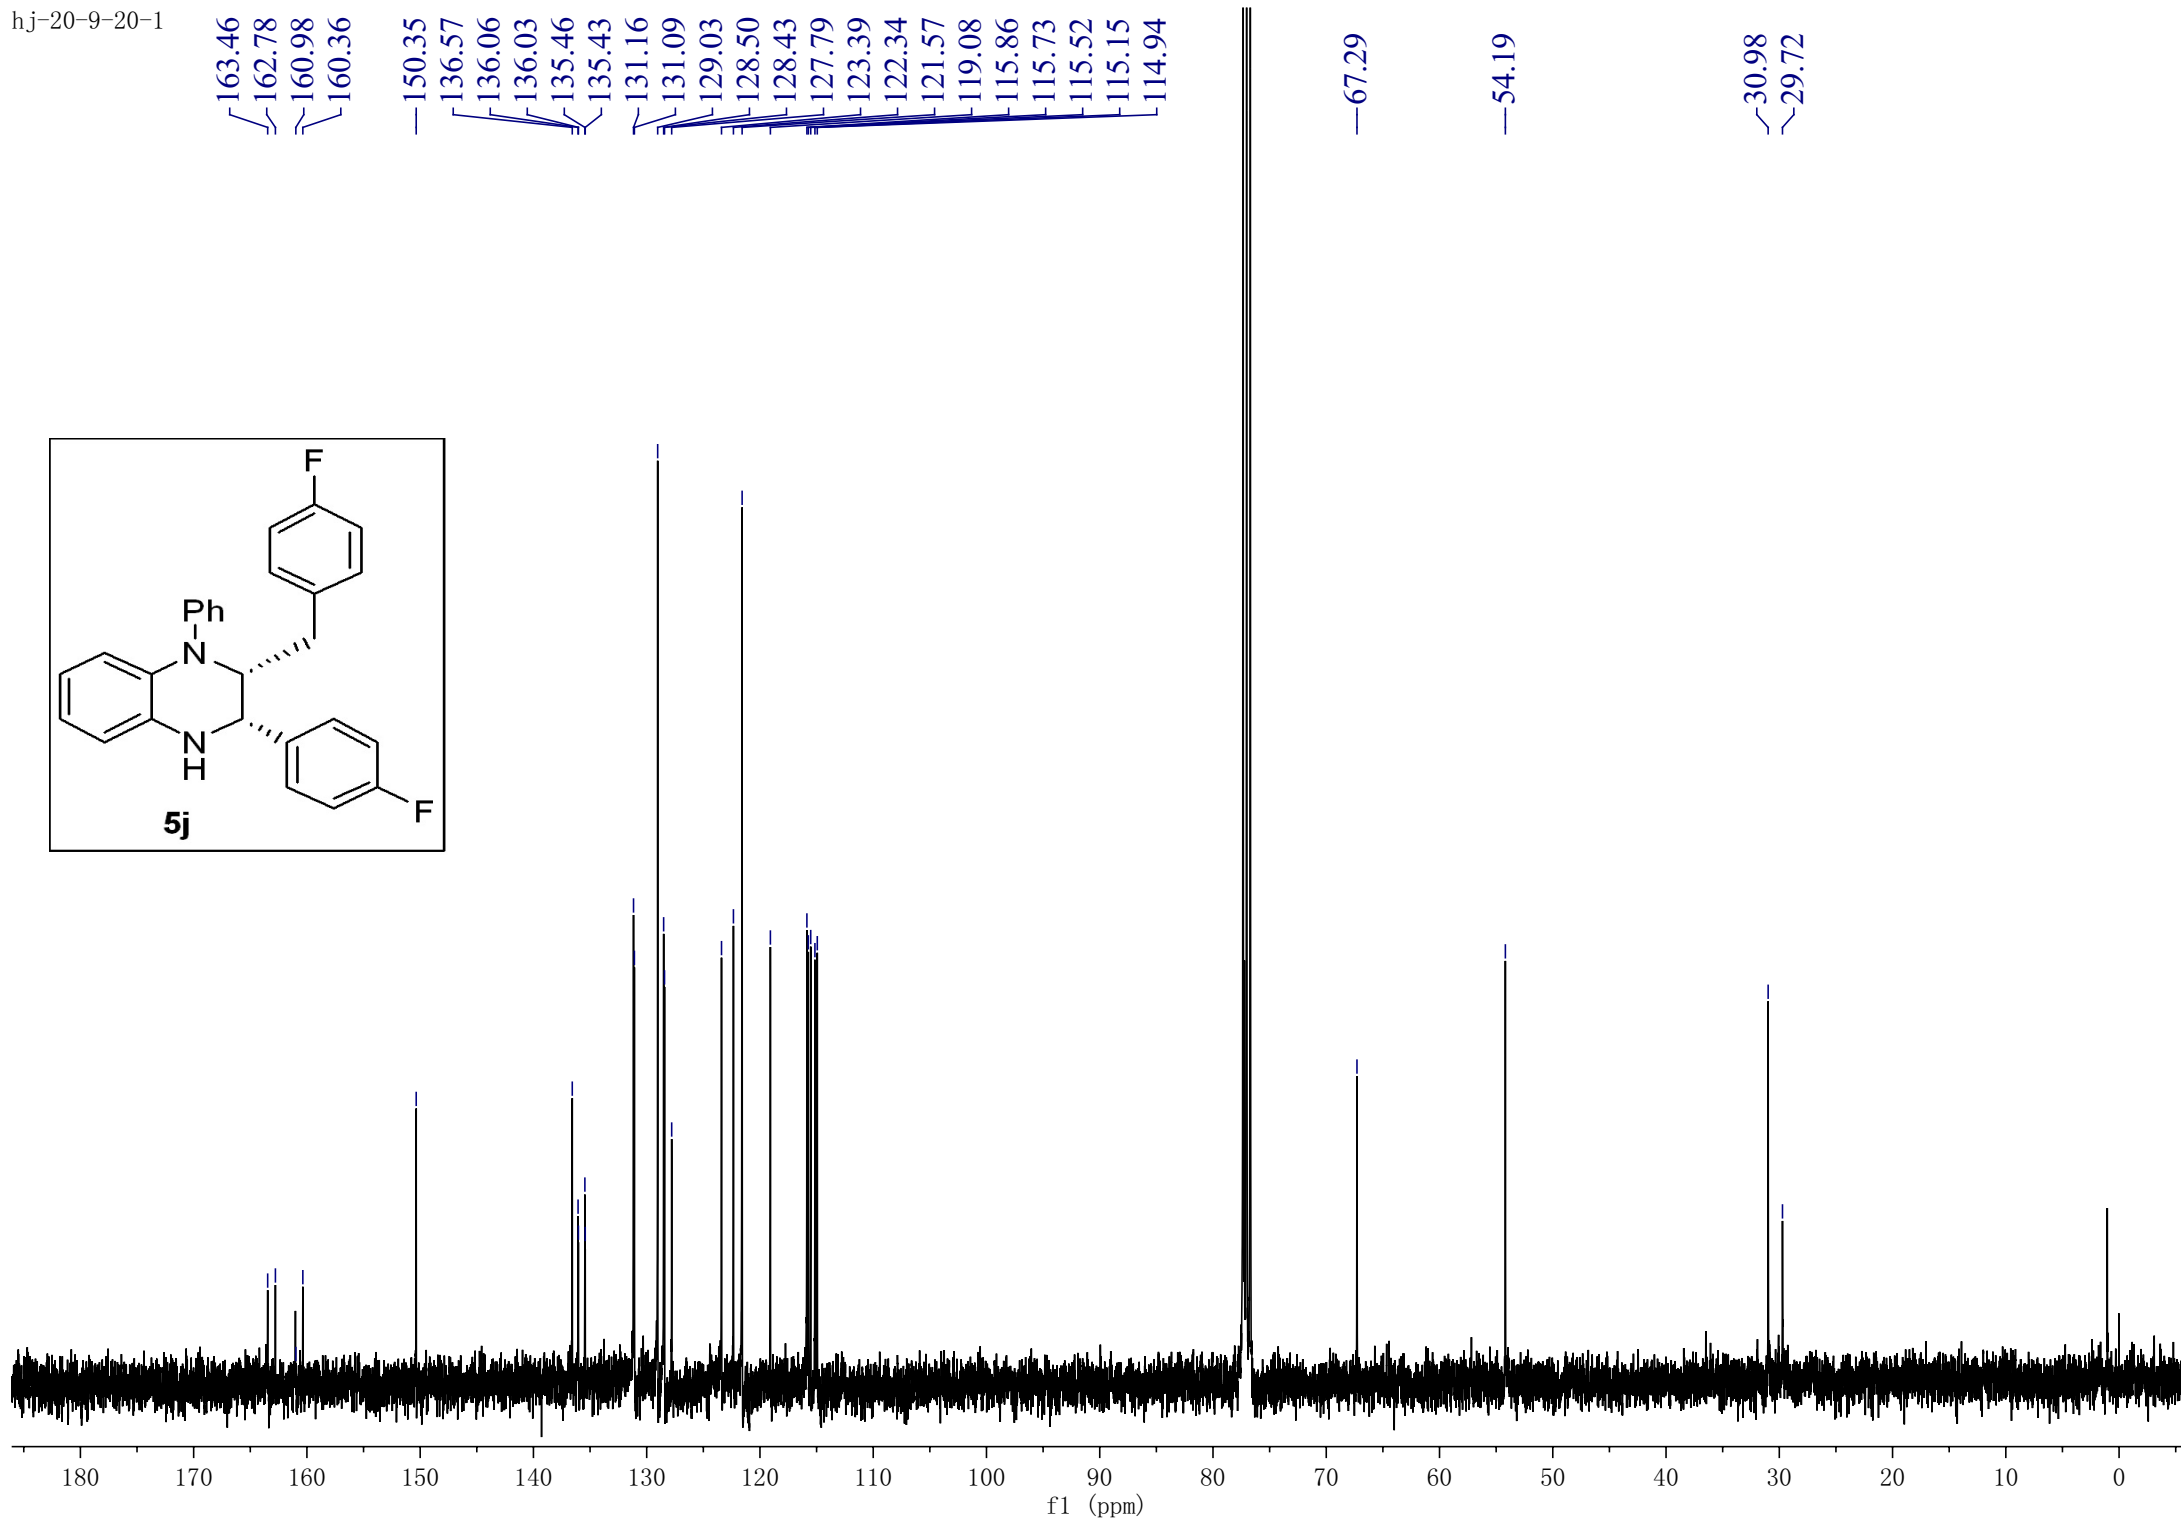

hj-20-9-20-1F

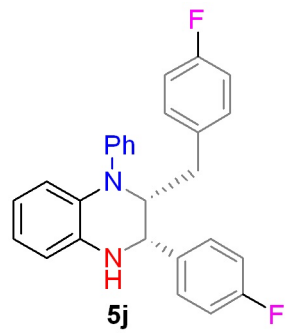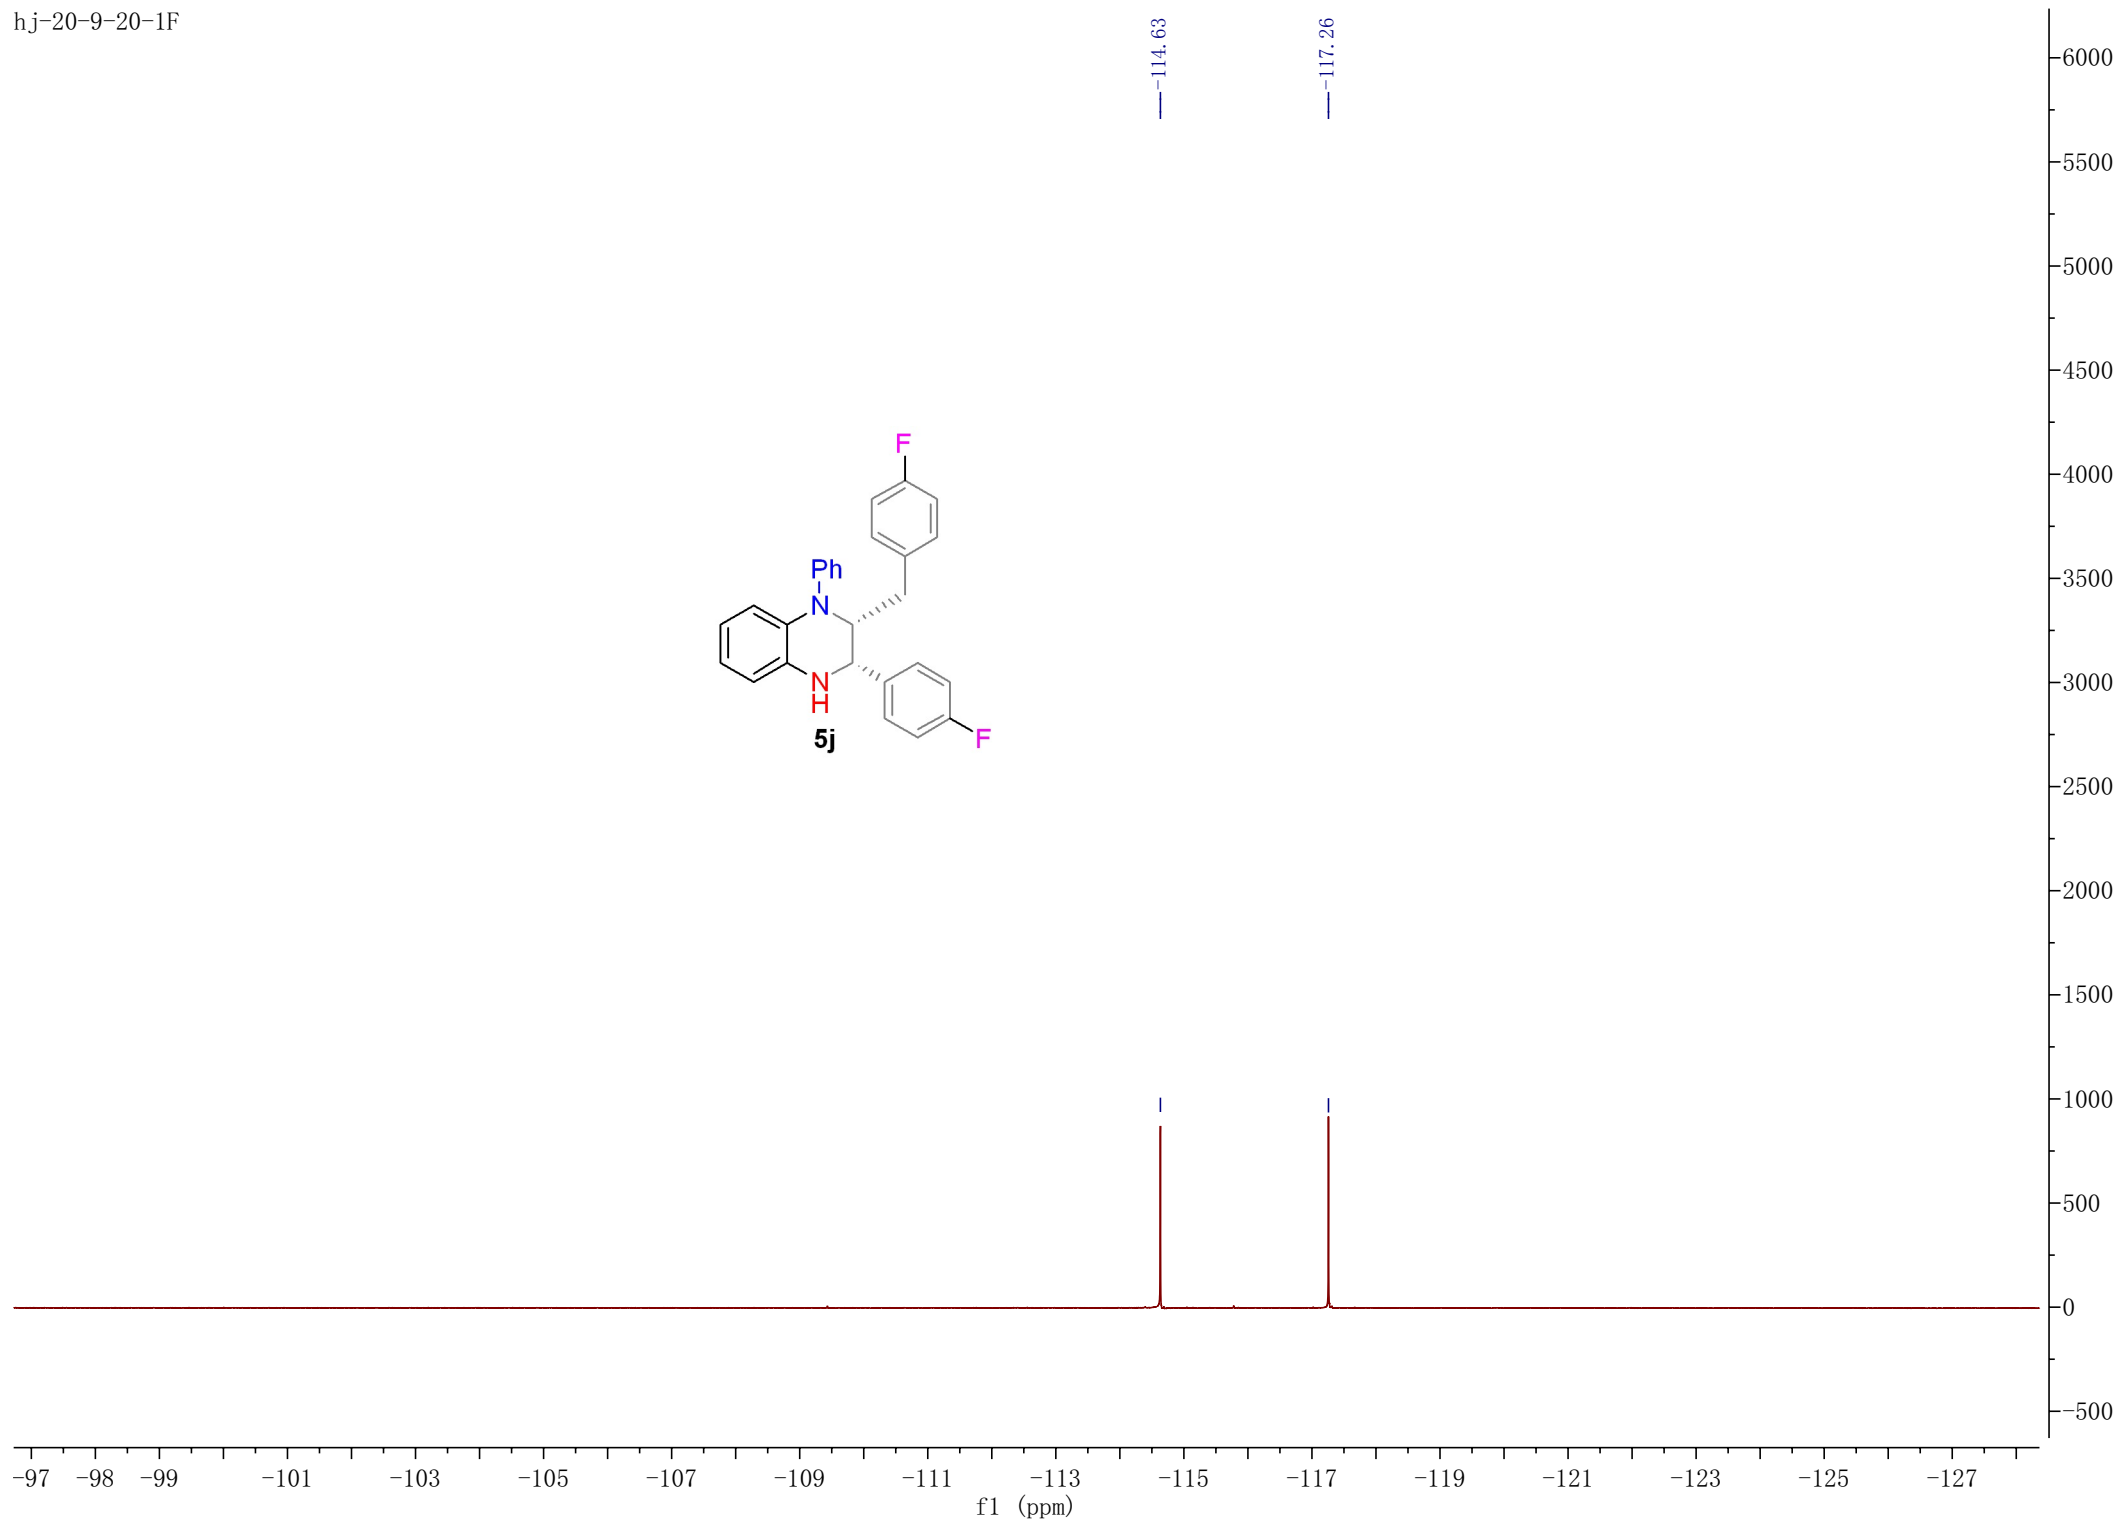

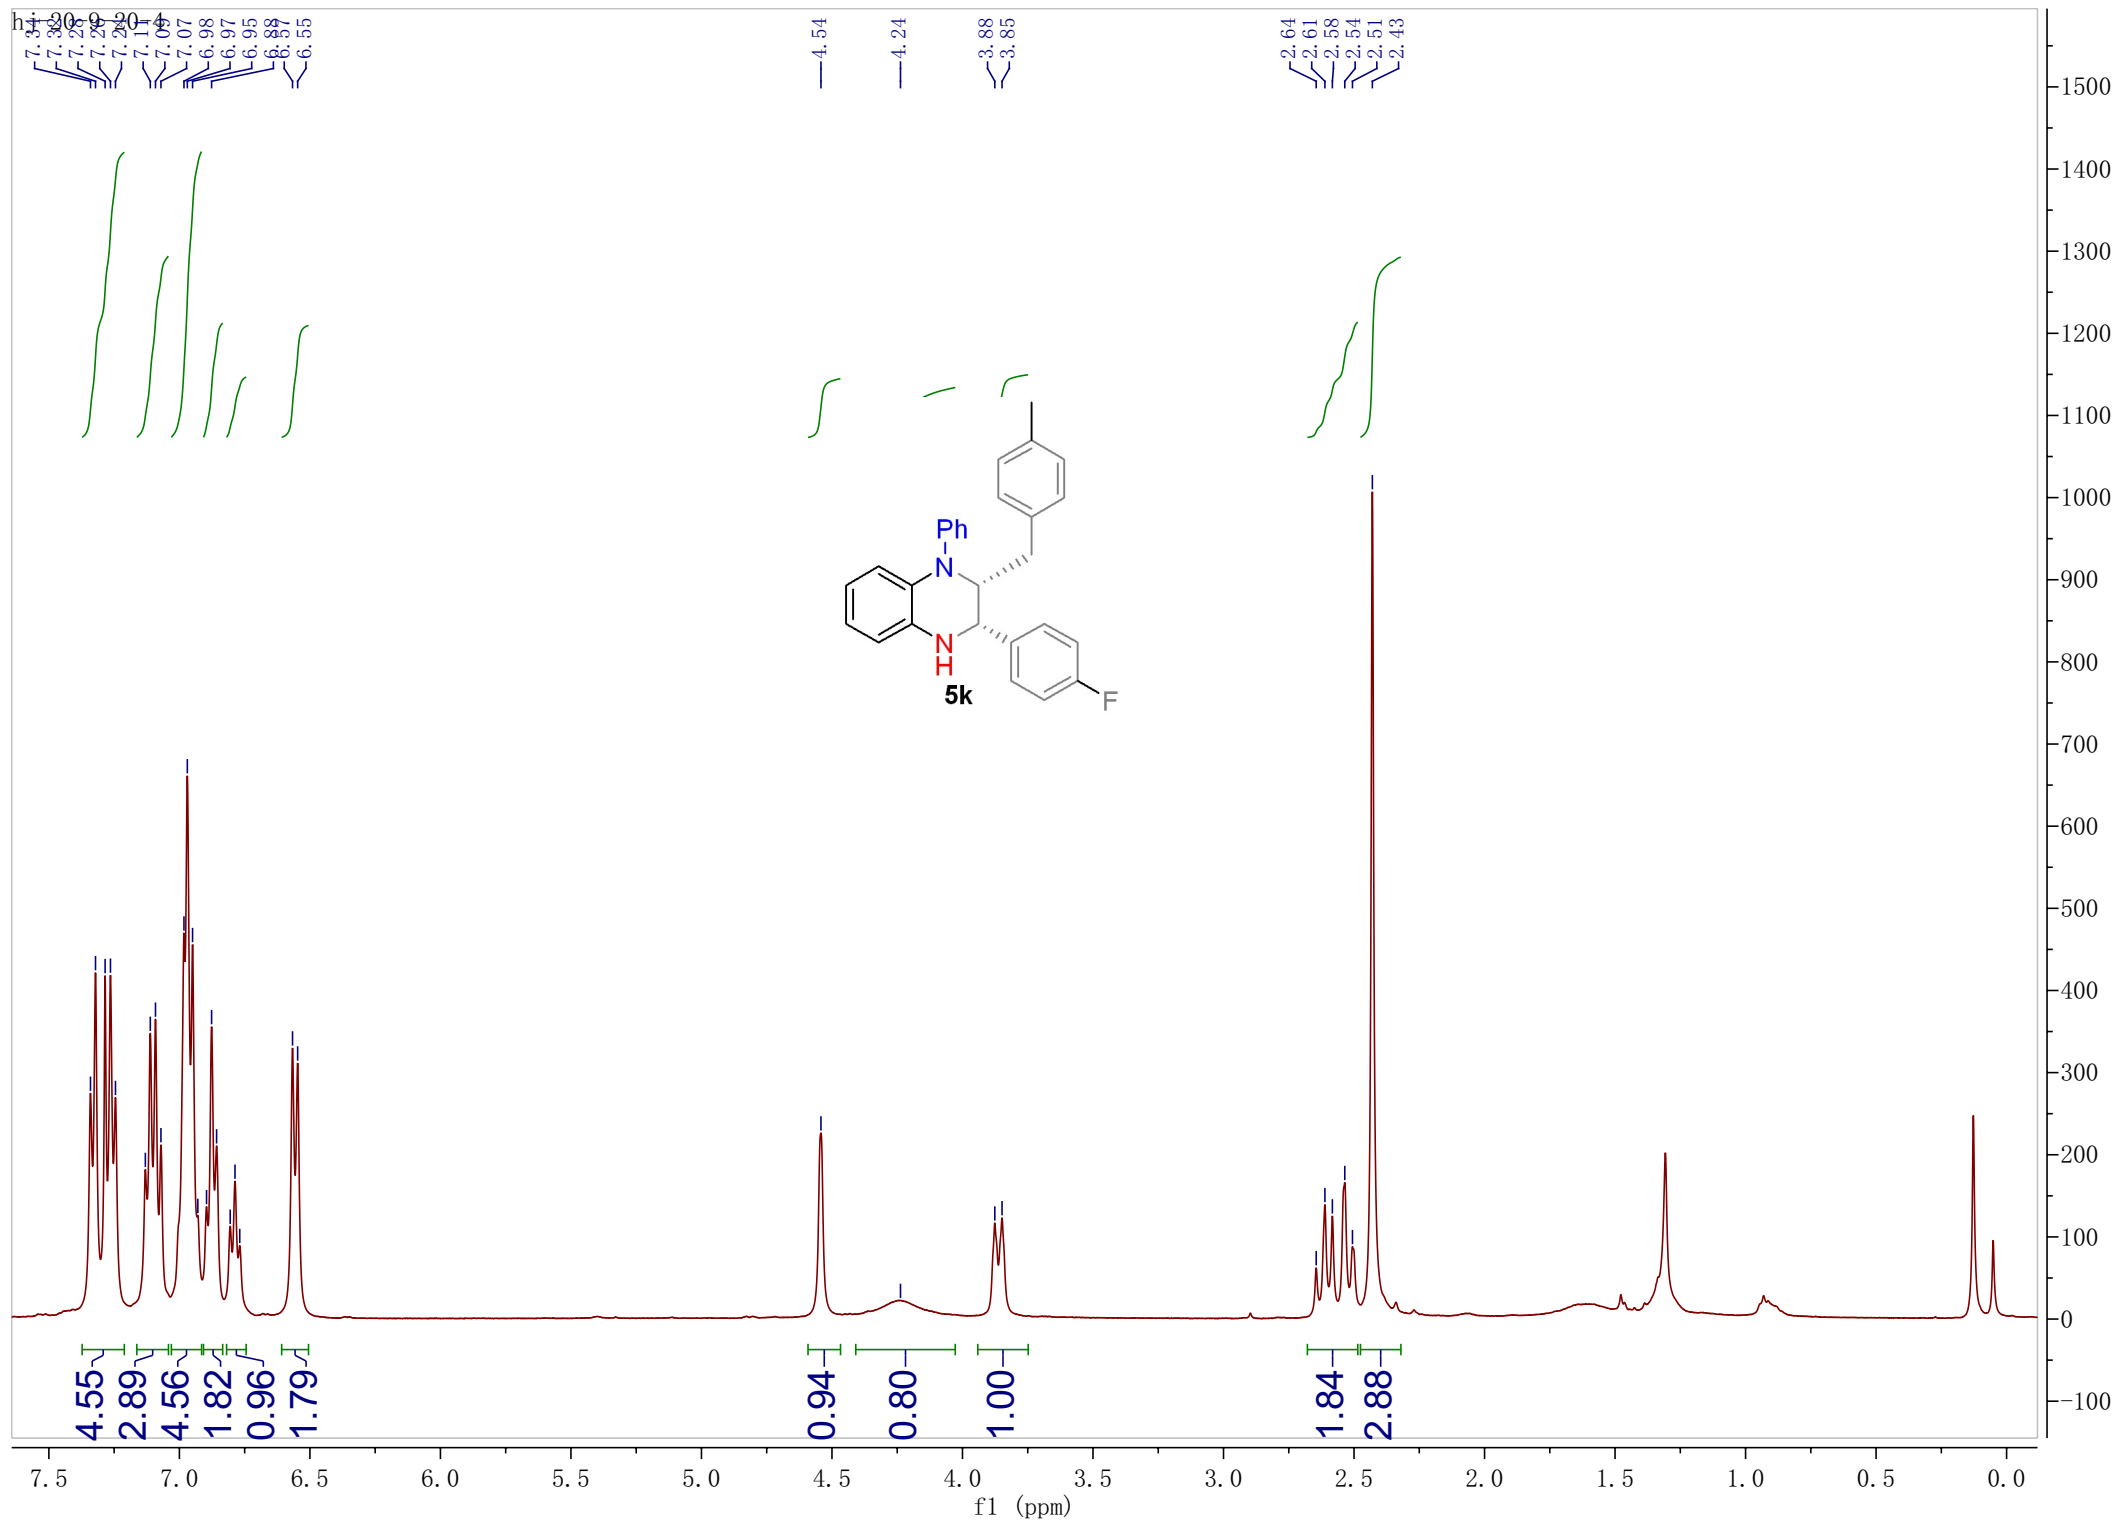



162.76  
160.34  
150.46  
137.37  
137.27  
136.83  
135.78  
135.75  
131.22  
131.15  
129.41  
129.01  
127.71  
126.77  
123.39  
122.29  
121.54  
121.44  
118.75  
115.71  
115.09  
114.88  
67.28  
54.60  
31.11  
21.15

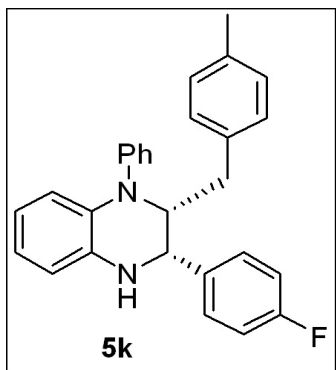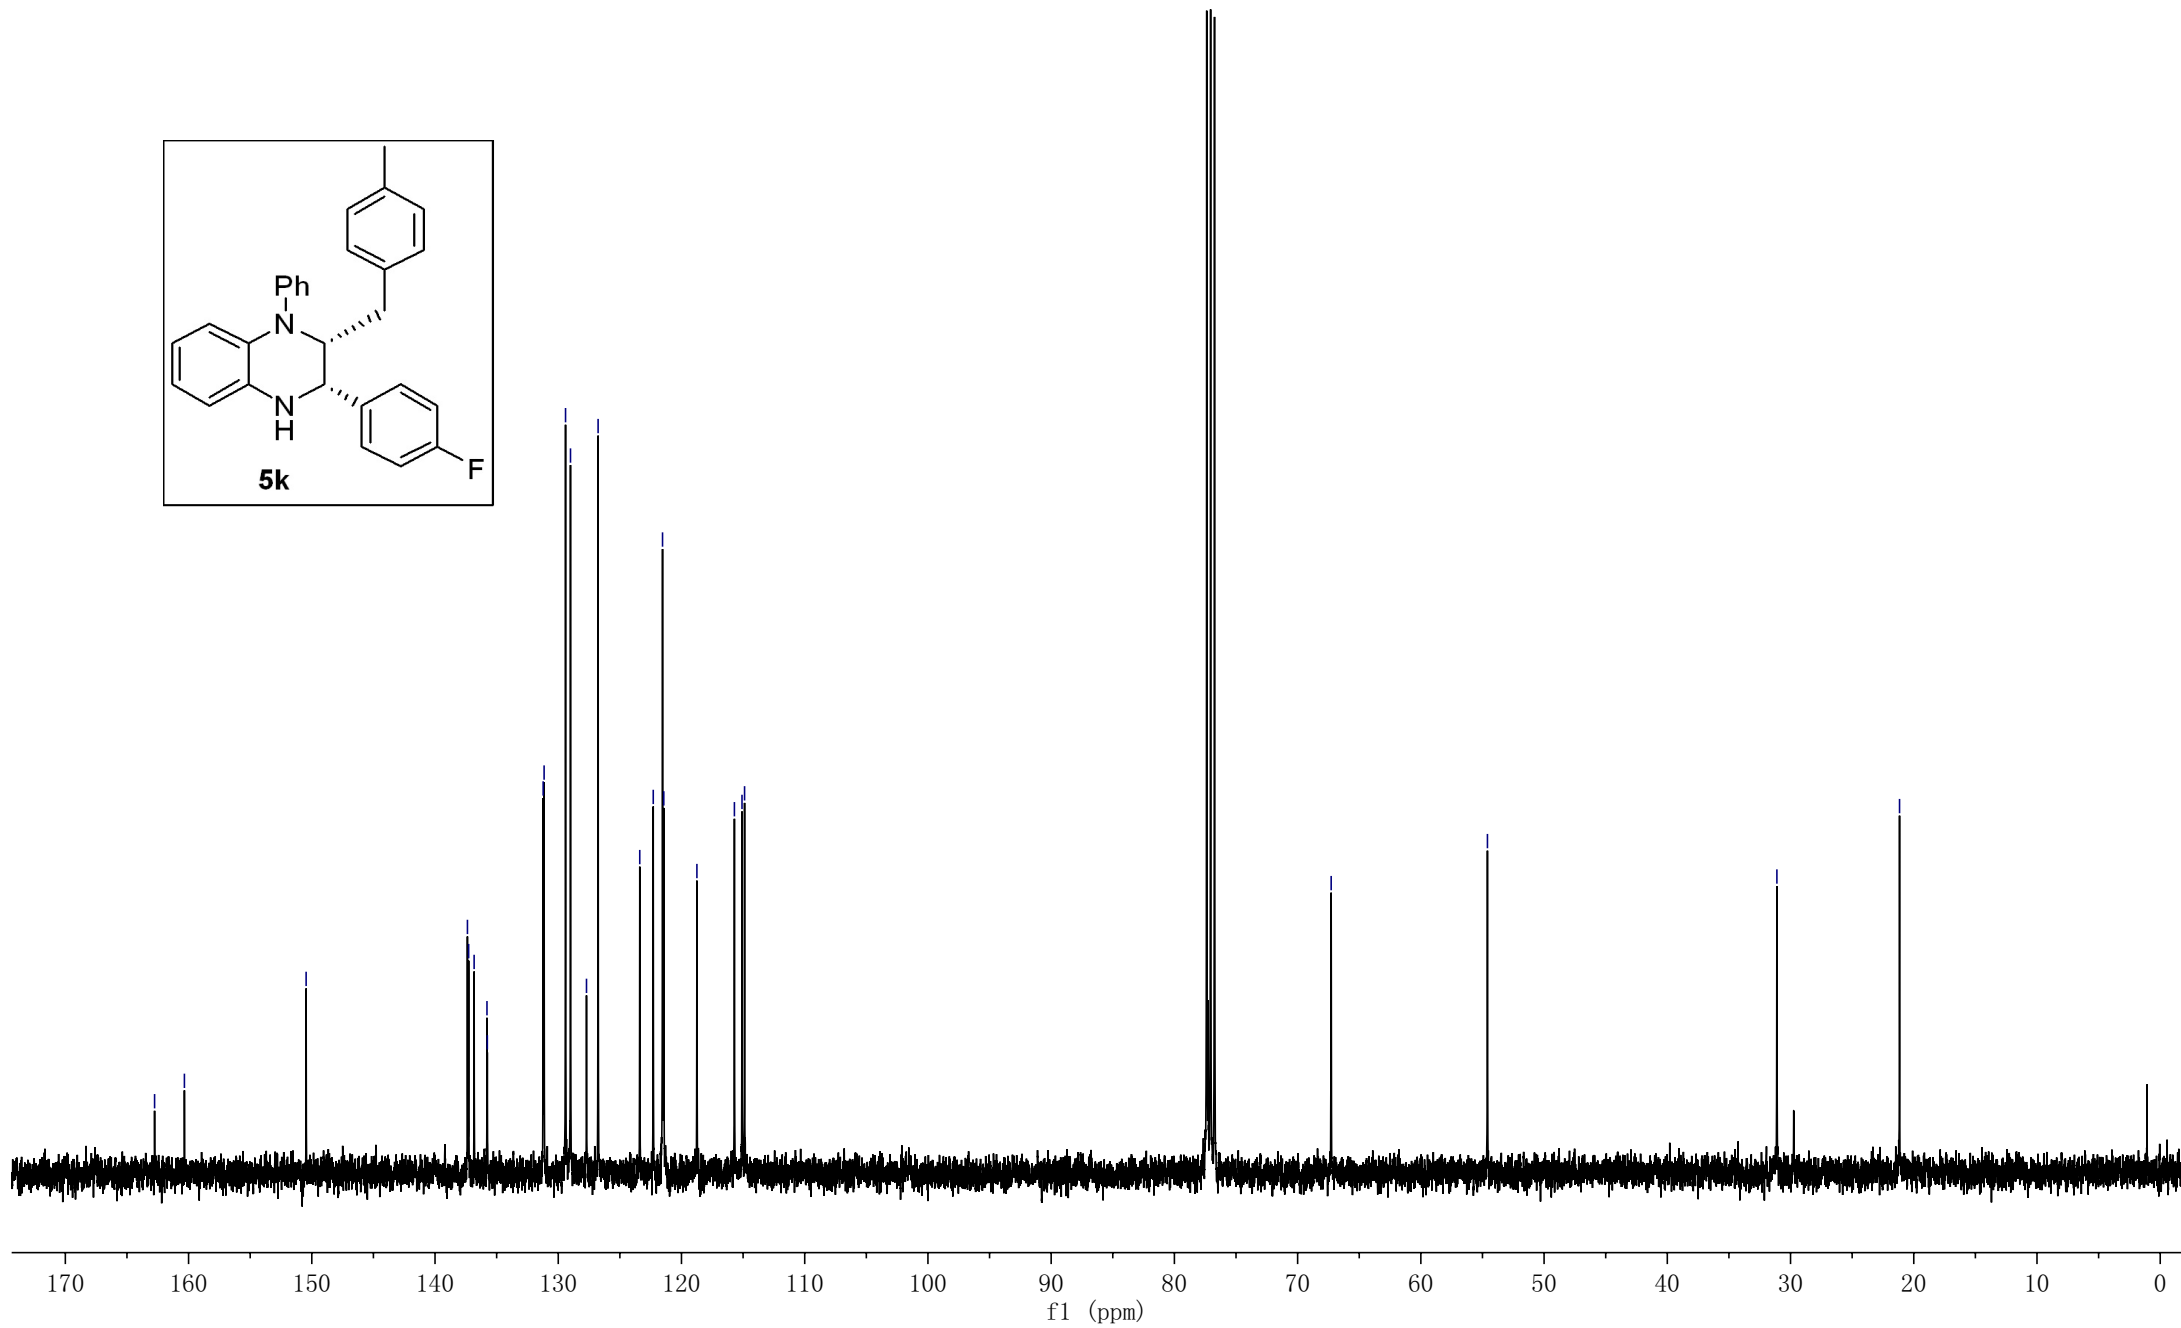

hj-20-9-20-4

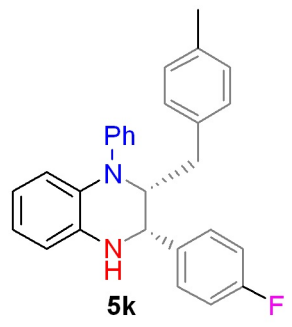

117.42  
117.43  
117.44  
117.46

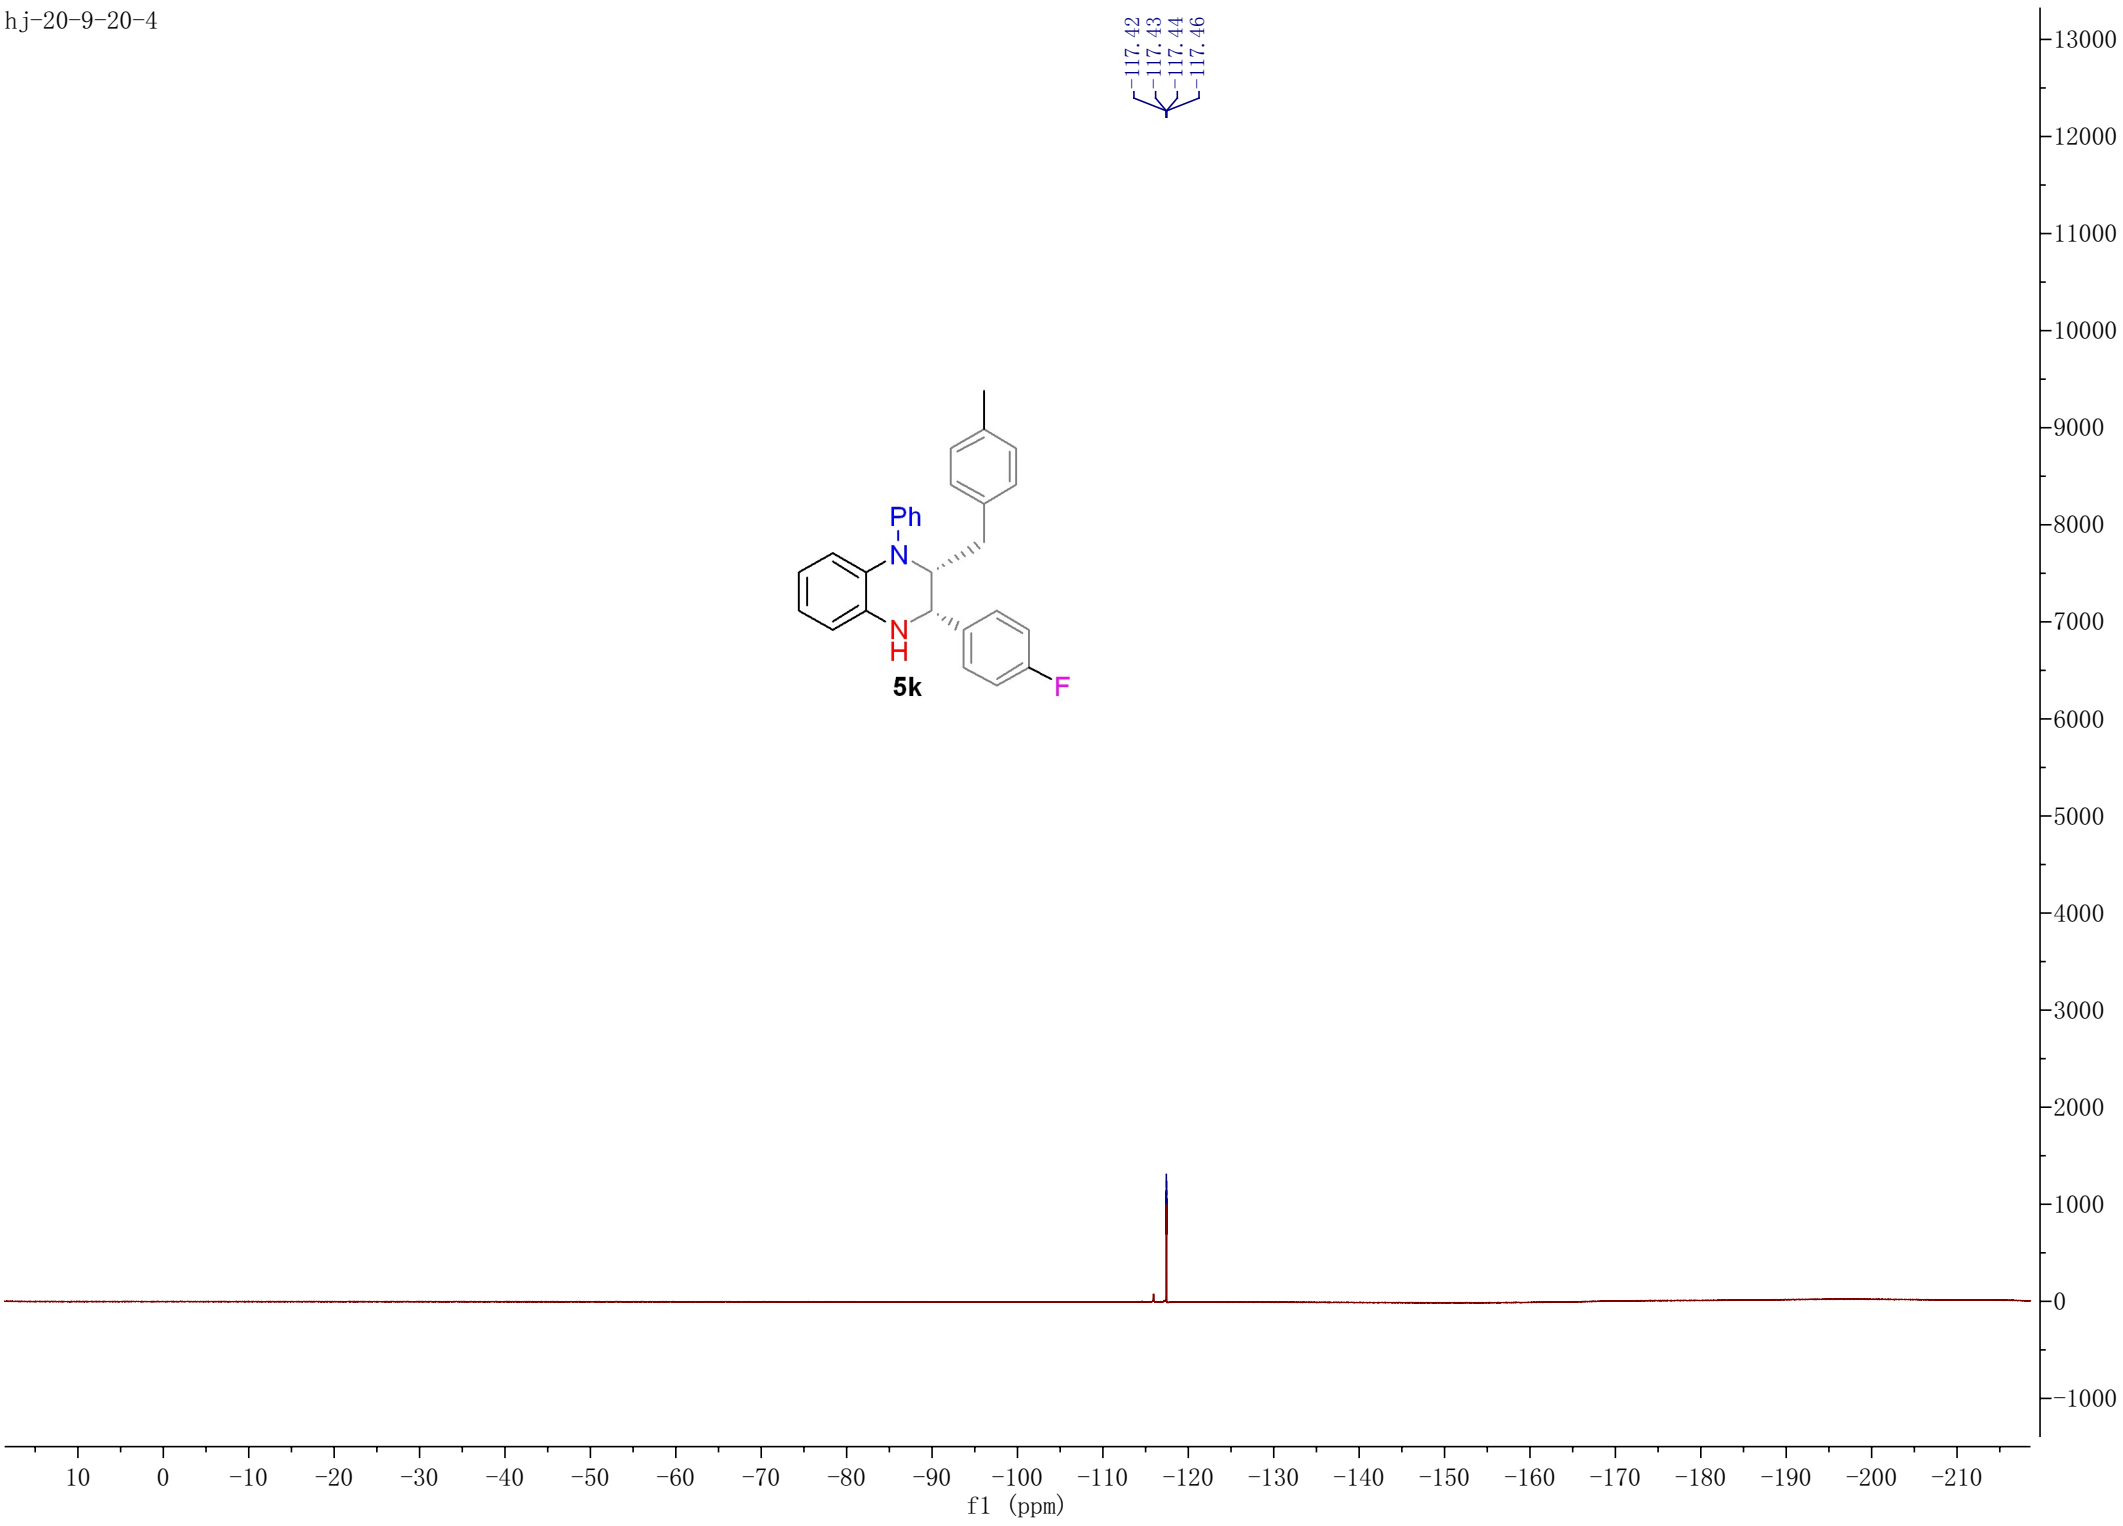

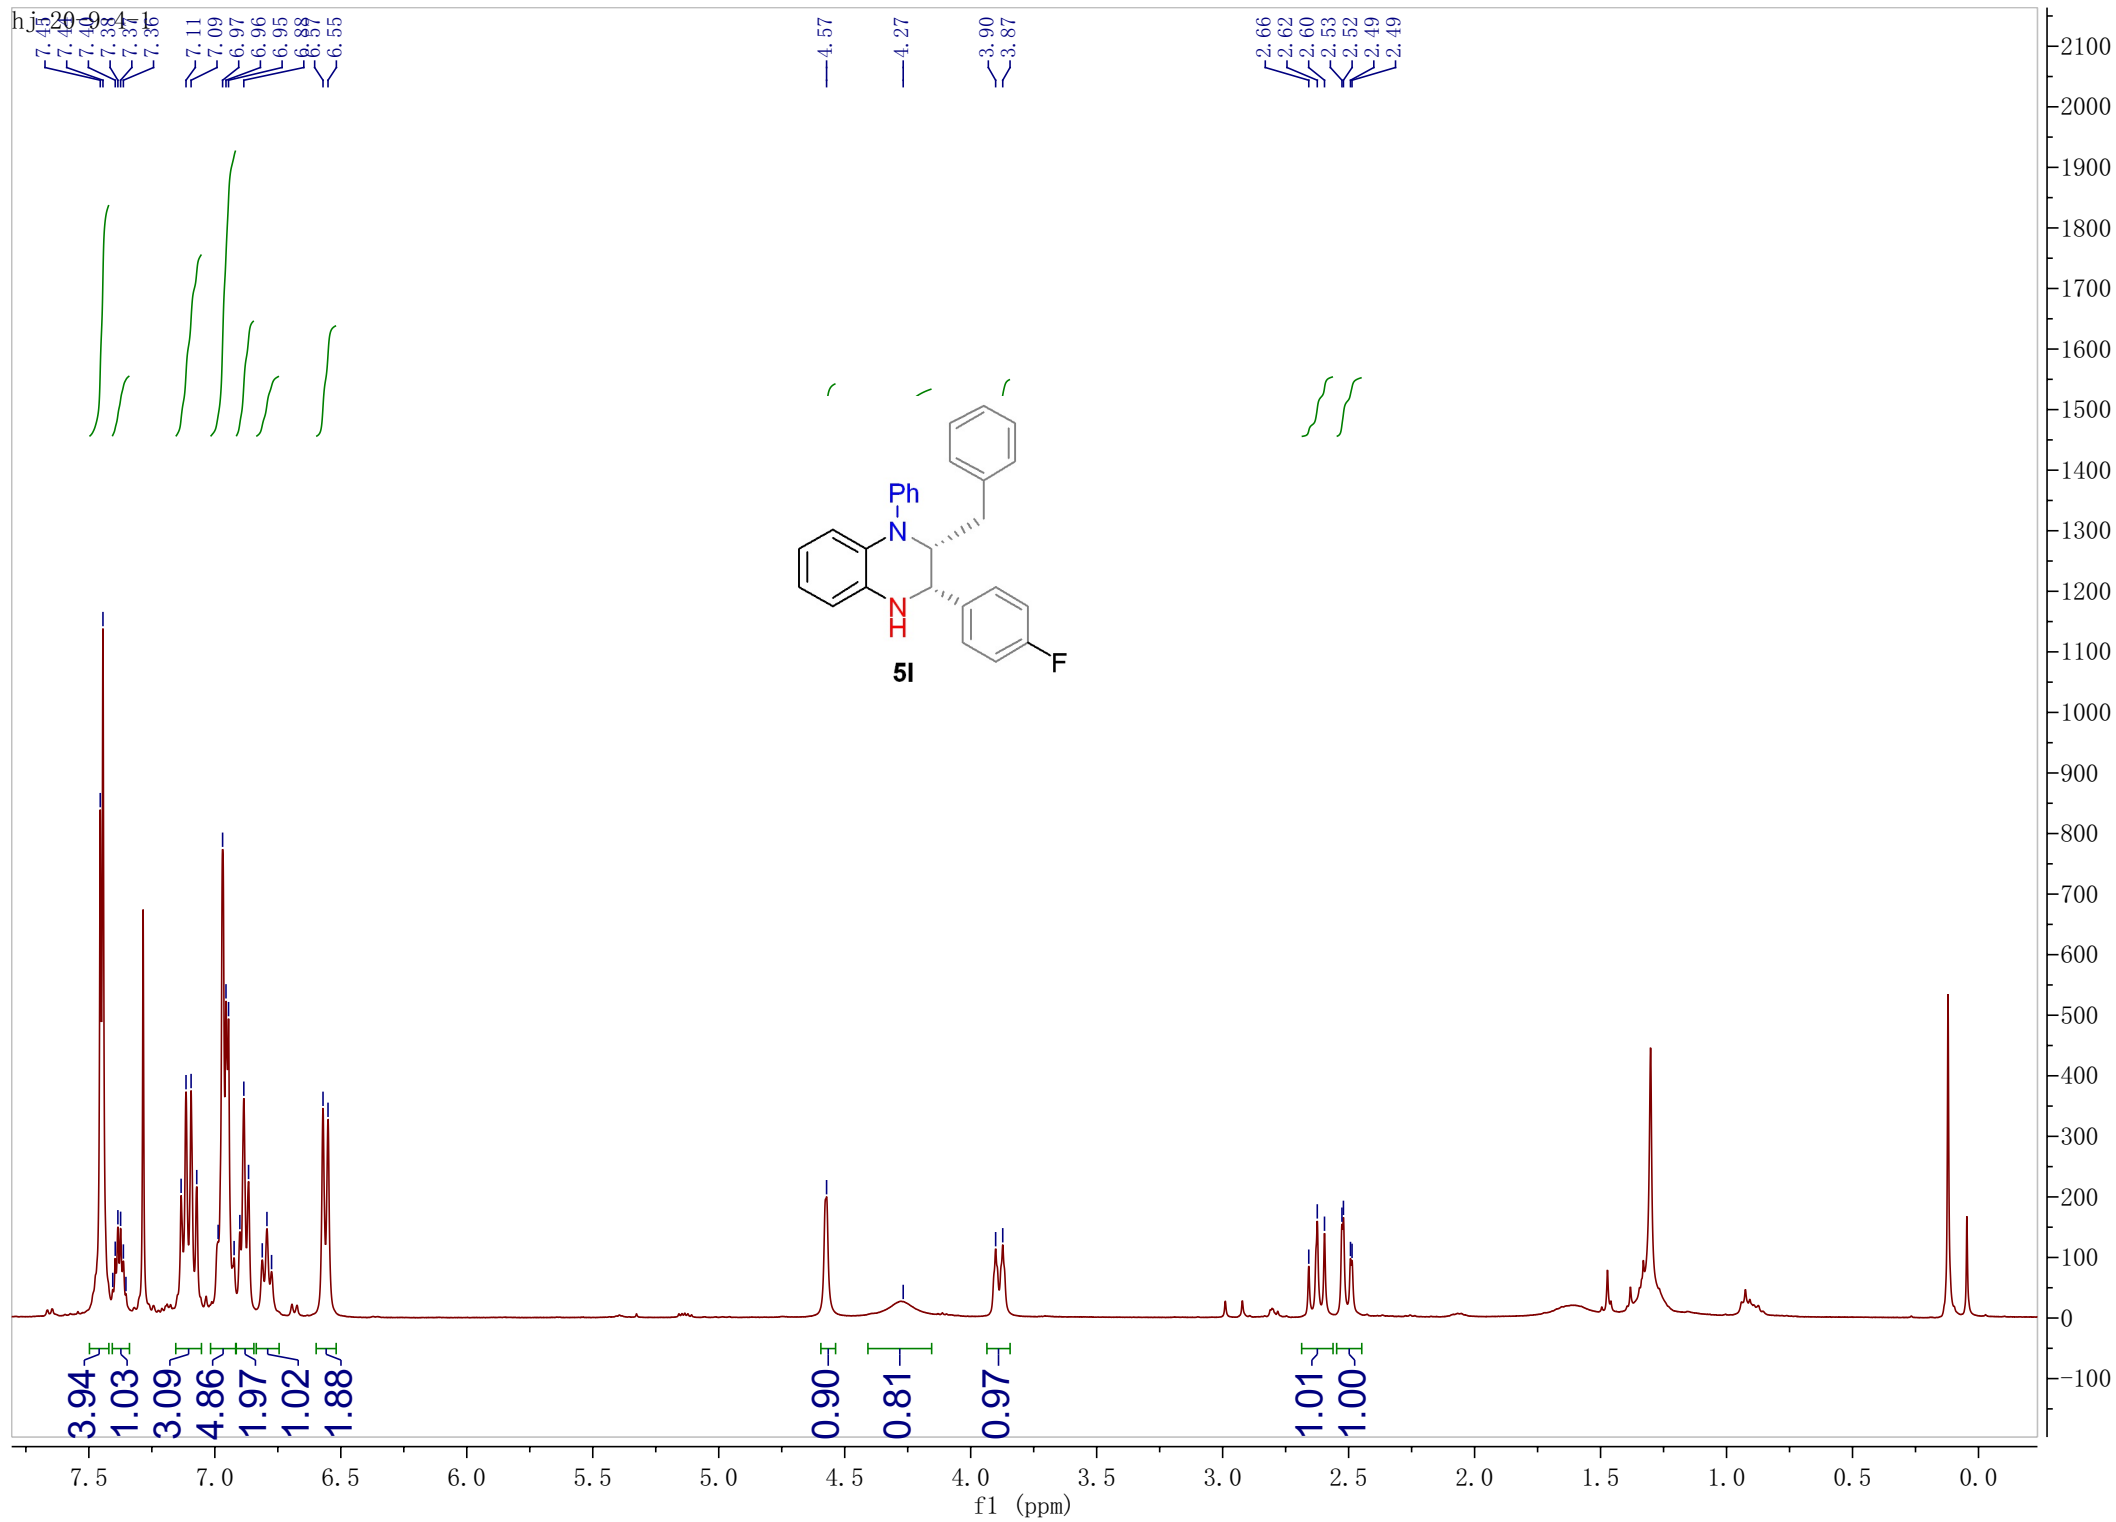

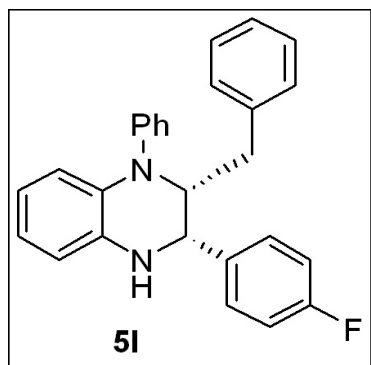

—162.75

—160.33

—150.42

—140.28

—136.73

—135.64

131.19

131.11

129.01

128.72

127.72

127.70

126.88

123.40

122.32

121.55

121.49

—118.84

115.76

115.10

114.89

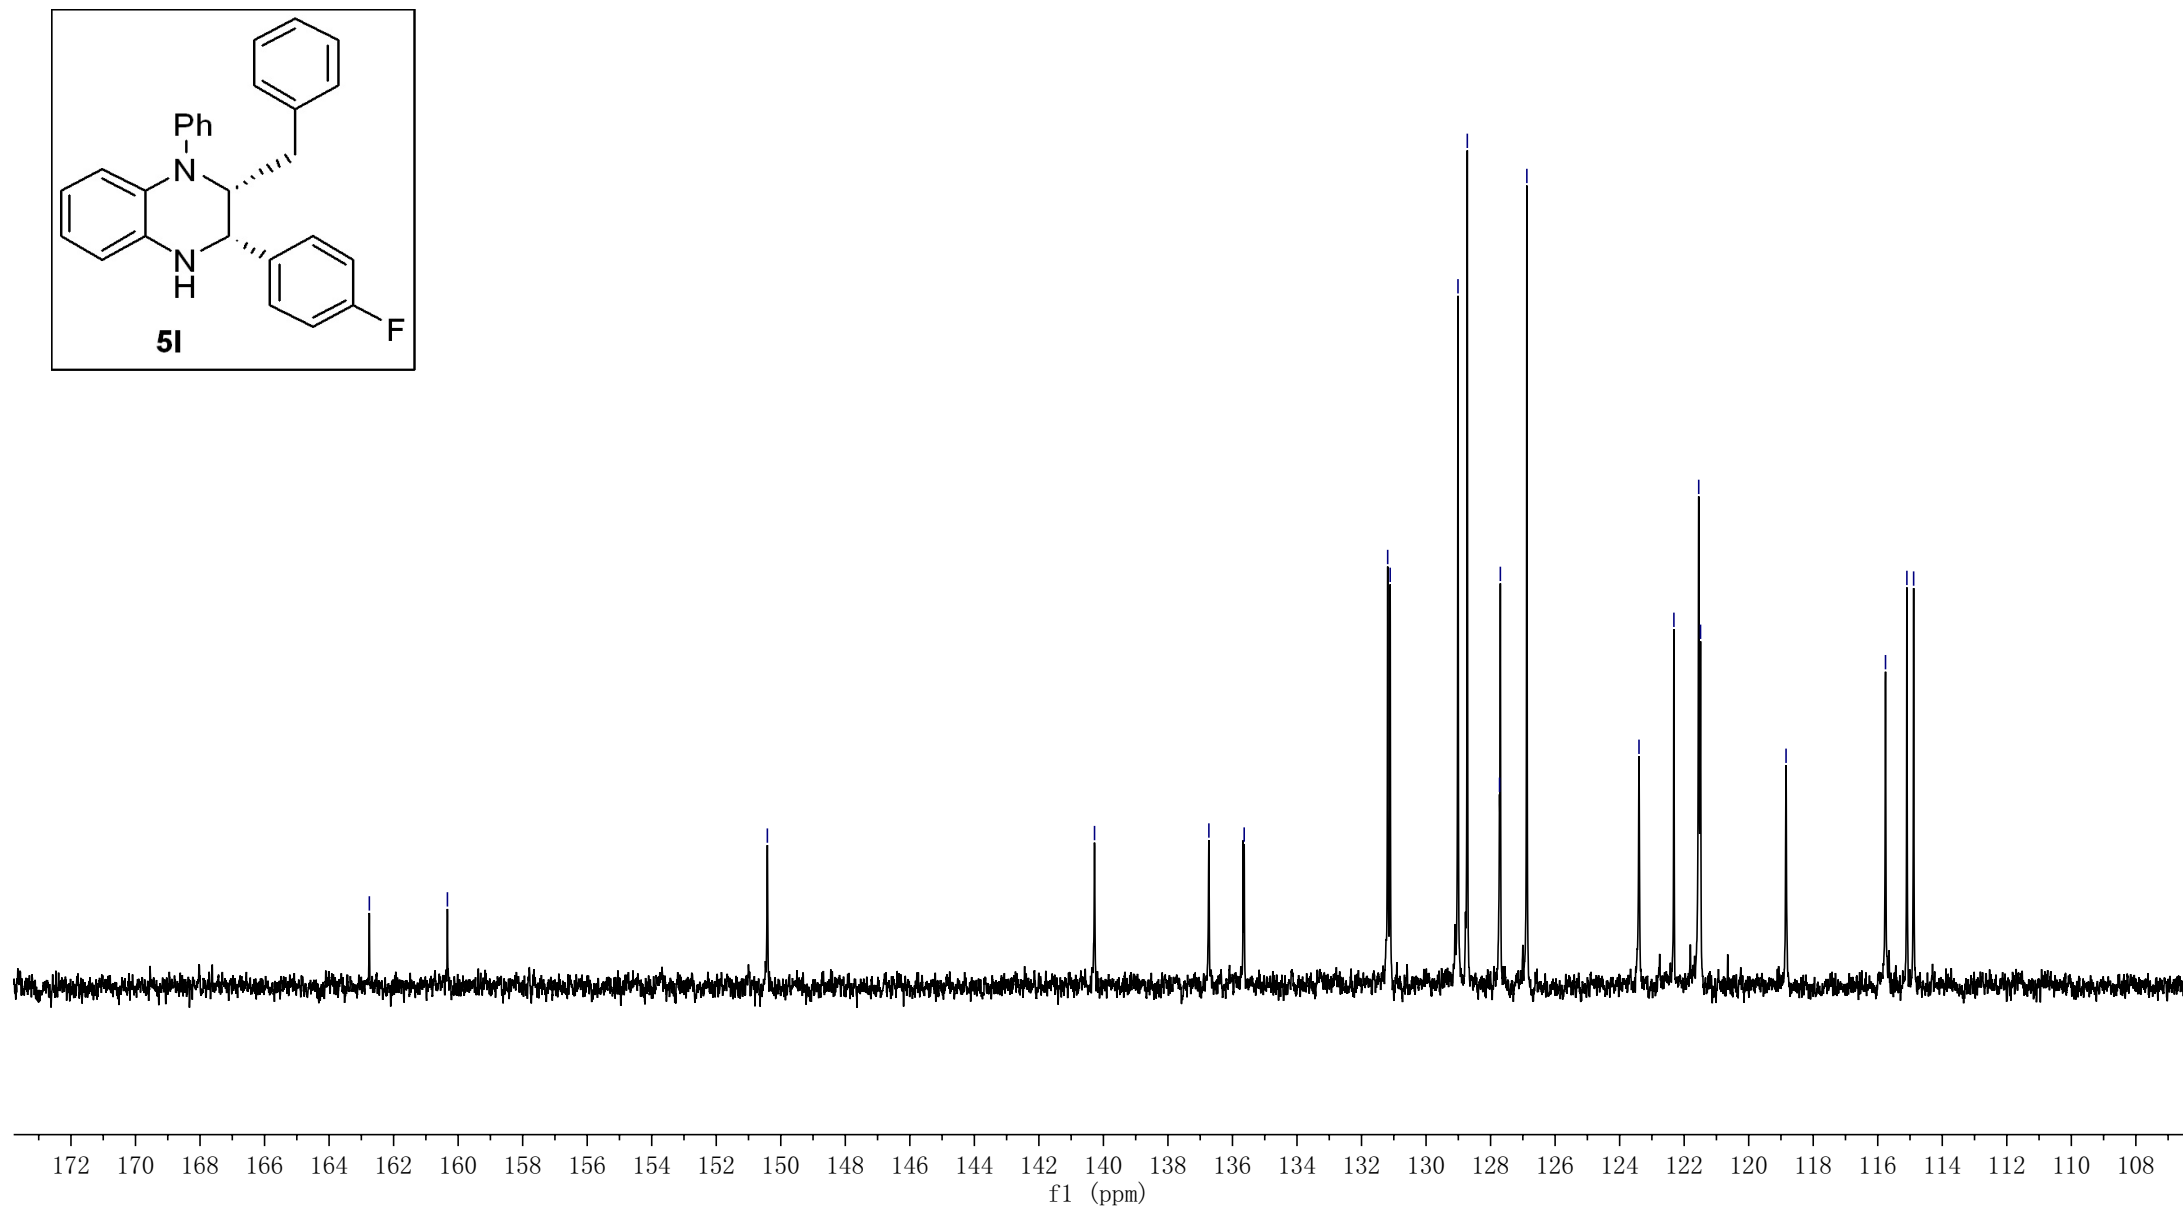

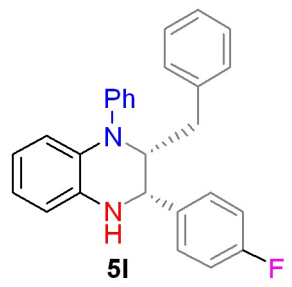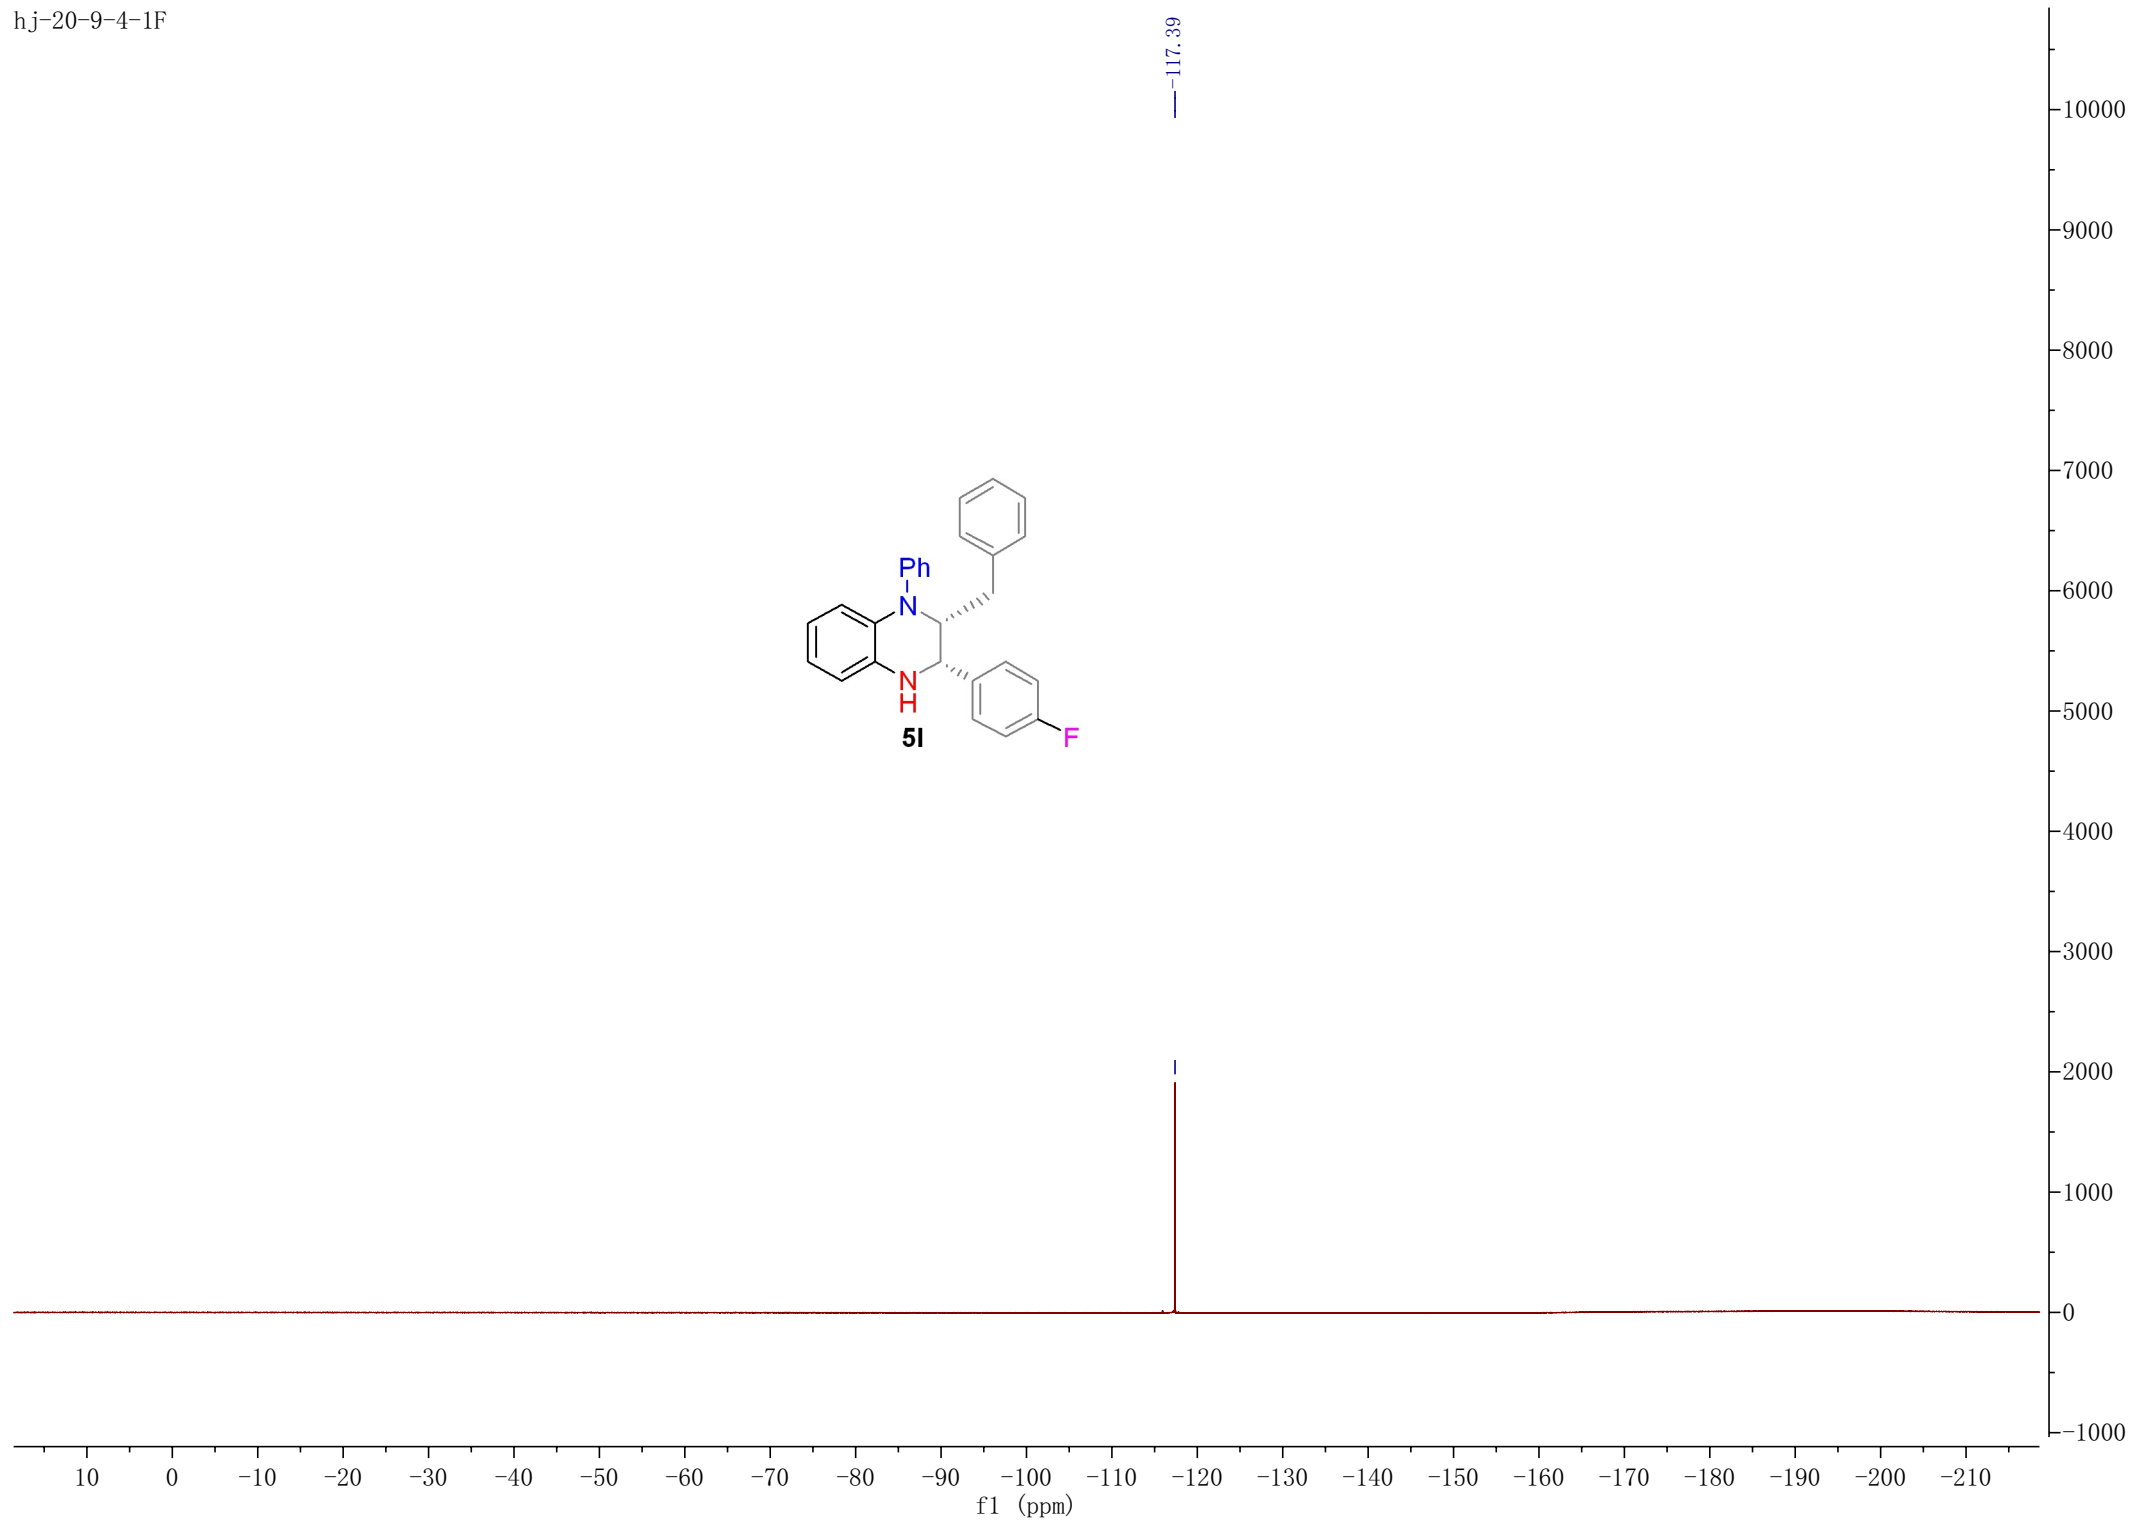

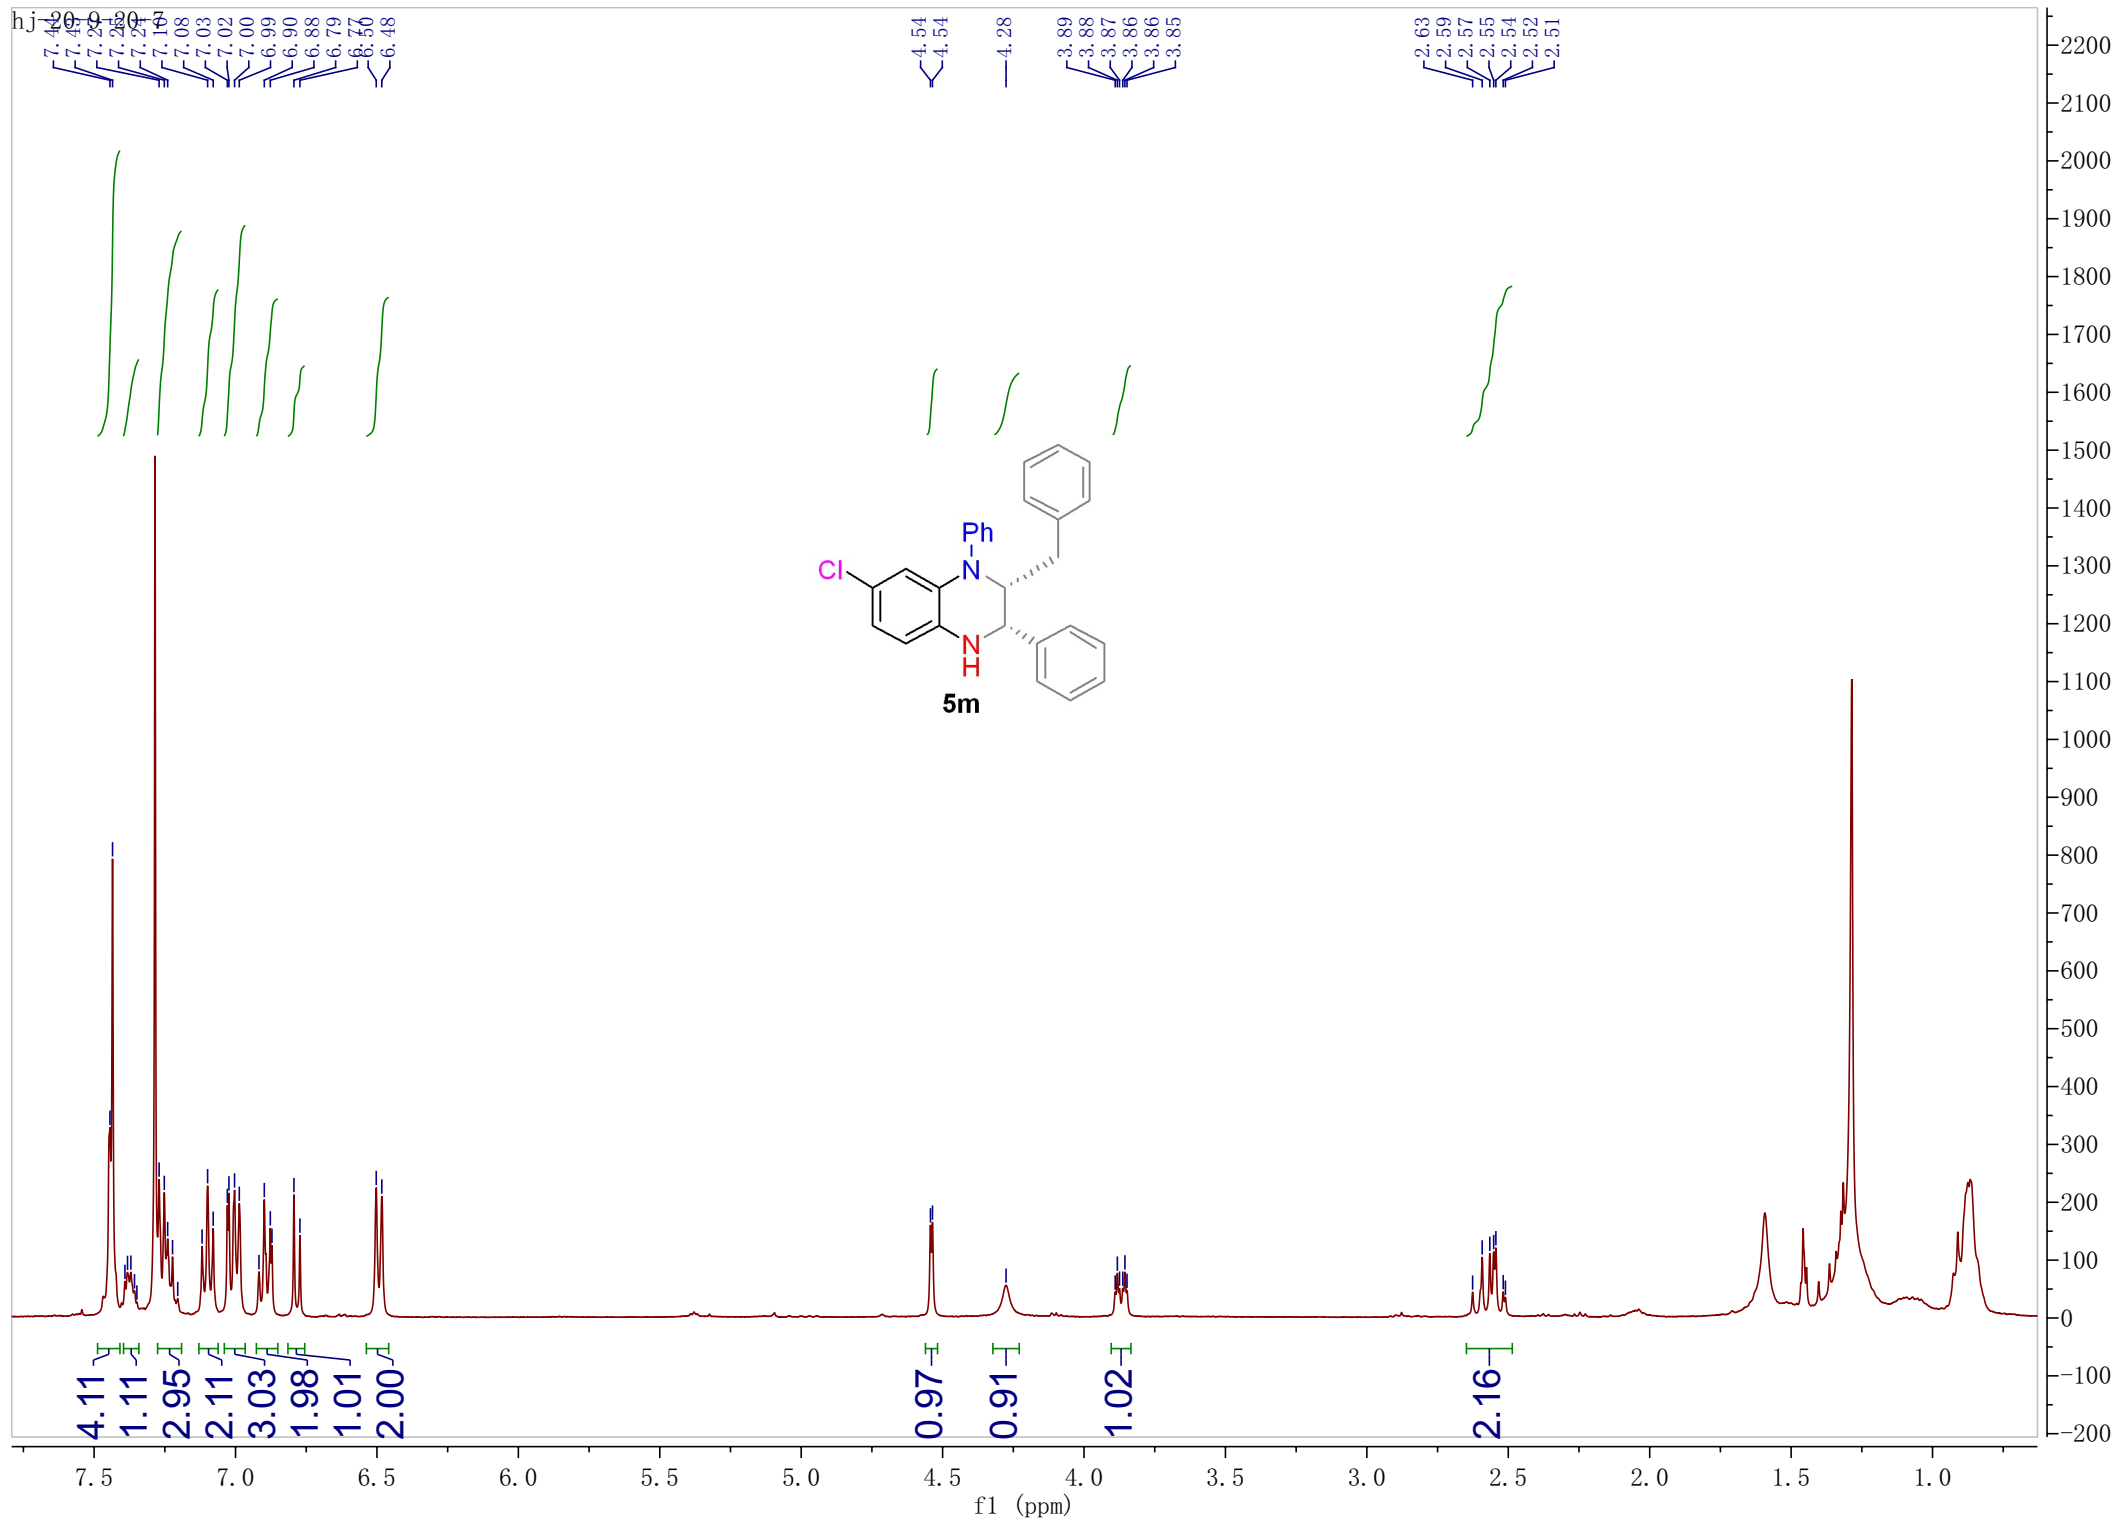

hj-20-9-20-7

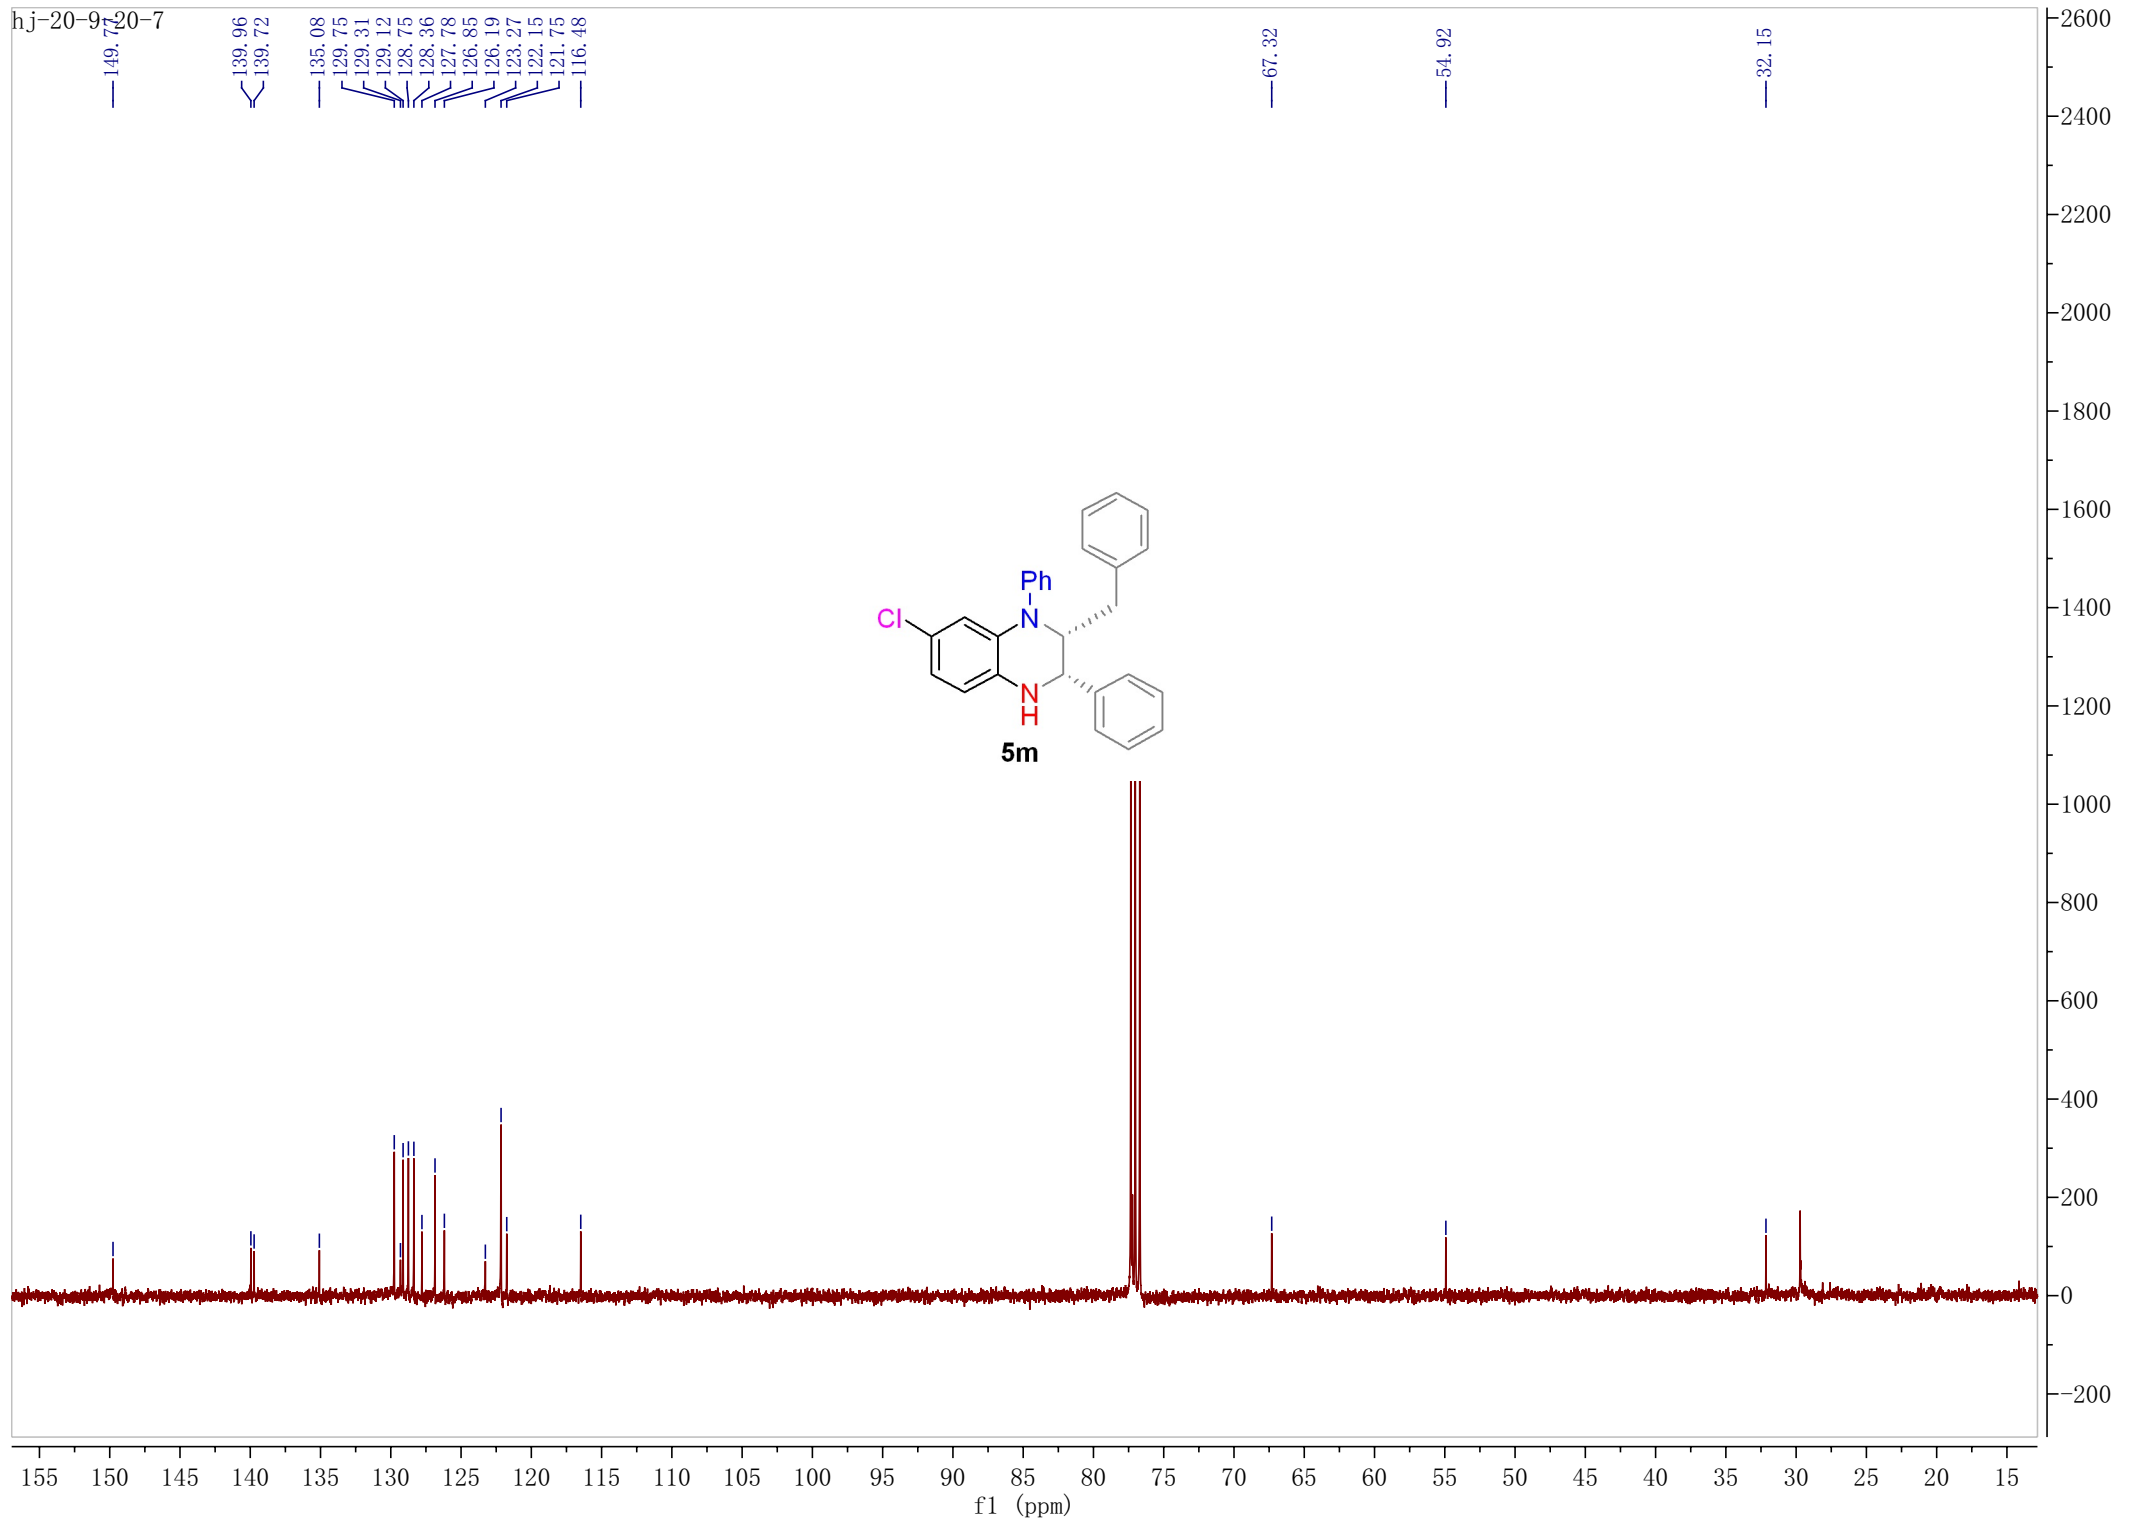

hj-5-11-9c2

8.03  
8.02  
8.01  
8.00

7.57  
7.55  
7.48  
7.46  
7.46  
7.29  
7.28  
7.26  
7.24  
7.23  
7.21  
7.13  
7.11  
7.09  
7.07  
4.99  
4.78  
4.77  
4.75  
4.74

3.86  
3.84  
3.82  
3.81  
3.79

2.71  
2.69  
2.67  
2.66  
2.54  
2.52  
2.51  
2.49

0.89  
0.87  
0.80  
0.79

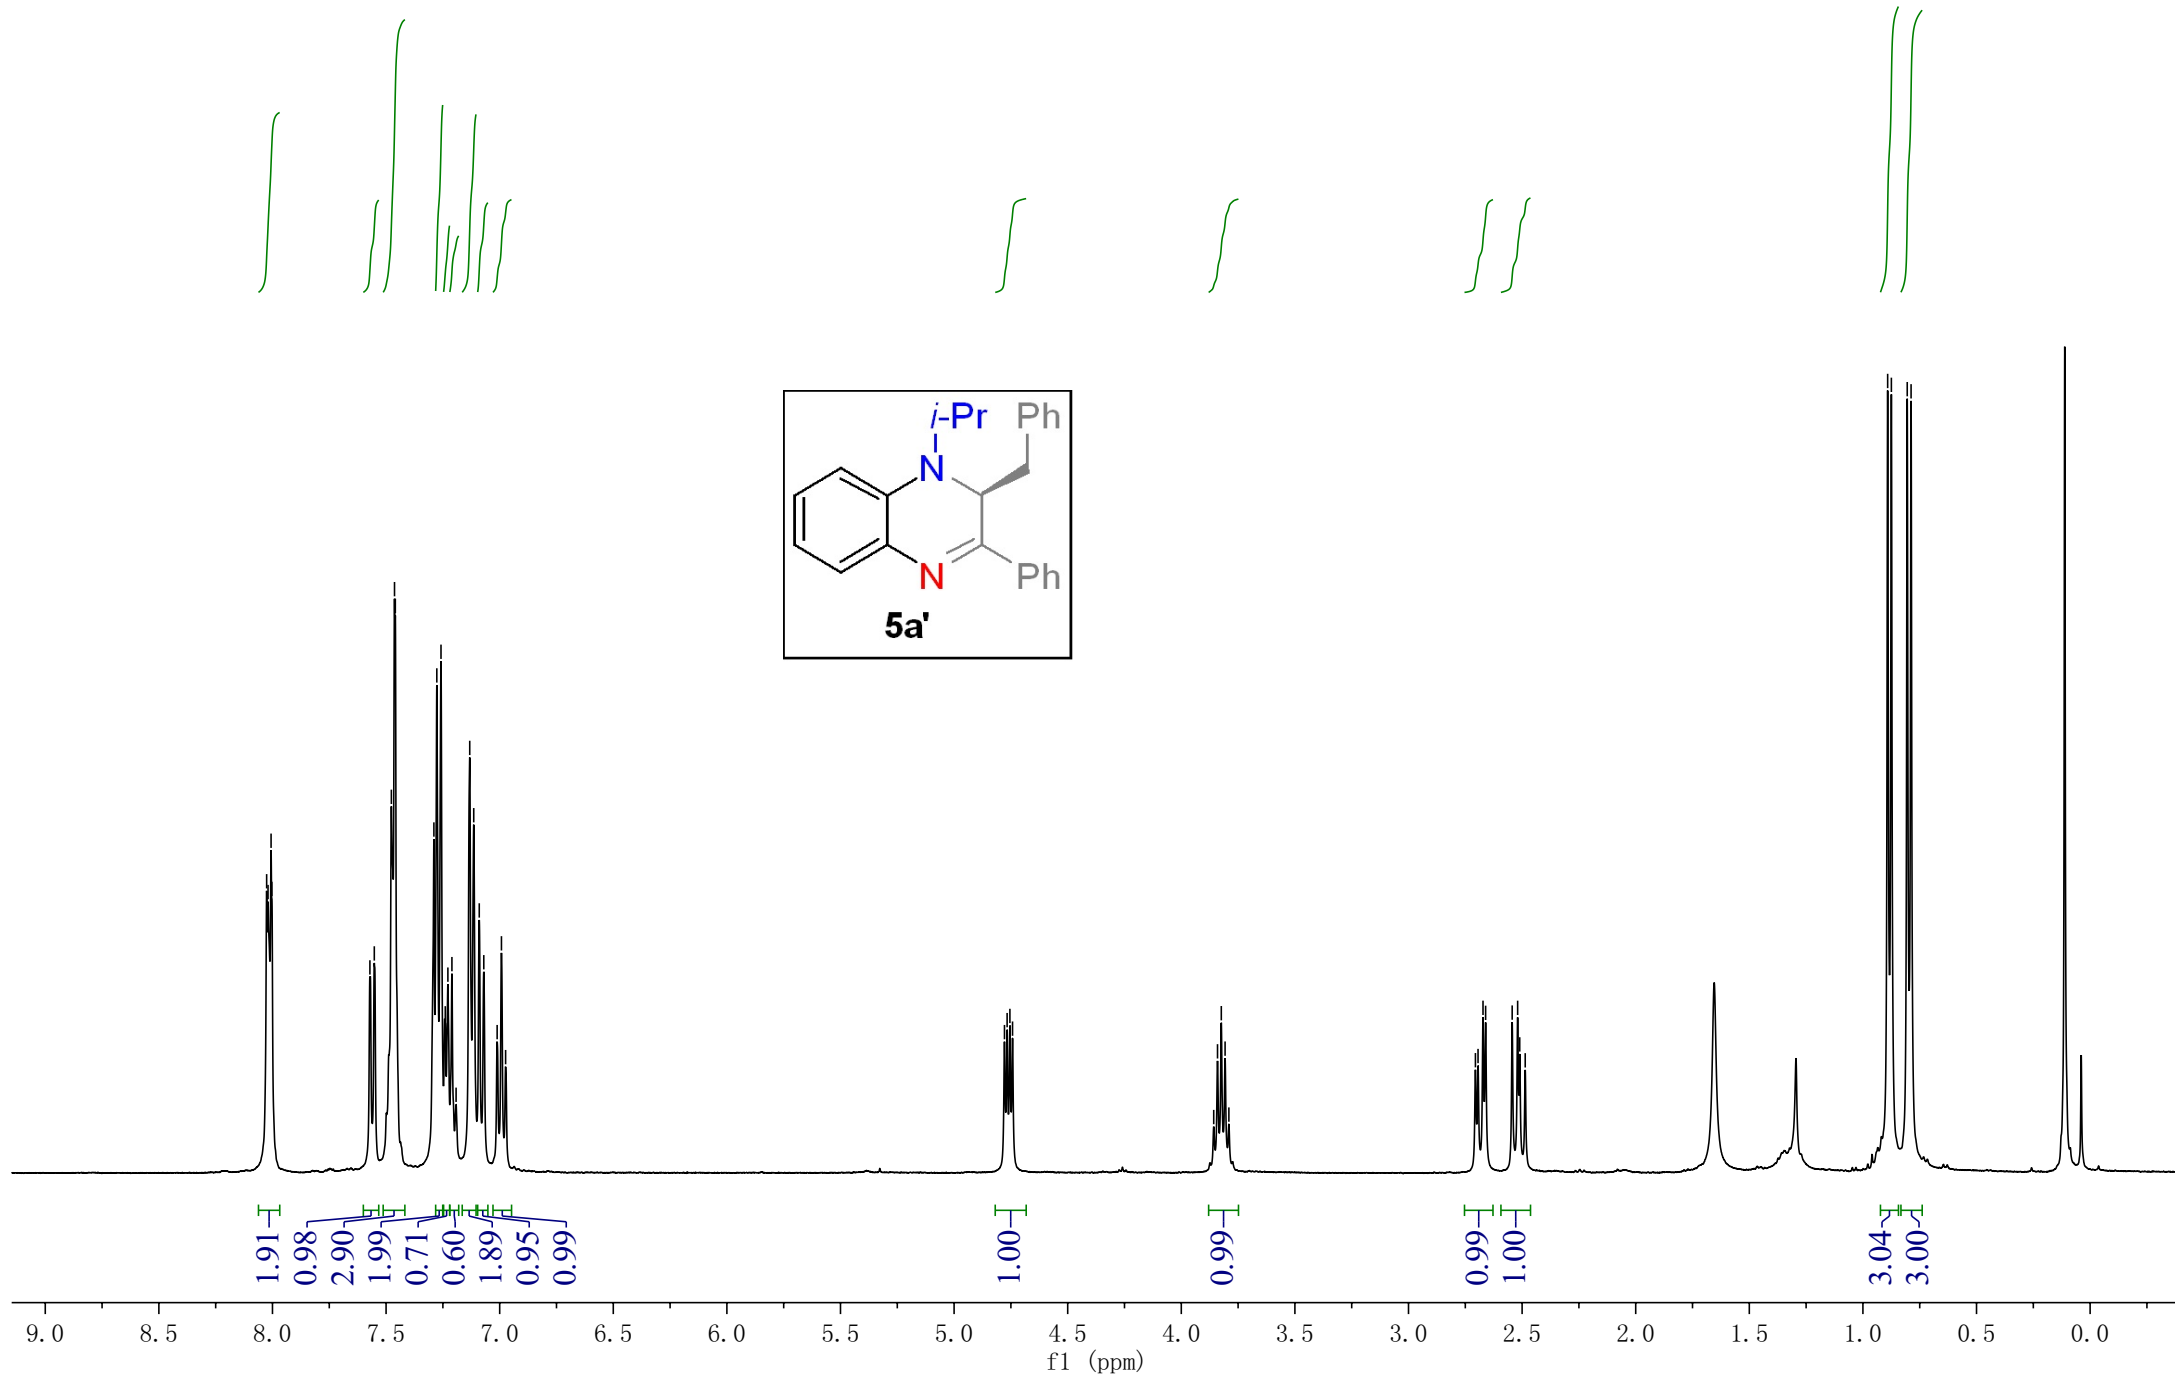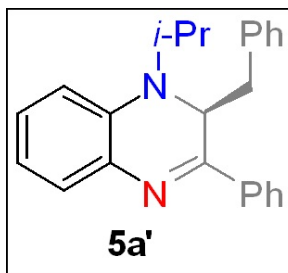



hj-20-9-29-1ya

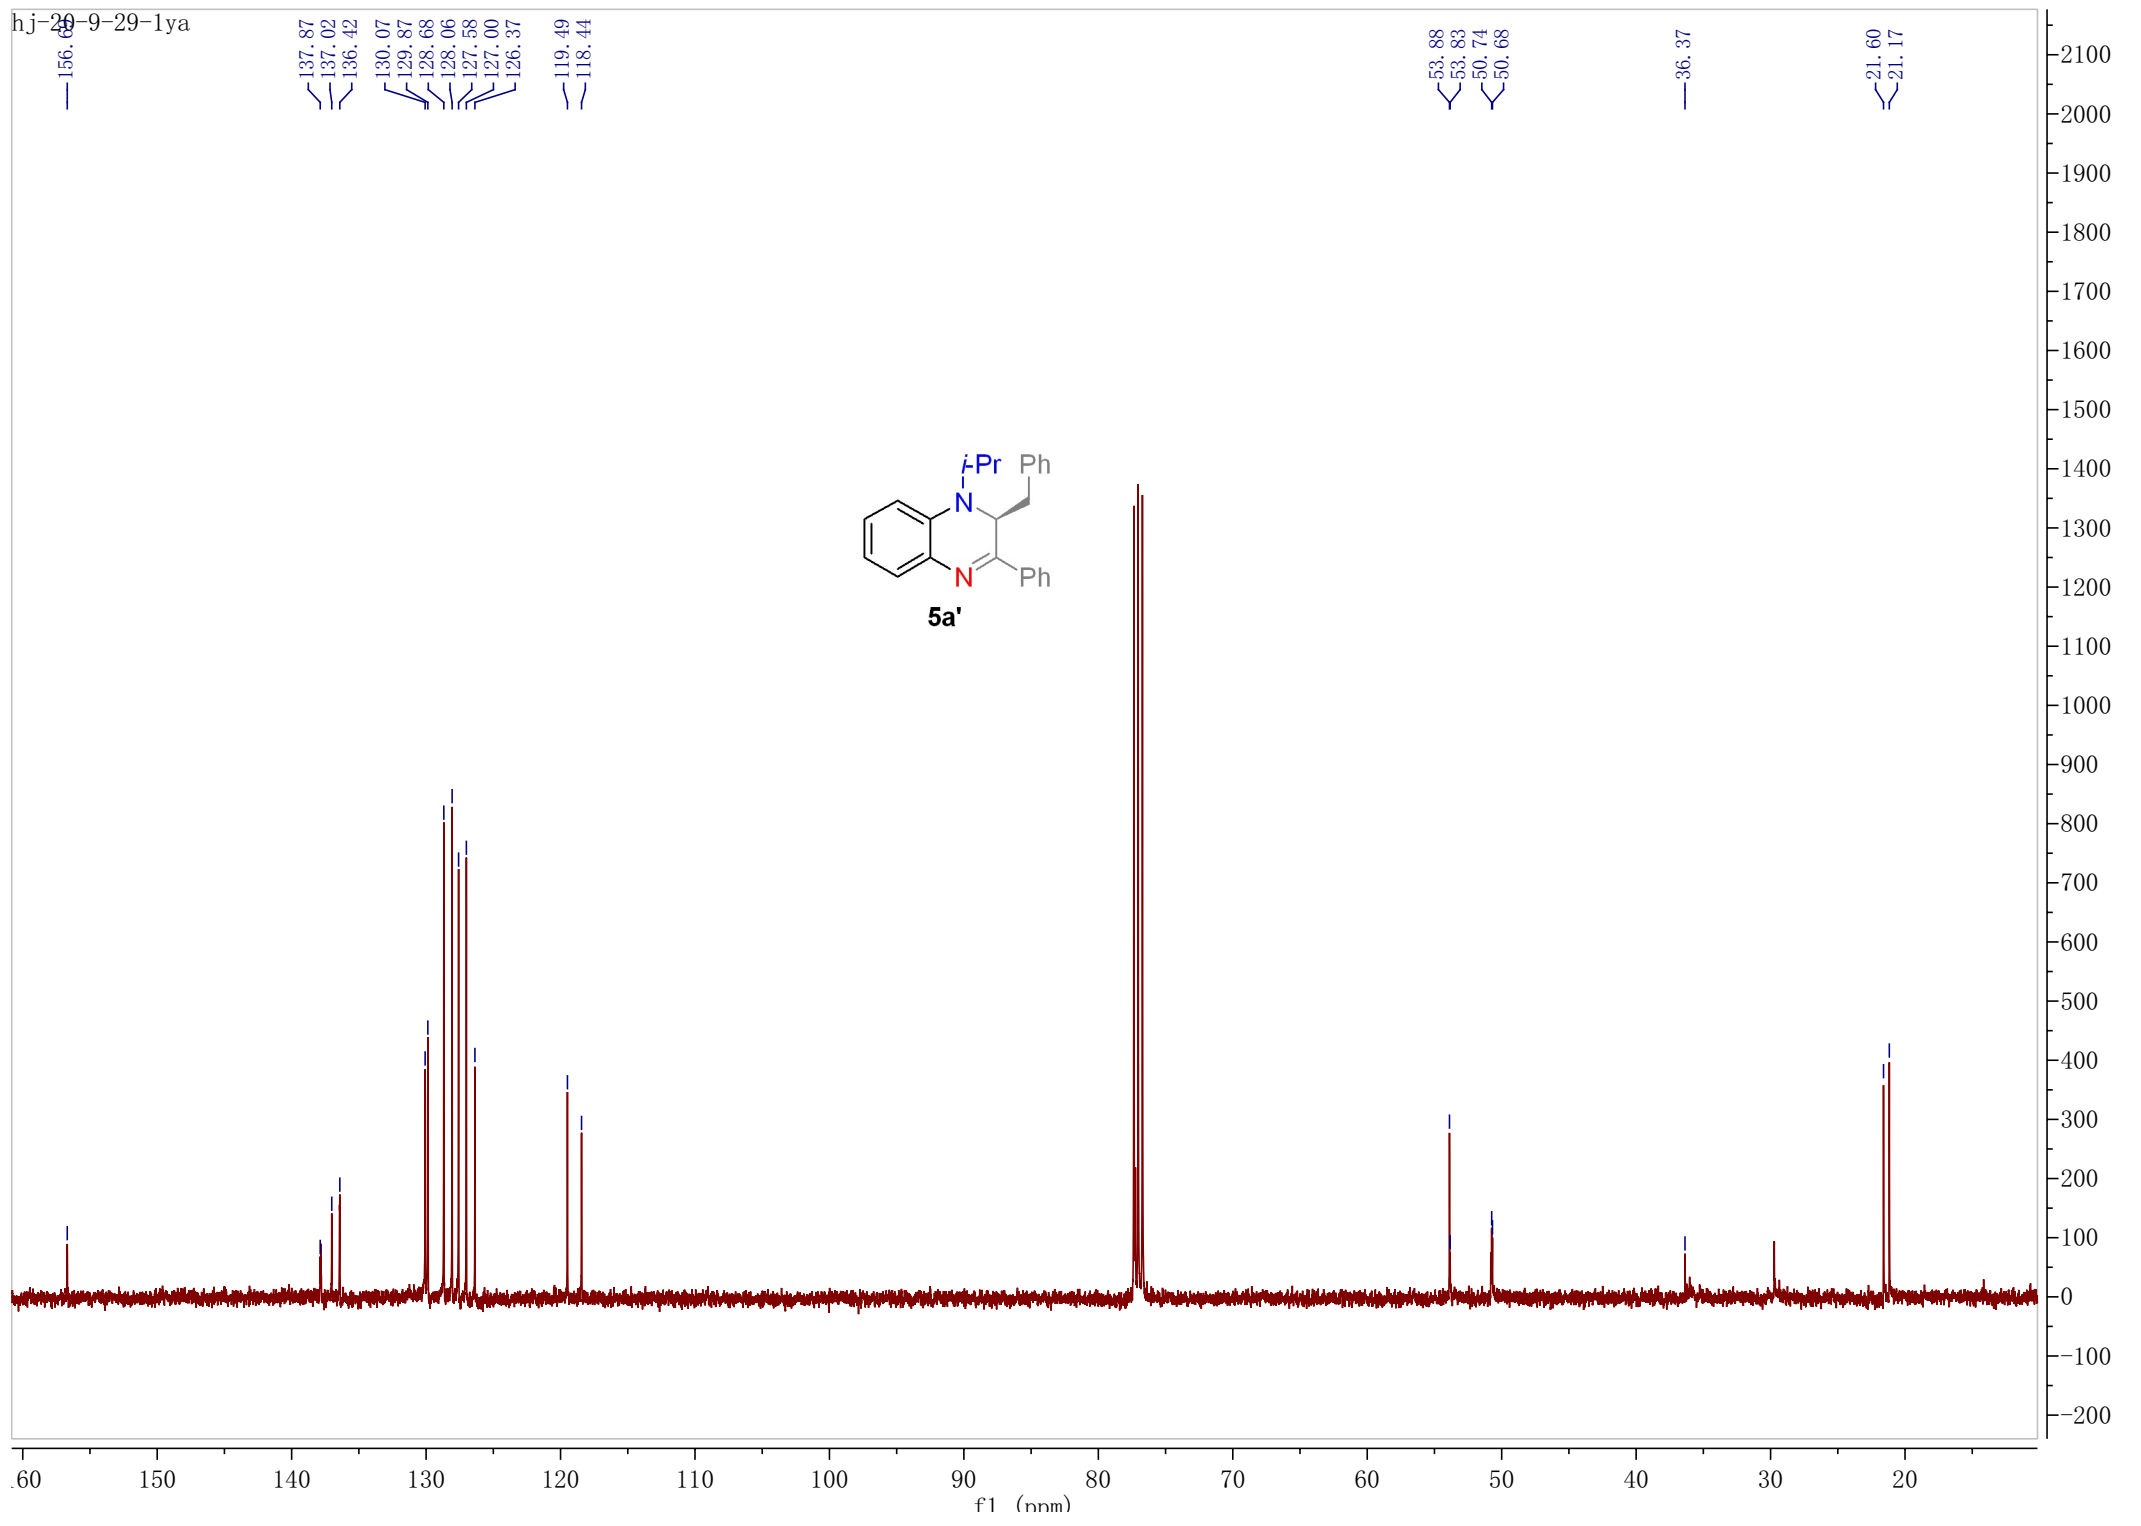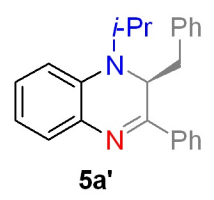

Supplement: SC-012-D0SC06264B-s001.pdf [file SC-012-D0SC06264B-s001.pdf]
